# Supplementary material
Source: PubMed Central journal article supplement (PMC6139071)
Supplement: NIHMS1501904-supplement-1.pdf [file NIHMS1501904-supplement-1.pdf]

## Supplementary Data Summary

### A Targeted Quantitative Proteomic Approach for Examining the Reprogramming of Small GTPases during Melanoma Metastasis

Ming Huang, Tianyu F. Qi, Lin Li, Gao Zhang, and Yinsheng Wang

#### I. Supplementary Figures

- 1) **Figure S1.** LC-MRM-based targeted quantitative proteomic assay revealed differential expression of small GTPases during melanoma metastasis.
- 2) **Figure S2.** The scheduled LC-MRM platform provides accurate retention time (RT) prediction of targeted peptides, high sensitivity and excellent reproducibility.
- 3) **Figure S3.** Validation of RAB32 expression in WM-115/WM-266-4 and IGR39/IGR37 paired melanoma cell lines.
- 4) **Figure S4.** RAB12 and RAB31 were differentially expressed in WM-115 and WM-266-4 cells.
- 5) **Figure S5.** Western blots confirmed the overexpression and knockdown of RAB38 in WM-115 and WM-266-4 cells, respectively.
- 6) **Figure S6.** RAB38 mediates both the expression levels and activities of MMP2 and MMP9 in metastatic IGR37 and M14 cells.
- 7) **Figure S7.** Correlations of mRNA expressions of *MITF*, *RAB38* and *RAB27A* with different genetic backgrounds of melanoma patients.
- 8) **Figure S8.** Up-regulation of *MITF* in metastatic melanoma cells.
- 9) **Figure S9.** *RAB38* expressions were highly correlated with *MITF* in a large number of melanoma cell line and melanoma patient cohorts.
- 10) **Figure S10.** Higher levels of expression of *RAB38* in metastatic melanoma compared to primary melanoma were observed in melanoma patient with *MITF* high signature.
- 11) **Figure S11.** Occurrence and prognostic values of *RAB38* promoter hypomethylation.

## II. Supplementary Methods and Materials

- 1) Sample Preparation and LC-MS/MS for Shotgun Proteomic Analysis.
- 2) Retention time (RT) Prediction for Small GTPase Peptides.
- 3) Sample Preparation and Scheduled LC-MRM Analysis.
- 4) Construction and Transfection of FLAG-tagged Fusion Protein Expression Plasmid.
- 5) siRNA Transfection.
- 6) Real-time Quantitative PCR (RT-qPCR).

## III. Supplementary Tables

- 1) **Table S1.** A complete list of primers used for real-time quantitative PCR (RT-qPCR) in this study.
- 2) **Table S2.** A complete list of small GTPases of the Ras superfamily in the human proteome.
- 3) **Table S3A.** A complete list of small GTPases in the Skyline MRM library with their gene names, IPI numbers, and targeted peptides and transitions.
- 4) **Table S3B.** A complete list of quantified small GTPase peptides and proteins in three sets of SILAC experiments for WM, IGR and WMLu paired melanoma cell lines.

## Supplementary Figures

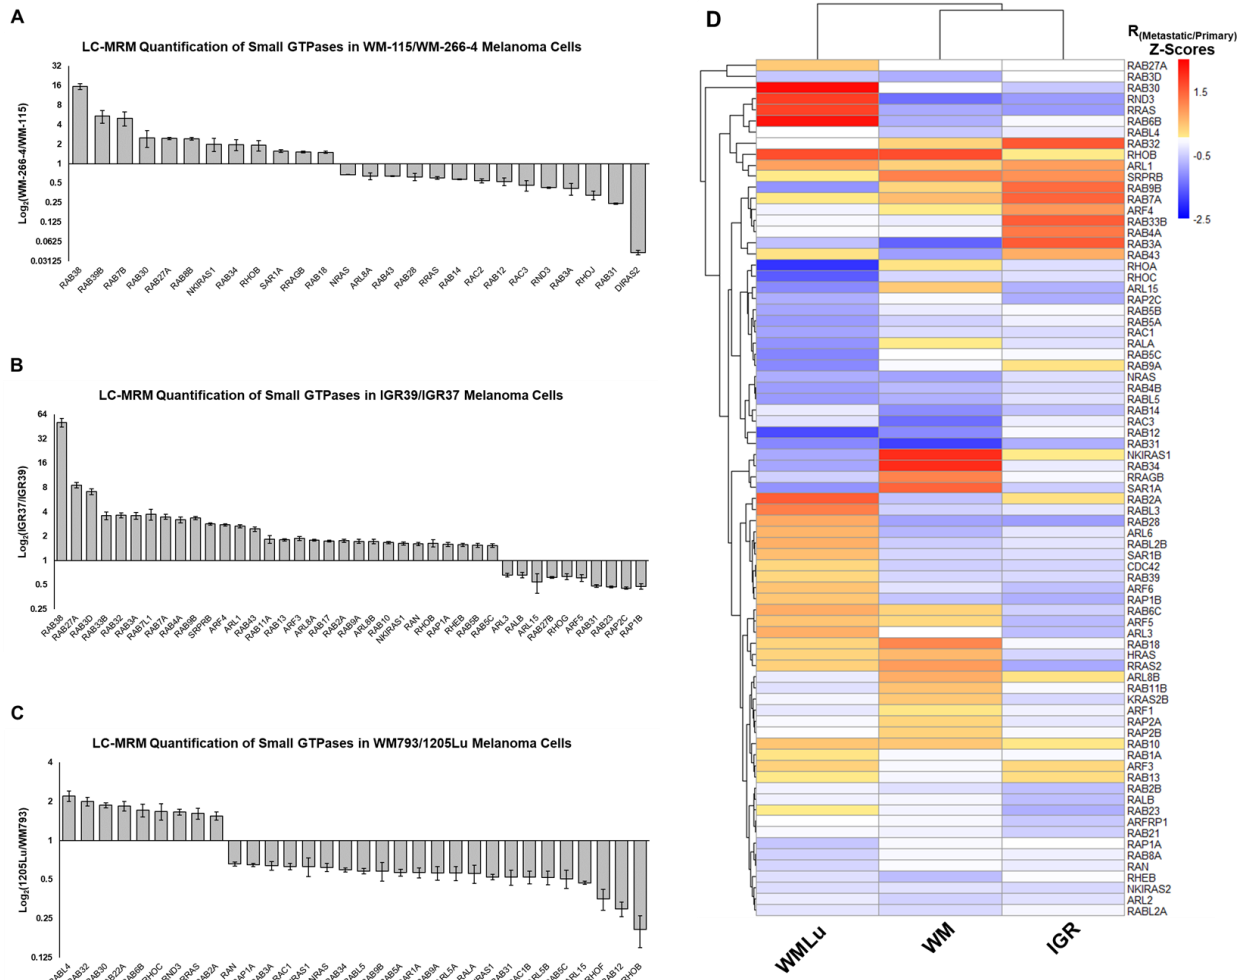

**Fig. S1. LC-MRM-based targeted quantitative proteomic assay revealed differential expression of small GTPases during melanoma metastasis.**

(A–C) Bar graphs showing substantially up-regulated (> 1.5-fold) and down-regulated (> 1.5-fold) small GTPases quantified from LC-MRM experiments for: (A) WM-115/WM-266-4 paired melanoma cell lines; (B) IGR39/IGR37 paired melanoma cell lines; and (C) WM793/1205Lu paired melanoma cell lines; Error bars in (A)–(C) represent mean  $\pm$  standard deviation of results from three independent SILAC labeling experiments (2 forward and 1 reverse SILAC labelings);

(D) Hierarchical clustering of commonly quantified small GTPases among the WM, IGR and WMLu paired melanoma cell lines using the Z-score values for  $R_{(metastatic/primary)}$  for individual proteins.

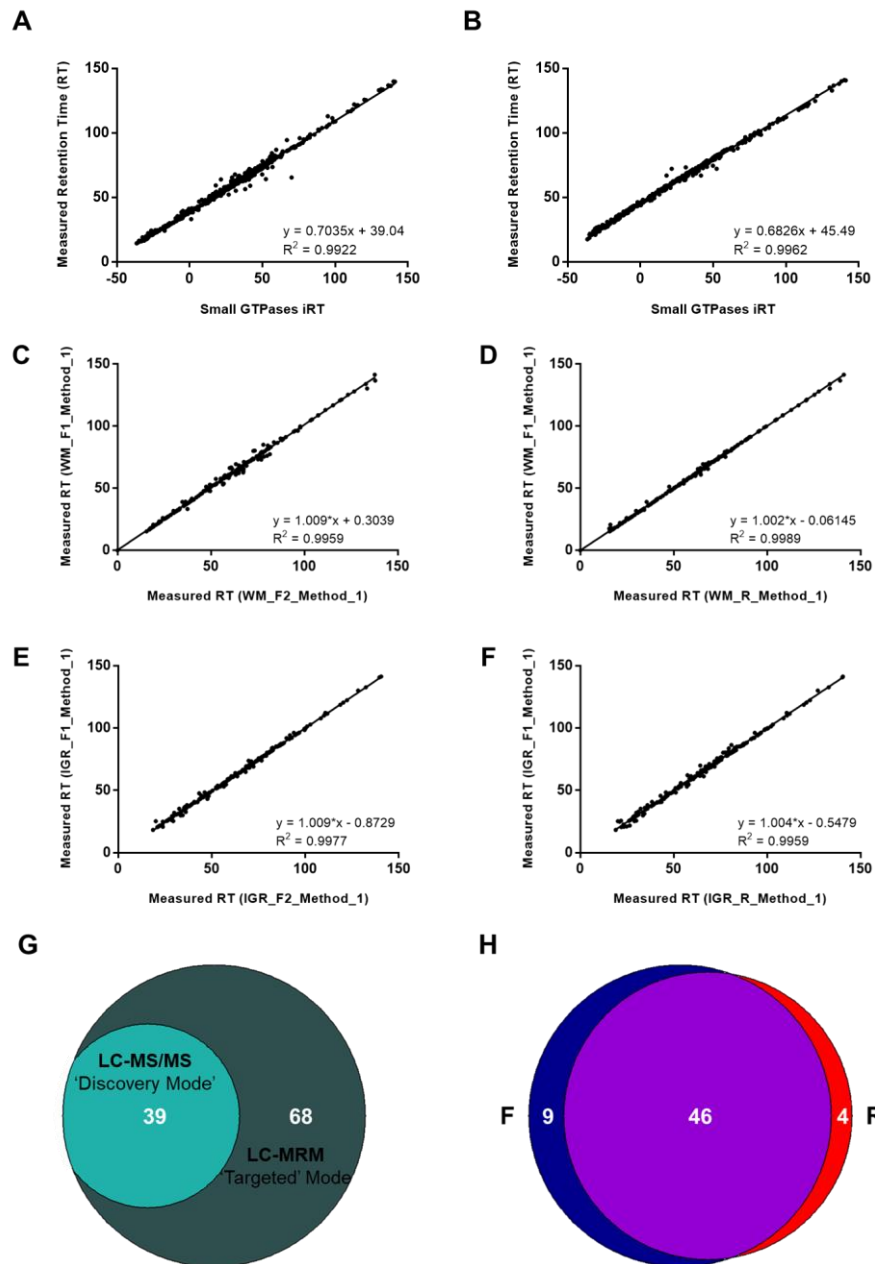

**Fig. S2. The scheduled LC-MRM platform provides accurate retention time (RT) prediction of targeted peptides, high sensitivity and excellent reproducibility.**

(A) The correlation between iRT and measured RT values in LC-MRM experiments using WM-115 and WM-266-4 SILAC cell lysates on a TSQ Vantage triple-quadrupole mass spectrometer (157-min linear gradient) with a very high correlation coefficient ( $R^2 = 0.992$ );

(B) The correlation between iRT and measured RT values in LC-MRM experiments using IGR39 and IGR37 SILAC cell lysates on the same instrument with the same gradient as in (A) with a very high correlation coefficient ( $R^2 = 0.996$ );

(C) The measured RT obtained in two forward labeling reactions (F1 vs. F2) for WM samples with a very high correlation coefficient ( $R^2 = 0.9997$ );

- (D)** The measured RT obtained in one forward and one reverse labeling reactions (F1 vs. R) for WM samples with a very high correlation coefficient ( $R^2 = 0.9998$ );
- (E)** The measured RT obtained in two forward labeling reactions (F1 vs. F2) for IGR samples with a very high correlation coefficient ( $R^2 = 0.9997$ );
- (F)** The measured RT obtained in one forward and one reverse labeling reactions (F1 vs. R) for IGR samples with a very high correlation coefficient ( $R^2 = 0.9996$ );
- (G)** A Venn diagram showing the overlap of quantified small GTPases from WM-115 and WM-266-4 SILAC cell lysates obtained from LC-MRM analysis and shotgun proteomics experiments;
- (H)** A Venn diagram depicting the overlap of quantified small GTPases from WM-115 and WM-266-4 SILAC cell lysates the forward (F) and the reverse (R) labeling experiments obtained from shotgun proteomics experiments.

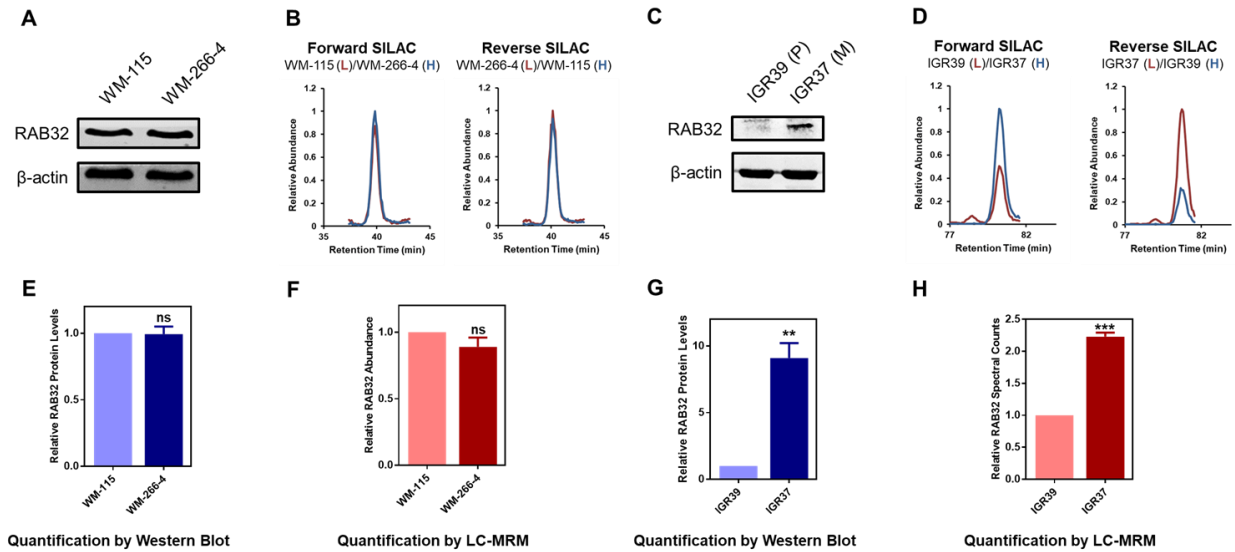

**Fig. S3. Validation of RAB32 expression in WM-115/WM-266-4 and IGR39/IGR37 paired melanoma cell lines.**

(A, C) Immunoblots of RAB32 in whole cell lysates from (A) WM-115/WM-266-4 and (C) IGR39/IGR37 cells, respectively, where  $\beta$ -actin served as a loading control;

(B, D) Representative LC-MRM traces for the quantification of peptide VLVIGELGVGK from RAB32 in forward and reverse SILAC labeling experiments for (B) WM-115/WM-266-4 and (D) IGR39/IGR37 cells, respectively;

(E, G) Quantification results for RAB32 based on Western blots analyses in panels (A) and (C);

(F, H) Quantification results for RAB32 based on LC-MRM analyses in panels (B) and (D). Error bars in (C) and (D) represent mean  $\pm$  standard deviation ( $n = 3$ ). The  $p$  values were calculated by using a paired two-tailed Student's  $t$  test: “ns”, not significant; “\*\*”,  $0.001 < p < 0.01$ ; “\*\*\*”,  $p < 0.001$ .

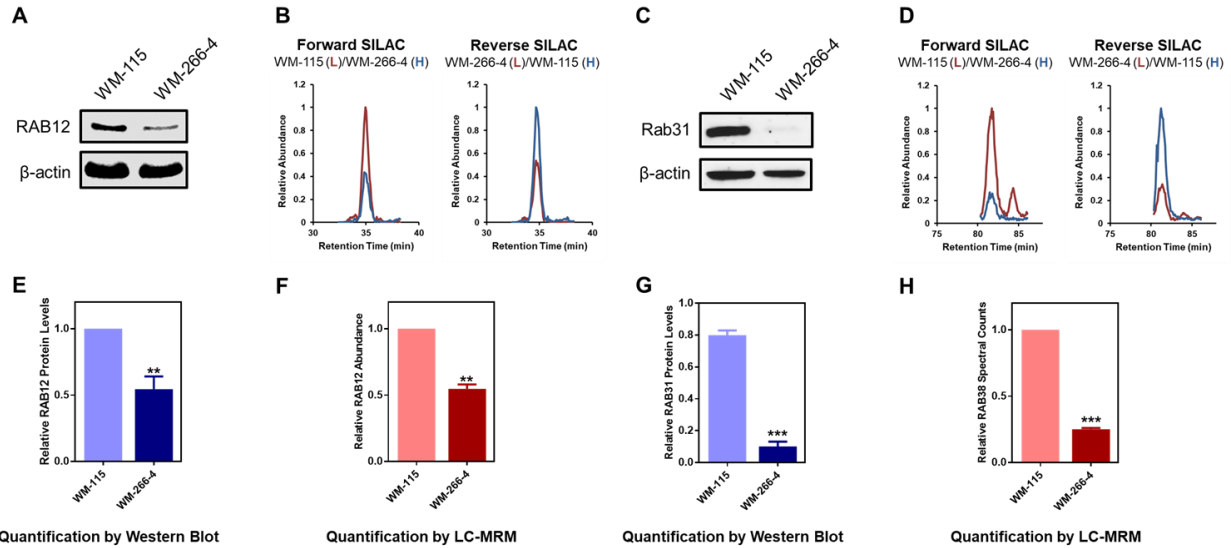

**Fig. S4. RAB12 and RAB31 were differentially expressed in WM-115 and WM-266-4 cells.**

(A) Immunoblots of RAB12 in whole cell lysates from WM-115 and WM-266-4 cells, where  $\beta$ -actin served as a loading control;

(B) Representative LC-MRM traces for the quantification of peptide AGGGGGLGAGSPALSGGQGR from RAB12 in forward and reverse SILAC labeling experiments;

(C) Quantification results for RAB12 based on Western blots analyses;

(D) Quantification results for RAB12 based on LC-MRM analyses. Error bars in (C) and (D) represent standard deviation ( $n = 3$ );

(E) Immunoblots of whole cell lysates from WM-115 and WM-266-4 cells, where  $\beta$ -actin served as a loading control;

(F) Representative LC-MRM traces for the quantification of peptide GSAAAVIVYDITK from RAB31 in forward and reverse SILAC labeling experiments;

(G) Quantification results for RAB31 based on Western blots analyses;

(H) Quantification results for RAB31 based on LC-MRM analyses. Error bars represent mean  $\pm$  standard deviation ( $n = 3$ ). The  $p$  values were calculated by using a paired two-tailed Student's  $t$  test: “\*\*”,  $0.001 < p < 0.01$ ; “\*\*\*”,  $p < 0.001$ .

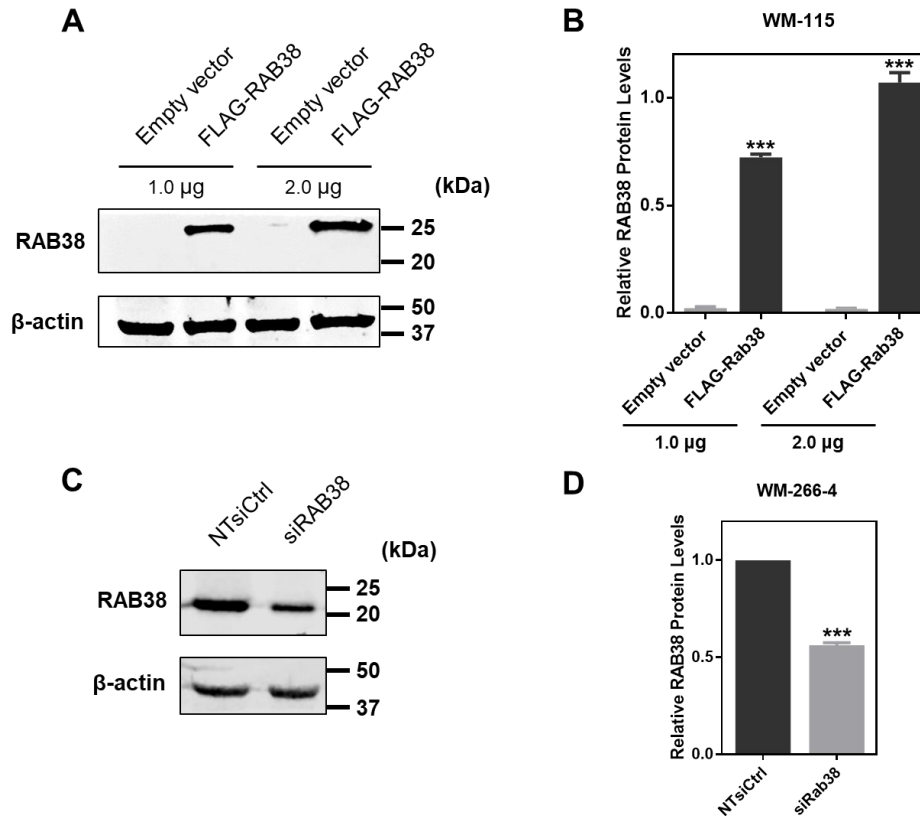

**Fig. S5. Western blots confirmed the overexpression and knockdown of RAB38 in WM-115 and WM-266-4 cells, respectively.**

(A) Representative immunoblots showing the ectopic expression of RAB38 in WM-115 cells, where  $\beta$ -actin served as a loading control;

(B) Quantification results for Western blot analyses;

(C) Representative immunoblots showing siRNA-mediated knockdown of RAB38 in WM-266-4 cells, where  $\beta$ -actin served as a loading control;

(D) Quantification results for Western blot analyses. Error bars in panels (B) and (D) represent standard deviation ( $n = 3$ ). The  $p$  values were calculated by using an unpaired two-tailed Student's  $t$  test: “\*\*\*”,  $p < 0.001$ .

+



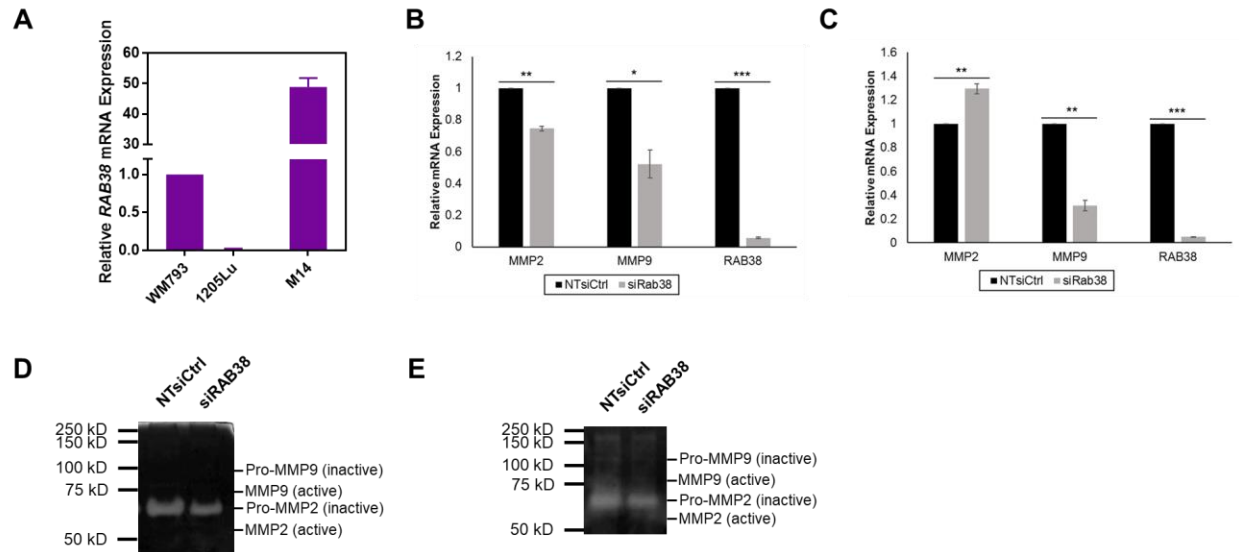

**Fig. S6. RAB38 mediates both the expression levels and activities of MMP2 and MMP9 in metastatic M14 and IGR37 cells.**

(A) RT-qPCR analysis showed pronouncedly higher expression levels of *RAB38* in M14 cells as compared to WM793 and 1205Lu cells. Error bars represent mean  $\pm$  SEM (n = 3);

(B) RT-qPCR analysis showed decreased expression levels of *MMP2* and *MMP9* in M14 cells with siRAB38 knockdown as compared to non-targeting siRNA control. Error bars represent mean  $\pm$  SEM (n = 3);

(C) RT-qPCR analysis showed decreased expression level of *MMP9*, but not *MMP2*, in IGR37 cells with siRAB38 knockdown as compared to non-targeting siRNA control. Error bars represent mean  $\pm$  SEM (n = 3); The *p* values in (A) and (B) were calculated by using unpaired two-tailed Student's *t* test: “\*”, 0.01 < *p* < 0.05; “\*\*”, 0.001 < *p* < 0.01; “\*\*\*”, *p* < 0.001;

(D) Gelatin zymography assays revealed diminished enzymatic activities of MMP2 and MMP9 in M14 cells with siRAB38 knockdown as compared to non-targeting siRNA control;

(E) Gelatin zymography assays revealed diminished enzymatic activities of MMP2 and MMP9 in IGR37 cells with siRAB38 knockdown as compared to non-targeting siRNA control.

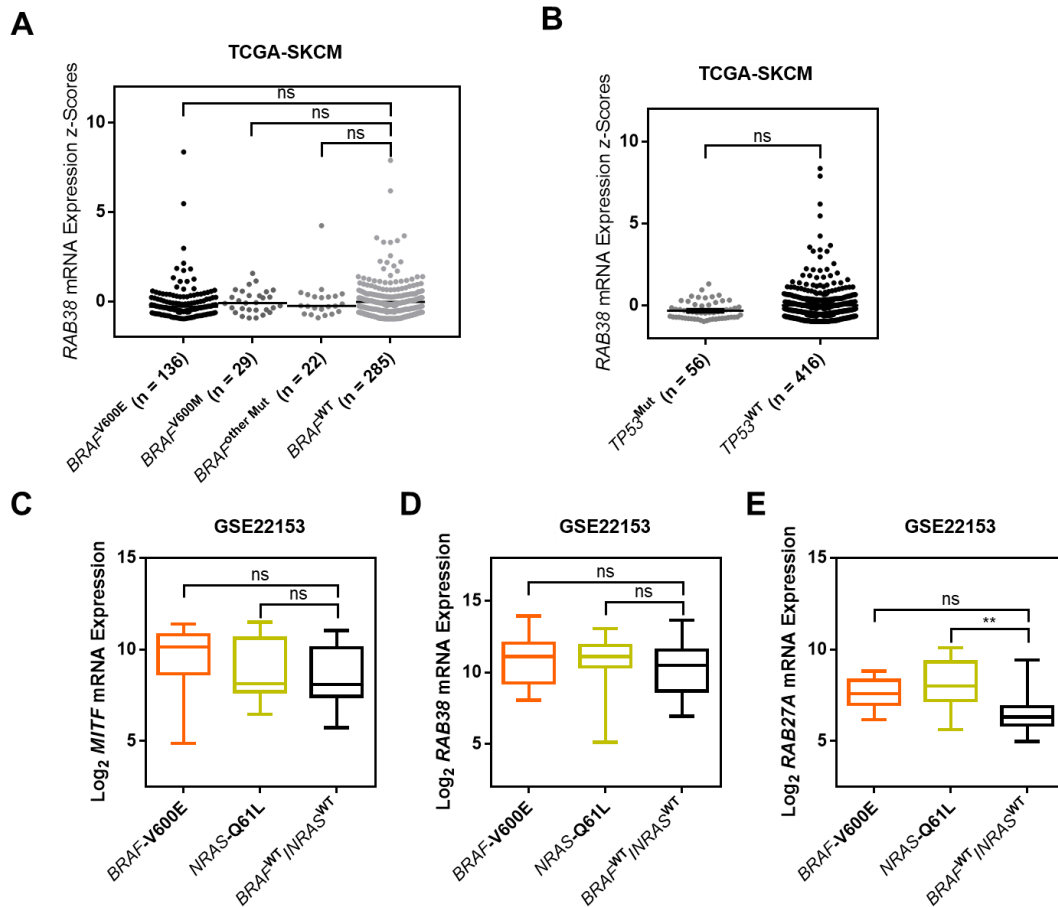

**Fig. S7. Correlations of mRNA expressions of *MITF*, *RAB38* and *RAB27A* with different genetic backgrounds of melanoma patients.**

(A) Scatter plot showing the lack of correlations of *RAB38* mRNA expressions with wild-type/mutant *BRAF* in the TCGA-SKCM melanoma patient cohort;

(B) Scatter plot showing the lack of correlations of *RAB38* mRNA expressions with wild-type/mutant *TP53* in the TCGA-SKCM melanoma patient cohort;

(C–E) Box plots showing the correlations of (C) *MITF* mRNA expressions, (D) *RAB38* mRNA expressions and (E) *RAB27A* mRNA expressions with wild-type/mutant *BRAF* and *NRAS* oncogenes in melanoma patient cohort GSE22153.

**A**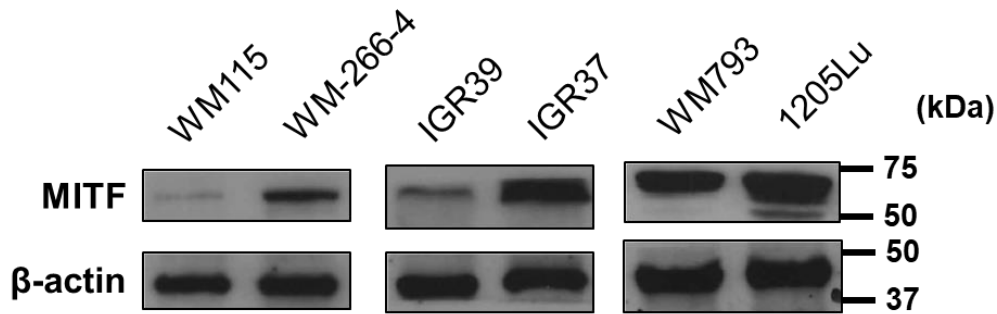**B**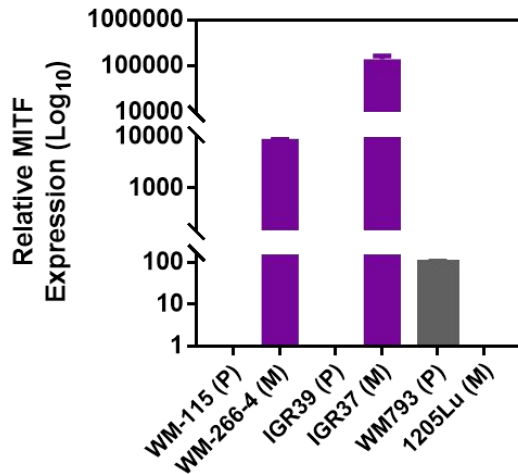**C**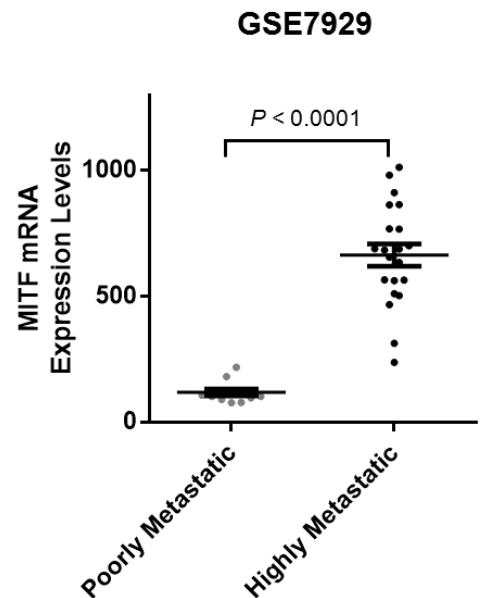

**Fig. S8. Up-regulation of *MITF* in metastatic melanoma cells.**

(A) Immunoblots of MITF in the whole cell lysates from WM-115/WM-266-4, IGR39/IGR37 and WM793/1205Lu melanoma cells, where  $\beta$ -actin served as a loading control;

(B) RT-qPCR measurements of relative *MITF* mRNA expression levels in WM-115/WM-266-4, IGR39/IGR37 and WM793/1205Lu melanoma cells (n = 3);

(C) *RAB38* and *MITF* mRNA levels were significantly up-regulated in the highly metastatic derivatives of A375 cells cell lines compared to the poorly metastatic A375 parental cells (GEO data series: GSE7929). The *p* values were calculated by using an unpaired two-tailed Student's *t* test.

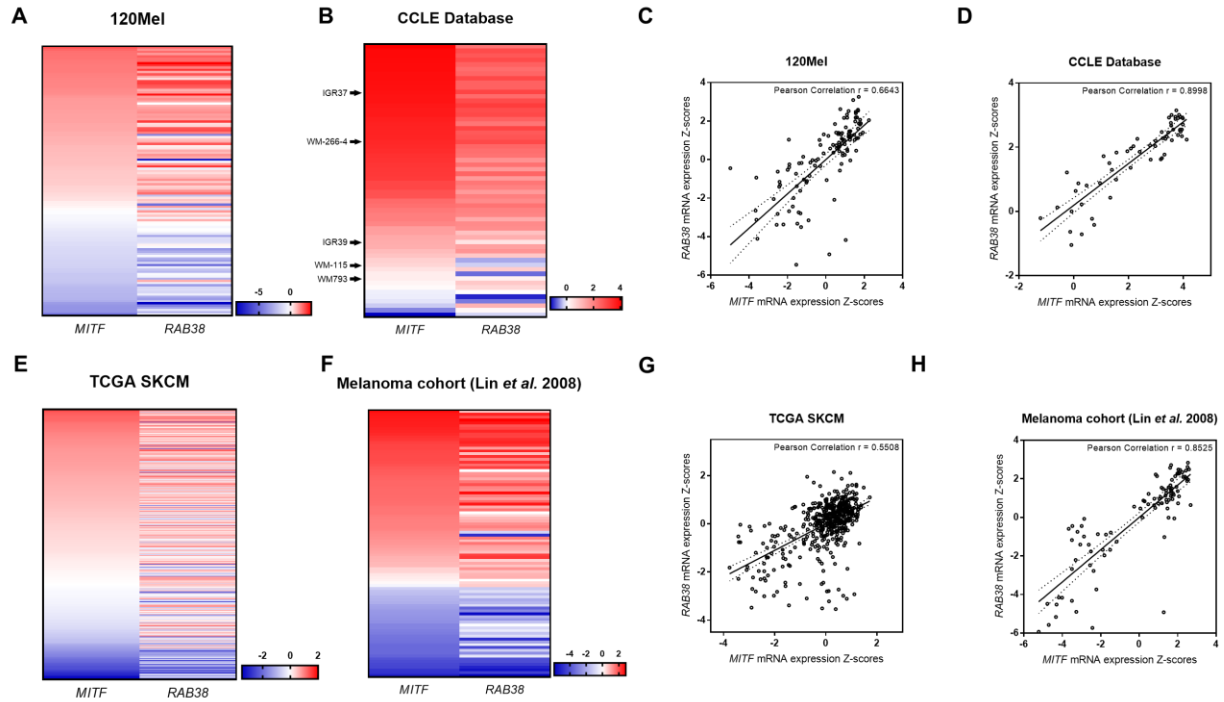

**Fig. S9. *RAB38* expressions were highly correlated with *MITF* in melanoma cell lines and melanoma patient cohorts.** Shown are heatmaps displaying the correlations between *RAB38* and *MITF* mRNA expressions in the:

(A) 120Mel melanoma cell line cohort; (B) CCLE melanoma cell line cohort; (C–D) A scatter plot showing the Pearson correlation analysis of data shown in (A) and (B);

(E) TCGA-SKCM patient cohort; (F) another melanoma patient cohort provided by Lin *et al.* (2008); (G–H) A scatter plot showing the Pearson correlation analysis of data shown in (E) and (F).

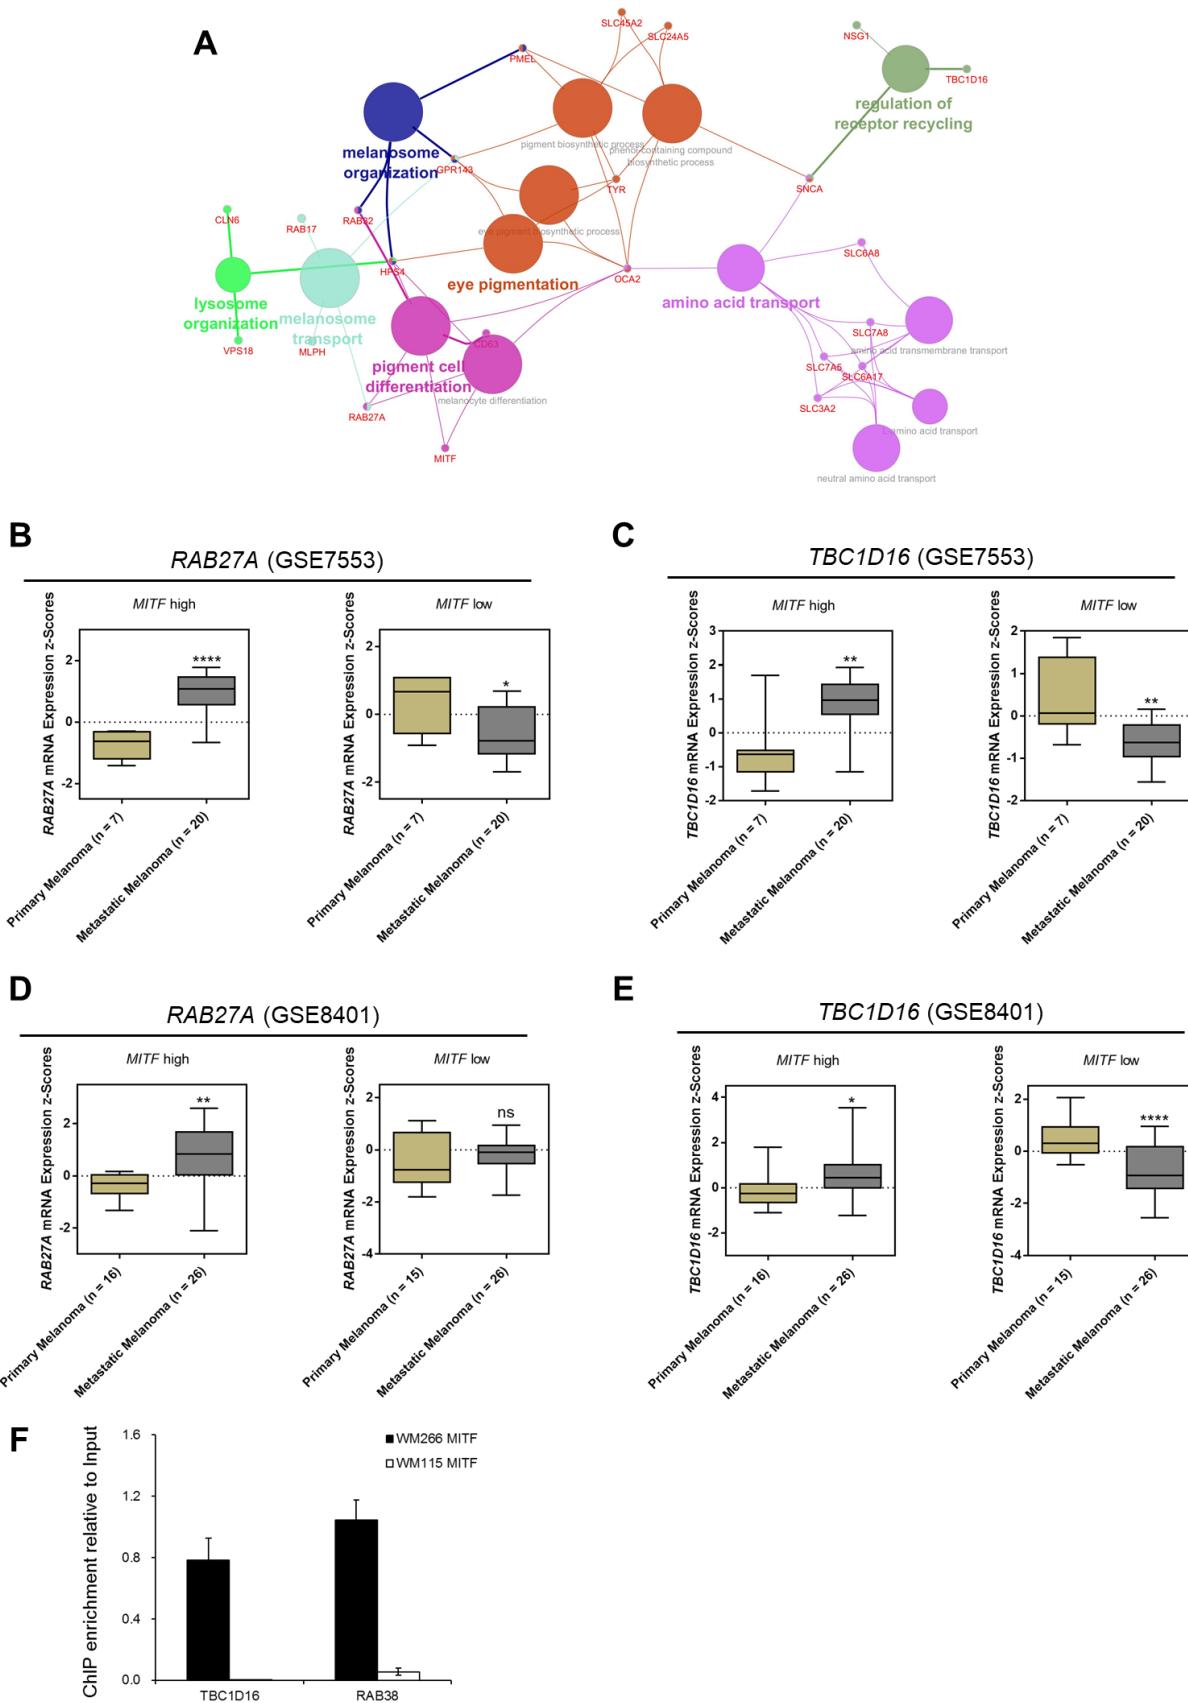

**Fig. S10. Higher levels of expression of *RAB38* in metastatic melanoma compared to primary melanoma were observed in melanoma patient with *MITF* high signature.**

(A) Pathway analysis showed enrichment of *MITF*, *TBC1D16* and *RAB27A* in the *RAB38* co-expression signature;

(B) Box plot showed *RAB27A* mRNA expressions in the metastatic patient tissues carrying *MITF*-high or *MITF*-low signature in the GSE7553 cohort;

(C) Box plot showed *TBC1D16* mRNA expressions in the metastatic patient tissues carrying *MITF*-high or *MITF*-low signature in the GSE7553 cohort;

(D) Box plot showed *RAB27A* mRNA expressions in the metastatic patient tissues carrying *MITF*-high or *MITF*-low signature in the GSE8401 cohort;

(E) Box plot showed *TBC1D16* mRNA expressions in the metastatic patient tissues carrying *MITF*-high or *MITF*-low signature in the GSE8401 cohort;

(F) ChIP-PCR assays showed enrichment of the association of *MITF* with the promoters of *TBC1D16* and *RAB38* genes in WM-266-4 cells relative to WM-115 cells. Data were normalized to control IgG ChIP. Error bars represent mean  $\pm$  standard deviation (n = 3).

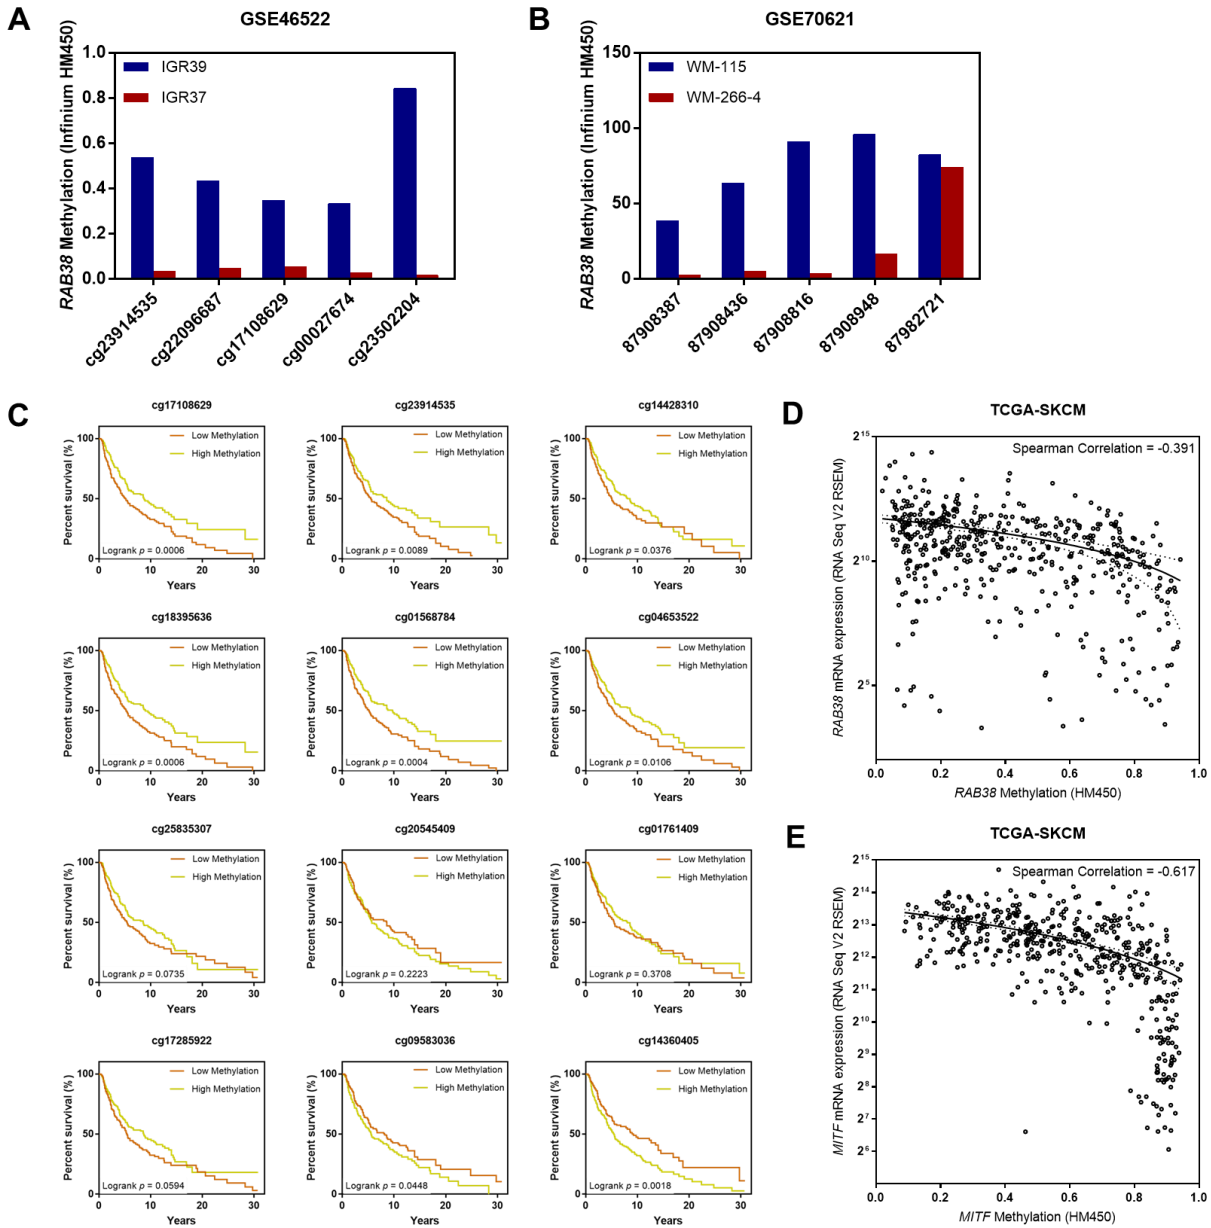

**Fig. S11. Occurrence and prognostic values of *RAB38* promoter hypomethylation.**

(A) Methylation microarray data showed lower methylation levels at multiple CpG sites of the *RAB38* promoter region in IGR37 cell line relative to IGR39 cell line in the GSE46522 cohort;

(B) Methylation microarray data showed lower methylation levels at multiple CpG sites of the *RAB38* promoter region in WM-266-4 cell line relative to WM-115 cell line in the GSE70621 cohort;

(C) Kaplan-Meier curves showing that the presence of *RAB38* hypomethylation at multiple CpG sites in melanoma patients (n = 464) is significantly associated with shorter overall survival in the TCGA-SKCM cohort;

**(D)** Scatter plot showing the correlations of *RAB38* mRNA expressions with *RAB38* promoter CpG methylation in the TCGA-SKCM cohort;

**(E)** Scatter plot showing the correlations of *MITF* mRNA expressions with *MITF* promoter CpG methylation in the TCGA-SKCM cohort.



## Supplementary Materials and Methods

**Sample Preparation and LC-MS/MS for Shotgun Proteomic Analysis.** For acquiring shotgun proteomic data to establish an MRM library for small GTPases, the individually collected cell pellets from 9 human cell lines were lysed, and the resulting cell lysates were collected by centrifugation and separated by electrophoresis using a 16% SDS-PAGE gel. The gel bands in the molecular weight range of 15–37 kDa were cut into 7 pieces, reduced with dithiothreitol, alkylated with iodoacetamide, and in-gel digested with trypsin at an enzyme/protein ratio of 1:100.

In shotgun proteomic experiments, peptide samples were subjected to LC-MS/MS analysis on either an LTQ Orbitrap Velos mass spectrometer or a Q Exactive Plus mass spectrometer that was equipped with a nanoelectrospray ionization source and coupled to an EASY-nLC II (Thermo, San Jose, CA), as described previously.<sup>63</sup> A homemade trapping column (150  $\mu\text{m}$   $\times$  50 mm), packed with ReproSil-Pur C18-AQ resin, and an analytical column (75  $\mu\text{m}$   $\times$  120 mm), packed with ReproSil-Pur C18-AQ resin (Dr. Maisch HPLC GmbH, Germany) with particle sizes of 5  $\mu\text{m}$  and 3  $\mu\text{m}$ , respectively, were used for peptide separation. Peptide samples were initially loaded onto the trapping column with a solvent mixture of 0.1% formic acid in  $\text{CH}_3\text{CN}/\text{H}_2\text{O}$  (2:98, v/v) at a flow rate of 3.0  $\mu\text{L}/\text{min}$ . The peptides were then separated using a 150-min linear gradient of 8–35% acetonitrile in 0.1% formic acid at a flow rate of 300 nL/min. The mass spectrometer was operated in data-dependent acquisition (DDA) mode, where one full MS scan (resolution = 60,000) at an automatic gain control (AGC) target of  $10^6$  was followed with up to 20 MS/MS scans for the most abundant ions observed in MS. The selected ions were excluded from further analysis for 90 s. Ions with singly or unassigned charge states were not fragmented. The maximum ion accumulation time was 1000 ms for each full MS scan, and 50 ms for each MS/MS scan. The raw data were searched against the IPI human database (version 3.68, 87,061 entries). For database

search, up to one trypsin missed cleavage per peptide was allowed, and MS/MS spectral assignment was performed with less than 1% false discovery rate (FDR).

**Retention time (RT) Prediction for Small GTPase Peptides.** To facilitate automated and multiplexed MRM analyses, we generated an interactive MRM spectral library file containing the tandem mass spectra of peptides derived from small GTPases, which were acquired from the above-described shotgun proteomic experiments, using Skyline (version 3.5). Precursor and fragment ions for targeted GTPase peptides were selected and further refined to avoid spectral interference. If applicable, three unique peptides were selected for subsequent targeted analysis in the MRM mode.(1) In addition, we employed the aforementioned iRT algorithm to develop the scheduled MRM method.(2) To calculate the iRT score for each targeted peptide from small GTPases in the MRM spectral library, we selected 10 peptides from the tryptic digestion mixture of bovine serum albumin (BSA) as reference peptides to set up an iRT scale. By manually setting the iRT values of the BSA peptides AEFVEVTK and DAFLGSFLYEYSR as 0 and 100, respectively, a linear regression equation was obtained by plotting the iRT scores against their empirically measured retention times (RTs) derived from the LC-MS/MS analyses. Subsequently, the iRT values for the other eight standard BSA peptides were determined using the above-mentioned linear equation along with their empirically measured RTs in the shotgun proteomic experiments.

The BSA peptide mixture was then spiked into the small GTPase peptide mixtures for the LC-MS/MS analyses on an LTQ Orbitrap Velos mass spectrometer equipped with an Easy-nLC II system with a 150-min linear gradient of 8–35% acetonitrile in 0.1% formic acid, or a Q Exactive Plus mass spectrometer equipped with an Easy-nLC 1000 system with a 172-min linear gradient of 8–35% acetonitrile in 0.1% formic acid. RTs were extracted for all BSA standard peptides as

well as targeted peptides using the Skyline MS1 filtering workflow. The iRT values for all small GTPase peptides were calculated based on linear regression of iRT and experimentally measured RT of peptides with previously determined iRT scores.

**Sample Preparation and Scheduled LC-MRM Analysis.** To rigorously examine the differential expression of small GTPases in paired primary/metastatic melanoma cells, we conducted forward and reverse SILAC experiments, where the light and heavy lysates of paired primary melanoma cells (WM-115, IGR39 or WM793) were mixed with the heavy and light lysates from metastatic melanoma cells (WM-266-4, IGR37 or 1205Lu), respectively, at a 1:1 ratio (by mass). The mixed cell lysates were then loaded onto a 10% SDS-PAGE gel and separated by electrophoresis. The gel bands corresponding to the molecular weight range of 15–37 kDa were cut, reduced with 20 mM dithiothreitol, alkylated with 55 mM iodoacetamide, and in-gel digested with trypsin at an enzyme/protein ratio of 1:100.

All LC-MRM analyses were performed on a TSQ Vantage triple-quadrupole mass spectrometer equipped with an Easy-nLC II system. The peptide mixtures were separated with a 157-min linear gradient of 2–35% acetonitrile in 0.1% formic acid and at a flow rate of 230 nL/min. The spray voltage was 1.8 kV, Q1 and Q3 resolutions were 0.7 Da, and the cycle time was 5 s. The optimal collisional energy (CE) set for each targeted peptide was calculated using a linear equation specific to the TSQ Vantage instrument and the precursor mass-to-charge ratio ( $m/z$ ) according to the default setting in Skyline.

The tryptic peptide mixture of BSA was subjected to unscheduled LC-MRM analyses prior to the analyses of targeted peptides of small GTPases in order to calibrate for possible retention time shifts due to changes in chromatographic conditions. The prediction of empirical RT based on the individual iRT scores of the targeted small GTPase peptides was then determined by the linear

regression of RTs of BSA standard peptides obtained under the same chromatography conditions. This iRT-based predictor was examined between every six MRM runs by injecting another BSA reference peptide mixture to ensure precise RT prediction.

A total of 432 peptides representing 113 non-redundant or 131 isoform-specific small GTPases were monitored in each scheduled LC-MRM run. For SILAC labeling experiments, the LC-MRM method was further expanded into two runs for monitoring the precursor and fragment ions of peptides harboring the light and heavy forms of lysine and/or arginine. In this regard, three transitions were monitored for each light-/heavy-isotope-coded peptide for LC-MRM quantification. A complete list of all the transitions monitored in the SILAC labeling experiments is provided in **Supplementary Table S2A**. These targeted transitions were monitored in the scheduled MRM mode with a 6-min retention time duration.

All raw files were processed using Skyline (version 3.5) for the generation of extracted-ion chromatograms and peak integration. The targeted peptides were first manually checked to ensure the overlaid chromatographic profiles of multiple fragment ions derived from the light and heavy forms of the same peptide. The data were then processed to ensure that the distribution of the relative intensities of multiple transitions associated with the same precursor ion correlates with the theoretical distribution derived from the tandem mass spectra in the library. The sum of peak area from all transitions of light- or heavy-labeled peptides was used for the quantification. A complete list of all quantification data for the SILAC labeling experiments is available in **Supplementary Table S2B**.

**Construction and Transfection of FLAG-tagged Fusion Protein Expression Plasmid.** To generate expression plasmid for 3×FLAG-tagged RAB38, the full-length coding sequence of human *RAB38* gene was amplified by PCR using Phusion High-Fidelity DNA Polymerase (NEB).

The PCR product was digested with HindIII and EcoRI, and the resulting DNA fragment was inserted into p3×FLAG-CMV-10 (Sigma) to construct the plasmid. The sequence of the constructed plasmid was validated by Sanger sequencing.

For plasmid transfection, WM-115 cells were cultured in six-well plates and transfected at 70% confluency with either the p3×FLAG-CMV-10 empty vector or the FLAG-RAB38 plasmid using TransIT-2020 transfection reagent (Mirus Bio LLC) following the manufacturer's recommended protocol. Transfected cells were incubated for an additional 24 h and analyzed for gene expression of the relative targeted protein using immunoblotting with specific antibodies.

**siRNA Transfection.** siGENOME non-targeting (NT) siRNA control (D-001210-02-05) and RAB38 SMARTpool (L-010059-00-0005) siRNA were purchased from Dharmacon (Lafayette, CO). The non-targeting siRNA control was designed not to target any known genes in human, mouse or rat, as described by the manufacturer. Briefly, WM-266-4, IGR37 and M14 melanoma cells were cultured in six-well plates and transfected at 50% confluency with 100 nM non-targeting siRNA or RAB38-targeting siRNA using TransIT-X2 transfection reagent (Mirus Bio LLC) following the manufacturer's protocol. Transfected cells were incubated for an additional 48–72 h and analyzed for the expression level of the RAB38 protein using immunoblotting with specific antibodies.

**Real-time Quantitative PCR (RT-qPCR).** At 24-72 h following transfection, total RNA was extracted from the cells using the Total RNA Kit I (Omega Bio-Tech), and 1 µg of total RNA was reverse-transcribed to generate cDNA by using M-MLV reverse transcriptase (Promega) and an oligo(dT)<sub>16</sub> primer. Gene expression levels were evaluated by real-time quantitative PCR (RT-qPCR) using iQ SYBR Green Supermix kit (Bio-Rad) with 100 ng cDNA input in a 20-µL total reaction volume. The expression level of glyceraldehyde 3-phosphate dehydrogenase (*GAPDH*)

gene was used as an internal control for normalization. Oligonucleotide sequences of primer pairs used in the RT-qPCR experiments are listed in **Supplementary Table S1**. All primers were used at a final concentration of 500 nM. The relative gene expression was analyzed by the comparative cycle threshold ( $2^{-\Delta\Delta C_t}$ ) method.

1. Yocum AK, Chinnaiyan AM. Current affairs in quantitative targeted proteomics: multiple reaction monitoring-mass spectrometry. *Brief Funct Genomic Proteomic* **2009**;8:145-57
2. Escher C, Reiter L, MacLean B, Ossola R, Herzog F, Chilton J, *et al.* Using iRT, a normalized retention time for more targeted measurement of peptides. *Proteomics* **2012**;12:1111-21

**Table S1.** A complete list of primers used for real-time quantitative PCR (RT-qPCR) in this study.

| Primers               |     | Sequences                 |     | RefSeq accession numbers |
|-----------------------|-----|---------------------------|-----|--------------------------|
| GAPDH forward         | 5'- | TTAGCACCCCTGGCCAAGG       | -3' | NM_002046.5              |
| GAPDH reverse         |     | CTTACTCCTTGGAGGCCATG      |     | NM_002046.5              |
| RAB38 forward         |     | CATGAACAATGGCCTCAAGATG    |     | NM_022337                |
| RAB38 reverse         |     | CCATTAGGTCACACTCATTTC     |     | NM_022337                |
| MMP2 forward          |     | ACCCATTTACACCTACACCAAG    |     | NM_004530.5              |
| MMP2 reverse          |     | TGTTTGCAGATCTCAGGAGTG     |     | NM_004530.5              |
| MMP9 forward          |     | CGAACTTTGACAGCGACAAG      |     | NM_004994.2              |
| MMP9 reverse          |     | CACTGAGGAATGATCTAAGCCC    |     | NM_004994.2              |
| TBC1D16-47KDa forward |     | CGATTTTAAGATGAAGGTCG      |     | NM_001271846.1           |
| TBC1D16-47KDa reverse |     | TCAGGTGGTTGAGCCAG         |     | NM_001271846.1           |
| MITF-M forward        |     | CATTGTTATGCTGGAAATGCTAGAA |     | NM_000248.3              |
| MITF-M reverse        |     | GGCTTGCTGTATGTGGTACTTGG   |     | NM_000248.3              |

**Table S2.** A complete list of small GTPases of the Ras superfamily in the human proteome.

| IPI ID                             | Subfamily       | Full name                                                                 | Uniprot | MW     | gene name | other name     |             |
|------------------------------------|-----------------|---------------------------------------------------------------------------|---------|--------|-----------|----------------|-------------|
| IPI00930413, IPI00215914, IPI00930 | <b>Sar1/Arf</b> | ADP-ribosylation factor 1                                                 | P84077  | 20,697 | ARF1      |                | *Arf (27)   |
| IPI00797941, IPI00215917           | <b>Sar1/Arf</b> | ADP-ribosylation factor 3                                                 | P61204  | 20,601 | ARF3      |                | *Arf (27)   |
| IPI00792330, IPI00215918, IPI00946 | <b>Sar1/Arf</b> | ADP-ribosylation factor 4                                                 | P18085  | 20,511 | ARF4      | ARF2           | *Arf (27)   |
| IPI00215919, IPI00853337           | <b>Sar1/Arf</b> | ADP-ribosylation factor 5                                                 | P84085  | 20,530 | ARF5      |                | *Arf (27)   |
| IPI00215920                        | <b>Sar1/Arf</b> | ADP-ribosylation factor 6                                                 | P62330  | 20,082 | ARF6      |                | *Arf (27)   |
| IPI00028549, IPI00028547, IPI00914 | <b>Sar1/Arf</b> | ADP-ribosylation factor related protein 1                                 | Q13795  | 22,614 | ARFRP1    |                | *Arf (27)   |
| IPI00791961, IPI00219518           | <b>Sar1/Arf</b> | ADP-ribosylation factor-like 1                                            | P84077  | 20,697 | ARL1      |                | *Arf (27)   |
| IPI00167501                        | <b>Sar1/Arf</b> | ADP-ribosylation factor-like 10                                           | Q8N8L6  | 27,459 | ARL10     | ARL10A         | *Arf (27)   |
| IPI00056495                        | <b>Sar1/Arf</b> | ADP-ribosylation factor-like 11                                           | Q969Q4  | 21,391 | ARL11     |                | *Arf (27)   |
| IPI00472207, IPI00797369, IPI00945 | <b>Sar1/Arf</b> | ADP-ribosylation factor-like 13B                                          | Q3SXY8  | 48,643 | ARL13B    | ARL2L1         | *Arf (27)   |
| IPI00296664                        | <b>Sar1/Arf</b> | ADP-ribosylation factor-like 14 (FLJ22595)                                | Q8N4G2  | 21,588 | ARL14     | ARF7, FLJ22595 | *Arf (27)   |
| IPI00005163                        | <b>Sar1/Arf</b> | ADP-ribosylation factor-like protein 15                                   | Q9NXU5  | 22,876 | ARL15     | ARFRP2         | *Arf (27)   |
| IPI00793250, IPI00242972, IPI00792 | <b>Sar1/Arf</b> | ADP-ribosylation factor-like 16 (LOC339231)                               | Q0P5N6  | 20,936 | ARL16     | LOC339231      | *Arf (27)   |
| IPI00847722, IPI00003326           | <b>Sar1/Arf</b> | ADP-ribosylation factor-like 2                                            | P36404  | 20,878 | ARL2      |                | *Arf (27)   |
| IPI00003327                        | <b>Sar1/Arf</b> | ADP-ribosylation factor-like 3                                            | P36405  | 20,456 | ARL3      |                | *Arf (27)   |
| IPI00029596, IPI00893142, IPI00893 | <b>Sar1/Arf</b> | ADP-ribosylation factor-like 4A                                           | P40617  | 22,615 | ARL4A     | ARL4           | *Arf (27)   |
| IPI00936024, IPI00010149           | <b>Sar1/Arf</b> | ADP-ribosylation factor-like 4C                                           | P56559  | 21,487 | ARL4C     | ARL7           | *Arf (27)   |
| IPI00027971                        | <b>Sar1/Arf</b> | ADP-ribosylation factor-like 4D                                           | P49703  | 22,156 | ARL4D     | ARF4L          | *Arf (27)   |
| IPI00001923, IPI00924699, IPI00412 | <b>Sar1/Arf</b> | ADP-ribosylation factor-like 5A                                           | Q9Y689  | 20,728 | ARL5A     | ARL5           | *Arf (27)   |
| IPI00102036                        | <b>Sar1/Arf</b> | ADP-ribosylation factor-like 5B                                           | Q96KC2  | 20,375 | ARL5B     | ARL8           | *Arf (27)   |
| IPI00789499, IPI00946662, IPI00021 | <b>Sar1/Arf</b> | ADP-ribosylation factor-like 6                                            | Q9H0F7  | 21,097 | ARL6      |                | *Arf (27)   |
| IPI00060031                        | <b>Sar1/Arf</b> | ADP-ribosylation factor-like 8A                                           | Q96BM9  | 21,416 | ARL8A     | ARL10B         | *Arf (27)   |
| IPI00793455, IPI00788984, IPI00789 | <b>Sar1/Arf</b> | ADP-ribosylation factor-like 8B                                           | Q9NVJ2  | 21,539 | ARL8B     | ARL10C         | *Arf (27)   |
| IPI00419109                        | <b>Sar1/Arf</b> | ADP-ribosylation factor-like 9                                            | Q6T311  | 20,755 | ARL9      |                | *Arf (27)   |
| IPI00002919                        | <b>Ras</b>      | DIRAS family, GTP-binding RAS-like 1                                      | Q95057  | 22,329 | DIRAS1    |                | *Ras (36)   |
| IPI00063302                        | <b>Ras</b>      | DIRAS family, GTP-binding RAS-like 2                                      | Q96HU8  | 22,485 | DIRAS2    |                | *Ras (36)   |
| IPI00032112                        | <b>Ras</b>      | DIRAS family, GTP-binding RAS-like 3                                      | O95661  | 25,861 | DIRAS3    | NOEY2, RHOF    | *Ras (36)   |
| IPI00018593, IPI00220244, IPI00003 | <b>Sar1/Arf</b> | Tripartite motif-containing 23; E3 ubiquitin-protein ligase TRIM23        | P36406  | 64,067 | TRIM23    | ARD1, RNF46    | *Arf (27)   |
| IPI00375882                        | <b>Ras</b>      | ES cell expressed Ras                                                     | Q7Z444  | 25,287 | ERAS      | HRAS2          | *Ras (36)   |
| IPI00022710                        | <b>Ras</b>      | GTP binding protein overexpressed in skeletal muscle; GTP-binding protein | P55040  | 33,949 | GEM       | KIR            | *Ras (36)   |
| IPI00289912                        | <b>Ras</b>      | RAS (RAD and GEM)-like GTP-binding 1; GTP-binding protein REM 1           | O75628  | 32,947 | REM1      |                | *Ras (36)   |
| IPI00793200                        | <b>Ras</b>      | RAS (RAD and GEM)-like GTP-binding 2; GTP-binding protein REM 2           | Q81YK8  | 37,139 | REM2      |                | *Ras (36)   |
| IPI00922845, IPI00925921, IPI00011 | <b>Others</b>   | RAB, member RAS oncogene family-like 5                                    | Q9H7X7  | 20,835 | RABL5     | IFT22          | *Others (9) |
| IPI00916134, IPI00916779, IPI00221 | <b>Others</b>   | RAB, member of RAS oncogene family-like 2A                                | Q9UBK7  | 26,115 | RABL2A    |                | *Others (9) |
| IPI00916134, IPI00916779, IPI00924 | <b>Others</b>   | RAB, member of RAS oncogene family-like 2B                                | Q9UNT1  | 26,101 | RABL2B    |                | *Others (9) |
| IPI00946728, IPI00946067, IPI00946 | <b>Others</b>   | RAB, member of RAS oncogene family-like 3                                 | Q5HYI8  | 26,423 | RABL3     |                | *Others (9) |
| IPI00878639, IPI00879146, IPI00878 | <b>Rab</b>      | RAB, member of RAS oncogene family-like 4                                 | Q9BW83  | 20,480 | RABL4     | IFT27          | *Rab (61)   |
| IPI00016513                        | <b>Rab</b>      | RAB10, member RAS oncogene family                                         | P61026  | 22,541 | RAB10     |                | *Rab (61)   |
| IPI00795676, IPI00911020, IPI00941 | <b>Rab</b>      | RAB11A, member RAS oncogene family                                        | P62491  | 24,394 | RAB11A    | RAB11          | *Rab (61)   |
| IPI00930720, IPI00020436           | <b>Rab</b>      | RAB11B, member RAS oncogene family                                        | Q15907  | 24,489 | RAB11B    |                | *Rab (61)   |
| IPI00419932                        | <b>Rab</b>      | RAB12, member RAS oncogene family                                         | Q6IQ22  | 27,248 | RAB12     |                | *Rab (61)   |
| IPI00016373, IPI00877662           | <b>Rab</b>      | RAB13, member RAS oncogene family; similar to hCG24991                    | P51153  | 22,774 | RAB13     |                | *Rab (61)   |
| IPI00291928, IPI00646415           | <b>Rab</b>      | RAB14, member RAS oncogene family                                         | P61106  | 23,897 | RAB14     |                | *Rab (61)   |
| IPI00383449, IPI00394882           | <b>Rab</b>      | RAB15, member RAS oncogene family                                         | P59190  | 24,391 | RAB15     |                | *Rab (61)   |
| IPI00916806, IPI00007866, IPI00917 | <b>Rab</b>      | RAB17, member RAS oncogene family                                         | Q9H0T7  | 23,491 | RAB17     |                | *Rab (61)   |
| IPI00479988, IPI00478787, IPI00844 | <b>Rab</b>      | RAB18, member RAS oncogene family                                         | Q9NP72  | 22,977 | RAB18     |                | *Rab (61)   |
| IPI00478209, IPI00923598, IPI00946 | <b>Rab</b>      | RAB19, member RAS oncogene family                                         | A4D1S5  | 24,400 | RAB19     | RAB19B         | *Rab (61)   |
| IPI00185217, IPI00005719, IPI00917 | <b>Rab</b>      | RAB1A, member RAS oncogene family                                         | P62820  | 22,678 | RAB1A     |                | *Rab (61)   |
| IPI00008964, IPI00022134, IPI00896 | <b>Rab</b>      | RAB1B, member RAS oncogene family                                         | Q9H0U4  | 22,171 | RAB1B     |                | *Rab (61)   |
| IPI00015839                        | <b>Others</b>   | RAB20, member RAS oncogene family                                         | Q9NX57  | 26,277 | RAB20     |                | *Others (9) |
| IPI00790578, IPI00007755           | <b>Rab</b>      | RAB21, member RAS oncogene family                                         | Q9UL25  | 24,348 | RAB21     |                | *Rab (61)   |
| IPI00007756                        | <b>Rab</b>      | RAB22A, member RAS oncogene family                                        | Q9UL26  | 21,855 | RAB22A    | RAB22          | *Rab (61)   |
| IPI00080834                        | <b>Rab</b>      | RAB23, member RAS oncogene family                                         | Q9ULC3  | 26,659 | RAB23     |                | *Rab (61)   |
| IPI00383176, IPI00792833, IPI00396 | <b>Rab</b>      | RAB24, member RAS oncogene family                                         | Q969Q5  | 23,124 | RAB24     |                | *Rab (61)   |
| IPI00027993                        | <b>Rab</b>      | RAB25, member RAS oncogene family                                         | P57735  | 23,496 | RAB25     |                | *Rab (61)   |
| IPI00419883                        | <b>Rab</b>      | RAB26, member RAS oncogene family                                         | Q9ULW5  | 27,900 | RAB26     |                | *Rab (61)   |
| IPI00219858, IPI00016381           | <b>Rab</b>      | RAB27A, member RAS oncogene family                                        | P51159  | 24,868 | RAB27A    | RAB27          | *Rab (61)   |
| IPI00010491, IPI00643312           | <b>Rab</b>      | RAB27B, member RAS oncogene family                                        | O00194  | 24,608 | RAB27B    |                | *Rab (61)   |
| IPI00016377, IPI00929378, IPI00219 | <b>Rab</b>      | RAB28, member RAS oncogene family                                         | P51157  | 24,841 | RAB28     |                | *Rab (61)   |
| IPI00794027, IPI00790570, IPI00794 | <b>Rab</b>      | RAB2A, member RAS oncogene family                                         | P61019  | 23,546 | RAB2A     |                | *Rab (61)   |
| IPI00879279, IPI00064352, IPI00102 | <b>Rab</b>      | RAB2B, member RAS oncogene family                                         | Q8WUD1  | 24,214 | RAB2B     |                | *Rab (61)   |
| IPI00302030, IPI00425916           | <b>Rab</b>      | RAB30, member RAS oncogene family                                         | Q15771  | 23,058 | RAB30     |                | *Rab (61)   |
| IPI00646692, IPI00014376           | <b>Rab</b>      | RAB31, member RAS oncogene family                                         | Q13636  | 21,569 | RAB31     | RAB22B         | *Rab (61)   |
| IPI00014377                        | <b>Rab</b>      | RAB32, member RAS oncogene family                                         | Q13637  | 24,997 | RAB32     |                | *Rab (61)   |
| IPI00028517                        | <b>Rab</b>      | RAB33A, member RAS oncogene family                                        | Q14088  | 26,541 | RAB33A    |                | *Rab (61)   |
| IPI00021475                        | <b>Rab</b>      | RAB33B, member RAS oncogene family                                        | Q9H082  | 25,718 | RAB33B    |                | *Rab (61)   |
| IPI00795399, IPI00796900, IPI00790 | <b>Rab</b>      | RAB34, member RAS oncogene family                                         | Q9BZG1  | 29,044 | RAB34     | RAB39          | *Rab (61)   |
| IPI00032916, IPI00909855, IPI00879 | <b>Rab</b>      | RAB36, member RAS oncogene family                                         | O95755  | 36,322 | RAB36     |                | *Rab (61)   |
| IPI00332970, IPI00789993, IPI00788 | <b>Rab</b>      | RAB37, member RAS oncogene family                                         | Q96AX2  | 24,815 | RAB37     |                | *Rab (61)   |
| IPI00027981, IPI00939888           | <b>Rab</b>      | RAB38, member RAS oncogene family                                         | P57729  | 23,712 | RAB38     |                | *Rab (61)   |
| IPI00001618                        | <b>Rab</b>      | RAB39, member RAS oncogene family                                         | Q14964  | 25,007 | RAB39     | RAB39A         | *Rab (61)   |
| IPI00060801                        | <b>Rab</b>      | RAB39B, member RAS oncogene family                                        | Q96DA2  | 24,622 | RAB39B    |                | *Rab (61)   |
| IPI00023504                        | <b>Rab</b>      | RAB3A, member RAS oncogene family                                         | P20336  | 24,984 | RAB3A     |                | *Rab (61)   |
| IPI00300562                        | <b>Rab</b>      | RAB3B, member RAS oncogene family                                         | P20337  | 24,758 | RAB3B     |                | *Rab (61)   |
| IPI00061114, IPI00871276           | <b>Rab</b>      | RAB3C, member RAS oncogene family                                         | Q96E17  | 25,952 | RAB3C     |                | *Rab (61)   |
| IPI00032808                        | <b>Rab</b>      | RAB3D, member RAS oncogene family                                         | O95716  | 24,267 | RAB3D     |                | *Rab (61)   |
| IPI00514509                        | <b>Rab</b>      | RAB40A, member RAS oncogene family                                        | Q8WXH6  | 31,076 | RAB40A    |                | *Rab (61)   |
| IPI00009953, IPI00790429           | <b>Rab</b>      | RAB40B, member RAS oncogene family                                        | Q12829  | 30,956 | RAB40B    |                | *Rab (61)   |
| IPI00045478                        | <b>Rab</b>      | RAB40C, member RAS oncogene family                                        | Q96S21  | 31,304 | RAB40C    |                | *Rab (61)   |



|                                    |                      |                                                                                |         |        |         |              |  |             |
|------------------------------------|----------------------|--------------------------------------------------------------------------------|---------|--------|---------|--------------|--|-------------|
| IP100929731, IP100232898           | <b>Rab</b>           | RAB41, member RAS oncogene family                                              | Q5JT25  | 25,038 | RAB41   |              |  | *Rab (61)   |
| IP100843865                        | <b>Rab</b>           | RAB42, member RAS oncogene family                                              | Q8N4Z0  | 11,364 | RAB42   |              |  | *Rab (61)   |
| IP100329441, IP100789395, IP100744 | <b>Rab</b>           | RAB43, member RAS oncogene family; hypothetical LOC100131426                   | Q86YS6  | 23,339 | RAB43   | RAB41        |  | *Rab (61)   |
| IP100480056, IP100939242           | <b>Rab</b>           | RAB4A, member RAS oncogene family                                              | P20338  | 24,390 | RAB4A   |              |  | *Rab (61)   |
| IP100448725, IP100477489, IP100187 | <b>Rab</b>           | RAB4B, member RAS oncogene family                                              | P61018  | 23,587 | RAB4B   |              |  | *Rab (61)   |
| IP100924852, IP100797838, IP100927 | <b>Rab</b>           | RAB5A, member RAS oncogene family                                              | P20339  | 23,659 | RAB5A   |              |  | *Rab (61)   |
| IP100017344, IP100908835           | <b>Rab</b>           | RAB5B, member RAS oncogene family                                              | P61020  | 23,707 | RAB5B   |              |  | *Rab (61)   |
| IP100789439, IP100016339           | <b>Rab</b>           | RAB5C, member RAS oncogene family                                              | P51148  | 23,483 | RAB5C   |              |  | *Rab (61)   |
| IP100023526                        | <b>Rab</b>           | Ras-related protein Rab-6A                                                     | P20340  | 23,593 | RAB6A   | RAB6         |  | *Rab (61)   |
| IP100945534, IP100016891, IP100946 | <b>Rab</b>           | RAB6B, member RAS oncogene family                                              | Q9NRW1  | 23,462 | RAB6B   |              |  | *Rab (61)   |
| IP100023526, IP100748927, IP100030 | <b>Rab</b>           | RAB6C, member RAS oncogene family; RAB6A, member RAS oncogene                  | Q9H0N0  | 28,355 | RAB6C   |              |  | *Rab (61)   |
| IP100913930, IP100909756, IP100024 | <b>Rab</b>           | RAB7, member RAS oncogene family-like 1                                        | O14966  | 23,155 | RAB7L1  | RAB29        |  | *Rab (61)   |
| IP100946776, IP100016342, IP100945 | <b>Rab</b>           | RAB7A, member RAS oncogene family                                              | P51149  | 23,490 | RAB7A   |              |  | *Rab (61)   |
| IP100556414, IP100028481           | <b>Rab</b>           | RAB8A, member RAS oncogene family                                              | P61006  | 23,668 | RAB8A   | RAB8         |  | *Rab (61)   |
| IP100024282, IP100903040           | <b>Rab</b>           | RAB8B, member RAS oncogene family                                              | Q92930  | 23,584 | RAB8B   |              |  | *Rab (61)   |
| IP100016372                        | <b>Rab</b>           | RAB9A, member RAS oncogene family                                              | P51151  | 22,838 | RAB9A   |              |  | *Rab (61)   |
| IP100014603                        | <b>Rab</b>           | RAB9B, member RAS oncogene family                                              | Q9NP90  | 22,719 | RAB9B   |              |  | *Rab (61)   |
| IP100795671, IP100044779, IP100795 | <b>Ran</b>           | RAN, member RAS oncogene family                                                | P62826  | 24,423 | RAN     |              |  | *Ran (1)    |
| IP100019345, IP100877120           | <b>Ras</b>           | RAP1A, member of RAS oncogene family                                           | P62834  | 20,987 | RAP1A   |              |  | *Ras (36)   |
| IP100796349, IP100908754, IP100816 | <b>Ras</b>           | RAP1B, member of RAS oncogene family                                           | P61224  | 20,825 | RAP1B   |              |  | *Ras (36)   |
| IP100019346                        | <b>Ras</b>           | RAP2A, member of RAS oncogene family                                           | P10114  | 20,615 | RAP2A   |              |  | *Ras (36)   |
| IP100018364                        | <b>Ras</b>           | RAP2B, member of RAS oncogene family                                           | P61225  | 20,504 | RAP2B   |              |  | *Ras (36)   |
| IP100009607                        | <b>Ras</b>           | RAP2C, member of RAS oncogene family                                           | Q9Y3L5  | 20,745 | RAP2C   |              |  | *Ras (36)   |
| IP100412443, IP100043268           | <b>Ras</b>           | RAS and EF-hand domain containing                                              | Q8IZ41  | 82,879 | RASEF   | RAB45        |  | *Rab (61)   |
| IP100007111                        | <b>Ras</b>           | RAS, dexamethasone-induced 1                                                   | Q9Y272  | 31,642 | RASD1   | DexRas       |  | *Ras (36)   |
| IP100059267                        | <b>Ras</b>           | RAS-like, estrogen-regulated, growth inhibitor                                 | Q9H628  | 22,608 | RERG    |              |  | *Ras (36)   |
| IP100478878, IP100023219           | <b>Ras</b>           | RAS-like, family 10, member A                                                  | Q92737  | 22,541 | RASL10A | RRRP22       |  | *Ras (36)   |
| IP100045517                        | <b>Ras</b>           | RAS-like, family 10, member B                                                  | Q96579  | 23,229 | RASL10B |              |  | *Ras (36)   |
| IP100156120                        | <b>Ras</b>           | RAS-like, family 11, member A                                                  | Q6T310  | 27,006 | RASL11A |              |  | *Ras (36)   |
| IP100386910                        | <b>Ras</b>           | RAS-like, family 11, member B                                                  | Q9BPW5  | 27,508 | RASL11B |              |  | *Ras (36)   |
| IP100789503, IP100009813, IP100909 | <b>Ras</b>           | RAS-like, family 12                                                            | Q9NYN1  | 29,662 | RASL12  | RIS          |  | *Ras (36)   |
| IP100304150                        | <b>Ras</b>           | RASD family, member 2                                                          | Q96D21  | 30,366 | RASD2   | RHES         |  | *Ras (36)   |
| IP100015447                        | <b>Ras</b>           | RERG/RAS-like (FLJ22655)                                                       | Q9H628  | 23,855 | RERGL   | FLJ22655     |  | *Ras (36)   |
| IP100016669, IP100945356, IP100947 | <b>Ras</b>           | Ras homolog enriched in brain                                                  | Q15382  | 20,497 | RHEB    | RHEB1        |  | *Ras (36)   |
| IP100942159, IP100152059, IP100556 | <b>Ras</b>           | Ras homolog enriched in brain like 1                                           | Q8TAI7  | 20,682 | RHEBL1  | RHEB2        |  | *Ras (36)   |
| IP100639824, IP100144289           | <b>Ras</b>           | Ras-like without CAAX 1                                                        | Q92963  | 25,145 | RIT1    | ROC1         |  | *Ras (36)   |
| IP100163763, IP100289566           | <b>Ras</b>           | Ras-like without CAAX 2                                                        | Q99578  | 24,668 | RIT2    | ROC2         |  | *Ras (36)   |
| IP100375333                        | <b>Ras</b>           | Ras-related associated with diabetes                                           | A0A024R | 33,245 | RRAD    | RAD, REM3    |  | *Ras (36)   |
| IP100023211                        | <b>Rho/Rac/Cdc42</b> | Rho family GTPase 1                                                            | Q92730  | 26,056 | RND1    | RHO7         |  | *Rho (20)   |
| IP100001436                        | <b>Rho/Rac/Cdc42</b> | Rho family GTPase 2                                                            | P52198  | 25,369 | RND2    | RHO6, RHON   |  | *Rho (20)   |
| IP100917768, IP100916668, IP100908 | <b>Rho/Rac/Cdc42</b> | Rho family GTPase 3                                                            | P61587  | 27,368 | RND3    | ROHE         |  | *Rho (20)   |
| IP100001317                        | <b>Rho/Rac/Cdc42</b> | Rho-related BTB domain containing 1                                            | O94844  | 79,417 | RHOBTB1 |              |  | *Rho (20)   |
| IP100794883, IP100930055, IP100816 | <b>Rho/Rac/Cdc42</b> | Rho-related BTB domain containing 2                                            | Q9BYZ6  | 82,626 | RHOBTB2 |              |  | *Rho (20)   |
| IP100513941, IP100015954, IP100644 | <b>Sar1/Arf</b>      | SAR1 homolog A (S. cerevisiae)                                                 | Q9NR31  | 22,367 | SAR1A   |              |  | *Arf (27)   |
| IP100002149                        | <b>Sar1/Arf</b>      | SAR1 homolog B (S. cerevisiae)                                                 | Q9Y6B6  | 22,410 | SAR1B   |              |  | *Arf (27)   |
| IP100016786, IP100007189, IP100642 | <b>Rho/Rac/Cdc42</b> | cell division cycle 42 (GTP binding protein, 25kDa); cell division cycle 42 ps | P60953  | 21,259 | CDC42   |              |  | *Rho (20)   |
| IP100792754, IP100791074, IP100024 | <b>Ras</b>           | muscle RAS oncogene homolog                                                    | O14807  | 23,846 | MRAS    | RRAS3        |  | *Ras (36)   |
| IP100000005                        | <b>Ras</b>           | neuroblastoma RAS viral (v-ras) oncogene homolog                               | P01111  | 21,229 | NRAS    |              |  | *Ras (36)   |
| IP100925690, IP100926151, IP100410 | <b>Ras</b>           | NFKB inhibitor interacting Ras-like 1                                          | Q9NYS0  | 21,643 | NKIRAS1 |              |  | *Ras (36)   |
| IP100791151, IP100789320, IP100021 | <b>Ras</b>           | NFKB inhibitor interacting Ras-like 2                                          | Q9NYR9  | 21,508 | NKIRAS2 |              |  | *Ras (36)   |
| IP100926881, IP100478231, IP100926 | <b>Rho/Rac/Cdc42</b> | ras homolog gene family, member A                                              | P61586  | 21,768 | RHOA    |              |  | *Rho (20)   |
| IP100893313, IP100000041           | <b>Rho/Rac/Cdc42</b> | ras homolog gene family, member B                                              | P62745  | 22,123 | RHOB    |              |  | *Rho (20)   |
| IP100647268, IP100644425, IP100643 | <b>Rho/Rac/Cdc42</b> | ras homolog gene family, member C                                              | P08134  | 22,006 | RHOC    |              |  | *Rho (20)   |
| IP100010841                        | <b>Rho/Rac/Cdc42</b> | ras homolog gene family, member D                                              | O00212  | 23,413 | RHOD    |              |  | *Rho (20)   |
| IP100382965, IP100307458           | <b>Rho/Rac/Cdc42</b> | ras homolog gene family, member F (in filopodia)                               | Q9HBH0  | 23,625 | RHOF    | RIF          |  | *Rho (20)   |
| IP100017342                        | <b>Rho/Rac/Cdc42</b> | ras homolog gene family, member G (rho G)                                      | P84095  | 21,309 | RHOG    |              |  | *Rho (20)   |
| IP100018882                        | <b>Rho/Rac/Cdc42</b> | ras homolog gene family, member H                                              | Q15669  | 21,331 | RHOH    |              |  | *Rho (20)   |
| IP100249526, IP100027952           | <b>Rho/Rac/Cdc42</b> | ras homolog gene family, member J                                              | Q9H4E5  | 23,821 | RHOJ    | TCL, RHOT, R |  | *Rho (20)   |
| IP100880127, IP100012511           | <b>Rho/Rac/Cdc42</b> | ras homolog gene family, member Q; similar to small GTP binding protein 1      | P17081  | 22,659 | RHOQ    | TC10, RASL7A |  | *Rho (20)   |
| IP100759627, IP100217536, IP100759 | <b>Others</b>        | ras homolog gene family, member T1                                             | Q8IXI2  | 70,784 | RHOT1   | Miro-1       |  | *Others (9) |
| IP100465059, IP100647917           | <b>Others</b>        | ras homolog gene family, member T2                                             | Q8IXI1  | 68,118 | RHOT2   | Miro-2       |  | *Others (9) |
| IP100889079, IP100009644           | <b>Rho/Rac/Cdc42</b> | ras homolog gene family, member U                                              | Q7L0Q8  | 28,218 | RHOV    | WRCH1        |  | *Rho (20)   |
| IP100154827, IP100844512           | <b>Rho/Rac/Cdc42</b> | ras homolog gene family, member V                                              | Q96L33  | 26,217 | RHOV    | WRCH2        |  | *Rho (20)   |
| IP100394837, IP100219675, IP100555 | <b>Rho/Rac/Cdc42</b> | ras-related C3 botulinum toxin substrate 1 (rho family, small GTP binding p    | P63000  | 21,450 | RAC1    |              |  | *Rho (20)   |
| IP100877816, IP100877663, IP100010 | <b>Rho/Rac/Cdc42</b> | ras-related C3 botulinum toxin substrate 2 (rho family, small GTP binding p    | P15153  | 21,429 | RAC2    |              |  | *Rho (20)   |
| IP100023138                        | <b>Rho/Rac/Cdc42</b> | ras-related C3 botulinum toxin substrate 3 (rho family, small GTP binding p    | P60763  | 21,379 | RAC3    |              |  | *Rho (20)   |
| IP100020418                        | <b>Ras</b>           | related RAS viral (v-ras) oncogene homolog                                     | P10301  | 23,480 | RRAS    |              |  | *Ras (36)   |
| IP100012512, IP100856004           | <b>Ras</b>           | related RAS viral (v-ras) oncogene homolog 2; similar to related RAS viral     | P62070  | 23,400 | RRAS2   | TC21         |  | *Ras (36)   |
| IP100797747, IP100947333, IP100295 | <b>Others</b>        | signal recognition particle receptor, B subunit                                | Q9Y5M8  | 29,702 | SRPRB   |              |  | *Others (9) |
| IP100791123, IP100300096, IP100910 | <b>Rab</b>           | similar to hCG1778032; RAB35, member RAS oncogene family                       | Q15286  | 23,025 | RAB35   | RAB1C        |  | *Rab (61)   |
| IP100741763, IP100000006, IP100796 | <b>Ras</b>           | v-Ha-ras Harvey rat sarcoma viral oncogene homolog                             | X5D945  | 21,298 | HRAS    |              |  | *Ras (36)   |
| IP100423568, IP100791238, IP100423 | <b>Ras</b>           | v-Ki-ras2 Kirsten rat sarcoma viral oncogene homolog                           | P01116  | 21,656 | KRAS    |              |  | *Ras (36)   |
| IP100927712, IP100217519, IP100927 | <b>Ras</b>           | v-ral simian leukemia viral oncogene homolog A (ras related)                   | P11233  | 23,567 | RALA    |              |  | *Ras (36)   |
| IP100925885, IP100004397, IP100927 | <b>Ras</b>           | v-ral simian leukemia viral oncogene homolog B (ras related; GTP binding       | P11234  | 23,409 | RALB    |              |  | *Ras (36)   |

**Table S3A.** A complete list of small GTPases in the Skyline MRM library with their gene names, IPI numbers, and targeted peptides and transitions.

| Gene Name                   | Detailed description of targeted proteins, peptides and transitions used for Skyline library and LC-MRM analysis |                                                                                                    |                                                       |
|-----------------------------|------------------------------------------------------------------------------------------------------------------|----------------------------------------------------------------------------------------------------|-------------------------------------------------------|
| <b>NRAS</b>                 | <b>IPI: IPI00000005.1   SWISS-PROT: P01111   NRAS GTPase NRas</b>                                                |                                                                                                    |                                                       |
|                             | R.TGEGFLC <b>V</b> FAINNS <b>K</b> .S [73, 87]                                                                   | K.SFADINLY <b>R</b> .E [88, 96]                                                                    | R.QGVEDAFYTL <b>V</b> R.E [149, 160]                  |
|                             | 828.9061++                                                                                                       | 549.7826++                                                                                         | 699.3566++                                            |
|                             | C [y9] - 1052.5193+ (rank 2)                                                                                     | A [y7] - 864.4574+ (rank 1)                                                                        | A [y7] - 869.4880+ (rank 3)                           |
|                             | F [y7] - 793.4203+ (rank 1)                                                                                      | D [y6] - 793.4203+ (rank 2)                                                                        | F [y6] - 798.4509+ (rank 1)                           |
|                             | A [y6] - 646.3519+ (rank 3)                                                                                      | N [y4] - 565.3093+ (rank 3)                                                                        | Y [y5] - 651.3824+ (rank 2)                           |
|                             | 832.9132++ (heavy)                                                                                               | 552.7926++ (heavy)                                                                                 | 702.3667++ (heavy)                                    |
|                             | C [y9] - 1060.5335+ (rank 2)                                                                                     | A [y7] - 870.4775+ (rank 1)                                                                        | A [y7] - 875.5081+ (rank 3)                           |
|                             | F [y7] - 801.4345+ (rank 1)                                                                                      | D [y6] - 799.4404+ (rank 2)                                                                        | F [y6] - 804.4710+ (rank 1)                           |
|                             | A [y6] - 654.3661+ (rank 3)                                                                                      | N [y4] - 571.3294+ (rank 3)                                                                        | Y [y5] - 657.4026+ (rank 2)                           |
| <b>HRAS</b>                 | <b>IPI: IPI00000006.1   SWISS-PROT: P01112   HRAS GTPase HRas</b>                                                |                                                                                                    |                                                       |
|                             | R.TGEGFLC <b>V</b> FAINNT <b>K</b> .S [73, 87]                                                                   | K.SFEDIHQY <b>R</b> .E [88, 96]                                                                    | R.SYGIPYIETSA <b>K</b> .T [135, 146]                  |
|                             | 835.9140++                                                                                                       | 597.7805++                                                                                         | 664.8403++                                            |
|                             | C [y9] - 1066.5350+ (rank 1)                                                                                     | E [y7] - 960.4534+ (rank 1)                                                                        | G [y10] - 1078.5779+ (rank 2)                         |
|                             | F [y7] - 807.4359+ (rank 2)                                                                                      | I [y5] - 716.3838+ (rank 3)                                                                        | P [y8] - 908.4724+ (rank 1)                           |
|                             | A [y6] - 660.3675+ (rank 3)                                                                                      | H [y4] - 603.2998+ (rank 2)                                                                        | I [y6] - 648.3563+ (rank 3)                           |
|                             | 839.9211++ (heavy)                                                                                               | 600.7906++ (heavy)                                                                                 | 668.8474++ (heavy)                                    |
|                             | C [y9] - 1074.5492+ (rank 1)                                                                                     | E [y7] - 966.4735+ (rank 1)                                                                        | G [y10] - 1086.5921+ (rank 2)                         |
|                             | F [y7] - 815.4501+ (rank 2)                                                                                      | I [y5] - 722.4040+ (rank 3)                                                                        | P [y8] - 916.4866+ (rank 1)                           |
|                             | A [y6] - 668.3817+ (rank 3)                                                                                      | H [y4] - 609.3199+ (rank 2)                                                                        | I [y6] - 656.3705+ (rank 3)                           |
|                             |                                                                                                                  | 398.8561+++                                                                                        |                                                       |
|                             |                                                                                                                  | I [y5] - 716.3838+ (rank 3)                                                                        |                                                       |
|                             |                                                                                                                  | H [y4] - 603.2998+ (rank 1)                                                                        |                                                       |
|                             |                                                                                                                  | Q [y3] - 466.2409+ (rank 2)                                                                        |                                                       |
|                             |                                                                                                                  | 400.8628+++ (heavy)                                                                                |                                                       |
|                             | I [y5] - 722.4040+ (rank 3)                                                                                      |                                                                                                    |                                                       |
|                             | H [y4] - 609.3199+ (rank 1)                                                                                      |                                                                                                    |                                                       |
|                             | Q [y3] - 472.2610+ (rank 2)                                                                                      |                                                                                                    |                                                       |
| <b>RHOB</b>                 | <b>IPI: IPI00000041.1   SWISS-PROT: P62745   RHOB Rho-related GTP-binding protein RhoB</b>                       |                                                                                                    |                                                       |
|                             | K.LVVVGDGAC <b>G</b> K.T [7, 17]                                                                                 | K.DEFPEVYVPTVFENYVADIEVD <b>G</b> K.Q [25, 35]                                                     | R.IQAYDYLE <b>C</b> SA <b>K</b> .T [150, 161]         |
|                             | 537.7842++                                                                                                       | 925.4410+++                                                                                        | 730.8399++                                            |
|                             | V [y9] - 862.4087+ (rank 4)                                                                                      | V [y9] - 945.4888+ (rank 1)                                                                        | Y [y9] - 1148.4929+ (rank 3)                          |
|                             | V [y8] - 763.3403+ (rank 3)                                                                                      | A [y8] - 846.4203+ (rank 2)                                                                        | D [y8] - 985.4295+ (rank 2)                           |
|                             | G [y7] - 664.2719+ (rank 1)                                                                                      | D [y7] - 775.3832+ (rank 3)                                                                        | Y [y7] - 870.4026+ (rank 4)                           |
|                             | 541.7913++ (heavy)                                                                                               | 928.1124+++ (heavy)                                                                                | 734.8470++ (heavy)                                    |
|                             | V [y9] - 870.4229+ (rank 4)                                                                                      | V [y9] - 953.5030+ (rank 1)                                                                        | Y [y9] - 1156.5071+ (rank 3)                          |
|                             | V [y8] - 771.3545+ (rank 3)                                                                                      | A [y8] - 854.4345+ (rank 2)                                                                        | D [y8] - 993.4437+ (rank 2)                           |
|                             | G [y7] - 672.2861+ (rank 1)                                                                                      | D [y7] - 783.3974+ (rank 3)                                                                        | Y [y7] - 878.4168+ (rank 4)                           |
|                             | R.EVFETAT <b>R</b> .A [168, 175]                                                                                 |                                                                                                    |                                                       |
|                             | 476.7404++                                                                                                       |                                                                                                    |                                                       |
|                             | F [y6] - 724.3624+ (rank 1)                                                                                      |                                                                                                    |                                                       |
|                             | E [y5] - 577.2940+ (rank 3)                                                                                      |                                                                                                    |                                                       |
|                             | T [y4] - 448.2514+ (rank 2)                                                                                      |                                                                                                    |                                                       |
| 479.7504++ (heavy)          |                                                                                                                  |                                                                                                    |                                                       |
| F [y6] - 730.3826+ (rank 1) |                                                                                                                  |                                                                                                    |                                                       |
| E [y5] - 583.3141+ (rank 3) |                                                                                                                  |                                                                                                    |                                                       |
| T [y4] - 454.2716+ (rank 2) |                                                                                                                  |                                                                                                    |                                                       |
| <b>RND3</b>                 | <b>IPI: IPI00001437.3   SWISS-PROT: P61587   RND3 Rho-related GTP-binding protein RhoE</b>                       |                                                                                                    |                                                       |
|                             | K.IVVVGD <b>S</b> Q <b>C</b> G <b>K</b> .T [25, 35]                                                              | K.TALLHV <b>F</b> A <b>K</b> .D [36, 44]                                                           | K.GEIQEF <b>C</b> P <b>N</b> T <b>K</b> .M [118, 128] |
|                             | 581.3003++                                                                                                       | 500.3029++                                                                                         | 661.8059++                                            |
|                             | V [y9] - 949.4408+ (rank 2)                                                                                      | L [y7] - 827.5138+ (rank 3)                                                                        | I [y9] - 1136.5405+ (rank 1)                          |
|                             | V [y8] - 850.3723+ (rank 3)                                                                                      | L [y6] - 714.4297+ (rank 2)                                                                        | E [y7] - 895.3978+ (rank 4)                           |
|                             | G [y7] - 751.3039+ (rank 1)                                                                                      | H [y5] - 601.3457+ (rank 1)                                                                        | P [y4] - 459.2562+ (rank 3)                           |
|                             | 585.3074++ (heavy)                                                                                               | 504.3100++ (heavy)                                                                                 | 665.8130++ (heavy)                                    |
|                             | V [y9] - 957.4550+ (rank 2)                                                                                      | L [y7] - 835.5280+ (rank 3)                                                                        | I [y9] - 1144.5547+ (rank 1)                          |
|                             | V [y8] - 858.3865+ (rank 3)                                                                                      | L [y6] - 722.4439+ (rank 2)                                                                        | E [y7] - 903.4120+ (rank 4)                           |
|                             | G [y7] - 759.3181+ (rank 1)                                                                                      | H [y5] - 609.3599+ (rank 1)                                                                        | P [y4] - 467.2704+ (rank 3)                           |
|                             | R.TDVSTLVELSN <b>H</b> R.Q [140, 152]                                                                            | R.DIFHVATL <b>A</b> C <b>V</b> N <b>K</b> .T [187, 199]                                            |                                                       |
|                             | 735.8810++                                                                                                       | 744.3874++                                                                                         |                                                       |
|                             | L [y8] - 967.5320+ (rank 3)                                                                                      | V [y9] - 975.5292+ (rank 2)                                                                        |                                                       |
|                             | V [y7] - 854.4479+ (rank 1)                                                                                      | A [y8] - 876.4608+ (rank 1)                                                                        |                                                       |
|                             | E [y6] - 755.3795+ (rank 2)                                                                                      | T [y7] - 805.4236+ (rank 3)                                                                        |                                                       |
| 738.8911++ (heavy)          | 748.3945++ (heavy)                                                                                               |                                                                                                    |                                                       |
| L [y8] - 973.5521+ (rank 3) | V [y9] - 983.5434+ (rank 2)                                                                                      |                                                                                                    |                                                       |
| V [y7] - 860.4680+ (rank 1) | A [y8] - 884.4750+ (rank 1)                                                                                      |                                                                                                    |                                                       |
| E [y6] - 761.3996+ (rank 2) | T [y7] - 813.4378+ (rank 3)                                                                                      |                                                                                                    |                                                       |
| <b>RAB39</b>                | <b>IPI: IPI00001618.2   SWISS-PROT: Q14964   RAB39 Ras-related protein Rab-39A</b>                               |                                                                                                    |                                                       |
|                             | R.LIVIGDSTV <b>G</b> K.S [10, 20]                                                                                | R. <b>I</b> K <b>L</b> Q <b>L</b> W <b>D</b> T <b>A</b> G <b>Q</b> R <b>F</b> .F [61, 73] (missed) | K.LQLWDTAG <b>Q</b> R <b>F</b> .F [63, 73]            |
| 551.3293++                  | 779.4228++                                                                                                       | 658.8333++                                                                                         |                                                       |

|               |                                                                                                                |  |                              |  |                                 |
|---------------|----------------------------------------------------------------------------------------------------------------|--|------------------------------|--|---------------------------------|
|               | V [y9] - 875.4833+ (rank 1)                                                                                    |  | L [y9] - 1075.5167+ (rank 3) |  | L [y9] - 1075.5167+ (rank 1)    |
|               | I [y8] - 776.4149+ (rank 3)                                                                                    |  | W [y8] - 962.4326+ (rank 1)  |  | W [y8] - 962.4326+ (rank 2)     |
|               | G [y7] - 663.3308+ (rank 2)                                                                                    |  | T [y6] - 661.3264+ (rank 2)  |  | D [y7] - 776.3533+ (rank 3)     |
|               | 555.3364++ (heavy)                                                                                             |  | 786.4400++ (heavy)           |  | 661.8434++ (heavy)              |
|               | V [y9] - 883.4975+ (rank 1)                                                                                    |  | L [y9] - 1081.5368+ (rank 3) |  | L [y9] - 1081.5368+ (rank 1)    |
|               | I [y8] - 784.4291+ (rank 3)                                                                                    |  | W [y8] - 968.4528+ (rank 1)  |  | W [y8] - 968.4528+ (rank 2)     |
|               | G [y7] - 671.3450+ (rank 2)                                                                                    |  | T [y6] - 667.3465+ (rank 2)  |  | D [y7] - 782.3735+ (rank 3)     |
|               |                                                                                                                |  | 519.9510+++                  |  |                                 |
|               |                                                                                                                |  | D [y7] - 776.3533+ (rank 3)  |  |                                 |
|               |                                                                                                                |  | G [y4] - 489.2416+ (rank 1)  |  |                                 |
|               |                                                                                                                |  | E [y2] - 304.1615+ (rank 5)  |  |                                 |
|               |                                                                                                                |  | 524.6291+++ (heavy)          |  |                                 |
|               |                                                                                                                |  | D [y7] - 782.3735+ (rank 3)  |  |                                 |
|               |                                                                                                                |  | G [y4] - 495.2617+ (rank 1)  |  |                                 |
|               |                                                                                                                |  | E [y2] - 310.1817+ (rank 5)  |  |                                 |
| <b>ARL5A</b>  | <b>IPI:IP100001923.5 REFSEQ:NP_001032251;NP_817114 ARL5A ADP-ribosylation factor-like protein 5A isoform 2</b> |  |                              |  |                                 |
|               | R.FLMWDIGGQESLR.S [24, 36]                                                                                     |  | K.MLAHEDLR.K [71, 78]        |  | K.AGLLIFANK.Q [80, 88]          |
|               | 776.3849++                                                                                                     |  | 492.7502++                   |  | 473.7897++                      |
|               | D [y9] - 974.4901+ (rank 3)                                                                                    |  | L [y7] - 853.4526+ (rank 5)  |  | I [y5] - 592.3453+ (rank 2)     |
|               | I [y8] - 859.4632+ (rank 2)                                                                                    |  | A [y6] - 740.3686+ (rank 2)  |  | F [y4] - 479.2613+ (rank 1)     |
|               | G [y7] - 746.3791+ (rank 1)                                                                                    |  | H [y5] - 669.3315+ (rank 3)  |  | A [y3] - 332.1928+ (rank 4)     |
|               | 779.3949++ (heavy)                                                                                             |  | 495.7603++ (heavy)           |  | 477.7968++ (heavy)              |
|               | D [y9] - 980.5103+ (rank 3)                                                                                    |  | L [y7] - 859.4728+ (rank 5)  |  | I [y5] - 600.3595+ (rank 2)     |
|               | I [y8] - 865.4833+ (rank 2)                                                                                    |  | A [y6] - 746.3887+ (rank 2)  |  | F [y4] - 487.2755+ (rank 1)     |
|               | G [y7] - 752.3993+ (rank 1)                                                                                    |  | H [y5] - 675.3516+ (rank 3)  |  | A [y3] - 340.2070+ (rank 4)     |
| <b>SAR1B</b>  | <b>IPI:IP100002149.1 SWISS-PROT:Q9Y6B6 SAR1B GTP-binding protein SAR1b</b>                                     |  |                              |  |                                 |
|               | K.IDRPEAISEER.L [135, 145]                                                                                     |  | R.EMFGLYGQTTGK.G [148, 159]  |  | K.ELNARPLEVFMCSVLK.R [166, 181] |
|               | 657.8360++                                                                                                     |  | 666.3186++                   |  | 953.4999++                      |
|               | P [y8] - 930.4527+ (rank 1)                                                                                    |  | G [y9] - 924.4785+ (rank 3)  |  | M [y6] - 737.3684+ (rank 3)     |
|               | A [y6] - 704.3573+ (rank 3)                                                                                    |  | Y [y7] - 754.3730+ (rank 1)  |  | C [y5] - 606.3280+ (rank 2)     |
|               | S [y4] - 520.2362+ (rank 4)                                                                                    |  | G [y6] - 591.3097+ (rank 2)  |  | S [y4] - 446.2973+ (rank 5)     |
|               | 663.8562++ (heavy)                                                                                             |  | 670.3257++ (heavy)           |  | 960.5171++ (heavy)              |
|               | P [y8] - 936.4728+ (rank 1)                                                                                    |  | G [y9] - 932.4927+ (rank 3)  |  | M [y6] - 745.3826+ (rank 3)     |
|               | A [y6] - 710.3775+ (rank 3)                                                                                    |  | Y [y7] - 762.3872+ (rank 1)  |  | C [y5] - 614.3422+ (rank 2)     |
|               | S [y4] - 526.2563+ (rank 4)                                                                                    |  | G [y6] - 599.3239+ (rank 2)  |  | S [y4] - 454.3115+ (rank 5)     |
|               | 438.8931+++                                                                                                    |  |                              |  |                                 |
|               | I [y5] - 633.3202+ (rank 4)                                                                                    |  |                              |  |                                 |
|               | S [y4] - 520.2362+ (rank 1)                                                                                    |  |                              |  |                                 |
|               | E [y3] - 433.2041+ (rank 2)                                                                                    |  |                              |  |                                 |
|               | 442.9065+++ (heavy)                                                                                            |  |                              |  |                                 |
|               | I [y5] - 639.3404+ (rank 4)                                                                                    |  |                              |  |                                 |
|               | S [y4] - 526.2563+ (rank 1)                                                                                    |  |                              |  |                                 |
|               | E [y3] - 439.2243+ (rank 2)                                                                                    |  |                              |  |                                 |
| <b>RABL2A</b> | <b>IPI:IP100002644.1 SWISS-PROT:Q9UBK7-1 RABL2A Isoform 1 of Rab-like protein 2A</b>                           |  |                              |  |                                 |
|               | K.TKPSELDDQGGK.Y [5, 14]                                                                                       |  | K.IICLGDSAVGK.S [23, 33]     |  | R.NLSTWYTELR.E [110, 119]       |
|               | 368.1961+++                                                                                                    |  | 566.8052++                   |  | 641.8250++                      |
|               | L [y5] - 560.3039+ (rank 4)                                                                                    |  | C [y9] - 906.4349+ (rank 1)  |  | S [y8] - 1055.5156+ (rank 1)    |
|               | D [y4] - 447.2198+ (rank 1)                                                                                    |  | L [y8] - 746.4043+ (rank 3)  |  | T [y7] - 968.4836+ (rank 2)     |
|               | Q [y3] - 332.1928+ (rank 3)                                                                                    |  | G [y7] - 633.3202+ (rank 2)  |  | W [y6] - 867.4359+ (rank 3)     |
|               | 373.5389+++ (heavy)                                                                                            |  | 570.8123++ (heavy)           |  | 644.8350++ (heavy)              |
|               | L [y5] - 568.3181+ (rank 4)                                                                                    |  | C [y9] - 914.4491+ (rank 1)  |  | S [y8] - 1061.5358+ (rank 1)    |
|               | D [y4] - 455.2340+ (rank 1)                                                                                    |  | L [y8] - 754.4185+ (rank 3)  |  | T [y7] - 974.5037+ (rank 2)     |
|               | Q [y3] - 340.2070+ (rank 3)                                                                                    |  | G [y7] - 641.3344+ (rank 2)  |  | W [y6] - 873.4561+ (rank 3)     |
|               | R.EFRPEIPCIVVANK.I [120, 133]                                                                                  |  |                              |  |                                 |
|               | 836.4480++                                                                                                     |  |                              |  |                                 |
|               | E [y10] - 1142.6238+ (rank 1)                                                                                  |  |                              |  |                                 |
|               | V [y4] - 431.2613+ (rank 4)                                                                                    |  |                              |  |                                 |
|               | A [y3] - 332.1928+ (rank 2)                                                                                    |  |                              |  |                                 |
|               | 843.4651++ (heavy)                                                                                             |  |                              |  |                                 |
|               | E [y10] - 1150.6380+ (rank 1)                                                                                  |  |                              |  |                                 |
|               | V [y4] - 439.2755+ (rank 4)                                                                                    |  |                              |  |                                 |
|               | A [y3] - 340.2070+ (rank 2)                                                                                    |  |                              |  |                                 |
| <b>DIRAS1</b> | <b>IPI:IP100002919.2 SWISS-PROT:O95057 DIRAS1 GTP-binding protein Di-Ras1</b>                                  |  |                              |  |                                 |
|               | R.VVVFAGGGVVGK.S [9, 19]                                                                                       |  | R.DTYIPTIEDTYR.Q [33, 44]    |  | K.GSVEDIPVMLVGNK.C [108, 121]   |
|               | 495.2926++                                                                                                     |  | 743.8566++                   |  | 729.3871++                      |
|               | V [y9] - 791.4410+ (rank 2)                                                                                    |  | I [y9] - 1107.5681+ (rank 3) |  | P [y8] - 857.4913+ (rank 1)     |
|               | F [y8] - 692.3726+ (rank 1)                                                                                    |  | P [y8] - 994.4840+ (rank 1)  |  | M [y6] - 661.3702+ (rank 4)     |
|               | G [y7] - 545.3042+ (rank 3)                                                                                    |  | E [y5] - 683.2995+ (rank 2)  |  | V [y4] - 417.2456+ (rank 2)     |
|               | 499.2997++ (heavy)                                                                                             |  | 746.8667++ (heavy)           |  | 733.3942++ (heavy)              |
|               | V [y9] - 799.4552+ (rank 2)                                                                                    |  | I [y9] - 1113.5882+ (rank 3) |  | P [y8] - 865.5055+ (rank 1)     |
|               | F [y8] - 700.3868+ (rank 1)                                                                                    |  | P [y8] - 1000.5041+ (rank 1) |  | M [y6] - 669.3844+ (rank 4)     |
|               | G [y7] - 553.3184+ (rank 3)                                                                                    |  | E [y5] - 689.3196+ (rank 2)  |  | V [y4] - 425.2598+ (rank 2)     |
|               | R.EAQAVAQEWK.C [133, 142]                                                                                      |  |                              |  |                                 |
|               | 580.2907++                                                                                                     |  |                              |  |                                 |
|               | A [y7] - 831.4359+ (rank 2)                                                                                    |  |                              |  |                                 |
|               | V [y6] - 760.3988+ (rank 3)                                                                                    |  |                              |  |                                 |
|               | A [y5] - 661.3304+ (rank 1)                                                                                    |  |                              |  |                                 |



|               |                                                                                     |  |                                  |  |                                  |
|---------------|-------------------------------------------------------------------------------------|--|----------------------------------|--|----------------------------------|
|               | I [y7] - 826.4305+ (rank 2)                                                         |  | T [y6] - 779.3617+ (rank 3)      |  | V [y8] - 901.5102+ (rank 2)      |
|               | S [y6] - 713.3464+ (rank 1)                                                         |  | H [y4] - 541.2551+ (rank 2)      |  | G [y7] - 802.4417+ (rank 1)      |
|               | 661.3492++ (heavy)                                                                  |  | 706.3552++ (heavy)               |  | 739.9373++ (heavy)               |
|               | L [y9] - 1060.6128+ (rank 3)                                                        |  | P [y9] - 1126.5553+ (rank 1)     |  | L [y9] - 1020.6143+ (rank 3)     |
|               | I [y7] - 834.4447+ (rank 2)                                                         |  | T [y6] - 787.3759+ (rank 3)      |  | V [y8] - 907.5303+ (rank 2)      |
|               | S [y6] - 721.3606+ (rank 1)                                                         |  | H [y4] - 549.2693+ (rank 2)      |  | G [y7] - 808.4619+ (rank 1)      |
| <b>RAB21</b>  | <b>IPI: IPI00007755.3   SWISS-PROT: Q9UL25   RAB21 Ras-related protein Rab-21</b>   |  |                                  |  |                                  |
|               | K.VVLLGEGCVGK.T [21, 31]                                                            |  | R.VNLAIWDTAGQER.F [67, 79]       |  | R.HVSIQEAESYAESVGAH.H [140, 156] |
|               | 565.8155++                                                                          |  | 736.8782++                       |  | 902.9392++                       |
|               | L [y9] - 932.4870+ (rank 2)                                                         |  | W [y8] - 962.4326+ (rank 1)      |  | Q [y13] - 1368.6278+ (rank 3)    |
|               | L [y8] - 819.4029+ (rank 3)                                                         |  | D [y7] - 776.3533+ (rank 2)      |  | E [y12] - 1240.5692+ (rank 2)    |
|               | G [y7] - 706.3189+ (rank 1)                                                         |  | G [y4] - 489.2416+ (rank 3)      |  | A [y11] - 1111.5266+ (rank 1)    |
|               | 569.8226++ (heavy)                                                                  |  | 739.8883++ (heavy)               |  | 906.9463++ (heavy)               |
|               | L [y9] - 940.5012+ (rank 2)                                                         |  | W [y8] - 968.4528+ (rank 1)      |  | Q [y13] - 1376.6420+ (rank 3)    |
|               | L [y8] - 827.4171+ (rank 3)                                                         |  | D [y7] - 782.3735+ (rank 2)      |  | E [y12] - 1248.5834+ (rank 2)    |
|               | G [y7] - 714.3330+ (rank 1)                                                         |  | G [y4] - 495.2617+ (rank 3)      |  | A [y11] - 1119.5408+ (rank 1)    |
| <b>RAB22A</b> | <b>IPI: IPI00007756.1   SWISS-PROT: Q9UL26   RAB22A Ras-related protein Rab-22A</b> |  |                                  |  |                                  |
|               | K.TVQYQNELHK.F [45, 54]                                                             |  | K.EETFSTLKN.N [89, 96]           |  | K.DYADSIHAIFVETSAK.N [134, 149]  |
|               | 630.3226++                                                                          |  | 477.7426++                       |  | 883.9334++                       |
|               | Q [y8] - 1059.5218+ (rank 3)                                                        |  | T [y6] - 696.3927+ (rank 4)      |  | H [y10] - 1102.5891+ (rank 1)    |
|               | Y [y7] - 931.4632+ (rank 1)                                                         |  | F [y5] - 595.3450+ (rank 3)      |  | A [y9] - 965.5302+ (rank 2)      |
|               | N [y5] - 640.3413+ (rank 4)                                                         |  | S [y4] - 448.2766+ (rank 1)      |  | F [y7] - 781.4090+ (rank 3)      |
|               | 634.3297++ (heavy)                                                                  |  | 481.7497++ (heavy)               |  | 887.9405++ (heavy)               |
|               | Q [y8] - 1067.5360+ (rank 3)                                                        |  | T [y6] - 704.4069+ (rank 4)      |  | H [y10] - 1110.6033+ (rank 1)    |
|               | Y [y7] - 939.4774+ (rank 1)                                                         |  | F [y5] - 603.3592+ (rank 3)      |  | A [y9] - 973.5444+ (rank 2)      |
|               | N [y5] - 648.3555+ (rank 4)                                                         |  | S [y4] - 456.2908+ (rank 1)      |  | F [y7] - 789.4232+ (rank 3)      |
|               | R.IPSTDANLPSSGGK.G [165, 177]                                                       |  |                                  |  |                                  |
|               | 628.8277++                                                                          |  |                                  |  |                                  |
|               | S [y11] - 1046.5113+ (rank 2)                                                       |  |                                  |  |                                  |
|               | A [y8] - 743.4046+ (rank 3)                                                         |  |                                  |  |                                  |
|               | P [y5] - 445.2405+ (rank 1)                                                         |  |                                  |  |                                  |
|               | 632.8348++ (heavy)                                                                  |  |                                  |  |                                  |
|               | S [y11] - 1054.5255+ (rank 2)                                                       |  |                                  |  |                                  |
|               | A [y8] - 751.4188+ (rank 3)                                                         |  |                                  |  |                                  |
|               | P [y5] - 453.2547+ (rank 1)                                                         |  |                                  |  |                                  |
| <b>RAB17</b>  | <b>IPI: IPI00007866.1   SWISS-PROT: Q9H0T7   RAB17 Ras-related protein Rab-17</b>   |  |                                  |  |                                  |
|               | K.SILPTVGCFFTK.V [45, 57]                                                           |  | K.LEIWDTAGQEK.Y [68, 78]         |  | K.YHSVCHLYFR.G [79, 88]          |
|               | 720.8814++                                                                          |  | 645.3222++                       |  | 461.2205+++                      |
|               | P [y10] - 1127.5554+ (rank 1)                                                       |  | W [y8] - 934.4265+ (rank 1)      |  | C [y6] - 895.4243+ (rank 4)      |
|               | G [y7] - 830.3865+ (rank 2)                                                         |  | D [y7] - 748.3472+ (rank 2)      |  | L [y4] - 598.3348+ (rank 2)      |
|               | F [y3] - 395.2289+ (rank 3)                                                         |  | T [y6] - 633.3202+ (rank 4)      |  | Y [y3] - 485.2507+ (rank 1)      |
|               | 724.8885++ (heavy)                                                                  |  | 649.3293++ (heavy)               |  | 463.2272+++ (heavy)              |
|               | P [y10] - 1135.5696+ (rank 1)                                                       |  | W [y8] - 942.4407+ (rank 1)      |  | C [y6] - 901.4444+ (rank 4)      |
|               | G [y7] - 838.4007+ (rank 2)                                                         |  | D [y7] - 756.3614+ (rank 2)      |  | L [y4] - 604.3549+ (rank 2)      |
|               | F [y3] - 403.2431+ (rank 3)                                                         |  | T [y6] - 641.3344+ (rank 4)      |  | Y [y3] - 491.2708+ (rank 1)      |
|               | R.SDEEGQALR.G [183, 191]                                                            |  |                                  |  |                                  |
|               | 502.7358++                                                                          |  |                                  |  |                                  |
|               | E [y7] - 802.4054+ (rank 3)                                                         |  |                                  |  |                                  |
|               | E [y6] - 673.3628+ (rank 2)                                                         |  |                                  |  |                                  |
|               | G [y5] - 544.3202+ (rank 1)                                                         |  |                                  |  |                                  |
|               | 505.7459++ (heavy)                                                                  |  |                                  |  |                                  |
|               | E [y7] - 808.4255+ (rank 3)                                                         |  |                                  |  |                                  |
|               | E [y6] - 679.3829+ (rank 2)                                                         |  |                                  |  |                                  |
|               | G [y5] - 550.3403+ (rank 1)                                                         |  |                                  |  |                                  |
| <b>RAB23</b>  | <b>IPI: IPI00008034.1   SWISS-PROT: Q9ULC3   RAB23 Ras-related protein Rab-23</b>   |  |                                  |  |                                  |
|               | K.TIGVDFLER.Q [40, 48]                                                              |  | R.QIQVNDEDVRL.L [49, 58]         |  | K.EDLNVNEVFK.Y [153, 162]        |
|               | 525.2849++                                                                          |  | 608.3018++                       |  | 603.8037++                       |
|               | G [y7] - 835.4308+ (rank 1)                                                         |  | Q [y8] - 974.4538+ (rank 3)      |  | N [y7] - 849.4465+ (rank 3)      |
|               | D [y5] - 679.3410+ (rank 2)                                                         |  | V [y7] - 846.3952+ (rank 2)      |  | V [y6] - 735.4036+ (rank 2)      |
|               | F [y4] - 564.3140+ (rank 3)                                                         |  | N [y6] - 747.3268+ (rank 1)      |  | N [y5] - 636.3352+ (rank 1)      |
|               | 528.2950++ (heavy)                                                                  |  | 611.3119++ (heavy)               |  | 607.8108++ (heavy)               |
|               | G [y7] - 841.4510+ (rank 1)                                                         |  | Q [y8] - 980.4739+ (rank 3)      |  | N [y7] - 857.4607+ (rank 3)      |
|               | D [y5] - 685.3611+ (rank 2)                                                         |  | V [y7] - 852.4153+ (rank 2)      |  | V [y6] - 743.4178+ (rank 2)      |
|               | F [y4] - 570.3342+ (rank 3)                                                         |  | N [y6] - 753.3469+ (rank 1)      |  | N [y5] - 644.3494+ (rank 1)      |
| <b>RAB1B</b>  | <b>IPI: IPI00008964.3   SWISS-PROT: Q9H0U4   RAB1B Ras-related protein Rab-1B</b>   |  |                                  |  |                                  |
|               | -.MNPEYDYLFK.L [0, 9]                                                               |  | K.NATNVEQAFMTMAAEIK.K [153, 169] |  | R.MGPGAASGGERPNIK.I [172, 186]   |
|               | 660.3025++                                                                          |  | 934.9477++                       |  | 721.3644++                       |
|               | P [y8] - 1074.5142+ (rank 1)                                                        |  | A [y10] - 1112.5479+ (rank 3)    |  | A [y10] - 1028.5483+ (rank 3)    |
|               | E [y7] - 977.4615+ (rank 5)                                                         |  | F [y9] - 1041.5108+ (rank 1)     |  | S [y9] - 957.5112+ (rank 2)      |
|               | Y [y6] - 848.4189+ (rank 2)                                                         |  | M [y8] - 894.4423+ (rank 4)      |  | 728.3816++ (heavy)               |
|               | 664.3096++ (heavy)                                                                  |  | 938.9548++ (heavy)               |  | A [y10] - 1042.5827+ (rank 3)    |
|               | P [y8] - 1082.5284+ (rank 1)                                                        |  | A [y10] - 1120.5621+ (rank 3)    |  | S [y9] - 971.5455+ (rank 2)      |
|               | E [y7] - 985.4757+ (rank 5)                                                         |  | F [y9] - 1049.5249+ (rank 1)     |  | K.IDSTPVKPAAGGGCC.- [187, 200]   |
|               | Y [y6] - 856.4331+ (rank 2)                                                         |  | M [y8] - 902.4565+ (rank 4)      |  | 709.8238++                       |
|               |                                                                                     |  | 623.6342+++                      |  | P [y10] - 1002.4495+ (rank 1)    |
|               |                                                                                     |  | M [y8] - 894.4423+ (rank 3)      |  | K [y8] - 806.3284+ (rank 3)      |
|               |                                                                                     |  | A [y5] - 531.3137+ (rank 2)      |  | P [y7] - 678.2334+ (rank 2)      |

|               |                                                                                                          |  |                              |  |                               |
|---------------|----------------------------------------------------------------------------------------------------------|--|------------------------------|--|-------------------------------|
|               |                                                                                                          |  | A [y4] - 460.2766+ (rank 1)  |  | 713.8309++ (heavy)            |
|               |                                                                                                          |  | 626.3056+++ (heavy)          |  | P [y10] - 1010.4637+ (rank 1) |
|               |                                                                                                          |  | M [y8] - 902.4565+ (rank 3)  |  | K [y8] - 814.3426+ (rank 3)   |
|               |                                                                                                          |  | A [y5] - 539.3279+ (rank 2)  |  | P [y7] - 678.2334+ (rank 2)   |
|               |                                                                                                          |  | A [y4] - 468.2908+ (rank 1)  |  |                               |
| <b>RABL2B</b> | <b>IPI: IPI00009415.1   SWISS-PROT: Q9UNT1-1   RABL2B Isoform 1 of Rab-like protein 2B</b>               |  |                              |  |                               |
|               | K.AHACIMVFDVQR.K [93, 104]                                                                               |  |                              |  |                               |
|               | 723.8527++                                                                                               |  |                              |  |                               |
|               | A [y10] - 1238.6020+ (rank 1)                                                                            |  |                              |  |                               |
|               | C [y9] - 1167.5649+ (rank 2)                                                                             |  |                              |  |                               |
|               | M [y7] - 894.4502+ (rank 3)                                                                              |  |                              |  |                               |
|               | 726.8627++ (heavy)                                                                                       |  |                              |  |                               |
|               | A [y10] - 1244.6222+ (rank 1)                                                                            |  |                              |  |                               |
|               | C [y9] - 1173.5850+ (rank 2)                                                                             |  |                              |  |                               |
|               | M [y7] - 900.4703+ (rank 3)                                                                              |  |                              |  |                               |
|               | 482.9042+++                                                                                              |  |                              |  |                               |
|               | F [y5] - 664.3413+ (rank 1)                                                                              |  |                              |  |                               |
|               | D [y4] - 517.2729+ (rank 3)                                                                              |  |                              |  |                               |
|               | V [y3] - 402.2459+ (rank 2)                                                                              |  |                              |  |                               |
|               | 484.9109+++ (heavy)                                                                                      |  |                              |  |                               |
|               | F [y5] - 670.3614+ (rank 1)                                                                              |  |                              |  |                               |
|               | D [y4] - 523.2930+ (rank 3)                                                                              |  |                              |  |                               |
|               | V [y3] - 408.2661+ (rank 2)                                                                              |  |                              |  |                               |
| <b>RAP2C</b>  | <b>IPI: IPI00009607.1   RAP2C Ras-related protein Rap-2c</b>                                             |  |                              |  |                               |
|               | K.VPLILVGNK.V [108, 116]                                                                                 |  | K.VDLEPER.E [117, 123]       |  | R.EVMSSEGR.A [124, 131]       |
|               | 476.8131++                                                                                               |  | 429.2218++                   |  | 447.7029++                    |
|               | L [y7] - 756.4978+ (rank 1)                                                                              |  | D [y6] - 758.3679+ (rank 3)  |  | M [y6] - 666.2876+ (rank 2)   |
|               | I [y6] - 643.4137+ (rank 3)                                                                              |  | L [y5] - 643.3410+ (rank 2)  |  | S [y5] - 535.2471+ (rank 1)   |
|               | L [y5] - 530.3297+ (rank 2)                                                                              |  | P [y3] - 401.2143+ (rank 1)  |  | S [y4] - 448.2150+ (rank 3)   |
|               | 480.8202++ (heavy)                                                                                       |  | 432.2319++ (heavy)           |  | 450.7130++ (heavy)            |
|               | L [y7] - 764.5120+ (rank 1)                                                                              |  | D [y6] - 764.3880+ (rank 3)  |  | M [y6] - 672.3077+ (rank 2)   |
|               | I [y6] - 651.4279+ (rank 3)                                                                              |  | L [y5] - 649.3611+ (rank 2)  |  | S [y5] - 541.2672+ (rank 1)   |
|               | L [y5] - 538.3439+ (rank 2)                                                                              |  | P [y3] - 407.2344+ (rank 1)  |  | S [y4] - 454.2352+ (rank 3)   |
|               | R.ALAQEWGCPFMETSAK.S [132, 147]                                                                          |  | R.QMNYSSLPEK.Q [162, 171]    |  |                               |
|               | 913.4160++                                                                                               |  | 598.7844++                   |  |                               |
|               | G [y10] - 1127.4860+ (rank 1)                                                                            |  | S [y6] - 660.3563+ (rank 2)  |  |                               |
|               | C [y9] - 1070.4645+ (rank 3)                                                                             |  | S [y5] - 573.3243+ (rank 3)  |  |                               |
|               | E [y5] - 535.2722+ (rank 5)                                                                              |  | P [y3] - 373.2082+ (rank 1)  |  |                               |
|               | 917.4231++ (heavy)                                                                                       |  | 602.7915++ (heavy)           |  |                               |
|               | G [y10] - 1135.5002+ (rank 1)                                                                            |  | S [y6] - 668.3705+ (rank 2)  |  |                               |
|               | C [y9] - 1078.4787+ (rank 3)                                                                             |  | S [y5] - 581.3385+ (rank 3)  |  |                               |
|               | E [y5] - 543.2864+ (rank 5)                                                                              |  | P [y3] - 381.2224+ (rank 1)  |  |                               |
| <b>RHO</b>    | <b>IPI: IPI00009644.1   SWISS-PROT: Q7L0Q8-1   RHO Isoform 1 of Rho-related GTP-binding protein RhoU</b> |  |                              |  |                               |
|               | K.CVLVGDGAVGK.T [51, 61]                                                                                 |  |                              |  |                               |
|               | 537.7842++                                                                                               |  |                              |  |                               |
|               | V [y8] - 702.3781+ (rank 1)                                                                              |  |                              |  |                               |
|               | G [y7] - 603.3097+ (rank 2)                                                                              |  |                              |  |                               |
|               | A [y4] - 374.2398+ (rank 3)                                                                              |  |                              |  |                               |
|               | 541.7913++ (heavy)                                                                                       |  |                              |  |                               |
|               | V [y8] - 710.3923+ (rank 1)                                                                              |  |                              |  |                               |
|               | G [y7] - 611.3239+ (rank 2)                                                                              |  |                              |  |                               |
|               | A [y4] - 382.2540+ (rank 3)                                                                              |  |                              |  |                               |
| <b>RABL5</b>  | <b>IPI: IPI00009700.4   SWISS-PROT: Q9H7X7-1   RABL5 Isoform 1 of Rab-like protein 5</b>                 |  |                              |  |                               |
|               | K.ILFVGPCESGK.T [5, 15]                                                                                  |  | R.ILEFENPHVTSNNK.G [39, 52]  |  | K.FESCWPALMK.D [69, 78]       |
|               | 603.8130++                                                                                               |  | 821.4152++                   |  | 634.7938++                    |
|               | F [y9] - 980.4506+ (rank 2)                                                                              |  | N [y9] - 1010.5014+ (rank 3) |  | S [y8] - 992.4692+ (rank 1)   |
|               | G [y7] - 734.3138+ (rank 1)                                                                              |  | P [y8] - 896.4585+ (rank 1)  |  | W [y6] - 745.4065+ (rank 3)   |
|               | P [y6] - 677.2923+ (rank 3)                                                                              |  | T [y5] - 563.2784+ (rank 2)  |  | P [y5] - 559.3272+ (rank 2)   |
|               | 607.8201++ (heavy)                                                                                       |  | 825.4223++ (heavy)           |  | 638.8009++ (heavy)            |
|               | F [y9] - 988.4648+ (rank 2)                                                                              |  | N [y9] - 1018.5156+ (rank 3) |  | S [y8] - 1000.4834+ (rank 1)  |
|               | G [y7] - 742.3280+ (rank 1)                                                                              |  | P [y8] - 904.4727+ (rank 1)  |  | W [y6] - 753.4207+ (rank 3)   |
|               | P [y6] - 685.3065+ (rank 3)                                                                              |  | T [y5] - 571.2926+ (rank 2)  |  | P [y5] - 567.3414+ (rank 2)   |
|               | K.SIINSMSER.D [166, 175]                                                                                 |  |                              |  |                               |
|               | 562.2742++                                                                                               |  |                              |  |                               |
|               | I [y8] - 923.4251+ (rank 2)                                                                              |  |                              |  |                               |
|               | N [y7] - 810.3410+ (rank 1)                                                                              |  |                              |  |                               |
|               | S [y6] - 696.2981+ (rank 3)                                                                              |  |                              |  |                               |
|               | 565.2843++ (heavy)                                                                                       |  |                              |  |                               |
|               | I [y8] - 929.4452+ (rank 2)                                                                              |  |                              |  |                               |
|               | N [y7] - 816.3612+ (rank 1)                                                                              |  |                              |  |                               |
|               | S [y6] - 702.3182+ (rank 3)                                                                              |  |                              |  |                               |
| <b>RRAGD</b>  | <b>IPI: IPI00009737.1   SWISS-PROT: Q9NQL2-1   RRAGD Isoform 1 of Ras-related GTP-binding protein D</b>  |  |                              |  |                               |
|               | K.MSPNETLFLESTNK.I [85, 98]                                                                              |  | K.LNNTTVLYLK.E [320, 329]    |  |                               |
|               | 805.8902++                                                                                               |  | 589.8426++                   |  |                               |
|               | F [y7] - 838.4305+ (rank 1)                                                                              |  | N [y8] - 951.5510+ (rank 1)  |  |                               |
|               | L [y6] - 691.3621+ (rank 2)                                                                              |  | T [y7] - 837.5080+ (rank 3)  |  |                               |
|               | S [y4] - 449.2354+ (rank 3)                                                                              |  | T [y6] - 736.4604+ (rank 2)  |  |                               |

|               |                                                                                                           |  |                                  |  |  |                               |  |
|---------------|-----------------------------------------------------------------------------------------------------------|--|----------------------------------|--|--|-------------------------------|--|
|               | 809.8973++ (heavy)                                                                                        |  | 593.8497++ (heavy)               |  |  |                               |  |
|               | F [y7] - 846.4447+ (rank 1)                                                                               |  | N [y8] - 959.5652+ (rank 1)      |  |  |                               |  |
|               | L [y6] - 699.3763+ (rank 2)                                                                               |  | T [y7] - 845.5222+ (rank 3)      |  |  |                               |  |
|               | S [y4] - 457.2496+ (rank 3)                                                                               |  | T [y6] - 744.4746+ (rank 2)      |  |  |                               |  |
| <b>ARL4C</b>  | <b>IPI:IP100010149.2 TREMBL:Q4A519 ARL4C ADP ribosylation factor-like protein 7</b>                       |  |                                  |  |  |                               |  |
|               | K.GISCHFWDVGGQEK.L [60, 73]                                                                               |  | K.FAENQGTPLLVIANK.Q [113, 127]   |  |  | K.LYEMILK.R [174, 180]        |  |
|               | 540.5806+++                                                                                               |  | 807.9461++                       |  |  | 455.2593++                    |  |
|               | W [y8] - 918.4316+ (rank 3)                                                                               |  | G [y10] - 1025.6354+ (rank 2)    |  |  | Y [y6] - 796.4273+ (rank 2)   |  |
|               | V [y6] - 617.3253+ (rank 2)                                                                               |  | P [y8] - 867.5662+ (rank 1)      |  |  | E [y5] - 633.3640+ (rank 3)   |  |
|               | G [y5] - 518.2569+ (rank 1)                                                                               |  | I [y4] - 445.2769+ (rank 3)      |  |  | M [y4] - 504.3214+ (rank 5)   |  |
|               | 543.2520+++ (heavy)                                                                                       |  | 811.9532++ (heavy)               |  |  | 459.2664++ (heavy)            |  |
|               | W [y8] - 926.4458+ (rank 3)                                                                               |  | G [y10] - 1033.6496+ (rank 2)    |  |  | Y [y6] - 804.4415+ (rank 2)   |  |
|               | V [y6] - 625.3395+ (rank 2)                                                                               |  | P [y8] - 875.5804+ (rank 1)      |  |  | E [y5] - 641.3782+ (rank 3)   |  |
|               | G [y5] - 526.2711+ (rank 1)                                                                               |  | I [y4] - 453.2911+ (rank 3)      |  |  | M [y4] - 512.3356+ (rank 5)   |  |
| <b>RAC2</b>   | <b>IPI:IP100010270.1 SWISS-PROT:P15153 RAC2 Ras-related C3 botulinum toxin substrate 2</b>                |  |                                  |  |  |                               |  |
|               | R.HHCPTPIILVGTK.L [102, 115]                                                                              |  | K.LAPITYPQGLALAK.E [133, 146]    |  |  | R.AVLCPQPTR.Q [174, 182]      |  |
|               | 780.4218++                                                                                                |  | 728.4321++                       |  |  | 1041.5510+                    |  |
|               | P [y11] - 1125.6878+ (rank 1)                                                                             |  | T [y10] - 1061.5990+ (rank 2)    |  |  | P [y5] - 598.3307+ (rank 1)   |  |
|               | P [y8] - 840.5553+ (rank 3)                                                                               |  | Y [y9] - 960.5513+ (rank 3)      |  |  | P [y3] - 373.2194+ (rank 2)   |  |
|               | L [y5] - 517.3344+ (rank 4)                                                                               |  | P [y8] - 797.4880+ (rank 1)      |  |  | 1047.5711+ (heavy)            |  |
|               | 784.4289++ (heavy)                                                                                        |  | 732.4392++ (heavy)               |  |  | P [y5] - 604.3509+ (rank 1)   |  |
|               | P [y11] - 1133.7020+ (rank 1)                                                                             |  | T [y10] - 1069.6132+ (rank 2)    |  |  | P [y3] - 379.2395+ (rank 2)   |  |
|               | P [y8] - 848.5695+ (rank 3)                                                                               |  | Y [y9] - 968.5655+ (rank 3)      |  |  | 521.2791++                    |  |
|               | L [y5] - 525.3486+ (rank 4)                                                                               |  | P [y8] - 805.5022+ (rank 1)      |  |  | L [y7] - 871.4454+ (rank 3)   |  |
|               |                                                                                                           |  | 485.9572+++                      |  |  | C [y6] - 758.3614+ (rank 2)   |  |
|               |                                                                                                           |  | P [y8] - 797.4880+ (rank 3)      |  |  | P [y5] - 598.3307+ (rank 1)   |  |
|               |                                                                                                           |  | Q [y7] - 700.4352+ (rank 2)      |  |  | 524.2892++ (heavy)            |  |
|               |                                                                                                           |  | G [y6] - 572.3766+ (rank 1)      |  |  | L [y7] - 877.4656+ (rank 3)   |  |
|               |                                                                                                           |  | 488.6286+++ (heavy)              |  |  | C [y6] - 764.3815+ (rank 2)   |  |
|               |                                                                                                           |  | P [y8] - 805.5022+ (rank 3)      |  |  | P [y5] - 604.3509+ (rank 1)   |  |
|               |                                                                                                           |  | Q [y7] - 708.4494+ (rank 2)      |  |  |                               |  |
|               |                                                                                                           |  | G [y6] - 580.3908+ (rank 1)      |  |  |                               |  |
| <b>RAC1</b>   | <b>IPI:IP100010271.3 SWISS-PROT:P63000-1 RAC1 Isoform A of Ras-related C3 botulinum toxin substrate 1</b> |  |                                  |  |  |                               |  |
|               | R.HHCPTPIILVGTK.L [102, 115]                                                                              |  | K.LTPITYPQGLAMAK.E [133, 146]    |  |  | K.LTPITYPQGLAMAK.E [133, 146] |  |
|               | 793.9272++                                                                                                |  | 752.4156++                       |  |  | 760.4131++                    |  |
|               | P [y11] - 1152.6987+ (rank 1)                                                                             |  | T [y10] - 1079.5554+ (rank 3)    |  |  | T [y10] - 1095.5503+ (rank 2) |  |
|               | L [y5] - 517.3344+ (rank 3)                                                                               |  | Y [y9] - 978.5077+ (rank 2)      |  |  | Y [y9] - 994.5026+ (rank 3)   |  |
|               | V [y4] - 404.2504+ (rank 5)                                                                               |  | P [y8] - 815.4444+ (rank 1)      |  |  | P [y8] - 831.4393+ (rank 1)   |  |
|               | 797.9343++ (heavy)                                                                                        |  | 756.4227++ (heavy)               |  |  | 764.4202++ (heavy)            |  |
|               | P [y11] - 1160.7129+ (rank 1)                                                                             |  | T [y10] - 1087.5696+ (rank 3)    |  |  | T [y10] - 1103.5645+ (rank 2) |  |
|               | L [y5] - 525.3486+ (rank 3)                                                                               |  | Y [y9] - 986.5219+ (rank 2)      |  |  | Y [y9] - 1002.5168+ (rank 3)  |  |
|               | V [y4] - 412.2646+ (rank 5)                                                                               |  | P [y8] - 823.4586+ (rank 1)      |  |  | P [y8] - 839.4535+ (rank 1)   |  |
| <b>RRAGB</b>  | <b>IPI:IP100010317.4 SWISS-PROT:Q5VZM2-1 RRAGB Isoform 1 of Ras-related GTP-binding protein B</b>         |  |                                  |  |  |                               |  |
|               | R.SIIFANYIAR.D [57, 66]                                                                                   |  | R.NFAEIIIEADEVLLFER.A [253, 268] |  |  | K.LAASFQSMEVR.N [305, 315]    |  |
|               | 584.3297++                                                                                                |  | 954.4911++                       |  |  | 619.8135++                    |  |
|               | I [y8] - 967.5360+ (rank 2)                                                                               |  | E [y10] - 1220.6157+ (rank 2)    |  |  | A [y9] - 1054.4986+ (rank 3)  |  |
|               | F [y7] - 854.4519+ (rank 1)                                                                               |  | A [y9] - 1091.5732+ (rank 4)     |  |  | S [y8] - 983.4615+ (rank 2)   |  |
|               | A [y6] - 707.3835+ (rank 3)                                                                               |  | D [y8] - 1020.5360+ (rank 5)     |  |  | Q [y6] - 749.3610+ (rank 1)   |  |
|               | 587.3397++ (heavy)                                                                                        |  | 957.5012++ (heavy)               |  |  | 622.8236++ (heavy)            |  |
|               | I [y8] - 973.5561+ (rank 2)                                                                               |  | E [y10] - 1226.6359+ (rank 2)    |  |  | A [y9] - 1060.5187+ (rank 3)  |  |
|               | F [y7] - 860.4720+ (rank 1)                                                                               |  | A [y9] - 1097.5933+ (rank 4)     |  |  | S [y8] - 989.4816+ (rank 2)   |  |
|               | A [y6] - 713.4036+ (rank 3)                                                                               |  | D [y8] - 1026.5562+ (rank 5)     |  |  | Q [y6] - 755.3812+ (rank 1)   |  |
| <b>RAB27B</b> | <b>IPI:IP100010491.3 SWISS-PROT:O00194 RAB27B Ras-related protein Rab-27B</b>                             |  |                                  |  |  |                               |  |
|               | K.LLALGDSGVGK.T [11, 21]                                                                                  |  | R.VVYNAQGPNGSSGK.A [50, 63]      |  |  | K.VHLQLWDTAGQER.F [67, 79]    |  |
|               | 515.3006++                                                                                                |  | 689.3415++                       |  |  | 776.8970++                    |  |
|               | A [y9] - 803.4258+ (rank 1)                                                                               |  | Y [y12] - 1179.5389+ (rank 3)    |  |  | W [y8] - 962.4326+ (rank 4)   |  |
|               | L [y8] - 732.3886+ (rank 3)                                                                               |  | A [y10] - 902.4326+ (rank 2)     |  |  | D [y7] - 776.3533+ (rank 1)   |  |
|               | G [y7] - 619.3046+ (rank 2)                                                                               |  | G [y8] - 703.3369+ (rank 1)      |  |  | T [y6] - 661.3264+ (rank 2)   |  |
|               | 519.3077++ (heavy)                                                                                        |  | 693.3486++ (heavy)               |  |  | 779.9070++ (heavy)            |  |
|               | A [y9] - 811.4400+ (rank 1)                                                                               |  | Y [y12] - 1187.5531+ (rank 3)    |  |  | W [y8] - 968.4528+ (rank 4)   |  |
|               | L [y8] - 740.4028+ (rank 3)                                                                               |  | A [y10] - 910.4468+ (rank 2)     |  |  | D [y7] - 782.3735+ (rank 1)   |  |
|               | G [y7] - 627.3188+ (rank 2)                                                                               |  | G [y8] - 711.3511+ (rank 1)      |  |  | T [y6] - 667.3465+ (rank 2)   |  |
|               | K.YGIPYFETSAATGQNVEK.A [154, 171]                                                                         |  | K.AVETLLDLIMK.R [172, 182]       |  |  | 518.2671+++                   |  |
|               | 987.9758++                                                                                                |  | 623.3598++                       |  |  | T [y6] - 661.3264+ (rank 2)   |  |
|               | T [y11] - 1105.5484+ (rank 2)                                                                             |  | E [y9] - 1075.6068+ (rank 4)     |  |  | A [y5] - 560.2787+ (rank 3)   |  |
|               | S [y10] - 1004.5007+ (rank 1)                                                                             |  | L [y6] - 732.4324+ (rank 1)      |  |  | G [y4] - 489.2416+ (rank 1)   |  |
|               | A [y8] - 846.4316+ (rank 3)                                                                               |  | D [y5] - 619.3484+ (rank 2)      |  |  | 520.2738+++ (heavy)           |  |
|               | 991.9829++ (heavy)                                                                                        |  | 627.3669++ (heavy)               |  |  | T [y6] - 667.3465+ (rank 2)   |  |
|               | T [y11] - 1113.5626+ (rank 2)                                                                             |  | E [y9] - 1083.6210+ (rank 4)     |  |  | A [y5] - 566.2988+ (rank 3)   |  |
|               | S [y10] - 1012.5149+ (rank 1)                                                                             |  | L [y6] - 740.4466+ (rank 1)      |  |  | G [y4] - 495.2617+ (rank 1)   |  |
|               | A [y8] - 854.4458+ (rank 3)                                                                               |  | D [y5] - 627.3626+ (rank 2)      |  |  |                               |  |
| <b>RHOD</b>   | <b>IPI:IP100010841.2 SWISS-PROT:O00212 RHOD Rho-related GTP-binding protein RhoD</b>                      |  |                                  |  |  |                               |  |
|               | K.GKPVHLHIWDTAGQDDYDR.L [61, 79]                                                                          |  | R.WYPEVNHFK.K [110, 119]         |  |  | R.SVGAVAYLECSAR.L [161, 173]  |  |
|               | 741.6908+++                                                                                               |  | 460.5449+++                      |  |  | 691.8403++                    |  |
|               | A [y8] - 939.3803+ (rank 2)                                                                               |  | P [y8] - 1030.4775+ (rank 1)     |  |  | V [y9] - 1068.5143+ (rank 3)  |  |
|               | G [y7] - 868.3432+ (rank 1)                                                                               |  | E [y7] - 933.4247+ (rank 3)      |  |  | A [y8] - 969.4458+ (rank 1)   |  |
|               | D [y4] - 568.2362+ (rank 3)                                                                               |  | V [y6] - 804.3821+ (rank 4)      |  |  | Y [y7] - 898.4087+ (rank 2)   |  |

|              |                                                                                                              |  |                                 |  |                               |
|--------------|--------------------------------------------------------------------------------------------------------------|--|---------------------------------|--|-------------------------------|
|              | 746.3689+++ (heavy)                                                                                          |  | 463.2163+++ (heavy)             |  | 694.8503++ (heavy)            |
|              | A [y8] - 945.4004+ (rank 2)                                                                                  |  | P [y8] - 1038.4917+ (rank 1)    |  | V [y9] - 1074.5344+ (rank 3)  |
|              | G [y7] - 874.3633+ (rank 1)                                                                                  |  | E [y7] - 941.4389+ (rank 3)     |  | A [y8] - 975.4660+ (rank 1)   |
|              | D [y4] - 574.2563+ (rank 3)                                                                                  |  | V [y6] - 812.3963+ (rank 4)     |  | Y [y7] - 904.4289+ (rank 2)   |
| <b>RHOQ</b>  | <b>IPI:IP100012511.6 SWISS-PROT:P17081 RHOQ Rho-related GTP-binding protein RhoQ</b>                         |  |                                 |  |                               |
|              | K.EEWVPELK.E [100, 107]                                                                                      |  | K.EIGACCYVECSALTQK.G [153, 168] |  | K.TVFDEAIIAILTPK.K [172, 185] |
|              | 515.2662++                                                                                                   |  | 944.9155++                      |  | 765.9425++                    |
|              | W [y6] - 771.4400+ (rank 5)                                                                                  |  | V [y9] - 1035.5139+ (rank 3)    |  | I [y7] - 755.5026+ (rank 3)   |
|              | V [y5] - 585.3606+ (rank 3)                                                                                  |  | E [y8] - 936.4455+ (rank 1)     |  | A [y6] - 642.4185+ (rank 4)   |
|              | P [y4] - 486.2922+ (rank 1)                                                                                  |  | C [y7] - 807.4029+ (rank 2)     |  | T [y3] - 345.2132+ (rank 2)   |
|              | 519.2733++ (heavy)                                                                                           |  | 948.9226++ (heavy)              |  | 769.9496++ (heavy)            |
|              | W [y6] - 779.4542+ (rank 5)                                                                                  |  | V [y9] - 1043.5281+ (rank 3)    |  | I [y7] - 763.5168+ (rank 3)   |
|              | V [y5] - 593.3748+ (rank 3)                                                                                  |  | E [y8] - 944.4597+ (rank 1)     |  | A [y6] - 650.4327+ (rank 4)   |
|              | P [y4] - 494.3064+ (rank 1)                                                                                  |  | C [y7] - 815.4171+ (rank 2)     |  | T [y3] - 353.2274+ (rank 2)   |
| <b>RRAS2</b> | <b>IPI:IP100012512.2 SWISS-PROT:P62070 RRAS2 cDNA FLJ61162, highly similar to Ras-related protein R-Ras2</b> |  |                                 |  |                               |
|              | R.LVVVGGGGVVGK.S [16, 26]                                                                                    |  | R.LDILDTAGQEEFGAMR.E [69, 84]   |  | R.TGEGFLLVFSVTD.R.G [90, 103] |
|              | 471.2926++                                                                                                   |  | 883.4249++                      |  | 770.9039++                    |
|              | V [y9] - 729.4254+ (rank 1)                                                                                  |  | A [y10] - 1095.4888+ (rank 2)   |  | L [y8] - 936.5149+ (rank 1)   |
|              | V [y8] - 630.3570+ (rank 3)                                                                                  |  | G [y9] - 1024.4517+ (rank 1)    |  | V [y7] - 823.4308+ (rank 2)   |
|              | G [y7] - 531.2885+ (rank 2)                                                                                  |  | E [y7] - 839.3716+ (rank 3)     |  | F [y6] - 724.3624+ (rank 3)   |
|              | 475.2997++ (heavy)                                                                                           |  | 886.4350++ (heavy)              |  | 773.9140++ (heavy)            |
|              | V [y9] - 737.4396+ (rank 1)                                                                                  |  | A [y10] - 1101.5089+ (rank 2)   |  | L [y8] - 942.5350+ (rank 1)   |
|              | V [y8] - 638.3711+ (rank 3)                                                                                  |  | G [y9] - 1030.4718+ (rank 1)    |  | V [y7] - 829.4510+ (rank 2)   |
|              | G [y7] - 539.3027+ (rank 2)                                                                                  |  | E [y7] - 845.3917+ (rank 3)     |  | F [y6] - 730.3826+ (rank 3)   |
|              | R.QVTQEEGQQLAR.Q [141, 152]                                                                                  |  |                                 |  |                               |
|              | 693.8522++                                                                                                   |  |                                 |  |                               |
|              | T [y10] - 1159.5702+ (rank 2)                                                                                |  |                                 |  |                               |
|              | E [y7] - 801.4213+ (rank 3)                                                                                  |  |                                 |  |                               |
|              | G [y6] - 672.3787+ (rank 1)                                                                                  |  |                                 |  |                               |
|              | 696.8623++ (heavy)                                                                                           |  |                                 |  |                               |
|              | T [y10] - 1165.5903+ (rank 2)                                                                                |  |                                 |  |                               |
|              | E [y7] - 807.4415+ (rank 3)                                                                                  |  |                                 |  |                               |
|              | G [y6] - 678.3989+ (rank 1)                                                                                  |  |                                 |  |                               |
| <b>RAB31</b> | <b>IPI:IP100014376.5 SWISS-PROT:Q13636 RAB31 ras-related protein Rab-31</b>                                  |  |                                 |  |                               |
|              | R.FHSLAPMYR.G [67, 76]                                                                                       |  | R.GSAAVIVYDITK.Q [77, 89]       |  | K.QDSFYTLK.K [90, 97]         |
|              | 642.8133++                                                                                                   |  | 654.3639++                      |  | 501.2506++                    |
|              | S [y8] - 1000.4921+ (rank 1)                                                                                 |  | I [y7] - 851.4873+ (rank 1)     |  | S [y6] - 758.4083+ (rank 3)   |
|              | A [y6] - 800.3760+ (rank 3)                                                                                  |  | V [y6] - 738.4032+ (rank 2)     |  | Y [y4] - 524.3079+ (rank 1)   |
|              | P [y5] - 729.3389+ (rank 2)                                                                                  |  | Y [y5] - 639.3348+ (rank 3)     |  | T [y3] - 361.2445+ (rank 2)   |
|              | 645.8234++ (heavy)                                                                                           |  | 658.3710++ (heavy)              |  | 505.2577++ (heavy)            |
|              | S [y8] - 1006.5122+ (rank 1)                                                                                 |  | I [y7] - 859.5015+ (rank 1)     |  | S [y6] - 766.4225+ (rank 3)   |
|              | A [y6] - 806.3961+ (rank 3)                                                                                  |  | V [y6] - 746.4174+ (rank 2)     |  | Y [y4] - 532.3221+ (rank 1)   |
|              | P [y5] - 735.3590+ (rank 2)                                                                                  |  | Y [y5] - 647.3490+ (rank 3)     |  | T [y3] - 369.2587+ (rank 2)   |
| <b>RAB32</b> | <b>IPI:IP100014377.3 SWISS-PROT:Q13637 RAB32 Ras-related protein Rab-32</b>                                  |  |                                 |  |                               |
|              | K.VLVIGELGVGK.T [27, 37]                                                                                     |  | R.SSTFEAVLK.W [110, 118]        |  | K.DNINIEEAAR.F [176, 185]     |
|              | 542.3422++                                                                                                   |  | 491.2662++                      |  | 572.7833++                    |
|              | V [y9] - 871.5247+ (rank 1)                                                                                  |  | T [y7] - 807.4611+ (rank 2)     |  | N [y7] - 802.4054+ (rank 1)   |
|              | I [y8] - 772.4563+ (rank 3)                                                                                  |  | F [y6] - 706.4134+ (rank 1)     |  | I [y6] - 688.3624+ (rank 2)   |
|              | G [y7] - 659.3723+ (rank 2)                                                                                  |  | E [y5] - 559.3450+ (rank 3)     |  | E [y4] - 446.2358+ (rank 3)   |
|              | 546.3493++ (heavy)                                                                                           |  | 495.2733++ (heavy)              |  | 575.7933++ (heavy)            |
|              | V [y9] - 879.5389+ (rank 1)                                                                                  |  | T [y7] - 815.4753+ (rank 2)     |  | N [y7] - 808.4255+ (rank 1)   |
|              | I [y8] - 780.4705+ (rank 3)                                                                                  |  | F [y6] - 714.4276+ (rank 1)     |  | I [y6] - 694.3826+ (rank 2)   |
|              | G [y7] - 667.3865+ (rank 2)                                                                                  |  | E [y5] - 567.3592+ (rank 3)     |  | E [y4] - 452.2559+ (rank 3)   |
| <b>RAB18</b> | <b>IPI:IP100014577.1 SWISS-PROT:Q9NP72 RAB18 Ras-related protein Rab-18</b>                                  |  |                                 |  |                               |
|              | K.IIIGESGVGK.S [10, 20]                                                                                      |  | K.LAIWDTAGQER.F [58, 68]        |  | R.TLTPSYR.G [71, 78]          |
|              | 543.3319++                                                                                                   |  | 630.3226++                      |  | 500.7585++                    |
|              | I [y9] - 859.4884+ (rank 2)                                                                                  |  | W [y8] - 962.4326+ (rank 1)     |  | T [y6] - 786.3781+ (rank 2)   |
|              | I [y8] - 746.4043+ (rank 3)                                                                                  |  | D [y7] - 776.3533+ (rank 2)     |  | P [y5] - 685.3304+ (rank 1)   |
|              | G [y7] - 633.3202+ (rank 1)                                                                                  |  | G [y4] - 489.2416+ (rank 3)     |  | S [y4] - 588.2776+ (rank 3)   |
|              | 547.3390++ (heavy)                                                                                           |  | 633.3326++ (heavy)              |  | 503.7686++ (heavy)            |
|              | I [y9] - 867.5026+ (rank 2)                                                                                  |  | W [y8] - 968.4528+ (rank 1)     |  | T [y6] - 792.3982+ (rank 2)   |
|              | I [y8] - 754.4185+ (rank 3)                                                                                  |  | D [y7] - 782.3735+ (rank 2)     |  | P [y5] - 691.3505+ (rank 1)   |
|              | G [y7] - 641.3344+ (rank 1)                                                                                  |  | G [y4] - 495.2617+ (rank 3)     |  | S [y4] - 594.2978+ (rank 3)   |
|              | R.NDIVNMLVGNK.I [112, 122]                                                                                   |  |                                 |  |                               |
|              | 608.8214++                                                                                                   |  |                                 |  |                               |
|              | I [y9] - 987.5656+ (rank 3)                                                                                  |  |                                 |  |                               |
|              | V [y8] - 874.4815+ (rank 1)                                                                                  |  |                                 |  |                               |
|              | N [y7] - 775.4131+ (rank 2)                                                                                  |  |                                 |  |                               |
|              | 612.8285++ (heavy)                                                                                           |  |                                 |  |                               |
|              | I [y9] - 995.5798+ (rank 3)                                                                                  |  |                                 |  |                               |
|              | V [y8] - 882.4957+ (rank 1)                                                                                  |  |                                 |  |                               |
|              | N [y7] - 783.4273+ (rank 2)                                                                                  |  |                                 |  |                               |
| <b>RAB9B</b> | <b>IPI:IP100014603.1 SWISS-PROT:Q9NP90 RAB9B Ras-related protein Rab-9B</b>                                  |  |                                 |  |                               |
|              | K.VILLGDGGVVGK.S [9, 19]                                                                                     |  | R.QSFENLGNWQK.E [92, 102]       |  | K.EFIYYADV.K.D [103, 111]     |
|              | 514.3109++                                                                                                   |  | 675.8255++                      |  | 574.2871++                    |
|              | L [y9] - 815.4621+ (rank 1)                                                                                  |  | G [y5] - 632.3151+ (rank 1)     |  | Y [y6] - 758.3719+ (rank 1)   |
|              | L [y8] - 702.3781+ (rank 3)                                                                                  |  | N [y4] - 575.2936+ (rank 3)     |  | Y [y5] - 595.3086+ (rank 2)   |



|               |                                                                                             |                               |                               |
|---------------|---------------------------------------------------------------------------------------------|-------------------------------|-------------------------------|
|               | G [y7] - 589.2940+ (rank 2)                                                                 | W [y3] - 461.2507+ (rank 4)   | A [y4] - 432.2453+ (rank 3)   |
|               | 518.3180++ (heavy)                                                                          | 679.8326++ (heavy)            | 578.2942++ (heavy)            |
|               | L [y9] - 823.4763+ (rank 1)                                                                 | G [y5] - 640.3293+ (rank 1)   | Y [y6] - 766.3861+ (rank 1)   |
|               | L [y8] - 710.3923+ (rank 3)                                                                 | N [y4] - 583.3078+ (rank 3)   | Y [y5] - 603.3228+ (rank 2)   |
|               | G [y7] - 597.3082+ (rank 2)                                                                 | W [y3] - 469.2649+ (rank 4)   | A [y4] - 440.2595+ (rank 3)   |
| <b>RAP1B</b>  | <b>IPI:IP100015148.3 SWISS-PROT:P61224 RAP1B Ras-related protein Rap-1b</b>                 |                               |                               |
|               | K.DTDDVPMILVGNK.C [104, 116]                                                                | K.DTDDVPMILVGNK.C [104, 116]  | R.QWNNCAFLESSAK.S [136, 148]  |
|               | 708.8556++                                                                                  | 716.8530++                    | 777.8539++                    |
|               | P [y8] - 871.5070+ (rank 1)                                                                 | P [y8] - 887.5019+ (rank 1)   | A [y8] - 852.4462+ (rank 2)   |
|               | L [y5] - 530.3297+ (rank 2)                                                                 | L [y5] - 530.3297+ (rank 4)   | L [y6] - 634.3406+ (rank 1)   |
|               | V [y4] - 417.2456+ (rank 3)                                                                 | V [y4] - 417.2456+ (rank 3)   | E [y5] - 521.2566+ (rank 3)   |
|               | 712.8627++ (heavy)                                                                          | 720.8601++ (heavy)            | 781.8610++ (heavy)            |
|               | P [y8] - 879.5212+ (rank 1)                                                                 | P [y8] - 895.5161+ (rank 1)   | A [y8] - 860.4604+ (rank 2)   |
|               | L [y5] - 538.3439+ (rank 2)                                                                 | L [y5] - 538.3439+ (rank 4)   | L [y6] - 642.3548+ (rank 1)   |
|               | V [y4] - 425.2598+ (rank 3)                                                                 | V [y4] - 425.2598+ (rank 3)   | E [y5] - 529.2708+ (rank 3)   |
| <b>ARFRP1</b> | <b>IPI:IP100015178.1 SWISS-PROT:Q13795 ARFRP1 ADP-ribosylation factor-related protein 1</b> |                               |                               |
|               | K.TTFLEQSK.T [30, 37]                                                                       | K.ITTTVGLNIGTVDVGK.A [52, 67] | K.QDVETCLSLIPDIK.T [135, 147] |
|               | 477.2506++                                                                                  | 794.4512++                    | 759.3794++                    |
|               | F [y6] - 751.3985+ (rank 1)                                                                 | G [y11] - 1072.5997+ (rank 1) | E [y10] - 1175.5977+ (rank 5) |
|               | L [y5] - 604.3301+ (rank 2)                                                                 | N [y9] - 902.4942+ (rank 3)   | S [y6] - 672.3927+ (rank 4)   |
|               | E [y4] - 491.2460+ (rank 3)                                                                 | G [y7] - 675.3672+ (rank 2)   | P [y4] - 472.2766+ (rank 1)   |
|               | 481.2577++ (heavy)                                                                          | 798.4583++ (heavy)            | 763.3865++ (heavy)            |
|               | F [y6] - 759.4127+ (rank 1)                                                                 | G [y11] - 1080.6139+ (rank 1) | E [y10] - 1183.6119+ (rank 5) |
|               | L [y5] - 612.3443+ (rank 2)                                                                 | N [y9] - 910.5084+ (rank 3)   | S [y6] - 680.4069+ (rank 4)   |
|               | E [y4] - 499.2602+ (rank 3)                                                                 | G [y7] - 683.3814+ (rank 2)   | P [y4] - 480.2908+ (rank 1)   |
|               | K.TAFSDCTSK.I [148, 156]                                                                    | R.DCLTQACSAITGK.G [161, 173]  | R.EGIEWMVK.C [177, 184]       |
|               | 508.7213++                                                                                  | 712.8291++                    | 496.2495++                    |
|               | F [y7] - 844.3505+ (rank 1)                                                                 | T [y10] - 1036.5092+ (rank 1) | E [y5] - 692.3436+ (rank 2)   |
|               | S [y6] - 697.2821+ (rank 2)                                                                 | Q [y9] - 935.4615+ (rank 3)   | W [y4] - 563.3010+ (rank 3)   |
|               | C [y4] - 495.2232+ (rank 3)                                                                 | A [y8] - 807.4029+ (rank 2)   | M [y3] - 377.2217+ (rank 5)   |
|               | 512.7284++ (heavy)                                                                          | 716.8362++ (heavy)            | 500.2566++ (heavy)            |
|               | F [y7] - 852.3647+ (rank 1)                                                                 | T [y10] - 1044.5234+ (rank 1) | E [y5] - 700.3578+ (rank 2)   |
|               | S [y6] - 705.2963+ (rank 2)                                                                 | Q [y9] - 943.4757+ (rank 3)   | W [y4] - 571.3152+ (rank 3)   |
|               | C [y4] - 503.2374+ (rank 3)                                                                 | A [y8] - 815.4171+ (rank 2)   | M [y3] - 385.2359+ (rank 5)   |
| <b>RAB20</b>  | <b>IPI:IP100015839.1 SWISS-PROT:Q9NX57 RAB20 Ras-related protein Rab-20</b>                 |                               |                               |
|               | K.IVLLGDMNVGK.T [7, 17]                                                                     | R.GAAAILTYDVNHR.Q [71, 84]    | R.FLGLTDTASK.D [94, 103]      |
|               | 579.8312++                                                                                  | 505.2756+++                   | 526.7848++                    |
|               | L [y9] - 946.5026+ (rank 2)                                                                 | L [y8] - 1017.5112+ (rank 3)  | G [y8] - 792.4098+ (rank 1)   |
|               | L [y8] - 833.4186+ (rank 3)                                                                 | T [y7] - 904.4272+ (rank 1)   | T [y6] - 622.3042+ (rank 2)   |
|               | G [y7] - 720.3345+ (rank 1)                                                                 | V [y4] - 525.2892+ (rank 4)   | T [y4] - 406.2296+ (rank 4)   |
|               | 583.8383++ (heavy)                                                                          | 507.2823+++ (heavy)           | 530.7919++ (heavy)            |
|               | L [y9] - 954.5168+ (rank 2)                                                                 | L [y8] - 1023.5313+ (rank 3)  | G [y8] - 800.4240+ (rank 1)   |
|               | L [y8] - 841.4328+ (rank 3)                                                                 | T [y7] - 910.4473+ (rank 1)   | T [y6] - 630.3184+ (rank 2)   |
|               | G [y7] - 728.3487+ (rank 1)                                                                 | V [y4] - 531.3093+ (rank 4)   | T [y4] - 414.2438+ (rank 4)   |
|               | K.QVQLEDAVALYK.K [147, 158]                                                                 |                               |                               |
|               | 688.8746++                                                                                  |                               |                               |
|               | L [y9] - 1021.5564+ (rank 5)                                                                |                               |                               |
|               | E [y8] - 908.4724+ (rank 2)                                                                 |                               |                               |
|               | A [y4] - 494.2973+ (rank 3)                                                                 |                               |                               |
|               | 692.8817++ (heavy)                                                                          |                               |                               |
|               | L [y9] - 1029.5706+ (rank 5)                                                                |                               |                               |
|               | E [y8] - 916.4866+ (rank 2)                                                                 |                               |                               |
|               | A [y4] - 502.3115+ (rank 3)                                                                 |                               |                               |
| <b>SAR1A</b>  | <b>IPI:IP100015954.1 SWISS-PROT:Q9NR31 SAR1A GTP-binding protein SAR1a</b>                  |                               |                               |
|               | K.NYLPAINGIVFLVDCADHSR.L [87, 106]                                                          | R.TDAISEEK.L [138, 145]       | R.EIFGLYGQTTGK.G [148, 159]   |
|               | 1137.5704++                                                                                 | 446.7165++                    | 657.3404++                    |
|               | L [y9] - 1072.4840+ (rank 1)                                                                | A [y6] - 676.3512+ (rank 1)   | G [y9] - 924.4785+ (rank 3)   |
|               | V [y8] - 959.4000+ (rank 4)                                                                 | I [y5] - 605.3141+ (rank 3)   | Y [y7] - 754.3730+ (rank 1)   |
|               | C [y6] - 745.3046+ (rank 2)                                                                 | S [y4] - 492.2300+ (rank 2)   | G [y6] - 591.3097+ (rank 2)   |
|               | 1140.5805++ (heavy)                                                                         | 450.7236++ (heavy)            | 661.3475++ (heavy)            |
|               | L [y9] - 1078.5041+ (rank 1)                                                                | A [y6] - 684.3654+ (rank 1)   | G [y9] - 932.4927+ (rank 3)   |
|               | V [y8] - 965.4201+ (rank 4)                                                                 | I [y5] - 613.3283+ (rank 3)   | Y [y7] - 762.3872+ (rank 1)   |
|               | C [y6] - 751.3247+ (rank 2)                                                                 | S [y4] - 500.2442+ (rank 2)   | G [y6] - 599.3239+ (rank 2)   |
| <b>RAB5C</b>  | <b>IPI:IP100016339.4 SWISS-PROT:P51148 RAB5C Ras-related protein Rab-5C</b>                 |                               |                               |
|               | R.QASPNIVIALAGNK.A [121, 134]                                                               | K.NEPQNATGAPGR.N [184, 195]   | R.GVDLQENNPASR.S [198, 209]   |
|               | 698.4014++                                                                                  | 606.2918++                    | 650.3180++                    |
|               | V [y8] - 785.4880+ (rank 1)                                                                 | P [y10] - 968.4908+ (rank 1)  | Q [y8] - 915.4279+ (rank 3)   |
|               | I [y7] - 686.4196+ (rank 2)                                                                 | T [y6] - 558.2994+ (rank 3)   | E [y7] - 787.3693+ (rank 2)   |
|               | A [y6] - 573.3355+ (rank 3)                                                                 | P [y3] - 329.1932+ (rank 2)   | P [y4] - 430.2409+ (rank 1)   |
|               | 702.4085++ (heavy)                                                                          | 609.3019++ (heavy)            | 653.3281++ (heavy)            |
|               | V [y8] - 793.5022+ (rank 1)                                                                 | P [y10] - 974.5109+ (rank 1)  | Q [y8] - 921.4480+ (rank 3)   |
|               | I [y7] - 694.4337+ (rank 2)                                                                 | T [y6] - 564.3196+ (rank 3)   | E [y7] - 793.3894+ (rank 2)   |
|               | A [y6] - 581.3497+ (rank 3)                                                                 | P [y3] - 335.2133+ (rank 2)   | P [y4] - 436.2610+ (rank 1)   |
| <b>RAB7A</b>  | <b>IPI:IP100016342.1 SWISS-PROT:P51149 RAB7A Ras-related protein Rab-7a</b>                 |                               |                               |
|               | R.FQSLGVAFYR.G [69, 78]                                                                     | R.DEFLIQASPR.D [103, 112]     | R.AQAWCYSK.N [138, 145]       |
|               | 594.3140++                                                                                  | 588.3064++                    | 507.2291++                    |
|               | S [y8] - 912.4938+ (rank 1)                                                                 | I [y6] - 671.3835+ (rank 4)   | A [y6] - 814.3552+ (rank 1)   |

|               |                                                                                                 |  |                               |  |                                |
|---------------|-------------------------------------------------------------------------------------------------|--|-------------------------------|--|--------------------------------|
|               | G [y6] - 712.3777+ (rank 2)                                                                     |  | Q [y5] - 558.2994+ (rank 3)   |  | C [y4] - 557.2388+ (rank 2)    |
|               | A [y4] - 556.2878+ (rank 3)                                                                     |  | S [y3] - 359.2037+ (rank 2)   |  | Y [y3] - 397.2082+ (rank 3)    |
|               | 597.3241++ (heavy)                                                                              |  | 591.3165++ (heavy)            |  | 511.2362++ (heavy)             |
|               | S [y8] - 918.5139+ (rank 1)                                                                     |  | I [y6] - 677.4036+ (rank 4)   |  | A [y6] - 822.3694+ (rank 1)    |
|               | G [y6] - 718.3978+ (rank 2)                                                                     |  | Q [y5] - 564.3196+ (rank 3)   |  | C [y4] - 565.2530+ (rank 2)    |
|               | A [y4] - 562.3079+ (rank 3)                                                                     |  | S [y3] - 365.2239+ (rank 2)   |  | Y [y3] - 405.2224+ (rank 3)    |
|               | K.NNIPYFETSAK.E [146, 156]                                                                      |  | K.EAINVEQAFQTIAR.N [157, 170] |  |                                |
|               | 642.3170++                                                                                      |  | 795.4177++                    |  |                                |
|               | I [y9] - 1055.5408+ (rank 2)                                                                    |  | E [y9] - 1063.5531+ (rank 1)  |  |                                |
|               | P [y8] - 942.4567+ (rank 1)                                                                     |  | Q [y8] - 934.5105+ (rank 3)   |  |                                |
|               | Y [y7] - 845.4040+ (rank 3)                                                                     |  | F [y6] - 735.4148+ (rank 2)   |  |                                |
|               | 646.3241++ (heavy)                                                                              |  | 798.4278++ (heavy)            |  |                                |
|               | I [y9] - 1063.5550+ (rank 2)                                                                    |  | E [y9] - 1069.5732+ (rank 1)  |  |                                |
|               | P [y8] - 950.4709+ (rank 1)                                                                     |  | Q [y8] - 940.5306+ (rank 3)   |  |                                |
|               | Y [y7] - 853.4182+ (rank 3)                                                                     |  | F [y6] - 741.4349+ (rank 2)   |  |                                |
| <b>RAB9A</b>  | <b>IPI:IP100016372.1 SWISS-PROT:P51151 RAB9A Ras-related protein Rab-9A</b>                     |  |                               |  |                                |
|               | R.QVSTEEAQAWCR.D [131, 142]                                                                     |  | K.DATNVAAAFEEAVR.R [156, 169] |  | R.SDHLIQTDTVNLHR.K [178, 191]  |
|               | 732.8304++                                                                                      |  | 732.3599++                    |  | 824.9237++                     |
|               | A [y6] - 791.3617+ (rank 4)                                                                     |  | A [y9] - 963.4894+ (rank 1)   |  | I [y10] - 1196.6382+ (rank 3)  |
|               | A [y4] - 592.2660+ (rank 2)                                                                     |  | A [y7] - 821.4152+ (rank 2)   |  | Q [y9] - 1083.5541+ (rank 1)   |
|               | W [y3] - 521.2289+ (rank 1)                                                                     |  | F [y6] - 750.3781+ (rank 3)   |  | T [y8] - 955.4956+ (rank 2)    |
|               | 735.8405++ (heavy)                                                                              |  | 735.3700++ (heavy)            |  | 827.9338++ (heavy)             |
|               | A [y6] - 797.3818+ (rank 4)                                                                     |  | A [y9] - 969.5096+ (rank 1)   |  | I [y10] - 1202.6583+ (rank 3)  |
|               | A [y4] - 598.2862+ (rank 2)                                                                     |  | A [y7] - 827.4353+ (rank 2)   |  | Q [y9] - 1089.5743+ (rank 1)   |
|               | W [y3] - 527.2490+ (rank 1)                                                                     |  | F [y6] - 756.3982+ (rank 3)   |  | T [y8] - 961.5157+ (rank 2)    |
|               |                                                                                                 |  | 488.5757+++                   |  |                                |
|               |                                                                                                 |  | F [y6] - 750.3781+ (rank 3)   |  |                                |
|               |                                                                                                 |  | E [y5] - 603.3097+ (rank 1)   |  |                                |
|               |                                                                                                 |  | E [y4] - 474.2671+ (rank 2)   |  |                                |
|               |                                                                                                 |  | 490.5824+++ (heavy)           |  |                                |
|               |                                                                                                 |  | F [y6] - 756.3982+ (rank 3)   |  |                                |
|               |                                                                                                 |  | E [y5] - 609.3298+ (rank 1)   |  |                                |
|               |                                                                                                 |  | E [y4] - 480.2872+ (rank 2)   |  |                                |
| <b>RAB13</b>  | <b>IPI:IP100016373.3 SWISS-PROT:P51153 RAB13 Ras-related protein Rab-13</b>                     |  |                               |  |                                |
|               | K.LQVWDTAGQER.F [58, 68]                                                                        |  | K.SFENIQNWMK.S [94, 103]      |  | K.ENASAGVER.L [107, 115]       |
|               | 651.8255++                                                                                      |  | 648.8057++                    |  | 466.7252++                     |
|               | V [y9] - 1061.5010+ (rank 1)                                                                    |  | E [y8] - 1062.5037+ (rank 3)  |  | S [y6] - 618.3206+ (rank 3)    |
|               | W [y8] - 962.4326+ (rank 2)                                                                     |  | Q [y5] - 706.3341+ (rank 1)   |  | A [y5] - 531.2885+ (rank 2)    |
|               | G [y4] - 489.2416+ (rank 3)                                                                     |  | N [y4] - 578.2755+ (rank 2)   |  | G [y4] - 460.2514+ (rank 1)    |
|               | 654.8355++ (heavy)                                                                              |  | 652.8128++ (heavy)            |  | 469.7353++ (heavy)             |
|               | V [y9] - 1067.5212+ (rank 1)                                                                    |  | E [y8] - 1070.5179+ (rank 3)  |  | S [y6] - 624.3407+ (rank 3)    |
|               | W [y8] - 968.4528+ (rank 2)                                                                     |  | Q [y5] - 714.3483+ (rank 1)   |  | A [y5] - 537.3087+ (rank 2)    |
|               | G [y4] - 495.2617+ (rank 3)                                                                     |  | N [y4] - 586.2897+ (rank 2)   |  | G [y4] - 466.2716+ (rank 1)    |
| <b>RAB28</b>  | <b>IPI:IP100016377.2 SWISS-PROT:P51157-1 RAB28 Isoform S of Ras-related protein Rab-28</b>      |  |                               |  |                                |
|               | K.IVVLGDGASGK.T [14, 24]                                                                        |  | K.TSLTTCFAQETFGK.Q [25, 38]   |  | K.VSEESQPLVALVGNK.I [113, 129] |
|               | 508.2928++                                                                                      |  | 795.8771++                    |  | 900.4729++                     |
|               | V [y9] - 803.4258+ (rank 1)                                                                     |  | T [y10] - 1188.5354+ (rank 2) |  | T [y11] - 1139.6783+ (rank 3)  |
|               | L [y8] - 704.3573+ (rank 3)                                                                     |  | C [y9] - 1087.4877+ (rank 1)  |  | P [y9] - 910.5720+ (rank 1)    |
|               | G [y7] - 591.2733+ (rank 2)                                                                     |  | A [y7] - 780.3886+ (rank 3)   |  | A [y6] - 601.3668+ (rank 2)    |
|               | 512.2999++ (heavy)                                                                              |  | 799.8842++ (heavy)            |  | 904.4800++ (heavy)             |
|               | V [y9] - 811.4400+ (rank 1)                                                                     |  | T [y10] - 1196.5496+ (rank 2) |  | T [y11] - 1147.6925+ (rank 3)  |
|               | L [y8] - 712.3715+ (rank 3)                                                                     |  | C [y9] - 1095.5019+ (rank 1)  |  | P [y9] - 918.5862+ (rank 1)    |
|               | G [y7] - 599.2875+ (rank 2)                                                                     |  | A [y7] - 788.4028+ (rank 3)   |  | A [y6] - 609.3810+ (rank 2)    |
|               | K.VAAEILGIK.L [172, 180]                                                                        |  | K.AEIEQSQR.V [184, 191]       |  | K.ADIVNYNQEPMSR.T [195, 207]   |
|               | 457.2895++                                                                                      |  | 480.7409++                    |  | 768.8592++                     |
|               | A [y8] - 814.5033+ (rank 2)                                                                     |  | I [y6] - 760.3948+ (rank 2)   |  | N [y9] - 1138.4946+ (rank 3)   |
|               | A [y7] - 743.4662+ (rank 1)                                                                     |  | E [y5] - 647.3107+ (rank 1)   |  | E [y5] - 619.2868+ (rank 2)    |
|               | E [y6] - 672.4291+ (rank 3)                                                                     |  | Q [y4] - 518.2681+ (rank 3)   |  | P [y4] - 490.2442+ (rank 1)    |
|               | 461.2966++ (heavy)                                                                              |  | 483.7510++ (heavy)            |  | 771.8693++ (heavy)             |
|               | A [y8] - 822.5175+ (rank 2)                                                                     |  | I [y6] - 766.4149+ (rank 2)   |  | N [y9] - 1144.5147+ (rank 3)   |
|               | A [y7] - 751.4804+ (rank 1)                                                                     |  | E [y5] - 653.3309+ (rank 1)   |  | E [y5] - 625.3070+ (rank 2)    |
|               | E [y6] - 680.4433+ (rank 3)                                                                     |  | Q [y4] - 524.2883+ (rank 3)   |  | P [y4] - 496.2644+ (rank 1)    |
| <b>RAB27A</b> | <b>IPI:IP100016381.2 SWISS-PROT:P51159-1 RAB27A Isoform Long of Ras-related protein Rab-27A</b> |  |                               |  |                                |
|               | K.FLALGDSGVGK.T [11, 21]                                                                        |  | K.TSVLYQYTDGK.F [22, 32]      |  | R.IHLQLWDTAGQER.F [67, 79]     |
|               | 532.2928++                                                                                      |  | 637.8168++                    |  | 783.9048++                     |
|               | A [y9] - 803.4258+ (rank 1)                                                                     |  | L [y8] - 987.4782+ (rank 2)   |  | L [y9] - 1075.5167+ (rank 4)   |
|               | L [y8] - 732.3886+ (rank 3)                                                                     |  | Y [y7] - 874.3941+ (rank 1)   |  | W [y8] - 962.4326+ (rank 1)    |
|               | G [y7] - 619.3046+ (rank 2)                                                                     |  | Q [y6] - 711.3308+ (rank 3)   |  | D [y7] - 776.3533+ (rank 3)    |
|               | 536.2999++ (heavy)                                                                              |  | 641.8239++ (heavy)            |  | 786.9149++ (heavy)             |
|               | A [y9] - 811.4400+ (rank 1)                                                                     |  | L [y8] - 995.4924+ (rank 2)   |  | L [y9] - 1081.5368+ (rank 4)   |
|               | L [y8] - 740.4028+ (rank 3)                                                                     |  | Y [y7] - 882.4083+ (rank 1)   |  | W [y8] - 968.4528+ (rank 1)    |
|               | G [y7] - 627.3188+ (rank 2)                                                                     |  | Q [y6] - 719.3450+ (rank 3)   |  | D [y7] - 782.3735+ (rank 3)    |
|               | K.SDLEDQR.V [134, 140]                                                                          |  | K.SWIPEGVVR.S [191, 199]      |  |                                |
|               | 431.6987++                                                                                      |  | 521.7876++                    |  |                                |
|               | L [y5] - 660.3311+ (rank 3)                                                                     |  | I [y7] - 769.4567+ (rank 5)   |  |                                |
|               | E [y4] - 547.2471+ (rank 2)                                                                     |  | P [y6] - 656.3726+ (rank 2)   |  |                                |
|               | D [y3] - 418.2045+ (rank 4)                                                                     |  | G [y4] - 430.2772+ (rank 3)   |  |                                |

|              |                                                                                                          |  |                                  |  |                                 |
|--------------|----------------------------------------------------------------------------------------------------------|--|----------------------------------|--|---------------------------------|
|              | 434.7088++ (heavy)                                                                                       |  | 524.7977++ (heavy)               |  |                                 |
|              | L [y5] - 666.3513+ (rank 3)                                                                              |  | I [y7] - 775.4768+ (rank 5)      |  |                                 |
|              | E [y4] - 553.2672+ (rank 2)                                                                              |  | P [y6] - 662.3927+ (rank 2)      |  |                                 |
|              | D [y3] - 424.2246+ (rank 4)                                                                              |  | G [y4] - 436.2974+ (rank 3)      |  |                                 |
| <b>RAB10</b> | <b>IPI:IP100016513.5 SWISS-PROT:P61026 RAB10 Ras-related protein Rab-10</b>                              |  |                                  |  |                                 |
|              | K.TYDLLFK.L [4, 10]                                                                                      |  | R.FHTITTSYYR.G [70, 79]          |  | R.NIDEHANEDVER.M [105, 116]     |
|              | 450.2473++                                                                                               |  | 644.8197++                       |  | 720.8211++                      |
|              | Y [y6] - 798.4396+ (rank 3)                                                                              |  | T [y8] - 1004.5047+ (rank 1)     |  | H [y8] - 969.4384+ (rank 1)     |
|              | D [y5] - 635.3763+ (rank 1)                                                                              |  | I [y7] - 903.4571+ (rank 3)      |  | A [y7] - 832.3795+ (rank 3)     |
|              | L [y4] - 520.3493+ (rank 4)                                                                              |  | T [y6] - 790.3730+ (rank 2)      |  | N [y6] - 761.3424+ (rank 4)     |
|              | 454.2544++ (heavy)                                                                                       |  | 647.8297++ (heavy)               |  | 723.8312++ (heavy)              |
|              | Y [y6] - 806.4538+ (rank 3)                                                                              |  | T [y8] - 1010.5249+ (rank 1)     |  | H [y8] - 975.4586+ (rank 1)     |
|              | D [y5] - 643.3905+ (rank 1)                                                                              |  | I [y7] - 909.4772+ (rank 3)      |  | A [y7] - 838.3997+ (rank 3)     |
|              | L [y4] - 528.3635+ (rank 4)                                                                              |  | T [y6] - 796.3931+ (rank 2)      |  | N [y6] - 767.3626+ (rank 4)     |
| <b>RHEB</b>  | <b>IPI:IP100016669.1 SWISS-PROT:Q15382 RHEB GTP-binding protein Rheb</b>                                 |  |                                  |  |                                 |
|              | K.IAILGYR.S [8, 14]                                                                                      |  | K.VQIPIMLVGNK.K [109, 119]       |  | K.ALAESWNAAFLESSAK.E [135, 150] |
|              | 403.2502++                                                                                               |  | 606.3627++                       |  | 847.9229++                      |
|              | A [y6] - 692.4090+ (rank 4)                                                                              |  | I [y9] - 984.5910+ (rank 2)      |  | N [y10] - 1037.5262+ (rank 1)   |
|              | I [y5] - 621.3719+ (rank 1)                                                                              |  | P [y8] - 871.5070+ (rank 1)      |  | A [y9] - 923.4833+ (rank 2)     |
|              | L [y4] - 508.2878+ (rank 3)                                                                              |  | V [y4] - 417.2456+ (rank 3)      |  | F [y7] - 781.4090+ (rank 4)     |
|              | 406.2602++ (heavy)                                                                                       |  | 610.3698++ (heavy)               |  | 851.9300++ (heavy)              |
|              | A [y6] - 698.4291+ (rank 4)                                                                              |  | I [y9] - 992.6052+ (rank 2)      |  | N [y10] - 1045.5404+ (rank 1)   |
|              | I [y5] - 627.3920+ (rank 1)                                                                              |  | P [y8] - 879.5212+ (rank 1)      |  | A [y9] - 931.4975+ (rank 2)     |
|              | L [y4] - 514.3079+ (rank 3)                                                                              |  | V [y4] - 425.2598+ (rank 3)      |  | F [y7] - 789.4232+ (rank 4)     |
|              | K.ENQTAVDVF.R [151, 160]                                                                                 |  |                                  |  |                                 |
|              | 589.7937++                                                                                               |  |                                  |  |                                 |
|              | A [y6] - 706.3883+ (rank 3)                                                                              |  |                                  |  |                                 |
|              | V [y5] - 635.3511+ (rank 2)                                                                              |  |                                  |  |                                 |
|              | D [y4] - 536.2827+ (rank 1)                                                                              |  |                                  |  |                                 |
|              | 592.8037++ (heavy)                                                                                       |  |                                  |  |                                 |
|              | A [y6] - 712.4084+ (rank 3)                                                                              |  |                                  |  |                                 |
|              | V [y5] - 641.3713+ (rank 2)                                                                              |  |                                  |  |                                 |
|              | D [y4] - 542.3029+ (rank 1)                                                                              |  |                                  |  |                                 |
| <b>CDC42</b> | <b>IPI:IP100016786.1 SWISS-PROT:P60953-2 CDC42 Isoform 2 of Cell division control protein 42 homolog</b> |  |                                  |  |                                 |
|              | K.YVECSALTQK.G [153, 162]                                                                                |  | K.NVFDEAILAALEPPEPK.K [166, 182] |  |                                 |
|              | 599.7923++                                                                                               |  | 926.9882++                       |  |                                 |
|              | E [y8] - 936.4455+ (rank 1)                                                                              |  | A [y8] - 880.4775+ (rank 3)      |  |                                 |
|              | C [y7] - 807.4029+ (rank 2)                                                                              |  | E [y6] - 696.3563+ (rank 2)      |  |                                 |
|              | T [y3] - 376.2191+ (rank 3)                                                                              |  | P [y5] - 567.3137+ (rank 1)      |  |                                 |
|              | 603.7994++ (heavy)                                                                                       |  | 930.9953++ (heavy)               |  |                                 |
|              | E [y8] - 944.4597+ (rank 1)                                                                              |  | A [y8] - 888.4917+ (rank 3)      |  |                                 |
|              | C [y7] - 815.4171+ (rank 2)                                                                              |  | E [y6] - 704.3705+ (rank 2)      |  |                                 |
|              | T [y3] - 384.2333+ (rank 3)                                                                              |  | P [y5] - 575.3279+ (rank 1)      |  |                                 |
|              |                                                                                                          |  | 618.3279+++                      |  |                                 |
|              |                                                                                                          |  | L [y7] - 809.4403+ (rank 3)      |  |                                 |
|              |                                                                                                          |  | E [y6] - 696.3563+ (rank 2)      |  |                                 |
|              |                                                                                                          |  | P [y5] - 567.3137+ (rank 1)      |  |                                 |
|              |                                                                                                          |  | 620.9993+++ (heavy)              |  |                                 |
|              |                                                                                                          |  | L [y7] - 817.4545+ (rank 3)      |  |                                 |
|              |                                                                                                          |  | E [y6] - 704.3705+ (rank 2)      |  |                                 |
|              |                                                                                                          |  | P [y5] - 575.3279+ (rank 1)      |  |                                 |
| <b>RAB6B</b> | <b>IPI:IP100016891.1 SWISS-PROT:Q9NRW1 RAB6B Ras-related protein Rab-6B</b>                              |  |                                  |  |                                 |
|              | R.QITIEEGEQR.A [134, 143]                                                                                |  | K.ELSMFIETSAK.T [146, 157]       |  | R.VASALPGMENVQEK.S [169, 182]   |
|              | 601.8042++                                                                                               |  | 677.8498++                       |  | 736.8743++                      |
|              | T [y8] - 961.4585+ (rank 1)                                                                              |  | M [y8] - 926.4652+ (rank 1)      |  | L [y10] - 1144.5667+ (rank 2)   |
|              | E [y6] - 747.3268+ (rank 2)                                                                              |  | F [y7] - 795.4247+ (rank 2)      |  | P [y9] - 1031.4826+ (rank 1)    |
|              | E [y5] - 618.2842+ (rank 3)                                                                              |  | I [y6] - 648.3563+ (rank 3)      |  | G [y8] - 934.4299+ (rank 3)     |
|              | 604.8143++ (heavy)                                                                                       |  | 681.8569++ (heavy)               |  | 740.8814++ (heavy)              |
|              | T [y8] - 967.4786+ (rank 1)                                                                              |  | M [y8] - 934.4794+ (rank 1)      |  | L [y10] - 1152.5809+ (rank 2)   |
|              | E [y6] - 753.3469+ (rank 2)                                                                              |  | F [y7] - 803.4389+ (rank 2)      |  | P [y9] - 1039.4968+ (rank 1)    |
|              | E [y5] - 624.3043+ (rank 3)                                                                              |  | I [y6] - 656.3705+ (rank 3)      |  | G [y8] - 942.4441+ (rank 3)     |
|              | R.VASALPGMENVQEK.S [169, 182]                                                                            |  |                                  |  |                                 |
|              | 744.8718++                                                                                               |  |                                  |  |                                 |
|              | P [y9] - 1047.4775+ (rank 1)                                                                             |  |                                  |  |                                 |
|              | G [y8] - 950.4248+ (rank 2)                                                                              |  |                                  |  |                                 |
|              | V [y4] - 503.2824+ (rank 3)                                                                              |  |                                  |  |                                 |
|              | 748.8789++ (heavy)                                                                                       |  |                                  |  |                                 |
|              | P [y9] - 1055.4917+ (rank 1)                                                                             |  |                                  |  |                                 |
|              | G [y8] - 958.4390+ (rank 2)                                                                              |  |                                  |  |                                 |
|              | V [y4] - 511.2966+ (rank 3)                                                                              |  |                                  |  |                                 |
| <b>RHOG</b>  | <b>IPI:IP100017342.1 SWISS-PROT:P84095 RHOG Rho-related GTP-binding protein RhoG</b>                     |  |                                  |  |                                 |
|              | R.TVNLNLWDTAGQEEYDR.L [49, 65]                                                                           |  | K.EQGQAPITPQQGQALAK.Q [130, 146] |  | R.YLECSALQQDGVK.E [153, 165]    |
|              | 1012.4714++                                                                                              |  | 882.9656++                       |  | 755.8639++                      |
|              | D [y10] - 1183.4862+ (rank 2)                                                                            |  | P [y12] - 1251.7056+ (rank 1)    |  | C [y10] - 1105.5306+ (rank 3)   |
|              | T [y9] - 1068.4592+ (rank 4)                                                                             |  | T [y10] - 1041.5687+ (rank 2)    |  | L [y7] - 787.4308+ (rank 2)     |
|              | G [y7] - 896.3745+ (rank 1)                                                                              |  | P [y9] - 940.5211+ (rank 3)      |  | Q [y6] - 674.3468+ (rank 1)     |
|              | 1015.4815++ (heavy)                                                                                      |  | 886.9727++ (heavy)               |  | 759.8710++ (heavy)              |

|              |                                                                                                                       |                                                        |                                              |
|--------------|-----------------------------------------------------------------------------------------------------------------------|--------------------------------------------------------|----------------------------------------------|
|              | D [y10] - 1189.5063+ (rank 2)                                                                                         | P [y12] - 1259.7198+ (rank 1)                          | C [y10] - 1113.5448+ (rank 3)                |
|              | T [y9] - 1074.4794+ (rank 4)                                                                                          | T [y10] - 1049.5829+ (rank 2)                          | L [y7] - 795.4450+ (rank 2)                  |
|              | G [y7] - 902.3946+ (rank 1)                                                                                           | P [y9] - 948.5353+ (rank 3)                            | Q [y6] - 682.3610+ (rank 1)                  |
| <b>RAB5B</b> | <b>IPI:IP100017344.3 SWISS-PROT:P61020 RAB5B Ras-related protein Rab-5B</b>                                           |                                                        |                                              |
|              | R.QASPSVIALAGN <b>K</b> .A [120, 133]                                                                                 | K.TAMNVNDLFLAIA <b>K</b> .K [165, 178]                 | K.SEPQNLGGAAG <b>R</b> .S [183, 194]         |
|              | 684.8959++                                                                                                            | 760.9107++                                             | 578.7889++                                   |
|              | P [y11] - 1082.6568+ (rank 2)                                                                                         | N [y11] - 1217.6888+ (rank 2)                          | P [y10] - 940.4959+ (rank 2)                 |
|              | V [y8] - 785.4880+ (rank 1)                                                                                           | V [y10] - 1103.6459+ (rank 3)                          | L [y7] - 601.3416+ (rank 3)                  |
|              | A [y6] - 573.3355+ (rank 3)                                                                                           | N [y9] - 1004.5775+ (rank 1)                           | G [y6] - 488.2576+ (rank 1)                  |
|              | 688.9030++ (heavy)                                                                                                    | 764.9178++ (heavy)                                     | 581.7990++ (heavy)                           |
|              | P [y11] - 1090.6710+ (rank 2)                                                                                         | N [y11] - 1225.7030+ (rank 2)                          | P [y10] - 946.5160+ (rank 2)                 |
|              | V [y8] - 793.5022+ (rank 1)                                                                                           | V [y10] - 1111.6601+ (rank 3)                          | L [y7] - 607.3618+ (rank 3)                  |
|              | A [y6] - 581.3497+ (rank 3)                                                                                           | N [y9] - 1012.5917+ (rank 1)                           | G [y6] - 494.2777+ (rank 1)                  |
|              | R.GVDLHEQSQQN <b>K</b> .S [197, 208]                                                                                  |                                                        |                                              |
|              | 691.8366++                                                                                                            |                                                        |                                              |
|              | H [y8] - 998.4650+ (rank 2)                                                                                           |                                                        |                                              |
|              | E [y7] - 861.4061+ (rank 1)                                                                                           |                                                        |                                              |
|              | S [y5] - 604.3049+ (rank 3)                                                                                           |                                                        |                                              |
|              | 695.8437++ (heavy)                                                                                                    |                                                        |                                              |
|              | H [y8] - 1006.4792+ (rank 2)                                                                                          |                                                        |                                              |
|              | E [y7] - 869.4203+ (rank 1)                                                                                           |                                                        |                                              |
|              | S [y5] - 612.3191+ (rank 3)                                                                                           |                                                        |                                              |
| <b>RAP2B</b> | <b>IPI:IP100018364.2 SWISS-PROT:P61225 RAP2B Ras-related protein Rap-2b</b>                                           |                                                        |                                              |
|              | R.VPMILVGN <b>K</b> .V [108, 116]                                                                                     | R.VPMILVGN <b>K</b> .V [108, 116]                      | K.VDLEGER <b>E</b> .E [117, 123]             |
|              | 485.7913++                                                                                                            | 493.7888++                                             | 409.2061++                                   |
|              | M [y7] - 774.4542+ (rank 1)                                                                                           | P [y8] - 887.5019+ (rank 1)                            | D [y6] - 718.3366+ (rank 1)                  |
|              | I [y6] - 643.4137+ (rank 2)                                                                                           | I [y6] - 643.4137+ (rank 2)                            | L [y5] - 603.3097+ (rank 2)                  |
|              | L [y5] - 530.3297+ (rank 3)                                                                                           | L [y5] - 530.3297+ (rank 3)                            | G [y3] - 361.1830+ (rank 3)                  |
|              | 489.7984++ (heavy)                                                                                                    | 497.7959++ (heavy)                                     | 412.2162++ (heavy)                           |
|              | M [y7] - 782.4684+ (rank 1)                                                                                           | P [y8] - 895.5161+ (rank 1)                            | D [y6] - 724.3567+ (rank 1)                  |
|              | I [y6] - 651.4279+ (rank 2)                                                                                           | I [y6] - 651.4279+ (rank 2)                            | L [y5] - 609.3298+ (rank 2)                  |
|              | L [y5] - 538.3439+ (rank 3)                                                                                           | L [y5] - 538.3439+ (rank 3)                            | G [y3] - 367.2031+ (rank 3)                  |
|              | K.ASVDELFAEIV <b>R</b> .Q [150, 161]                                                                                  |                                                        |                                              |
|              | 674.8590++                                                                                                            |                                                        |                                              |
|              | F [y6] - 734.4196+ (rank 1)                                                                                           |                                                        |                                              |
|              | A [y5] - 587.3511+ (rank 2)                                                                                           |                                                        |                                              |
|              | E [y4] - 516.3140+ (rank 3)                                                                                           |                                                        |                                              |
|              | 677.8691++ (heavy)                                                                                                    |                                                        |                                              |
|              | F [y6] - 740.4397+ (rank 1)                                                                                           |                                                        |                                              |
|              | A [y5] - 593.3713+ (rank 2)                                                                                           |                                                        |                                              |
|              | E [y4] - 522.3342+ (rank 3)                                                                                           |                                                        |                                              |
| <b>ARL8B</b> | <b>IPI:IP100018871.2 TREMBL:B4E1J8 ARL8B cDNA FLJ56285, highly similar to ADP-ribosylation factor-like protein 8B</b> |                                                        |                                              |
|              | R.DLPNALDE <b>K</b> .Q [184, 192]                                                                                     | K.MNLSAIQD <b>R</b> .E [198, 206]                      | R.EI <b>CC</b> YSIS <b>CK</b> .E [207, 216]  |
|              | 507.7587++                                                                                                            | 524.2662++                                             | 660.2751++                                   |
|              | P [y7] - 786.3992+ (rank 1)                                                                                           | L [y7] - 802.4417+ (rank 2)                            | C [y7] - 917.3856+ (rank 3)                  |
|              | N [y6] - 689.3464+ (rank 2)                                                                                           | S [y6] - 689.3577+ (rank 1)                            | S [y5] - 594.2916+ (rank 2)                  |
|              | E [y2] - 276.1554+ (rank 3)                                                                                           | A [y5] - 602.3257+ (rank 3)                            | S [y3] - 394.1755+ (rank 1)                  |
|              | 511.7658++ (heavy)                                                                                                    | 527.2763++ (heavy)                                     | 664.2822++ (heavy)                           |
|              | P [y7] - 794.4134+ (rank 1)                                                                                           | L [y7] - 808.4619+ (rank 2)                            | C [y7] - 925.3997+ (rank 3)                  |
|              | N [y6] - 697.3606+ (rank 2)                                                                                           | S [y6] - 695.3778+ (rank 1)                            | S [y5] - 602.3058+ (rank 2)                  |
|              | E [y2] - 284.1696+ (rank 3)                                                                                           | A [y5] - 608.3458+ (rank 3)                            | S [y3] - 402.1897+ (rank 1)                  |
| <b>RHOH</b>  | <b>IPI:IP100018882.1 SWISS-PROT:Q15669 RHOH Rho-related GTP-binding protein RhoH</b>                                  |                                                        |                                              |
|              | R.SNLP <b>C</b> TPVLVATQTDQ <b>R</b> .E [103, 120]                                                                    | R.A <b>SC</b> VNAMEG <b>K</b> .K [127, 136]            | K.GYLE <b>CS</b> ALS <b>NR</b> .G [146, 156] |
|              | 1000.0175++                                                                                                           | 533.7364++                                             | 635.2982++                                   |
|              | P [y12] - 1326.7376+ (rank 1)                                                                                         | V [y7] - 748.3658+ (rank 2)                            | E [y8] - 936.4204+ (rank 2)                  |
|              | V [y9] - 1017.5323+ (rank 4)                                                                                          | N [y6] - 649.2974+ (rank 1)                            | C [y7] - 807.3778+ (rank 1)                  |
|              | V [y8] - 918.4639+ (rank 2)                                                                                           | E [y3] - 333.1769+ (rank 5)                            | S [y6] - 647.3471+ (rank 3)                  |
|              | 1003.0276++ (heavy)                                                                                                   | 537.7435++ (heavy)                                     | 638.3083++ (heavy)                           |
|              | P [y12] - 1332.7577+ (rank 1)                                                                                         | V [y7] - 756.3800+ (rank 2)                            | E [y8] - 942.4405+ (rank 2)                  |
|              | V [y9] - 1023.5525+ (rank 4)                                                                                          | N [y6] - 657.3116+ (rank 1)                            | C [y7] - 813.3979+ (rank 1)                  |
|              | V [y8] - 924.4841+ (rank 2)                                                                                           | E [y3] - 341.1911+ (rank 5)                            | S [y6] - 653.3672+ (rank 3)                  |
|              | R.GVQQVFEC <b>A</b> V <b>R</b> .T [157, 167]                                                                          |                                                        |                                              |
|              | 646.8244++                                                                                                            |                                                        |                                              |
|              | Q [y8] - 1008.4931+ (rank 3)                                                                                          |                                                        |                                              |
|              | F [y6] - 781.3661+ (rank 1)                                                                                           |                                                        |                                              |
|              | E [y5] - 634.2977+ (rank 2)                                                                                           |                                                        |                                              |
|              | 649.8345++ (heavy)                                                                                                    |                                                        |                                              |
|              | Q [y8] - 1014.5133+ (rank 3)                                                                                          |                                                        |                                              |
|              | F [y6] - 787.3863+ (rank 1)                                                                                           |                                                        |                                              |
|              | E [y5] - 640.3179+ (rank 2)                                                                                           |                                                        |                                              |
| <b>RAP1A</b> | <b>IPI:IP100019345.1 SWISS-PROT:P62834 RAP1A Ras-related protein Rap-1A</b>                                           |                                                        |                                              |
|              | R.V <b>K</b> DTEDVPMILVGN <b>K</b> .C [102, 116] (mis)                                                                | R.V <b>K</b> DTEDVPMILVGN <b>K</b> .C [102, 116] (mis) | K.DTEDVPMILVGN <b>K</b> .C [104, 116]        |
|              | 829.4451++                                                                                                            | 837.4426++                                             | 715.8634++                                   |
|              | D [y10] - 1085.6023+ (rank 4)                                                                                         | P [y8] - 887.5019+ (rank 1)                            | V [y9] - 970.5754+ (rank 4)                  |
|              | V [y9] - 970.5754+ (rank 3)                                                                                           | V [y4] - 417.2456+ (rank 3)                            | P [y8] - 871.5070+ (rank 1)                  |
|              | P [y8] - 871.5070+ (rank 1)                                                                                           | G [y3] - 318.1772+ (rank 2)                            | L [y5] - 530.3297+ (rank 2)                  |
|              | 837.4593++ (heavy)                                                                                                    | 845.4568++ (heavy)                                     | 719.8705++ (heavy)                           |

|                |                                                                                                                      |                                 |                               |
|----------------|----------------------------------------------------------------------------------------------------------------------|---------------------------------|-------------------------------|
|                | D [y10] - 1093.6165+ (rank 4)                                                                                        | P [y8] - 895.5161+ (rank 1)     | V [y9] - 978.5896+ (rank 4)   |
|                | V [y9] - 978.5896+ (rank 3)                                                                                          | V [y4] - 425.2598+ (rank 3)     | P [y8] - 879.5212+ (rank 1)   |
|                | P [y8] - 879.5212+ (rank 1)                                                                                          | G [y3] - 326.1914+ (rank 2)     | L [y5] - 538.3439+ (rank 2)   |
|                | R.QWCNCAFLESSAK.S [136, 148]                                                                                         |                                 |                               |
|                | 800.8478++                                                                                                           |                                 |                               |
|                | A [y8] - 852.4462+ (rank 3)                                                                                          |                                 |                               |
|                | F [y7] - 781.4090+ (rank 2)                                                                                          |                                 |                               |
|                | L [y6] - 634.3406+ (rank 1)                                                                                          |                                 |                               |
|                | 804.8549++ (heavy)                                                                                                   |                                 |                               |
|                | A [y8] - 860.4604+ (rank 3)                                                                                          |                                 |                               |
|                | F [y7] - 789.4232+ (rank 2)                                                                                          |                                 |                               |
|                | L [y6] - 642.3548+ (rank 1)                                                                                          |                                 |                               |
| <b>RAP2A</b>   | IPI: IPI00019346.1   SWISS-PROT: P10114   RAP2A Ras-related protein Rap-2a                                           |                                 |                               |
|                | K.VPVILVGNK.V [108, 116]                                                                                             | R.ALAEEWGCPFMETSAK.S [132, 147] | K.TMVDELFAEIVR.Q [150, 161]   |
|                | 469.8053++                                                                                                           | 913.9080++                      | 711.8685++                    |
|                | V [y7] - 742.4822+ (rank 1)                                                                                          | W [y11] - 1313.5653+ (rank 2)   | V [y10] - 1190.6416+ (rank 3) |
|                | I [y6] - 643.4137+ (rank 2)                                                                                          | G [y10] - 1127.4860+ (rank 1)   | F [y6] - 734.4196+ (rank 1)   |
|                | L [y5] - 530.3297+ (rank 3)                                                                                          | C [y9] - 1070.4645+ (rank 3)    | A [y5] - 587.3511+ (rank 2)   |
|                | 473.8124++ (heavy)                                                                                                   | 917.9151++ (heavy)              | 714.8786++ (heavy)            |
|                | V [y7] - 750.4963+ (rank 1)                                                                                          | W [y11] - 1321.5795+ (rank 2)   | V [y10] - 1196.6617+ (rank 3) |
|                | I [y6] - 651.4279+ (rank 2)                                                                                          | G [y10] - 1135.5002+ (rank 1)   | F [y6] - 740.4397+ (rank 1)   |
|                | L [y5] - 538.3439+ (rank 3)                                                                                          | C [y9] - 1078.4787+ (rank 3)    | A [y5] - 593.3713+ (rank 2)   |
| <b>RRAS</b>    | IPI: IPI00020418.1   SWISS-PROT: P10301   RRAS Ras-related protein R-Ras                                             |                                 |                               |
|                | K.ICSVDIGIPAR.L [68, 77]                                                                                             | R.QSFNEVGK.L [113, 120]         | K.LFTQILR.V [121, 127]        |
|                | 544.2819++                                                                                                           | 454.7272++                      | 445.7765++                    |
|                | S [y8] - 814.4417+ (rank 1)                                                                                          | F [y6] - 693.3566+ (rank 5)     | T [y5] - 630.3933+ (rank 1)   |
|                | V [y7] - 727.4097+ (rank 3)                                                                                          | N [y5] - 546.2882+ (rank 3)     | Q [y4] - 529.3457+ (rank 2)   |
|                | P [y3] - 343.2088+ (rank 2)                                                                                          | E [y4] - 432.2453+ (rank 6)     | I [y3] - 401.2871+ (rank 4)   |
|                | 547.2919++ (heavy)                                                                                                   | 458.7343++ (heavy)              | 448.7866++ (heavy)            |
|                | S [y8] - 820.4619+ (rank 1)                                                                                          | F [y6] - 701.3708+ (rank 5)     | T [y5] - 636.4135+ (rank 1)   |
|                | V [y7] - 733.4298+ (rank 3)                                                                                          | N [y5] - 554.3024+ (rank 3)     | Q [y4] - 535.3658+ (rank 2)   |
|                | P [y3] - 349.2290+ (rank 2)                                                                                          | E [y4] - 440.2595+ (rank 6)     | I [y3] - 407.3072+ (rank 4)   |
|                | K.ADLESQR.Q [143, 149]                                                                                               |                                 |                               |
|                | 409.7038++                                                                                                           |                                 |                               |
|                | L [y5] - 632.3362+ (rank 3)                                                                                          |                                 |                               |
|                | E [y4] - 519.2522+ (rank 1)                                                                                          |                                 |                               |
|                | S [y3] - 390.2096+ (rank 2)                                                                                          |                                 |                               |
|                | 412.7138++ (heavy)                                                                                                   |                                 |                               |
|                | L [y5] - 638.3563+ (rank 3)                                                                                          |                                 |                               |
|                | E [y4] - 525.2723+ (rank 1)                                                                                          |                                 |                               |
|                | S [y3] - 396.2297+ (rank 2)                                                                                          |                                 |                               |
| <b>RAB11B</b>  | IPI: IPI00020436.4   SWISS-PROT: Q15907   RAB11B Ras-related protein Rab-11B                                         |                                 |                               |
|                | K.AQIWDTAGQER.Y [61, 71]                                                                                             | R.GAVGALLVYDIAK.H [82, 94]      | K.NILTEIYR.I [166, 173]       |
|                | 637.8098++                                                                                                           | 645.3768++                      | 511.2875++                    |
|                | I [y9] - 1075.5167+ (rank 2)                                                                                         | L [y7] - 821.4767+ (rank 1)     | L [y6] - 794.4407+ (rank 1)   |
|                | W [y8] - 962.4326+ (rank 1)                                                                                          | V [y6] - 708.3927+ (rank 2)     | T [y5] - 681.3566+ (rank 2)   |
|                | D [y7] - 776.3533+ (rank 3)                                                                                          | Y [y5] - 609.3243+ (rank 3)     | E [y4] - 580.3089+ (rank 3)   |
|                | 640.8199++ (heavy)                                                                                                   | 649.3839++ (heavy)              | 514.2975++ (heavy)            |
|                | I [y9] - 1081.5368+ (rank 2)                                                                                         | L [y7] - 829.4909+ (rank 1)     | L [y6] - 800.4608+ (rank 1)   |
|                | W [y8] - 968.4528+ (rank 1)                                                                                          | V [y6] - 716.4069+ (rank 2)     | T [y5] - 687.3767+ (rank 2)   |
|                | D [y7] - 782.3735+ (rank 3)                                                                                          | Y [y5] - 617.3385+ (rank 3)     | E [y4] - 586.3291+ (rank 3)   |
| <b>NKIRAS2</b> | IPI: IPI00021124.3   SWISS-PROT: Q9NYR9-1   NKIRAS2 Isoform 1 of NF-kappa-B inhibitor-interacting Ras-like protein 2 |                                 |                               |
|                | K.VVVCQGASVGK.T [6, 16]                                                                                              | K.EVTIVVLGNK.C [111, 120]       | R.VDPDVAQHWAK.S [129, 139]    |
|                | 552.2975++                                                                                                           | 536.3241++                      | 633.3173++                    |
|                | V [y9] - 905.4509+ (rank 1)                                                                                          | V [y6] - 629.3981+ (rank 1)     | P [y9] - 1051.5320+ (rank 1)  |
|                | C [y8] - 806.3825+ (rank 2)                                                                                          | V [y5] - 530.3297+ (rank 2)     | D [y8] - 954.4792+ (rank 4)   |
|                | G [y7] - 646.3519+ (rank 3)                                                                                          | L [y4] - 431.2613+ (rank 3)     | A [y6] - 740.3838+ (rank 3)   |
|                | 556.3046++ (heavy)                                                                                                   | 540.3312++ (heavy)              | 637.3244++ (heavy)            |
|                | V [y9] - 913.4651+ (rank 1)                                                                                          | V [y6] - 637.4123+ (rank 1)     | P [y9] - 1059.5462+ (rank 1)  |
|                | C [y8] - 814.3967+ (rank 2)                                                                                          | V [y5] - 538.3439+ (rank 2)     | D [y8] - 962.4934+ (rank 4)   |
|                | G [y7] - 654.3661+ (rank 3)                                                                                          | L [y4] - 439.2755+ (rank 3)     | A [y6] - 748.3980+ (rank 3)   |
|                | R.SLLEPFVYLASK.M [155, 166]                                                                                          |                                 |                               |
|                | 683.8845++                                                                                                           |                                 |                               |
|                | L [y10] - 1166.6456+ (rank 3)                                                                                        |                                 |                               |
|                | E [y9] - 1053.5615+ (rank 2)                                                                                         |                                 |                               |
|                | P [y8] - 924.5189+ (rank 1)                                                                                          |                                 |                               |
|                | 687.8916++ (heavy)                                                                                                   |                                 |                               |
|                | L [y10] - 1174.6598+ (rank 3)                                                                                        |                                 |                               |
|                | E [y9] - 1061.5757+ (rank 2)                                                                                         |                                 |                               |
|                | P [y8] - 932.5331+ (rank 1)                                                                                          |                                 |                               |
| <b>RAB33B</b>  | IPI: IPI00021475.1   SWISS-PROT: Q9H082   RAB33B Ras-related protein Rab-33B                                         |                                 |                               |
|                | K.IIVIGDSNVGK.T [35, 45]                                                                                             | R.AVEIDGER.I [73, 80]           | R.SAIQVPTDLAQK.F [153, 164]   |
|                | 557.8270++                                                                                                           | 444.7247++                      | 635.8537++                    |
|                | V [y9] - 888.4785+ (rank 1)                                                                                          | E [y6] - 718.3366+ (rank 1)     | Q [y9] - 999.5469+ (rank 3)   |
|                | I [y8] - 789.4101+ (rank 3)                                                                                          | I [y5] - 589.2940+ (rank 3)     | V [y8] - 871.4884+ (rank 2)   |
|                | G [y7] - 676.3260+ (rank 2)                                                                                          | D [y4] - 476.2100+ (rank 4)     | P [y7] - 772.4199+ (rank 1)   |
|                | 561.8341++ (heavy)                                                                                                   | 447.7348++ (heavy)              | 639.8608++ (heavy)            |

|              |                                                                                            |                                |                               |
|--------------|--------------------------------------------------------------------------------------------|--------------------------------|-------------------------------|
|              | V [y9] - 896.4927+ (rank 1)                                                                | E [y6] - 724.3567+ (rank 1)    | Q [y9] - 1007.5611+ (rank 3)  |
|              | I [y8] - 797.4243+ (rank 3)                                                                | I [y5] - 595.3141+ (rank 3)    | V [y8] - 879.5026+ (rank 2)   |
|              | G [y7] - 684.3402+ (rank 2)                                                                | D [y4] - 482.2301+ (rank 4)    | P [y7] - 780.4341+ (rank 1)   |
| <b>ARL6</b>  | <b>IPI:IP100021685.1 SWISS-PROT:Q9H0F7 ARL6 ADP-ribosylation factor-like protein 6</b>     |                                |                               |
|              | R.NLWEHYK.E [77, 84]                                                                       | K.EELDTLLNHPDIK.H [106, 118]   | R.IPILFFANK.M [122, 130]      |
|              | 576.7773++                                                                                 | 768.8988++                     | 531.8210++                    |
|              | W [y6] - 925.4203+ (rank 1)                                                                | L [y7] - 836.4625+ (rank 1)    | I [y7] - 852.4978+ (rank 2)   |
|              | E [y5] - 739.3410+ (rank 2)                                                                | N [y6] - 723.3784+ (rank 4)    | L [y6] - 739.4137+ (rank 1)   |
|              | H [y4] - 610.2984+ (rank 3)                                                                | P [y4] - 472.2766+ (rank 2)    | F [y5] - 626.3297+ (rank 3)   |
|              | 580.7844++ (heavy)                                                                         | 772.9059++ (heavy)             | 535.8281++ (heavy)            |
|              | W [y6] - 933.4345+ (rank 1)                                                                | L [y7] - 844.4767+ (rank 1)    | I [y7] - 860.5120+ (rank 2)   |
|              | E [y5] - 747.3552+ (rank 2)                                                                | N [y6] - 731.3926+ (rank 4)    | L [y6] - 747.4279+ (rank 1)   |
|              | H [y4] - 618.3126+ (rank 3)                                                                | P [y4] - 480.2908+ (rank 2)    | F [y5] - 634.3439+ (rank 3)   |
|              | K.VSQLLLENIK.D [142, 152]                                                                  |                                |                               |
|              | 658.8658++                                                                                 |                                |                               |
|              | L [y7] - 889.4812+ (rank 2)                                                                |                                |                               |
|              | C [y6] - 776.3971+ (rank 1)                                                                |                                |                               |
|              | E [y4] - 503.2824+ (rank 3)                                                                |                                |                               |
|              | 662.8729++ (heavy)                                                                         |                                |                               |
|              | L [y7] - 897.4954+ (rank 2)                                                                |                                |                               |
|              | C [y6] - 784.4113+ (rank 1)                                                                |                                |                               |
|              | E [y4] - 511.2966+ (rank 3)                                                                |                                |                               |
| <b>RAC3</b>  | <b>IPI:IP100023138.1 SWISS-PROT:P60763 RAC3 Ras-related C3 botulinum toxin substrate 3</b> |                                |                               |
|              | K.LAPITYPQGLAMAR.E [133, 146]                                                              | K.LAPITYPQGLAMAR.E [133, 146]  | R.AVLCPPPVK.K [174, 182]      |
|              | 751.4134++                                                                                 | 759.4109++                     | 490.7835++                    |
|              | T [y10] - 1107.5615+ (rank 2)                                                              | T [y10] - 1123.5565+ (rank 2)  | L [y7] - 810.4542+ (rank 3)   |
|              | Y [y9] - 1006.5139+ (rank 3)                                                               | Y [y9] - 1022.5088+ (rank 3)   | C [y6] - 697.3702+ (rank 2)   |
|              | P [y8] - 843.4505+ (rank 1)                                                                | P [y8] - 859.4454+ (rank 1)    | P [y5] - 537.3395+ (rank 1)   |
|              | 754.4235++ (heavy)                                                                         | 762.4209++ (heavy)             | 494.7906++ (heavy)            |
|              | T [y10] - 1113.5817+ (rank 2)                                                              | T [y10] - 1129.5766+ (rank 2)  | L [y7] - 818.4684+ (rank 3)   |
|              | Y [y9] - 1012.5340+ (rank 3)                                                               | Y [y9] - 1028.5289+ (rank 3)   | C [y6] - 705.3844+ (rank 2)   |
|              | P [y8] - 849.4707+ (rank 1)                                                                | P [y8] - 865.4656+ (rank 1)    | P [y5] - 545.3537+ (rank 1)   |
| <b>RAB3A</b> | <b>IPI:IP100023504.1 SWISS-PROT:P20336 RAB3A Ras-related protein Rab-3A</b>                |                                |                               |
|              | K.ESSDQNFDFYMFK.I [12, 23]                                                                 | K.TYSWDNAQVLLVGNK.C [121, 135] | R.LVDVICEK.M [178, 185]       |
|              | 755.8114++                                                                                 | 854.4387++                     | 488.2626++                    |
|              | N [y7] - 964.4233+ (rank 1)                                                                | D [y11] - 1170.6477+ (rank 2)  | D [y6] - 763.3655+ (rank 1)   |
|              | D [y5] - 703.3120+ (rank 2)                                                                | L [y6] - 643.4137+ (rank 3)    | I [y4] - 549.2701+ (rank 3)   |
|              | Y [y4] - 588.2850+ (rank 3)                                                                | L [y5] - 530.3297+ (rank 1)    | C [y3] - 436.1860+ (rank 2)   |
|              | 759.8185++ (heavy)                                                                         | 858.4458++ (heavy)             | 492.2697++ (heavy)            |
|              | N [y7] - 972.4375+ (rank 1)                                                                | D [y11] - 1178.6619+ (rank 2)  | D [y6] - 771.3797+ (rank 1)   |
|              | D [y5] - 711.3262+ (rank 2)                                                                | L [y6] - 651.4279+ (rank 3)    | I [y4] - 557.2843+ (rank 3)   |
|              | Y [y4] - 596.2992+ (rank 3)                                                                | L [y5] - 538.3439+ (rank 1)    | C [y3] - 444.2002+ (rank 2)   |
|              | K.MSESLDTADPAVTGAK.Q [186, 201]                                                            |                                |                               |
|              | 796.8773++                                                                                 |                                |                               |
|              | D [y11] - 1045.5160+ (rank 2)                                                              |                                |                               |
|              | D [y8] - 758.4043+ (rank 1)                                                                |                                |                               |
|              | P [y7] - 643.3774+ (rank 3)                                                                |                                |                               |
|              | 800.8844++ (heavy)                                                                         |                                |                               |
|              | D [y11] - 1053.5302+ (rank 2)                                                              |                                |                               |
|              | D [y8] - 766.4185+ (rank 1)                                                                |                                |                               |
|              | P [y7] - 651.3916+ (rank 3)                                                                |                                |                               |
| <b>RAB5A</b> | <b>IPI:IP100023510.1 SWISS-PROT:P20339 RAB5A Ras-related protein Rab-5A</b>                |                                |                               |
|              | R.QASPNIVIALSGNK.A [120, 133]                                                              | K.NEPQNPGANSAR.G [183, 194]    | R.GVDLTEPTQPTR.N [197, 208]   |
|              | 706.3988++                                                                                 | 627.7947++                     | 657.3384++                    |
|              | P [y11] - 1125.6626+ (rank 3)                                                              | P [y10] - 1011.4966+ (rank 2)  | E [y7] - 828.4210+ (rank 2)   |
|              | V [y8] - 801.4829+ (rank 1)                                                                | Q [y9] - 914.4439+ (rank 3)    | P [y6] - 699.3784+ (rank 1)   |
|              | A [y6] - 589.3304+ (rank 2)                                                                | P [y7] - 672.3424+ (rank 1)    | P [y3] - 373.2194+ (rank 3)   |
|              | 710.4059++ (heavy)                                                                         | 630.8048++ (heavy)             | 660.3485++ (heavy)            |
|              | P [y11] - 1133.6768+ (rank 3)                                                              | P [y10] - 1017.5168+ (rank 2)  | E [y7] - 834.4411+ (rank 2)   |
|              | V [y8] - 809.4971+ (rank 1)                                                                | Q [y9] - 920.4640+ (rank 3)    | P [y6] - 705.3985+ (rank 1)   |
|              | A [y6] - 597.3446+ (rank 2)                                                                | P [y7] - 678.3625+ (rank 1)    | P [y3] - 379.2395+ (rank 3)   |
| <b>RAB6C</b> | <b>IPI:IP100023526.4 SWISS-PROT:P20340-1 RAB6A Isoform 1 of Ras-related protein Rab-6A</b> |                                |                               |
|              | R.QVSIEEGER.K [134, 142]                                                                   | K.ELNVMFIETSAK.A [146, 157]    | R.VAAALPGMESTQDR.S [169, 182] |
|              | 523.7593++                                                                                 | 691.3552++                     | 723.3563++                    |
|              | S [y7] - 819.3843+ (rank 2)                                                                | M [y8] - 926.4652+ (rank 1)    | L [y10] - 1133.5255+ (rank 2) |
|              | E [y5] - 619.2682+ (rank 1)                                                                | F [y7] - 795.4247+ (rank 2)    | P [y9] - 1020.4415+ (rank 1)  |
|              | E [y4] - 490.2256+ (rank 3)                                                                | I [y6] - 648.3563+ (rank 3)    | G [y8] - 923.3887+ (rank 3)   |
|              | 526.7693++ (heavy)                                                                         | 695.3623++ (heavy)             | 726.3664++ (heavy)            |
|              | S [y7] - 825.4044+ (rank 2)                                                                | M [y8] - 934.4794+ (rank 1)    | L [y10] - 1139.5457+ (rank 2) |
|              | E [y5] - 625.2883+ (rank 1)                                                                | F [y7] - 803.4389+ (rank 2)    | P [y9] - 1026.4616+ (rank 1)  |
|              | E [y4] - 496.2457+ (rank 3)                                                                | I [y6] - 656.3705+ (rank 3)    | G [y8] - 929.4088+ (rank 3)   |
| <b>MRAS</b>  | <b>IPI:IP100024166.3 SWISS-PROT:O14807 MRAS Ras-related protein M-Ras</b>                  |                                |                               |
|              | K.IFVDPDYDPTIEDSYLK.H [36, 51]                                                             |                                |                               |
|              | 957.9722++                                                                                 |                                |                               |
|              | D [y10] - 1180.5732+ (rank 2)                                                              |                                |                               |
|              | P [y9] - 1065.5463+ (rank 1)                                                               |                                |                               |
|              | E [y6] - 754.3618+ (rank 3)                                                                |                                |                               |

|               |                                                                                                           |  |  |                                       |  |  |  |                                  |  |  |  |
|---------------|-----------------------------------------------------------------------------------------------------------|--|--|---------------------------------------|--|--|--|----------------------------------|--|--|--|
|               | 961.9793++ (heavy)                                                                                        |  |  |                                       |  |  |  |                                  |  |  |  |
|               | D [y10] - 1188.5874+ (rank 2)                                                                             |  |  |                                       |  |  |  |                                  |  |  |  |
|               | P [y9] - 1073.5605+ (rank 1)                                                                              |  |  |                                       |  |  |  |                                  |  |  |  |
|               | E [y6] - 762.3760+ (rank 3)                                                                               |  |  |                                       |  |  |  |                                  |  |  |  |
| <b>RAB8B</b>  | <b>IPI: IPI00024282.1   SWISS-PROT: Q92930   RAB8B Ras-related protein Rab-8B</b>                         |  |  |                                       |  |  |  |                                  |  |  |  |
|               | R.NIEEHASSDVER.M [104, 115]                                                                               |  |  | K.SSANVEEAFFTLAR.D [153, 166]         |  |  |  | K.MNDSNSAGAGGPVK.I [176, 189]    |  |  |  |
|               | 693.3182++                                                                                                |  |  | 771.3834++                            |  |  |  | 652.7986++                       |  |  |  |
|               | E [y10] - 1158.5022+ (rank 3)                                                                             |  |  | E [y9] - 1083.5469+ (rank 1)          |  |  |  | S [y9] - 743.4046+ (rank 2)      |  |  |  |
|               | H [y8] - 900.4170+ (rank 2)                                                                               |  |  | E [y8] - 954.5043+ (rank 3)           |  |  |  | A [y8] - 656.3726+ (rank 3)      |  |  |  |
|               | A [y7] - 763.3581+ (rank 1)                                                                               |  |  | F [y6] - 754.4246+ (rank 2)           |  |  |  | G [y7] - 585.3355+ (rank 1)      |  |  |  |
|               | 696.3283++ (heavy)                                                                                        |  |  | 774.3934++ (heavy)                    |  |  |  | 656.8057++ (heavy)               |  |  |  |
|               | E [y10] - 1164.5223+ (rank 3)                                                                             |  |  | E [y9] - 1089.5671+ (rank 1)          |  |  |  | S [y9] - 751.4188+ (rank 2)      |  |  |  |
|               | H [y8] - 906.4371+ (rank 2)                                                                               |  |  | E [y8] - 960.5245+ (rank 3)           |  |  |  | A [y8] - 664.3868+ (rank 3)      |  |  |  |
|               | A [y7] - 769.3782+ (rank 1)                                                                               |  |  | F [y6] - 760.4448+ (rank 2)           |  |  |  | G [y7] - 593.3497+ (rank 1)      |  |  |  |
|               | K.MNDSNSAGAGGPVK.I [176, 189]                                                                             |  |  |                                       |  |  |  |                                  |  |  |  |
|               | 660.7961++                                                                                                |  |  |                                       |  |  |  |                                  |  |  |  |
|               | S [y11] - 944.4796+ (rank 2)                                                                              |  |  |                                       |  |  |  |                                  |  |  |  |
|               | S [y9] - 743.4046+ (rank 3)                                                                               |  |  |                                       |  |  |  |                                  |  |  |  |
|               | G [y7] - 585.3355+ (rank 1)                                                                               |  |  |                                       |  |  |  |                                  |  |  |  |
|               | 664.8032++ (heavy)                                                                                        |  |  |                                       |  |  |  |                                  |  |  |  |
|               | S [y11] - 952.4938+ (rank 2)                                                                              |  |  |                                       |  |  |  |                                  |  |  |  |
|               | S [y9] - 751.4188+ (rank 3)                                                                               |  |  |                                       |  |  |  |                                  |  |  |  |
|               | G [y7] - 593.3497+ (rank 1)                                                                               |  |  |                                       |  |  |  |                                  |  |  |  |
| <b>RAB7L1</b> | <b>IPI: IPI00024775.1   SWISS-PROT: O14966   RAB7L1 Ras-related protein Rab-7L1</b>                       |  |  |                                       |  |  |  |                                  |  |  |  |
|               | K.VLQWSDYEIVR.L [47, 57]                                                                                  |  |  | K.CDLSPWAVSR.D [126, 135]             |  |  |  | K.ENGFTGWTETSVK.E [144, 156]     |  |  |  |
|               | 704.3670++                                                                                                |  |  | 595.7848++                            |  |  |  | 728.3412++                       |  |  |  |
|               | W [y8] - 1067.5156+ (rank 1)                                                                              |  |  | L [y8] - 915.5047+ (rank 3)           |  |  |  | T [y9] - 1008.4997+ (rank 1)     |  |  |  |
|               | S [y7] - 881.4363+ (rank 2)                                                                               |  |  | S [y7] - 802.4206+ (rank 2)           |  |  |  | G [y8] - 907.4520+ (rank 2)      |  |  |  |
|               | Y [y5] - 679.3774+ (rank 3)                                                                               |  |  | P [y6] - 715.3886+ (rank 1)           |  |  |  | T [y6] - 664.3512+ (rank 3)      |  |  |  |
|               | 707.3770++ (heavy)                                                                                        |  |  | 598.7948++ (heavy)                    |  |  |  | 732.3483++ (heavy)               |  |  |  |
|               | W [y8] - 1073.5358+ (rank 1)                                                                              |  |  | L [y8] - 921.5248+ (rank 3)           |  |  |  | T [y9] - 1016.5139+ (rank 1)     |  |  |  |
|               | S [y7] - 887.4565+ (rank 2)                                                                               |  |  | S [y7] - 808.4407+ (rank 2)           |  |  |  | G [y8] - 915.4662+ (rank 2)      |  |  |  |
|               | Y [y5] - 685.3975+ (rank 3)                                                                               |  |  | P [y6] - 721.4087+ (rank 1)           |  |  |  | T [y6] - 672.3654+ (rank 3)      |  |  |  |
| <b>RHOC</b>   | <b>IPI: IPI00027434.1   SWISS-PROT: P08134   RHOC Rho-related GTP-binding protein RhoC</b>                |  |  |                                       |  |  |  |                                  |  |  |  |
|               | K.HFCPNVPIILVGNK.K [104, 117]                                                                             |  |  | K.HFCPNVPIILVGNKK.D [104, 118] (miss) |  |  |  | R.ISAFGYLECSAK.T [150, 161]      |  |  |  |
|               | 804.4400++                                                                                                |  |  | 868.4874++                            |  |  |  | 673.3265++                       |  |  |  |
|               | P [y11] - 1163.7147+ (rank 1)                                                                             |  |  | P [y9] - 981.6455+ (rank 3)           |  |  |  | F [y9] - 1074.4925+ (rank 2)     |  |  |  |
|               | P [y8] - 853.5506+ (rank 3)                                                                               |  |  | L [y6] - 658.4246+ (rank 5)           |  |  |  | G [y8] - 927.4240+ (rank 1)      |  |  |  |
|               | I [y7] - 756.4978+ (rank 4)                                                                               |  |  | G [y4] - 446.2722+ (rank 4)           |  |  |  | L [y6] - 707.3393+ (rank 3)      |  |  |  |
|               | 808.4471++ (heavy)                                                                                        |  |  | 876.5016++ (heavy)                    |  |  |  | 677.3336++ (heavy)               |  |  |  |
|               | P [y11] - 1171.7289+ (rank 1)                                                                             |  |  | P [y9] - 997.6739+ (rank 3)           |  |  |  | F [y9] - 1082.5067+ (rank 2)     |  |  |  |
|               | P [y8] - 861.5648+ (rank 3)                                                                               |  |  | L [y6] - 674.4530+ (rank 5)           |  |  |  | G [y8] - 935.4382+ (rank 1)      |  |  |  |
|               | I [y7] - 764.5120+ (rank 4)                                                                               |  |  | G [y4] - 462.3006+ (rank 4)           |  |  |  | L [y6] - 715.3535+ (rank 3)      |  |  |  |
|               | 536.6291+++                                                                                               |  |  | 579.3274+++                           |  |  |  |                                  |  |  |  |
|               | P [y8] - 853.5506+ (rank 1)                                                                               |  |  | P [y9] - 981.6455+ (rank 1)           |  |  |  |                                  |  |  |  |
|               | I [y7] - 756.4978+ (rank 2)                                                                               |  |  | I [y7] - 771.5087+ (rank 3)           |  |  |  |                                  |  |  |  |
|               | L [y5] - 530.3297+ (rank 3)                                                                               |  |  | L [y6] - 658.4246+ (rank 2)           |  |  |  |                                  |  |  |  |
|               | 539.3005+++ (heavy)                                                                                       |  |  | 584.6702+++ (heavy)                   |  |  |  |                                  |  |  |  |
|               | P [y8] - 861.5648+ (rank 1)                                                                               |  |  | P [y9] - 997.6739+ (rank 1)           |  |  |  |                                  |  |  |  |
|               | I [y7] - 764.5120+ (rank 2)                                                                               |  |  | I [y7] - 787.5371+ (rank 3)           |  |  |  |                                  |  |  |  |
|               | L [y5] - 538.3439+ (rank 3)                                                                               |  |  | L [y6] - 674.4530+ (rank 2)           |  |  |  |                                  |  |  |  |
| <b>RHOJ</b>   | <b>IPI: IPI00027952.1   SWISS-PROT: Q9H4E5-1   RHOJ Isoform 1 of Rho-related GTP-binding protein RhoJ</b> |  |  |                                       |  |  |  |                                  |  |  |  |
|               | K.AIGAQCYLECSALTQK.G [165, 180]                                                                           |  |  | K.AVFDEAILTIFHPK.K [184, 197]         |  |  |  |                                  |  |  |  |
|               | 906.9346++                                                                                                |  |  | 800.9403++                            |  |  |  |                                  |  |  |  |
|               | L [y9] - 1049.5296+ (rank 4)                                                                              |  |  | L [y7] - 855.5087+ (rank 1)           |  |  |  |                                  |  |  |  |
|               | E [y8] - 936.4455+ (rank 1)                                                                               |  |  | T [y6] - 742.4246+ (rank 2)           |  |  |  |                                  |  |  |  |
|               | C [y7] - 807.4029+ (rank 2)                                                                               |  |  | I [y5] - 641.3770+ (rank 3)           |  |  |  |                                  |  |  |  |
|               | 910.9417++ (heavy)                                                                                        |  |  | 804.9474++ (heavy)                    |  |  |  |                                  |  |  |  |
|               | L [y9] - 1057.5438+ (rank 4)                                                                              |  |  | L [y7] - 863.5229+ (rank 1)           |  |  |  |                                  |  |  |  |
|               | E [y8] - 944.4597+ (rank 1)                                                                               |  |  | T [y6] - 750.4388+ (rank 2)           |  |  |  |                                  |  |  |  |
|               | C [y7] - 815.4171+ (rank 2)                                                                               |  |  | I [y5] - 649.3912+ (rank 3)           |  |  |  |                                  |  |  |  |
| <b>RAB38</b>  | <b>IPI: IPI00027981.10   SWISS-PROT: P57729   RAB38 Rab-related GTP-binding protein</b>                   |  |  |                                       |  |  |  |                                  |  |  |  |
|               | K.LLVIGDLGVGK.T [11, 21]                                                                                  |  |  | K.VLHWDPETVVR.L [49, 59]              |  |  |  | K.LSLPNGKPVSVVLLANK.C [111, 127] |  |  |  |
|               | 542.3422++                                                                                                |  |  | 675.8619++                            |  |  |  | 583.6926+++                      |  |  |  |
|               | V [y9] - 857.5091+ (rank 1)                                                                               |  |  | H [y9] - 1138.5640+ (rank 2)          |  |  |  | V [y6] - 657.4294+ (rank 3)      |  |  |  |
|               | I [y8] - 758.4407+ (rank 3)                                                                               |  |  | W [y8] - 1001.5051+ (rank 3)          |  |  |  | L [y5] - 558.3610+ (rank 1)      |  |  |  |
|               | G [y7] - 645.3566+ (rank 2)                                                                               |  |  | P [y6] - 700.3988+ (rank 1)           |  |  |  | L [y4] - 445.2769+ (rank 2)      |  |  |  |
|               | 546.3493++ (heavy)                                                                                        |  |  | 678.8719++ (heavy)                    |  |  |  | 589.0354+++ (heavy)              |  |  |  |
|               | V [y9] - 865.5233+ (rank 1)                                                                               |  |  | H [y9] - 1144.5841+ (rank 2)          |  |  |  | V [y6] - 665.4436+ (rank 3)      |  |  |  |
|               | I [y8] - 766.4549+ (rank 3)                                                                               |  |  | W [y8] - 1007.5252+ (rank 3)          |  |  |  | L [y5] - 566.3752+ (rank 1)      |  |  |  |
|               | G [y7] - 653.3708+ (rank 2)                                                                               |  |  | P [y6] - 706.4189+ (rank 1)           |  |  |  | L [y4] - 453.2911+ (rank 2)      |  |  |  |
|               | K.ENINIDEASR.C [161, 170]                                                                                 |  |  |                                       |  |  |  |                                  |  |  |  |
|               | 580.7807++                                                                                                |  |  |                                       |  |  |  |                                  |  |  |  |
|               | N [y7] - 804.3846+ (rank 2)                                                                               |  |  |                                       |  |  |  |                                  |  |  |  |
|               | I [y6] - 690.3417+ (rank 3)                                                                               |  |  |                                       |  |  |  |                                  |  |  |  |
|               | D [y5] - 577.2576+ (rank 1)                                                                               |  |  |                                       |  |  |  |                                  |  |  |  |
|               | 583.7908++ (heavy)                                                                                        |  |  |                                       |  |  |  |                                  |  |  |  |

|              |                                                                                          |  |  |                                     |  |  |  |                                   |  |
|--------------|------------------------------------------------------------------------------------------|--|--|-------------------------------------|--|--|--|-----------------------------------|--|
|              | N [y7] - 810.4048+ (rank 2)                                                              |  |  |                                     |  |  |  |                                   |  |
|              | I [y6] - 696.3618+ (rank 3)                                                              |  |  |                                     |  |  |  |                                   |  |
|              | D [y5] - 583.2778+ (rank 1)                                                              |  |  |                                     |  |  |  |                                   |  |
| <b>RAB25</b> | <b>IPI:IP100027993.2 SWISS-PROT:P57735 RAB25 Ras-related protein Rab-25</b>              |  |  |                                     |  |  |  |                                   |  |
|              | K.VVLIGESGVGK.T [14, 24]                                                                 |  |  | R.TTIGVEFSTR.T [42, 51]             |  |  |  | K.AQIWDTAGLER.Y [62, 72]          |  |
|              | 529.3162++                                                                               |  |  | 555.7931++                          |  |  |  | 630.3226++                        |  |
|              | L [y9] - 859.4884+ (rank 2)                                                              |  |  | I [y8] - 908.4836+ (rank 3)         |  |  |  | I [y9] - 1060.5422+ (rank 2)      |  |
|              | I [y8] - 746.4043+ (rank 3)                                                              |  |  | G [y7] - 795.3995+ (rank 1)         |  |  |  | W [y8] - 947.4581+ (rank 1)       |  |
|              | G [y7] - 633.3202+ (rank 1)                                                              |  |  | E [y5] - 639.3097+ (rank 2)         |  |  |  | D [y7] - 761.3788+ (rank 3)       |  |
|              | 533.3233++ (heavy)                                                                       |  |  | 558.8032++ (heavy)                  |  |  |  | 633.3326++ (heavy)                |  |
|              | L [y9] - 867.5026+ (rank 2)                                                              |  |  | I [y8] - 914.5037+ (rank 3)         |  |  |  | I [y9] - 1066.5623+ (rank 2)      |  |
|              | I [y8] - 754.4185+ (rank 3)                                                              |  |  | G [y7] - 801.4197+ (rank 1)         |  |  |  | W [y8] - 953.4782+ (rank 1)       |  |
|              | G [y7] - 641.3344+ (rank 1)                                                              |  |  | E [y5] - 645.3298+ (rank 2)         |  |  |  | D [y7] - 767.3989+ (rank 3)       |  |
|              | R.EVPTEEAR.M [133, 140]                                                                  |  |  |                                     |  |  |  |                                   |  |
|              | 465.7300++                                                                               |  |  |                                     |  |  |  |                                   |  |
|              | P [y6] - 702.3417+ (rank 1)                                                              |  |  |                                     |  |  |  |                                   |  |
|              | T [y5] - 605.2889+ (rank 2)                                                              |  |  |                                     |  |  |  |                                   |  |
|              | E [y4] - 504.2413+ (rank 3)                                                              |  |  |                                     |  |  |  |                                   |  |
|              | 468.7401++ (heavy)                                                                       |  |  |                                     |  |  |  |                                   |  |
|              | P [y6] - 708.3618+ (rank 1)                                                              |  |  |                                     |  |  |  |                                   |  |
|              | T [y5] - 611.3091+ (rank 2)                                                              |  |  |                                     |  |  |  |                                   |  |
|              | E [y4] - 510.2614+ (rank 3)                                                              |  |  |                                     |  |  |  |                                   |  |
| <b>RAB8A</b> | <b>IPI:IP100028481.1 SWISS-PROT:P61006 RAB8A Ras-related protein Rab-8A</b>              |  |  |                                     |  |  |  |                                   |  |
|              | R.NIEEHASADVEK.M [104, 115]                                                              |  |  | K.LALDYGIK.F [138, 145]             |  |  |  | K.LEGNPQGSNQGVI [176, 189]        |  |
|              | 671.3177++                                                                               |  |  | 446.7606++                          |  |  |  | 707.8497++                        |  |
|              | E [y10] - 1114.5011+ (rank 2)                                                            |  |  | A [y7] - 779.4298+ (rank 3)         |  |  |  | S [y10] - 1001.5010+ (rank 3)     |  |
|              | E [y9] - 985.4585+ (rank 3)                                                              |  |  | L [y6] - 708.3927+ (rank 1)         |  |  |  | P [y9] - 914.4690+ (rank 1)       |  |
|              | H [y8] - 856.4159+ (rank 1)                                                              |  |  | D [y5] - 595.3086+ (rank 2)         |  |  |  | G [y7] - 689.3577+ (rank 2)       |  |
|              | 675.3248++ (heavy)                                                                       |  |  | 450.7677++ (heavy)                  |  |  |  | 711.8568++ (heavy)                |  |
|              | E [y10] - 1122.5153+ (rank 2)                                                            |  |  | A [y7] - 787.4440+ (rank 3)         |  |  |  | S [y10] - 1009.5152+ (rank 3)     |  |
|              | E [y9] - 993.4727+ (rank 3)                                                              |  |  | L [y6] - 716.4069+ (rank 1)         |  |  |  | P [y9] - 922.4832+ (rank 1)       |  |
|              | H [y8] - 864.4301+ (rank 1)                                                              |  |  | D [y5] - 603.3228+ (rank 2)         |  |  |  | G [y7] - 697.3719+ (rank 2)       |  |
| <b>ARL4A</b> | <b>IPI:IP100029596.1 SWISS-PROT:P40617 ARL4A ADP-ribosylation factor-like protein 4A</b> |  |  |                                     |  |  |  |                                   |  |
|              | K.TVTFHFWDVGGQEK.L [67, 80]                                                              |  |  | R.ISENQGVPLIVANK.Q [120, 134]       |  |  |  | R.NLSLSLSEIEK.L [139, 148]        |  |
|              | 550.9352+++                                                                              |  |  | 790.9540++                          |  |  |  | 560.2982++                        |  |
|              | F [y9] - 1065.5000+ (rank 3)                                                             |  |  | P [y8] - 853.5506+ (rank 1)         |  |  |  | L [y8] - 918.5142+ (rank 3)       |  |
|              | W [y8] - 918.4316+ (rank 2)                                                              |  |  | V [y4] - 431.2613+ (rank 2)         |  |  |  | S [y7] - 805.4302+ (rank 1)       |  |
|              | G [y5] - 518.2569+ (rank 1)                                                              |  |  | A [y3] - 332.1928+ (rank 3)         |  |  |  | S [y5] - 605.3141+ (rank 2)       |  |
|              | 553.6066+++ (heavy)                                                                      |  |  | 794.9611++ (heavy)                  |  |  |  | 564.3053++ (heavy)                |  |
|              | F [y9] - 1073.5142+ (rank 3)                                                             |  |  | P [y8] - 861.5648+ (rank 1)         |  |  |  | L [y8] - 926.5284+ (rank 3)       |  |
|              | W [y8] - 926.4458+ (rank 2)                                                              |  |  | V [y4] - 439.2755+ (rank 2)         |  |  |  | S [y7] - 813.4444+ (rank 1)       |  |
|              | G [y5] - 526.2711+ (rank 1)                                                              |  |  | A [y3] - 340.2070+ (rank 3)         |  |  |  | S [y5] - 613.3283+ (rank 2)       |  |
| <b>RAB6A</b> | <b>IPI:IP100030304.2 SWISS-PROT:Q9H0N0 RAB6C;LOC150786 Ras-related protein Rab-6C</b>    |  |  |                                     |  |  |  |                                   |  |
|              | R.DSAAAVVYDITNVNSFQQTTK.W [84]                                                           |  |  | K.WIDDVTER.G [106, 114] (missed 1)  |  |  |  | R.TDLADKR.Q [127, 133] (missed 1) |  |
|              | 791.0640+++                                                                              |  |  | 595.3016++                          |  |  |  | 409.7220++                        |  |
|              | N [y8] - 953.4687+ (rank 1)                                                              |  |  | D [y7] - 890.4326+ (rank 4)         |  |  |  | D [y6] - 717.3890+ (rank 5)       |  |
|              | S [y7] - 839.4258+ (rank 3)                                                              |  |  | D [y6] - 775.4057+ (rank 3)         |  |  |  | L [y5] - 602.3620+ (rank 3)       |  |
|              | Q [y4] - 477.2667+ (rank 2)                                                              |  |  | V [y5] - 660.3787+ (rank 1)         |  |  |  | A [y4] - 489.2780+ (rank 2)       |  |
|              | 793.7354+++ (heavy)                                                                      |  |  | 601.3218++ (heavy)                  |  |  |  | 416.7391++ (heavy)                |  |
|              | N [y8] - 961.4829+ (rank 1)                                                              |  |  | D [y7] - 902.4729+ (rank 4)         |  |  |  | D [y6] - 731.4233+ (rank 5)       |  |
|              | S [y7] - 847.4400+ (rank 3)                                                              |  |  | D [y6] - 787.4459+ (rank 3)         |  |  |  | L [y5] - 616.3964+ (rank 3)       |  |
|              | Q [y4] - 485.2809+ (rank 2)                                                              |  |  | V [y5] - 672.4190+ (rank 1)         |  |  |  | A [y4] - 503.3123+ (rank 2)       |  |
| <b>RAB2A</b> | <b>IPI:IP100031169.1 SWISS-PROT:P61019 RAB2A Ras-related protein Rab-2A</b>              |  |  |                                     |  |  |  |                                   |  |
|              | R.MITIDGK.Q [46, 52]                                                                     |  |  | K.KEEGEAFAR.E [130, 138] (missed 1) |  |  |  | K.TASNVEEAFINTAK.E [151, 164]     |  |
|              | 389.2124++                                                                               |  |  | 518.7565++                          |  |  |  | 747.8754++                        |  |
|              | I [y6] - 646.3770+ (rank 4)                                                              |  |  | E [y8] - 908.4108+ (rank 1)         |  |  |  | E [y9] - 1022.5153+ (rank 1)      |  |
|              | T [y5] - 533.2930+ (rank 1)                                                              |  |  | E [y7] - 779.3682+ (rank 2)         |  |  |  | E [y8] - 893.4727+ (rank 3)       |  |
|              | I [y4] - 432.2453+ (rank 5)                                                              |  |  | G [y6] - 650.3257+ (rank 3)         |  |  |  | F [y6] - 693.3930+ (rank 2)       |  |
|              | 393.2195++ (heavy)                                                                       |  |  | 525.7737++ (heavy)                  |  |  |  | 751.8825++ (heavy)                |  |
|              | I [y6] - 654.3912+ (rank 4)                                                              |  |  | E [y8] - 914.4310+ (rank 1)         |  |  |  | E [y9] - 1030.5295+ (rank 1)      |  |
|              | T [y5] - 541.3072+ (rank 1)                                                              |  |  | E [y7] - 785.3884+ (rank 2)         |  |  |  | E [y8] - 901.4869+ (rank 3)       |  |
|              | I [y4] - 440.2595+ (rank 5)                                                              |  |  | G [y6] - 656.3458+ (rank 3)         |  |  |  | F [y6] - 701.4072+ (rank 2)       |  |
|              | K.IQEGVFDINNEANGIK.I [170, 185]                                                          |  |  |                                     |  |  |  |                                   |  |
|              | 880.9443++                                                                               |  |  |                                     |  |  |  |                                   |  |
|              | F [y11] - 1234.6062+ (rank 1)                                                            |  |  |                                     |  |  |  |                                   |  |
|              | D [y10] - 1087.5378+ (rank 3)                                                            |  |  |                                     |  |  |  |                                   |  |
|              | N [y8] - 859.4268+ (rank 2)                                                              |  |  |                                     |  |  |  |                                   |  |
|              | 884.9514++ (heavy)                                                                       |  |  |                                     |  |  |  |                                   |  |
|              | F [y11] - 1242.6204+ (rank 1)                                                            |  |  |                                     |  |  |  |                                   |  |
|              | D [y10] - 1095.5520+ (rank 3)                                                            |  |  |                                     |  |  |  |                                   |  |
|              | N [y8] - 867.4410+ (rank 2)                                                              |  |  |                                     |  |  |  |                                   |  |
| <b>RAB3D</b> | <b>IPI:IP100032808.1 SWISS-PROT:O95716 RAB3D Ras-related protein Rab-3D</b>              |  |  |                                     |  |  |  |                                   |  |
|              | R.DAADQNFDYMFK.L [12, 23]                                                                |  |  | K.LLLIGNSSVVGK.T [24, 34]           |  |  |  | R.LADDLGFEEFEASAK.E [152, 166]    |  |
|              | 732.8086++                                                                               |  |  | 550.8373++                          |  |  |  | 830.3987++                        |  |
|              | N [y7] - 964.4233+ (rank 1)                                                              |  |  | L [y9] - 874.4993+ (rank 2)         |  |  |  | G [y10] - 1132.5310+ (rank 1)     |  |
|              | F [y6] - 850.3804+ (rank 3)                                                              |  |  | I [y8] - 761.4152+ (rank 3)         |  |  |  | F [y9] - 1075.5095+ (rank 2)      |  |
|              | D [y5] - 703.3120+ (rank 2)                                                              |  |  | G [y7] - 648.3311+ (rank 1)         |  |  |  | E [y8] - 928.4411+ (rank 3)       |  |



|               |                                                                                            |  |                                  |  |                                         |
|---------------|--------------------------------------------------------------------------------------------|--|----------------------------------|--|-----------------------------------------|
|               | 736.8157++ (heavy)                                                                         |  | 554.8444++ (heavy)               |  | 834.4058++ (heavy)                      |
|               | N [y7] - 972.4375+ (rank 1)                                                                |  | L [y9] - 882.5135+ (rank 2)      |  | G [y10] - 1140.5452+ (rank 1)           |
|               | F [y6] - 858.3946+ (rank 3)                                                                |  | I [y8] - 769.4294+ (rank 3)      |  | F [y9] - 1083.5237+ (rank 2)            |
|               | D [y5] - 711.3262+ (rank 2)                                                                |  | G [y7] - 656.3453+ (rank 1)      |  | E [y8] - 936.4553+ (rank 3)             |
| <b>RAB36</b>  | <b>IPI:IP100032916.4 SWISS-PROT:O95755-1 RAB36 Isoform 1 of Ras-related protein Rab-36</b> |  |                                  |  |                                         |
|               | R.EHFHGQVSAACQR.R [100, 112]                                                               |  | R.FEAGIPYSLQIWDTAGQEK.F [164, 18 |  | R.VAALAFEQSVLQDLER.Q [282, 297]         |
|               | 509.5688+++                                                                                |  | 1133.5732++                      |  | 894.9782++                              |
|               | S [y6] - 692.3144+ (rank 2)                                                                |  | L [y11] - 1288.6532+ (rank 4)    |  | L [y6] - 773.4152+ (rank 1)             |
|               | A [y5] - 605.2824+ (rank 3)                                                                |  | Q [y10] - 1175.5691+ (rank 3)    |  | Q [y5] - 660.3311+ (rank 2)             |
|               | A [y4] - 534.2453+ (rank 1)                                                                |  | W [y8] - 934.4265+ (rank 1)      |  | D [y4] - 532.2726+ (rank 3)             |
|               | 511.5755+++ (heavy)                                                                        |  | 1137.5803+++ (heavy)             |  | 897.9882+++ (heavy)                     |
|               | S [y6] - 698.3346+ (rank 2)                                                                |  | L [y11] - 1296.6674+ (rank 4)    |  | L [y6] - 779.4353+ (rank 1)             |
|               | A [y5] - 611.3025+ (rank 3)                                                                |  | Q [y10] - 1183.5833+ (rank 3)    |  | Q [y5] - 666.3513+ (rank 2)             |
|               | A [y4] - 540.2654+ (rank 1)                                                                |  | W [y8] - 942.4407+ (rank 1)      |  | D [y4] - 538.2927+ (rank 3)             |
| <b>RAN</b>    | <b>IPI:IP100044779.2 TREMBL:Q0EFC9;Q96QB7 RANP1;RAN TC4 protein</b>                        |  |                                  |  |                                         |
|               | K.LVLVGDGGTGK.T [12, 22]                                                                   |  | K.YVATLGVEVHPLVFHTNR.G [38, 55]  |  | K.NVPNWHR.D [99, 105]                   |
|               | 508.2928++                                                                                 |  | 1026.5549++                      |  | 461.7357++                              |
|               | L [y9] - 803.4258+ (rank 1)                                                                |  | E [y11] - 1348.7120+ (rank 3)    |  | P [y5] - 709.3529+ (rank 1)             |
|               | V [y8] - 690.3417+ (rank 3)                                                                |  | H [y9] - 1120.6010+ (rank 2)     |  | N [y4] - 612.3001+ (rank 5)             |
|               | G [y7] - 591.2733+ (rank 2)                                                                |  | P [y8] - 983.5421+ (rank 1)      |  | W [y3] - 498.2572+ (rank 2)             |
|               | 512.2999+++ (heavy)                                                                        |  | 1029.5650+++ (heavy)             |  | 464.7458+++ (heavy)                     |
|               | L [y9] - 811.4400+ (rank 1)                                                                |  | E [y11] - 1354.7322+ (rank 3)    |  | P [y5] - 715.3730+ (rank 1)             |
|               | V [y8] - 698.3559+ (rank 3)                                                                |  | H [y9] - 1126.6212+ (rank 2)     |  | N [y4] - 618.3202+ (rank 5)             |
|               | G [y7] - 599.2875+ (rank 2)                                                                |  | P [y8] - 989.5623+ (rank 1)      |  | W [y3] - 504.2773+ (rank 2)             |
| <b>RAB40C</b> | <b>IPI:IP100045478.1 SWISS-PROT:Q96S21 RAB40C Ras-related protein Rab-40C</b>              |  |                                  |  |                                         |
|               | R.VFSLQDLCCR.A [188, 197]                                                                  |  | R.SYSLASGAGGGGSK.G [239, 252]    |  |                                         |
|               | 649.3050++                                                                                 |  | 599.7886++                       |  |                                         |
|               | S [y8] - 1051.4659+ (rank 1)                                                               |  | S [y12] - 948.4745+ (rank 3)     |  |                                         |
|               | Q [y6] - 851.3498+ (rank 2)                                                                |  | A [y10] - 748.3584+ (rank 1)     |  |                                         |
|               | D [y5] - 723.2913+ (rank 3)                                                                |  | S [y9] - 677.3213+ (rank 2)      |  |                                         |
|               | 652.3151+++ (heavy)                                                                        |  | 603.7957+++ (heavy)              |  |                                         |
|               | S [y8] - 1057.4861+ (rank 1)                                                               |  | S [y12] - 956.4887+ (rank 3)     |  |                                         |
|               | Q [y6] - 857.3700+ (rank 2)                                                                |  | A [y10] - 756.3726+ (rank 1)     |  |                                         |
|               | D [y5] - 729.3114+ (rank 3)                                                                |  | S [y9] - 685.3355+ (rank 2)      |  |                                         |
| <b>ARL11</b>  | <b>IPI:IP100056495.3 SWISS-PROT:Q969Q4 ARL11 ADP-ribosylation factor-like protein 11</b>   |  |                                  |  |                                         |
|               | R.GCSALTGEGALPEALQSLWSLLK.S [152, 173]                                                     |  |                                  |  |                                         |
|               | 1165.6067++                                                                                |  |                                  |  |                                         |
|               | P [y12] - 1384.7835+ (rank 1)                                                              |  |                                  |  |                                         |
|               | Q [y8] - 974.5669+ (rank 2)                                                                |  |                                  |  |                                         |
|               | S [y7] - 846.5084+ (rank 4)                                                                |  |                                  |  |                                         |
|               | 1169.6138+++ (heavy)                                                                       |  |                                  |  |                                         |
|               | P [y12] - 1392.7977+ (rank 1)                                                              |  |                                  |  |                                         |
|               | Q [y8] - 982.5811+ (rank 2)                                                                |  |                                  |  |                                         |
|               | S [y7] - 854.5226+ (rank 4)                                                                |  |                                  |  |                                         |
| <b>RAB24</b>  | <b>IPI:IP100056496.1 SWISS-PROT:Q969Q5 RAB24 Ras-related protein Rab-24</b>                |  |                                  |  |                                         |
|               | R.SLEEGCQIYLCGTSK.S [107, 120]                                                             |  | R.VDFHDVQDYADNIKA.A [133, 146]   |  | K.AQLFETSSK.T [147, 155]                |
|               | 829.3816++                                                                                 |  | 839.8890++                       |  | 505.7613++                              |
|               | Y [y6] - 741.3600+ (rank 1)                                                                |  | D [y10] - 1180.5481+ (rank 2)    |  | L [y7] - 811.4196+ (rank 1)             |
|               | L [y5] - 578.2967+ (rank 3)                                                                |  | Y [y6] - 723.3672+ (rank 4)      |  | F [y6] - 698.3355+ (rank 2)             |
|               | C [y4] - 465.2126+ (rank 4)                                                                |  | N [y3] - 374.2398+ (rank 3)      |  | E [y5] - 551.2671+ (rank 3)             |
|               | 833.3887+++ (heavy)                                                                        |  | 843.8961+++ (heavy)              |  | 509.7684+++ (heavy)                     |
|               | Y [y6] - 749.3742+ (rank 1)                                                                |  | D [y10] - 1188.5623+ (rank 2)    |  | L [y7] - 819.4338+ (rank 1)             |
|               | L [y5] - 586.3109+ (rank 3)                                                                |  | Y [y6] - 731.3814+ (rank 4)      |  | F [y6] - 706.3497+ (rank 2)             |
|               | C [y4] - 473.2268+ (rank 4)                                                                |  | N [y3] - 382.2540+ (rank 3)      |  | E [y5] - 559.2813+ (rank 3)             |
|               | K.TGQSVDELQK.V [156, 166]                                                                  |  |                                  |  |                                         |
|               | 626.3144++                                                                                 |  |                                  |  |                                         |
|               | S [y8] - 965.4938+ (rank 2)                                                                |  |                                  |  |                                         |
|               | D [y6] - 779.3934+ (rank 1)                                                                |  |                                  |  |                                         |
|               | F [y3] - 422.2398+ (rank 3)                                                                |  |                                  |  |                                         |
|               | 630.3215+++ (heavy)                                                                        |  |                                  |  |                                         |
|               | S [y8] - 973.5080+ (rank 2)                                                                |  |                                  |  |                                         |
|               | D [y6] - 787.4076+ (rank 1)                                                                |  |                                  |  |                                         |
|               | F [y3] - 430.2540+ (rank 3)                                                                |  |                                  |  |                                         |
| <b>RAB7B</b>  | <b>IPI:IP100059444.1 SWISS-PROT:Q96AH8 RAB7B;CEP63 Ras-related protein Rab-7b</b>          |  |                                  |  |                                         |
|               | K.IIILGDTTLK.L [48, 57]                                                                    |  | K.LQIWDGQGER.F [58, 68]          |  | R.YQSILENHLTESIK.L [174, 187]           |
|               | 362.8971+++                                                                                |  | 651.8255+++                      |  | 558.9614+++                             |
|               | D [y5] - 577.3192+ (rank 3)                                                                |  | I [y9] - 1061.5010+ (rank 2)     |  | L [y10] - 1183.6317+ (rank 3)           |
|               | L [y2] - 260.1969+ (rank 1)                                                                |  | W [y8] - 948.4170+ (rank 1)      |  | N [y8] - 941.5051+ (rank 2)             |
|               | K [y1] - 147.1128+ (rank 2)                                                                |  | D [y7] - 762.3377+ (rank 3)      |  | T [y5] - 577.3192+ (rank 5)             |
|               | 365.5685+++ (heavy)                                                                        |  | 654.8355+++ (heavy)              |  | 561.6328+++ (heavy)                     |
|               | D [y5] - 585.3334+ (rank 3)                                                                |  | I [y9] - 1067.5212+ (rank 2)     |  | L [y10] - 1191.6459+ (rank 3)           |
|               | L [y2] - 268.2111+ (rank 1)                                                                |  | W [y8] - 954.4371+ (rank 1)      |  | N [y8] - 949.5193+ (rank 2)             |
|               | K [y1] - 155.1270+ (rank 2)                                                                |  | D [y7] - 768.3578+ (rank 3)      |  | T [y5] - 585.3334+ (rank 5)             |
| <b>ARL8A</b>  | <b>IPI:IP100060031.3 SWISS-PROT:Q96BM9 ARL8A ADP-ribosylation factor-like protein 8A</b>   |  |                                  |  |                                         |
|               | K.LWDIGGQPR.F [68, 76]                                                                     |  | R.GVSAIVYMVDAADQEK.I [87, 102]   |  | R.DLPGALDEKELIEK.M [132, 145] (missed 1 |
|               | 521.2774++                                                                                 |  | 848.4165++                       |  | 785.4222++                              |
|               | D [y7] - 742.3842+ (rank 1)                                                                |  | Y [y10] - 1169.5143+ (rank 1)    |  | L [y9] - 1116.6147+ (rank 2)            |

|               |                                                                                                                              |  |                                     |  |                              |
|---------------|------------------------------------------------------------------------------------------------------------------------------|--|-------------------------------------|--|------------------------------|
|               | I [y6] - 627.3573+ (rank 4)                                                                                                  |  | D [y7] - 776.3421+ (rank 2)         |  | D [y8] - 1003.5306+ (rank 1) |
|               | G [y5] - 514.2732+ (rank 2)                                                                                                  |  | D [y4] - 519.2409+ (rank 4)         |  | E [y7] - 888.5037+ (rank 3)  |
|               | 524.2875++ (heavy)                                                                                                           |  | 852.4236++ (heavy)                  |  | 793.4364++ (heavy)           |
|               | D [y7] - 748.4044+ (rank 1)                                                                                                  |  | Y [y10] - 1177.5285+ (rank 1)       |  | L [y9] - 1132.6431+ (rank 2) |
|               | I [y6] - 633.3774+ (rank 4)                                                                                                  |  | D [y7] - 784.3563+ (rank 2)         |  | D [y8] - 1019.5590+ (rank 1) |
|               | G [y5] - 520.2933+ (rank 2)                                                                                                  |  | D [y4] - 527.2551+ (rank 4)         |  | E [y7] - 904.5321+ (rank 3)  |
|               |                                                                                                                              |  | 565.9468+++                         |  |                              |
|               |                                                                                                                              |  | D [y7] - 776.3421+ (rank 1)         |  |                              |
|               |                                                                                                                              |  | A [y6] - 661.3151+ (rank 4)         |  |                              |
|               |                                                                                                                              |  | A [y5] - 590.2780+ (rank 3)         |  |                              |
|               |                                                                                                                              |  | 568.6182+++ (heavy)                 |  |                              |
|               |                                                                                                                              |  | D [y7] - 784.3563+ (rank 1)         |  |                              |
|               |                                                                                                                              |  | A [y6] - 669.3293+ (rank 4)         |  |                              |
|               |                                                                                                                              |  | A [y5] - 598.2922+ (rank 3)         |  |                              |
| <b>RAB39B</b> | <b>IPI:IP100060801.1 SWISS-PROT:Q96DA2 RAB39B Ras-related protein Rab-39B</b>                                                |  |                                     |  |                              |
|               | R.SFQNVHEWLEETK.V [95, 107]                                                                                                  |  | K.CDLDTQR.Q [124, 130]              |  | K.LAAAYGMK.Y [140, 147]      |
|               | 549.5985+++                                                                                                                  |  | 454.2005++                          |  | 412.7204++                   |
|               | H [y8] - 1071.5106+ (rank 2)                                                                                                 |  | L [y5] - 632.3362+ (rank 1)         |  | A [y7] - 711.3494+ (rank 3)  |
|               | E [y7] - 934.4516+ (rank 5)                                                                                                  |  | D [y4] - 519.2522+ (rank 3)         |  | A [y6] - 640.3123+ (rank 1)  |
|               | W [y6] - 805.4090+ (rank 4)                                                                                                  |  | T [y3] - 404.2252+ (rank 2)         |  | Y [y4] - 498.2381+ (rank 4)  |
|               | 552.2699+++ (heavy)                                                                                                          |  | 457.2106++ (heavy)                  |  | 416.7275++ (heavy)           |
|               | H [y8] - 1079.5247+ (rank 2)                                                                                                 |  | L [y5] - 638.3563+ (rank 1)         |  | A [y7] - 719.3636+ (rank 3)  |
|               | E [y7] - 942.4658+ (rank 5)                                                                                                  |  | D [y4] - 525.2723+ (rank 3)         |  | A [y6] - 648.3265+ (rank 1)  |
|               | W [y6] - 813.4232+ (rank 4)                                                                                                  |  | T [y3] - 410.2453+ (rank 2)         |  | Y [y4] - 506.2523+ (rank 4)  |
|               | K.YIETSAR.D [148, 154]                                                                                                       |  | K.SGFVPPNVVHSSEEVV.K.S [190, 205]   |  |                              |
|               | 420.2165++                                                                                                                   |  | 571.9651+++                         |  |                              |
|               | I [y6] - 676.3624+ (rank 3)                                                                                                  |  | V [y9] - 1013.5262+ (rank 4)        |  |                              |
|               | E [y5] - 563.2784+ (rank 1)                                                                                                  |  | H [y8] - 914.4578+ (rank 1)         |  |                              |
|               | T [y4] - 434.2358+ (rank 2)                                                                                                  |  | S [y7] - 777.3989+ (rank 5)         |  |                              |
|               | 423.2266++ (heavy)                                                                                                           |  | 574.6365+++ (heavy)                 |  |                              |
|               | I [y6] - 682.3826+ (rank 3)                                                                                                  |  | V [y9] - 1021.5404+ (rank 4)        |  |                              |
|               | E [y5] - 569.2985+ (rank 1)                                                                                                  |  | H [y8] - 922.4720+ (rank 1)         |  |                              |
|               | T [y4] - 440.2559+ (rank 2)                                                                                                  |  | S [y7] - 785.4131+ (rank 5)         |  |                              |
| <b>DIRAS2</b> | <b>IPI:IP100063302.1 SWISS-PROT:Q96HU8 DIRAS2 GTP-binding protein Di-Ras2</b>                                                |  |                                     |  |                              |
|               | R.VAVFGAGGVGK.S [9, 19]                                                                                                      |  | K.SICTLQITDTTGSHPQFPAMQR.L [52, 72] |  |                              |
|               | 481.2769++                                                                                                                   |  | 798.0510+++                         |  |                              |
|               | A [y10] - 862.4781+ (rank 3)                                                                                                 |  | Q [y7] - 877.4349+ (rank 4)         |  |                              |
|               | F [y8] - 692.3726+ (rank 2)                                                                                                  |  | F [y6] - 749.3763+ (rank 2)         |  |                              |
|               | G [y7] - 545.3042+ (rank 1)                                                                                                  |  | P [y5] - 602.3079+ (rank 1)         |  |                              |
|               | 485.2840++ (heavy)                                                                                                           |  | 800.0577+++ (heavy)                 |  |                              |
|               | A [y10] - 870.4923+ (rank 3)                                                                                                 |  | Q [y7] - 883.4550+ (rank 4)         |  |                              |
|               | F [y8] - 700.3868+ (rank 2)                                                                                                  |  | F [y6] - 755.3964+ (rank 2)         |  |                              |
|               | G [y7] - 553.3184+ (rank 1)                                                                                                  |  | P [y5] - 608.3280+ (rank 1)         |  |                              |
| <b>RAB2B</b>  | <b>IPI:IP100064352.5 TRMBL:Q96K32 RAB2B cDNA FLJ14824 fis, clone OVARC1000771, moderately similar to RAS-RELATED PROTEIN</b> |  |                                     |  |                              |
|               | R.ETFNHLTSWLEDAR.Q [26, 39]                                                                                                  |  | K.REEGEAFAR.E [65, 73] (missed 1)   |  | K.TACNVVEAFINTAK.E [86, 99]  |
|               | 859.9103+++                                                                                                                  |  | 532.7596++                          |  | 784.3747++                   |
|               | L [y9] - 1090.5527+ (rank 2)                                                                                                 |  | E [y8] - 908.4108+ (rank 2)         |  | E [y9] - 1022.5153+ (rank 1) |
|               | T [y8] - 977.4687+ (rank 1)                                                                                                  |  | E [y7] - 779.3682+ (rank 4)         |  | I [y5] - 546.3246+ (rank 2)  |
|               | S [y7] - 876.4210+ (rank 3)                                                                                                  |  | A [y4] - 464.2616+ (rank 3)         |  | N [y4] - 433.2405+ (rank 3)  |
|               | 862.9203++ (heavy)                                                                                                           |  | 538.7797++ (heavy)                  |  | 788.3818++ (heavy)           |
|               | L [y9] - 1096.5729+ (rank 2)                                                                                                 |  | E [y8] - 914.4310+ (rank 2)         |  | E [y9] - 1030.5295+ (rank 1) |
|               | T [y8] - 983.4888+ (rank 1)                                                                                                  |  | E [y7] - 785.3884+ (rank 4)         |  | I [y5] - 554.3388+ (rank 2)  |
|               | S [y7] - 882.4411+ (rank 3)                                                                                                  |  | A [y4] - 470.2817+ (rank 3)         |  | N [y4] - 441.2547+ (rank 3)  |
| <b>RAB37</b>  | <b>IPI:IP100073180.8 SWISS-PROT:Q96AX2 RAB37 Ras-related protein Rab-37</b>                                                  |  |                                     |  |                              |
|               | R.SPPECSPSYDLTGK.V [18, 30]                                                                                                  |  | K.VMLLGDTGVGK.T [31, 41]            |  | K.TCFLIQFK.D [42, 49]        |
|               | 704.8243+++                                                                                                                  |  | 545.3023+++                         |  | 528.7810++                   |
|               | P [y11] - 1224.5565+ (rank 1)                                                                                                |  | L [y9] - 859.4884+ (rank 3)         |  | F [y6] - 795.4763+ (rank 1)  |
|               | S [y9] - 967.4731+ (rank 5)                                                                                                  |  | L [y8] - 746.4043+ (rank 2)         |  | L [y5] - 648.4079+ (rank 4)  |
|               | P [y8] - 880.4411+ (rank 3)                                                                                                  |  | G [y7] - 633.3202+ (rank 1)         |  | I [y4] - 535.3239+ (rank 3)  |
|               | 708.8314++ (heavy)                                                                                                           |  | 549.3094++ (heavy)                  |  | 532.7881++ (heavy)           |
|               | P [y11] - 1232.5707+ (rank 1)                                                                                                |  | L [y9] - 867.5026+ (rank 3)         |  | F [y6] - 803.4905+ (rank 1)  |
|               | S [y9] - 975.4873+ (rank 5)                                                                                                  |  | L [y8] - 754.4185+ (rank 2)         |  | L [y5] - 656.4221+ (rank 4)  |
|               | P [y8] - 888.4553+ (rank 3)                                                                                                  |  | G [y7] - 641.3344+ (rank 1)         |  | I [y4] - 543.3381+ (rank 3)  |
|               | R.AGHQADEPSFQIR.D [194, 206]                                                                                                 |  |                                     |  |                              |
|               | 485.9040+++                                                                                                                  |  |                                     |  |                              |
|               | P [y6] - 747.4148+ (rank 2)                                                                                                  |  |                                     |  |                              |
|               | S [y5] - 650.3620+ (rank 1)                                                                                                  |  |                                     |  |                              |
|               | F [y4] - 563.3300+ (rank 3)                                                                                                  |  |                                     |  |                              |
|               | 487.9107+++ (heavy)                                                                                                          |  |                                     |  |                              |
|               | P [y6] - 753.4349+ (rank 2)                                                                                                  |  |                                     |  |                              |
|               | S [y5] - 656.3822+ (rank 1)                                                                                                  |  |                                     |  |                              |
|               | F [y4] - 569.3501+ (rank 3)                                                                                                  |  |                                     |  |                              |
| <b>ARL5B</b>  | <b>IPI:IP100102036.1 SWISS-PROT:Q96KC2 ARL5B ADP-ribosylation factor-like protein 5B</b>                                     |  |                                     |  |                              |
|               | K.LWSLFCNQEHK.V [7, 17]                                                                                                      |  | K.NTHFLMWDIGGQESLR.S [58, 73]       |  | K.AAVLIFANK.Q [117, 125]     |
|               | 487.9030+++                                                                                                                  |  | 635.3088+++                         |  | 473.7897++                   |
|               | F [y7] - 962.4149+ (rank 1)                                                                                                  |  | G [y7] - 746.3791+ (rank 1)         |  | L [y6] - 705.4294+ (rank 3)  |
|               | C [y6] - 815.3465+ (rank 2)                                                                                                  |  | G [y6] - 689.3577+ (rank 2)         |  | I [y5] - 592.3453+ (rank 2)  |

|              |                                                                                            |  |                                 |  |                                   |
|--------------|--------------------------------------------------------------------------------------------|--|---------------------------------|--|-----------------------------------|
|              | N [y5] - 655.3158+ (rank 5)                                                                |  | E [y4] - 504.2776+ (rank 3)     |  | F [y4] - 479.2613+ (rank 1)       |
|              | 490.5744+++ (heavy)                                                                        |  | 637.3155+++ (heavy)             |  | 477.7968++ (heavy)                |
|              | F [y7] - 970.4291+ (rank 1)                                                                |  | G [y7] - 752.3993+ (rank 1)     |  | L [y6] - 713.4436+ (rank 3)       |
|              | C [y6] - 823.3607+ (rank 2)                                                                |  | G [y6] - 695.3778+ (rank 2)     |  | I [y5] - 600.3595+ (rank 2)       |
|              | N [y5] - 663.3300+ (rank 5)                                                                |  | E [y4] - 510.2978+ (rank 3)     |  | F [y4] - 487.2755+ (rank 1)       |
|              | K.GCMTAAEISK.Y [130, 139]                                                                  |  |                                 |  |                                   |
|              | 534.2466++                                                                                 |  |                                 |  |                                   |
|              | M [y8] - 850.4339+ (rank 2)                                                                |  |                                 |  |                                   |
|              | T [y7] - 719.3934+ (rank 1)                                                                |  |                                 |  |                                   |
|              | A [y6] - 618.3457+ (rank 3)                                                                |  |                                 |  |                                   |
|              | 538.2537++ (heavy)                                                                         |  |                                 |  |                                   |
|              | M [y8] - 858.4481+ (rank 2)                                                                |  |                                 |  |                                   |
|              | T [y7] - 727.4076+ (rank 1)                                                                |  |                                 |  |                                   |
|              | A [y6] - 626.3599+ (rank 3)                                                                |  |                                 |  |                                   |
| <b>RAB2B</b> | <b>IPI:IP100102896.1 SWISS-PROT:Q8WUD1 RAB2B Ras-related protein Rab-2B</b>                |  |                                 |  |                                   |
|              | R.MVNIDGK.Q [46, 52]                                                                       |  | K.IQQGLFDVHNEANGIK.I [170, 185] |  | K.IGPQQSISTSVGPSASQR.N [186, 203] |
|              | 388.7022++                                                                                 |  | 891.9603++                      |  | 900.4659++                        |
|              | V [y6] - 645.3566+ (rank 5)                                                                |  | F [y11] - 1243.6066+ (rank 3)   |  | S [y11] - 1076.5331+ (rank 2)     |
|              | N [y5] - 546.2882+ (rank 3)                                                                |  | N [y7] - 745.3839+ (rank 2)     |  | S [y9] - 888.4534+ (rank 3)       |
|              | D [y3] - 319.1612+ (rank 1)                                                                |  | G [y3] - 317.2183+ (rank 1)     |  | G [y7] - 702.3529+ (rank 1)       |
|              | 392.7093++ (heavy)                                                                         |  | 895.9674++ (heavy)              |  | 903.4760++ (heavy)                |
|              | V [y6] - 653.3708+ (rank 5)                                                                |  | F [y11] - 1251.6208+ (rank 3)   |  | S [y11] - 1082.5532+ (rank 2)     |
|              | N [y5] - 554.3024+ (rank 3)                                                                |  | N [y7] - 753.3981+ (rank 2)     |  | S [y9] - 894.4735+ (rank 3)       |
|              | D [y3] - 327.1754+ (rank 1)                                                                |  | G [y3] - 325.2325+ (rank 1)     |  | G [y7] - 708.3731+ (rank 1)       |
| <b>RABL3</b> | <b>IPI:IP100102897.4 SWISS-PROT:Q5HYI8 RABL3 Rab-like protein 3</b>                        |  |                                 |  |                                   |
|              | R.WSLEALNR.D [108, 115]                                                                    |  | R.YLAAGSSNAVK.L [184, 194]      |  | R.EGNQIPGFDPDR.K [211, 221]       |
|              | 494.7642++                                                                                 |  | 540.7878++                      |  | 615.2991++                        |
|              | L [y6] - 715.4097+ (rank 1)                                                                |  | A [y9] - 804.4210+ (rank 1)     |  | I [y7] - 801.4254+ (rank 3)       |
|              | E [y5] - 602.3257+ (rank 2)                                                                |  | A [y8] - 733.3839+ (rank 3)     |  | P [y6] - 688.3413+ (rank 1)       |
|              | A [y4] - 473.2831+ (rank 3)                                                                |  | G [y7] - 662.3468+ (rank 2)     |  | P [y3] - 387.1987+ (rank 2)       |
|              | 497.7742++ (heavy)                                                                         |  | 544.7949++ (heavy)              |  | 618.3092++ (heavy)                |
|              | L [y6] - 721.4298+ (rank 1)                                                                |  | A [y9] - 812.4352+ (rank 1)     |  | I [y7] - 807.4455+ (rank 3)       |
|              | E [y5] - 608.3458+ (rank 2)                                                                |  | A [y8] - 741.3981+ (rank 3)     |  | P [y6] - 694.3614+ (rank 1)       |
|              | A [y4] - 479.3032+ (rank 3)                                                                |  | G [y7] - 670.3610+ (rank 2)     |  | P [y3] - 393.2188+ (rank 2)       |
| <b>RRAGA</b> | <b>IPI:IP100105620.2 SWISS-PROT:Q7L523 RRAGA Ras-related GTP-binding protein A</b>         |  |                                 |  |                                   |
|              | R.LGATIDVEHSHVR.F [38, 50]                                                                 |  | R.NFAQIIEADEVLLFER.A [192, 207] |  |                                   |
|              | 478.5880+++                                                                                |  | 953.9991++                      |  |                                   |
|              | E [y6] - 764.3798+                                                                         |  | A [y9] - 1091.5732+ (rank 5)    |  |                                   |
|              | H [y5] - 635.3372+                                                                         |  | D [y8] - 1020.5360+ (rank 3)    |  |                                   |
|              | S [y4] - 498.2783+                                                                         |  | L [y4] - 564.3140+ (rank 2)     |  |                                   |
|              | 480.5947+++ (heavy)                                                                        |  | 957.0092++ (heavy)              |  |                                   |
|              | E [y6] - 770.3999+                                                                         |  | A [y9] - 1097.5933+ (rank 5)    |  |                                   |
|              | H [y5] - 641.3573+                                                                         |  | D [y8] - 1026.5562+ (rank 3)    |  |                                   |
|              | S [y4] - 504.2984+                                                                         |  | L [y4] - 570.3342+ (rank 2)     |  |                                   |
|              |                                                                                            |  | 636.3352+++                     |  |                                   |
|              |                                                                                            |  | L [y5] - 677.3981+ (rank 3)     |  |                                   |
|              |                                                                                            |  | L [y4] - 564.3140+ (rank 2)     |  |                                   |
|              |                                                                                            |  | F [y3] - 451.2300+ (rank 1)     |  |                                   |
|              |                                                                                            |  | 638.3419+++ (heavy)             |  |                                   |
|              |                                                                                            |  | L [y5] - 683.4182+ (rank 3)     |  |                                   |
|              |                                                                                            |  | L [y4] - 570.3342+ (rank 2)     |  |                                   |
|              |                                                                                            |  | F [y3] - 457.2501+ (rank 1)     |  |                                   |
| <b>RABL6</b> | <b>IPI:IP100186586.10 TREMBL:C9JJY3 C9orf86 Putative uncharacterized protein C9orf86</b>   |  |                                 |  |                                   |
|              | K.LVGSDQAPGR.D [7, 16]                                                                     |  | K.NIPAGLQSMNQALQR.R [19, 33]    |  | K.FFNIPFLQLQR.E [226, 236]        |
|              | 500.2645++                                                                                 |  | 820.9305++                      |  | 711.8983++                        |
|              | G [y8] - 787.3693+ (rank 1)                                                                |  | Q [y9] - 1075.5313+ (rank 2)    |  | I [y8] - 1014.6095+ (rank 3)      |
|              | A [y4] - 400.2303+ (rank 3)                                                                |  | S [y8] - 947.4727+ (rank 3)     |  | P [y7] - 901.5254+ (rank 1)       |
|              | P [y3] - 329.1932+ (rank 2)                                                                |  | N [y6] - 729.4002+ (rank 4)     |  | Q [y4] - 544.3202+ (rank 2)       |
|              | 503.2746++ (heavy)                                                                         |  | 823.9406++ (heavy)              |  | 714.9083++ (heavy)                |
|              | G [y8] - 793.3894+ (rank 1)                                                                |  | Q [y9] - 1081.5514+ (rank 2)    |  | I [y8] - 1020.6296+ (rank 3)      |
|              | A [y4] - 406.2504+ (rank 3)                                                                |  | S [y8] - 953.4929+ (rank 3)     |  | P [y7] - 907.5455+ (rank 1)       |
|              | P [y3] - 335.2133+ (rank 2)                                                                |  | N [y6] - 735.4203+ (rank 4)     |  | Q [y4] - 550.3403+ (rank 2)       |
| <b>RAB4B</b> | <b>IPI:IP100187143.1 SWISS-PROT:P61018-2 RAB4B Isoform 2 of Ras-related protein Rab-4B</b> |  |                                 |  |                                   |
|              | K.FLVIGSAGTGK.S [45, 55]                                                                   |  | K.SCLLHQFIENK.F [56, 66]        |  | K.IDSGELDPER.M [207, 216]         |
|              | 525.3031++                                                                                 |  | 694.8532++                      |  | 565.7698++                        |
|              | V [y9] - 789.4465+ (rank 2)                                                                |  | H [y7] - 915.4683+ (rank 1)     |  | S [y8] - 902.4214+ (rank 3)       |
|              | I [y8] - 690.3781+ (rank 1)                                                                |  | Q [y6] - 778.4094+ (rank 3)     |  | L [y5] - 629.3253+ (rank 2)       |
|              | G [y7] - 577.2940+ (rank 3)                                                                |  | F [y5] - 650.3508+ (rank 2)     |  | D [y4] - 516.2413+ (rank 1)       |
|              | 529.3102++ (heavy)                                                                         |  | 698.8603++ (heavy)              |  | 568.7799++ (heavy)                |
|              | V [y9] - 797.4607+ (rank 2)                                                                |  | H [y7] - 923.4825+ (rank 1)     |  | S [y8] - 908.4415+ (rank 3)       |
|              | I [y8] - 698.3923+ (rank 1)                                                                |  | Q [y6] - 786.4236+ (rank 3)     |  | L [y5] - 635.3454+ (rank 2)       |
|              | G [y7] - 585.3082+ (rank 3)                                                                |  | F [y5] - 658.3650+ (rank 2)     |  | D [y4] - 522.2614+ (rank 1)       |
|              | R.MGSGIQYGDASLR.Q [217, 229]                                                               |  |                                 |  |                                   |
|              | 677.8246++                                                                                 |  |                                 |  |                                   |
|              | Q [y8] - 909.4425+ (rank 1)                                                                |  |                                 |  |                                   |
|              | Y [y7] - 781.3839+ (rank 2)                                                                |  |                                 |  |                                   |
|              | G [y6] - 618.3206+ (rank 3)                                                                |  |                                 |  |                                   |

|             |                                                                           |  |                                     |  |  |  |                                   |  |  |
|-------------|---------------------------------------------------------------------------|--|-------------------------------------|--|--|--|-----------------------------------|--|--|
|             | 680.8347++ (heavy)                                                        |  |                                     |  |  |  |                                   |  |  |
|             | Q [y8] - 915.4626+ (rank 1)                                               |  |                                     |  |  |  |                                   |  |  |
|             | Y [y7] - 787.4040+ (rank 2)                                               |  |                                     |  |  |  |                                   |  |  |
|             | G [y6] - 624.3407+ (rank 3)                                               |  |                                     |  |  |  |                                   |  |  |
| <b>ARF1</b> | <b>IPI:IP100215914.5 SWISS-PROT:P84077 ARF1 ADP-ribosylation factor 1</b> |  |                                     |  |  |  |                                   |  |  |
|             | K.NISFTVWDVGGQDK.I [59, 72]                                               |  | K.QDLPNAMNAAEITDK.L [127, 141]      |  |  |  | K.QDLPNAMNAAEITDK.L [127, 141]    |  |  |
|             | 783.3834++                                                                |  | 815.8907++                          |  |  |  | 823.8882++                        |  |  |
|             | W [y8] - 904.4159+ (rank 1)                                               |  | M [y9] - 992.4717+ (rank 3)         |  |  |  | M [y9] - 1008.4666+ (rank 2)      |  |  |
|             | D [y7] - 718.3366+ (rank 3)                                               |  | N [y8] - 861.4312+ (rank 2)         |  |  |  | N [y8] - 861.4312+ (rank 3)       |  |  |
|             | G [y5] - 504.2413+ (rank 4)                                               |  | A [y6] - 676.3512+ (rank 4)         |  |  |  | I [y4] - 476.2715+ (rank 4)       |  |  |
|             | 787.3905++ (heavy)                                                        |  | 819.8978++ (heavy)                  |  |  |  | 827.8953++ (heavy)                |  |  |
|             | W [y8] - 912.4301+ (rank 1)                                               |  | M [y9] - 1000.4859+ (rank 3)        |  |  |  | M [y9] - 1016.4808+ (rank 2)      |  |  |
|             | D [y7] - 726.3508+ (rank 3)                                               |  | N [y8] - 869.4454+ (rank 2)         |  |  |  | N [y8] - 869.4454+ (rank 3)       |  |  |
|             | G [y5] - 512.2555+ (rank 4)                                               |  | A [y6] - 684.3654+ (rank 4)         |  |  |  | I [y4] - 484.2857+ (rank 4)       |  |  |
| <b>ARF3</b> | <b>IPI:IP100215917.3 SWISS-PROT:P61204 ARF3 ADP-ribosylation factor 3</b> |  |                                     |  |  |  |                                   |  |  |
|             | R.VNEAREELMR.M [99, 108] (missed 1)                                       |  | R.VNEAREELMR.M [99, 108] (missed 1) |  |  |  | K.LGLHSLR.H [142, 148]            |  |  |
|             | 623.8141++                                                                |  | 631.8115++                          |  |  |  | 398.2454++                        |  |  |
|             | E [y5] - 677.3287+ (rank 3)                                               |  | N [y9] - 1163.5473+ (rank 3)        |  |  |  | G [y6] - 682.3995+ (rank 3)       |  |  |
|             | E [y4] - 548.2861+ (rank 2)                                               |  | A [y7] - 920.4618+ (rank 2)         |  |  |  | H [y4] - 512.2940+ (rank 1)       |  |  |
|             | L [y3] - 419.2435+ (rank 1)                                               |  | L [y3] - 435.2384+ (rank 4)         |  |  |  | S [y3] - 375.2350+ (rank 2)       |  |  |
|             | 629.8342++ (heavy)                                                        |  | 637.8316++ (heavy)                  |  |  |  | 401.2555++ (heavy)                |  |  |
|             | E [y5] - 683.3488+ (rank 3)                                               |  | N [y9] - 1175.5876+ (rank 3)        |  |  |  | G [y6] - 688.4196+ (rank 3)       |  |  |
|             | E [y4] - 554.3062+ (rank 2)                                               |  | A [y7] - 932.5021+ (rank 2)         |  |  |  | H [y4] - 518.3141+ (rank 1)       |  |  |
|             | L [y3] - 425.2636+ (rank 1)                                               |  | L [y3] - 441.2585+ (rank 4)         |  |  |  | S [y3] - 381.2552+ (rank 2)       |  |  |
| <b>ARF4</b> | <b>IPI:IP100215918.3 SWISS-PROT:P18085 ARF4 ADP-ribosylation factor 4</b> |  |                                     |  |  |  |                                   |  |  |
|             | K.NICFTVWDVGGQDR.I [59, 72]                                               |  | R.IQEVADQLK.M [99, 108]             |  |  |  | R.DAVLLLFANK.Q [117, 126]         |  |  |
|             | 833.8857++                                                                |  | 586.8115++                          |  |  |  | 552.3266++                        |  |  |
|             | W [y8] - 932.4221+ (rank 1)                                               |  | E [y8] - 931.4731+ (rank 1)         |  |  |  | L [y7] - 818.5135+ (rank 2)       |  |  |
|             | D [y7] - 746.3428+ (rank 3)                                               |  | V [y7] - 802.4305+ (rank 3)         |  |  |  | L [y6] - 705.4294+ (rank 3)       |  |  |
|             | G [y5] - 532.2474+ (rank 2)                                               |  | A [y6] - 703.3621+ (rank 2)         |  |  |  | F [y4] - 479.2613+ (rank 1)       |  |  |
|             | 836.8958++ (heavy)                                                        |  | 590.8186++ (heavy)                  |  |  |  | 556.3337++ (heavy)                |  |  |
|             | W [y8] - 938.4422+ (rank 1)                                               |  | E [y8] - 939.4873+ (rank 1)         |  |  |  | L [y7] - 826.5277+ (rank 2)       |  |  |
|             | D [y7] - 752.3629+ (rank 3)                                               |  | V [y7] - 810.4447+ (rank 3)         |  |  |  | L [y6] - 713.4436+ (rank 3)       |  |  |
|             | G [y5] - 538.2675+ (rank 2)                                               |  | A [y6] - 711.3763+ (rank 2)         |  |  |  | F [y4] - 487.2755+ (rank 1)       |  |  |
|             | K.LGLQSLR.N [142, 148]                                                    |  |                                     |  |  |  |                                   |  |  |
|             | 393.7452++                                                                |  |                                     |  |  |  |                                   |  |  |
|             | G [y6] - 673.3991+ (rank 3)                                               |  |                                     |  |  |  |                                   |  |  |
|             | Q [y4] - 503.2936+ (rank 1)                                               |  |                                     |  |  |  |                                   |  |  |
|             | S [y3] - 375.2350+ (rank 2)                                               |  |                                     |  |  |  |                                   |  |  |
|             | 396.7553++ (heavy)                                                        |  |                                     |  |  |  |                                   |  |  |
|             | G [y6] - 679.4193+ (rank 3)                                               |  |                                     |  |  |  |                                   |  |  |
|             | Q [y4] - 509.3138+ (rank 1)                                               |  |                                     |  |  |  |                                   |  |  |
|             | S [y3] - 381.2552+ (rank 2)                                               |  |                                     |  |  |  |                                   |  |  |
| <b>ARF5</b> | <b>IPI:IP100215919.5 SWISS-PROT:P84085 ARF5 ADP-ribosylation factor 5</b> |  |                                     |  |  |  |                                   |  |  |
|             | K.NICFTVWDVGGQDK.I [59, 72]                                               |  | R.VQESADELQK.M [99, 108]            |  |  |  | K.LGLQHLSR.S [142, 148]           |  |  |
|             | 819.8827++                                                                |  | 573.7855++                          |  |  |  | 418.7587++                        |  |  |
|             | T [y10] - 1104.5320+ (rank 3)                                             |  | E [y8] - 919.4367+ (rank 1)         |  |  |  | G [y6] - 723.4260+ (rank 5)       |  |  |
|             | W [y8] - 904.4159+ (rank 1)                                               |  | S [y7] - 790.3941+ (rank 2)         |  |  |  | Q [y4] - 553.3205+ (rank 1)       |  |  |
|             | D [y7] - 718.3366+ (rank 2)                                               |  | D [y5] - 632.3250+ (rank 3)         |  |  |  | H [y3] - 425.2619+ (rank 2)       |  |  |
|             | 823.8898++ (heavy)                                                        |  | 577.7926++ (heavy)                  |  |  |  | 421.7688++ (heavy)                |  |  |
|             | T [y10] - 1112.5462+ (rank 3)                                             |  | E [y8] - 927.4509+ (rank 1)         |  |  |  | G [y6] - 729.4462+ (rank 5)       |  |  |
|             | W [y8] - 912.4301+ (rank 1)                                               |  | S [y7] - 798.4083+ (rank 2)         |  |  |  | Q [y4] - 559.3406+ (rank 1)       |  |  |
|             | D [y7] - 726.3508+ (rank 2)                                               |  | D [y5] - 640.3392+ (rank 3)         |  |  |  | H [y3] - 431.2821+ (rank 2)       |  |  |
| <b>ARF6</b> | <b>IPI:IP100215920.8 SWISS-PROT:P62330 ARF6 ADP-ribosylation factor 6</b> |  |                                     |  |  |  |                                   |  |  |
|             | R.ILMLGLDAAGK.T [15, 25]                                                  |  | R.ILMLGLDAAGK.T [15, 25]            |  |  |  | K.LGQSVTTIPTVGFNVETVTK.N [34, 54] |  |  |
|             | 551.3205++                                                                |  | 559.3179++                          |  |  |  | 1127.6019++                       |  |  |
|             | M [y9] - 875.4655+ (rank 1)                                               |  | M [y9] - 891.4604+ (rank 2)         |  |  |  | G [y10] - 1157.5837+ (rank 2)     |  |  |
|             | L [y8] - 744.4250+ (rank 3)                                               |  | L [y8] - 744.4250+ (rank 3)         |  |  |  | N [y8] - 953.4938+ (rank 3)       |  |  |
|             | G [y7] - 631.3410+ (rank 2)                                               |  | G [y7] - 631.3410+ (rank 1)         |  |  |  | E [y6] - 740.3825+ (rank 4)       |  |  |
|             | 555.3276++ (heavy)                                                        |  | 563.3250++ (heavy)                  |  |  |  | 1131.6090++ (heavy)               |  |  |
|             | M [y9] - 883.4797+ (rank 1)                                               |  | M [y9] - 899.4746+ (rank 2)         |  |  |  | G [y10] - 1165.5979+ (rank 2)     |  |  |
|             | L [y8] - 752.4392+ (rank 3)                                               |  | L [y8] - 752.4392+ (rank 3)         |  |  |  | N [y8] - 961.5080+ (rank 3)       |  |  |
|             | G [y7] - 639.3552+ (rank 2)                                               |  | G [y7] - 639.3552+ (rank 1)         |  |  |  | E [y6] - 748.3967+ (rank 4)       |  |  |
|             | K.FNVWDVGGQDK.I [58, 68]                                                  |  |                                     |  |  |  |                                   |  |  |
|             | 632.8015++                                                                |  |                                     |  |  |  |                                   |  |  |
|             | V [y9] - 1003.4843+ (rank 2)                                              |  |                                     |  |  |  |                                   |  |  |
|             | W [y8] - 904.4159+ (rank 1)                                               |  |                                     |  |  |  |                                   |  |  |
|             | D [y7] - 718.3366+ (rank 4)                                               |  |                                     |  |  |  |                                   |  |  |
|             | 636.8086++ (heavy)                                                        |  |                                     |  |  |  |                                   |  |  |
|             | V [y9] - 1011.4985+ (rank 2)                                              |  |                                     |  |  |  |                                   |  |  |
|             | W [y8] - 912.4301+ (rank 1)                                               |  |                                     |  |  |  |                                   |  |  |
|             | D [y7] - 726.3508+ (rank 4)                                               |  |                                     |  |  |  |                                   |  |  |
| <b>RALA</b> | <b>IPI:IP100217519.3 SWISS-PROT:P11233 RALA Ras-related protein Ral-A</b> |  |                                     |  |  |  |                                   |  |  |
|             | K.GQNSLALHK.V [7, 15]                                                     |  | K.EDENVPFLLVGNK.S [115, 127]        |  |  |  | R.QVSVEEAK.N [135, 142]           |  |  |
|             | 484.2696++                                                                |  | 737.3828++                          |  |  |  | 445.2349++                        |  |  |
|             | N [y7] - 782.4519+ (rank 1)                                               |  | P [y8] - 887.5349+ (rank 1)         |  |  |  | S [y6] - 662.3355+ (rank 1)       |  |  |
|             | S [y6] - 668.4090+ (rank 4)                                               |  | V [y4] - 417.2456+ (rank 2)         |  |  |  | V [y5] - 575.3035+ (rank 5)       |  |  |

|               |                                                                                                          |  |                                |  |                                  |
|---------------|----------------------------------------------------------------------------------------------------------|--|--------------------------------|--|----------------------------------|
|               | A [y4] - 468.2929+ (rank 5)                                                                              |  | G [y3] - 318.1772+ (rank 4)    |  | E [y4] - 476.2351+ (rank 2)      |
|               | 488.2767++ (heavy)                                                                                       |  | 741.3899++ (heavy)             |  | 449.2420++ (heavy)               |
|               | N [y7] - 790.4661+ (rank 1)                                                                              |  | P [y8] - 895.5491+ (rank 1)    |  | S [y6] - 670.3497+ (rank 1)      |
|               | S [y6] - 676.4232+ (rank 4)                                                                              |  | V [y4] - 425.2598+ (rank 2)    |  | V [y5] - 583.3177+ (rank 5)      |
|               | A [y4] - 476.3071+ (rank 5)                                                                              |  | G [y3] - 326.1914+ (rank 4)    |  | E [y4] - 484.2493+ (rank 2)      |
|               | R.AEQWNVNYVETSAK.T [145, 158]                                                                            |  |                                |  |                                  |
|               | 819.8916++                                                                                               |  |                                |  |                                  |
|               | N [y10] - 1124.5582+ (rank 2)                                                                            |  |                                |  |                                  |
|               | V [y9] - 1010.5153+ (rank 4)                                                                             |  |                                |  |                                  |
|               | N [y8] - 911.4469+ (rank 1)                                                                              |  |                                |  |                                  |
|               | 823.8987++ (heavy)                                                                                       |  |                                |  |                                  |
|               | N [y10] - 1132.5724+ (rank 2)                                                                            |  |                                |  |                                  |
|               | V [y9] - 1018.5295+ (rank 4)                                                                             |  |                                |  |                                  |
|               | N [y8] - 919.4611+ (rank 1)                                                                              |  |                                |  |                                  |
| <b>RHOT1</b>  | <b>IPI:IP00217536.3 SWISS-PROT:Q8IXI2-3 RHOT1 Isoform 3 of Mitochondrial Rho GTPase 1</b>                |  |                                |  |                                  |
|               | R.LPLILVGNK.S [110, 118]                                                                                 |  | K.AVLHPTGPLYCPEEK.E [164, 178] |  | R.ICFNTPLAPQALVDK.N [214, 229]   |
|               | 483.8210++                                                                                               |  | 570.9555+++                    |  | 908.4691++                       |
|               | L [y7] - 756.4978+ (rank 2)                                                                              |  | Y [y6] - 825.3447+ (rank 2)    |  | P [y11] - 1180.6572+ (rank 2)    |
|               | I [y6] - 643.4137+ (rank 3)                                                                              |  | C [y5] - 662.2814+ (rank 1)    |  | A [y9] - 970.5204+ (rank 3)      |
|               | L [y5] - 530.3297+ (rank 1)                                                                              |  | P [y4] - 502.2508+ (rank 3)    |  | P [y8] - 899.4833+ (rank 1)      |
|               | 487.8281++ (heavy)                                                                                       |  | 573.6269+++ (heavy)            |  | 912.4762++ (heavy)               |
|               | L [y7] - 764.5120+ (rank 2)                                                                              |  | Y [y6] - 833.3589+ (rank 2)    |  | P [y11] - 1188.6714+ (rank 2)    |
|               | I [y6] - 651.4279+ (rank 3)                                                                              |  | C [y5] - 670.2956+ (rank 1)    |  | A [y9] - 978.5346+ (rank 3)      |
|               | L [y5] - 538.3439+ (rank 1)                                                                              |  | P [y4] - 510.2650+ (rank 3)    |  | P [y8] - 907.4975+ (rank 1)      |
| <b>ARL1</b>   | <b>IPI:IP00219518.7 SWISS-PROT:P40616 ARL1 ADP-ribosylation factor-like protein 1</b>                    |  |                                |  |                                  |
|               | R.IILGLDGGAGK.T [19, 29]                                                                                 |  | K.FQVWDLGGQTSIRPYWR.C [62, 78] |  | K.AILVVFANK.Q [118, 126]         |
|               | 535.3344++                                                                                               |  | 1055.0369++                    |  | 487.8053++                       |
|               | I [y9] - 843.4934+ (rank 1)                                                                              |  | I [y6] - 890.4995+ (rank 3)    |  | L [y7] - 790.4822+ (rank 2)      |
|               | L [y8] - 730.4094+ (rank 3)                                                                              |  | P [y4] - 621.3144+ (rank 1)    |  | V [y5] - 578.3297+ (rank 3)      |
|               | G [y7] - 617.3253+ (rank 2)                                                                              |  | W [y2] - 361.1983+ (rank 5)    |  | F [y4] - 479.2613+ (rank 1)      |
|               | 539.3415++ (heavy)                                                                                       |  | 1061.0570++ (heavy)            |  | 491.8124++ (heavy)               |
|               | I [y9] - 851.5076+ (rank 1)                                                                              |  | I [y6] - 902.5398+ (rank 3)    |  | L [y7] - 798.4963+ (rank 2)      |
|               | L [y8] - 738.4236+ (rank 3)                                                                              |  | P [y4] - 627.3345+ (rank 1)    |  | V [y5] - 586.3439+ (rank 3)      |
|               | G [y7] - 625.3395+ (rank 2)                                                                              |  | W [y2] - 367.2184+ (rank 5)    |  | F [y4] - 487.2755+ (rank 1)      |
| <b>RAC1</b>   | <b>IPI:IP00219675.1 SWISS-PROT:P63000-2 RAC1 Isoform B of Ras-related C3 botulinum toxin substrate 1</b> |  |                                |  |                                  |
|               | R.LRPLSYPQTVGETYQK.D [66, 81]                                                                            |  |                                |  |                                  |
|               | 904.9807++                                                                                               |  |                                |  |                                  |
|               | P [y10] - 1079.5368+ (rank 1)                                                                            |  |                                |  |                                  |
|               | T [y8] - 854.4254+ (rank 4)                                                                              |  |                                |  |                                  |
|               | G [y6] - 654.3093+ (rank 2)                                                                              |  |                                |  |                                  |
|               | 911.9979++ (heavy)                                                                                       |  |                                |  |                                  |
|               | P [y10] - 1087.5510+ (rank 1)                                                                            |  |                                |  |                                  |
|               | T [y8] - 862.4396+ (rank 4)                                                                              |  |                                |  |                                  |
|               | G [y6] - 662.3235+ (rank 2)                                                                              |  |                                |  |                                  |
|               | 603.6562+++                                                                                              |  |                                |  |                                  |
|               | T [y8] - 854.4254+ (rank 3)                                                                              |  |                                |  |                                  |
|               | V [y7] - 753.3777+ (rank 2)                                                                              |  |                                |  |                                  |
|               | G [y6] - 654.3093+ (rank 1)                                                                              |  |                                |  |                                  |
|               | 608.3343+++ (heavy)                                                                                      |  |                                |  |                                  |
|               | T [y8] - 862.4396+ (rank 3)                                                                              |  |                                |  |                                  |
|               | V [y7] - 761.3919+ (rank 2)                                                                              |  |                                |  |                                  |
|               | G [y6] - 662.3235+ (rank 1)                                                                              |  |                                |  |                                  |
| <b>RABL2B</b> | <b>IPI:IP00220774.1 SWISS-PROT:Q9UNT1-2 RABL2B Isoform 2 of Rab-like protein 2B</b>                      |  |                                |  |                                  |
|               | K.IDADINVTQK.S [134, 143]                                                                                |  |                                |  |                                  |
|               | 558.7984++                                                                                               |  |                                |  |                                  |
|               | A [y8] - 888.4785+ (rank 1)                                                                              |  |                                |  |                                  |
|               | D [y7] - 817.4414+ (rank 3)                                                                              |  |                                |  |                                  |
|               | N [y5] - 589.3304+ (rank 2)                                                                              |  |                                |  |                                  |
|               | 562.8055++ (heavy)                                                                                       |  |                                |  |                                  |
|               | A [y8] - 896.4927+ (rank 1)                                                                              |  |                                |  |                                  |
|               | D [y7] - 825.4556+ (rank 3)                                                                              |  |                                |  |                                  |
|               | N [y5] - 597.3446+ (rank 2)                                                                              |  |                                |  |                                  |
| <b>ARL16</b>  | <b>IPI:IP00242972.2 SWISS-PROT:Q0P5N6 ARL16 ADP-ribosylation factor-like protein 16</b>                  |  |                                |  |                                  |
|               | K.GDLGEPPTPTVGTNLTDIVAQR.K [4                                                                            |  | K.QNITTAESAR.E [166, 176]      |  | R.EGTGLAGVLAWLQATHR.A [177, 193] |
|               | 835.4416+++                                                                                              |  | 602.3200++                     |  | 593.9882+++                      |
|               | T [y7] - 802.4417+ (rank 1)                                                                              |  | T [y8] - 848.4472+ (rank 1)    |  | A [y8] - 982.5217+ (rank 2)      |
|               | I [y5] - 586.3671+ (rank 3)                                                                              |  | T [y7] - 747.3995+ (rank 2)    |  | W [y7] - 911.4846+ (rank 1)      |
|               | V [y4] - 473.2831+ (rank 2)                                                                              |  | A [y6] - 646.3519+ (rank 3)    |  | L [y6] - 725.4053+ (rank 3)      |
|               | 839.4551+++ (heavy)                                                                                      |  | 605.3301++ (heavy)             |  | 595.9949+++ (heavy)              |
|               | T [y7] - 808.4619+ (rank 1)                                                                              |  | T [y8] - 854.4674+ (rank 1)    |  | A [y8] - 988.5419+ (rank 2)      |
|               | I [y5] - 592.3873+ (rank 3)                                                                              |  | T [y7] - 753.4197+ (rank 2)    |  | W [y7] - 917.5047+ (rank 1)      |
|               | V [y4] - 479.3032+ (rank 2)                                                                              |  | A [y6] - 652.3720+ (rank 3)    |  | L [y6] - 731.4254+ (rank 3)      |
| <b>REM1</b>   | <b>IPI:IP00289912.2 SWISS-PROT:O75628 REM1 GTP-binding protein REM 1</b>                                 |  |                                |  |                                  |
|               | R.LSTVPSTQSQHPR.L [32, 44]                                                                               |  | K.TSLASLFAQK.Q [93, 102]       |  | R.DLHEQLGEDVYER.T [106, 118]     |
|               | 479.9197+++                                                                                              |  | 497.7820++                     |  | 801.8734++                       |
|               | P [y9] - 1037.5123+ (rank 1)                                                                             |  | A [y7] - 693.3930+ (rank 1)    |  | E [y10] - 1237.5695+ (rank 3)    |
|               | S [y8] - 940.4595+ (rank 5)                                                                              |  | S [y6] - 622.3559+ (rank 3)    |  | L [y8] - 980.4684+ (rank 2)      |

|              |                                                                                                   |  |                                   |  |                                |
|--------------|---------------------------------------------------------------------------------------------------|--|-----------------------------------|--|--------------------------------|
|              | T [y7] - 853.4275+ (rank 4)                                                                       |  | F [y4] - 422.2398+ (rank 5)       |  | G [y7] - 867.3843+ (rank 1)    |
|              | 481.9264+++ (heavy)                                                                               |  | 501.7891++ (heavy)                |  | 804.8834++ (heavy)             |
|              | P [y9] - 1043.5324+ (rank 1)                                                                      |  | A [y7] - 701.4072+ (rank 1)       |  | E [y10] - 1243.5897+ (rank 3)  |
|              | S [y8] - 946.4796+ (rank 5)                                                                       |  | S [y6] - 630.3701+ (rank 3)       |  | L [y8] - 986.4885+ (rank 2)    |
|              | T [y7] - 859.4476+ (rank 4)                                                                       |  | F [y4] - 430.2540+ (rank 5)       |  | G [y7] - 873.4044+ (rank 1)    |
|              | R.GSFESASELR.I [166, 175]                                                                         |  |                                   |  | 534.9180+++                    |
|              | 541.7593++                                                                                        |  |                                   |  | D [y5] - 681.3202+ (rank 2)    |
|              | S [y6] - 662.3468+ (rank 1)                                                                       |  |                                   |  | V [y4] - 566.2933+ (rank 3)    |
|              | A [y5] - 575.3148+ (rank 3)                                                                       |  |                                   |  | Y [y3] - 467.2249+ (rank 1)    |
|              | S [y4] - 504.2776+ (rank 2)                                                                       |  |                                   |  | 536.9247+++ (heavy)            |
|              | 544.7693++ (heavy)                                                                                |  |                                   |  | D [y5] - 687.3404+ (rank 2)    |
|              | S [y6] - 668.3669+ (rank 1)                                                                       |  |                                   |  | V [y4] - 572.3134+ (rank 3)    |
|              | A [y5] - 581.3349+ (rank 3)                                                                       |  |                                   |  | Y [y3] - 473.2450+ (rank 1)    |
|              | S [y4] - 510.2978+ (rank 2)                                                                       |  |                                   |  |                                |
| <b>RAB14</b> | <b>IPI:IP00291928.8 SWISS-PROT:P61106 RAB14 Ras-related protein Rab-14</b>                        |  |                                   |  |                                |
|              | K.YIIIGDMGVGK.S [13, 23]                                                                          |  | R.STYNHLSSWLTDAR.N [96, 109]      |  | K.TGENVEDAFLEAAK.K [156, 169]  |
|              | 583.3179++                                                                                        |  | 825.8972++                        |  | 747.3596++                     |
|              | I [y9] - 889.4812+ (rank 1)                                                                       |  | L [y9] - 1048.5422+ (rank 2)      |  | E [y9] - 993.4888+ (rank 1)    |
|              | I [y8] - 776.3971+ (rank 3)                                                                       |  | S [y8] - 935.4581+ (rank 1)       |  | D [y8] - 864.4462+ (rank 2)    |
|              | G [y7] - 663.3130+ (rank 2)                                                                       |  | S [y7] - 848.4261+ (rank 3)       |  | F [y6] - 678.3821+ (rank 3)    |
|              | 587.3250++ (heavy)                                                                                |  | 828.9072++ (heavy)                |  | 751.3667++ (heavy)             |
|              | I [y9] - 897.4954+ (rank 1)                                                                       |  | L [y9] - 1054.5623+ (rank 2)      |  | E [y9] - 1001.5030+ (rank 1)   |
|              | I [y8] - 784.4113+ (rank 3)                                                                       |  | S [y8] - 941.4782+ (rank 1)       |  | D [y8] - 872.4604+ (rank 2)    |
|              | G [y7] - 671.3272+ (rank 2)                                                                       |  | S [y7] - 854.4462+ (rank 3)       |  | F [y6] - 686.3963+ (rank 3)    |
| <b>SRPRB</b> | <b>IPI:IP00295098.3 SWISS-PROT:Q9Y5M8 SRPRB Signal recognition particle receptor subunit beta</b> |  |                                   |  |                                |
|              | R.AVLLVGLCDGSK.T [65, 76]                                                                         |  | R.DTQTSITDSCAVYR.V [90, 103]      |  | K.LIQQQLEK.E [191, 198]        |
|              | 616.3394++                                                                                        |  | 808.8647++                        |  | 500.2953++                     |
|              | V [y8] - 835.3978+ (rank 2)                                                                       |  | I [y9] - 1084.5092+ (rank 2)      |  | Q [y6] - 773.4152+ (rank 1)    |
|              | G [y7] - 736.3294+ (rank 1)                                                                       |  | T [y8] - 971.4251+ (rank 1)       |  | Q [y5] - 645.3566+ (rank 2)    |
|              | C [y5] - 566.2239+ (rank 3)                                                                       |  | D [y7] - 870.3774+ (rank 3)       |  | L [y3] - 389.2395+ (rank 4)    |
|              | 620.3465++ (heavy)                                                                                |  | 811.8747++ (heavy)                |  | 504.3024++ (heavy)             |
|              | V [y8] - 843.4120+ (rank 2)                                                                       |  | I [y9] - 1090.5293+ (rank 2)      |  | Q [y6] - 781.4294+ (rank 1)    |
|              | G [y7] - 744.3436+ (rank 1)                                                                       |  | T [y8] - 977.4452+ (rank 1)       |  | Q [y5] - 653.3708+ (rank 2)    |
|              | C [y5] - 574.2381+ (rank 3)                                                                       |  | D [y7] - 876.3976+ (rank 3)       |  | L [y3] - 397.2537+ (rank 4)    |
| <b>RAB35</b> | <b>IPI:IP00300096.4 SWISS-PROT:Q15286 RAB35 Ras-related protein Rab-35</b>                        |  |                                   |  |                                |
|              | R.TITSTYYR.G [71, 78]                                                                             |  | R.WLHEINQNCDDVCR.I [101, 114]     |  | K.VVETEDAYK.F [128, 136]       |
|              | 502.7560++                                                                                        |  | 620.2702+++                       |  | 527.2586++                     |
|              | T [y6] - 790.3730+ (rank 1)                                                                       |  | C [y6] - 824.3025+ (rank 2)       |  | E [y7] - 855.3731+ (rank 1)    |
|              | S [y5] - 689.3253+ (rank 2)                                                                       |  | D [y5] - 664.2719+ (rank 1)       |  | T [y6] - 726.3305+ (rank 3)    |
|              | T [y4] - 602.2933+ (rank 4)                                                                       |  | D [y4] - 549.2450+ (rank 3)       |  | E [y5] - 625.2828+ (rank 2)    |
|              | 505.7661++ (heavy)                                                                                |  | 622.2769+++ (heavy)               |  | 531.2657++ (heavy)             |
|              | T [y6] - 796.3931+ (rank 1)                                                                       |  | C [y6] - 830.3227+ (rank 2)       |  | E [y7] - 863.3873+ (rank 1)    |
|              | S [y5] - 695.3454+ (rank 2)                                                                       |  | D [y5] - 670.2920+ (rank 1)       |  | T [y6] - 734.3447+ (rank 3)    |
|              | T [y4] - 608.3134+ (rank 4)                                                                       |  | D [y4] - 555.2651+ (rank 3)       |  | E [y5] - 633.2970+ (rank 2)    |
|              | K.FAGQMGIQLFETSAK.E [137, 151]                                                                    |  | K.FAGQMGIQLFETSAK.E [137, 151]    |  | K.QQQQQNDVVK.L [178, 188]      |
|              | 814.4111++                                                                                        |  | 822.4085++                        |  | 671.8391++                     |
|              | G [y10] - 1093.5888+ (rank 1)                                                                     |  | G [y10] - 1093.5888+ (rank 2)     |  | Q [y7] - 830.4367+ (rank 2)    |
|              | Q [y8] - 923.4833+ (rank 3)                                                                       |  | Q [y8] - 923.4833+ (rank 1)       |  | Q [y6] - 702.3781+ (rank 1)    |
|              | F [y6] - 682.3406+ (rank 2)                                                                       |  | L [y7] - 795.4247+ (rank 3)       |  | N [y5] - 574.3195+ (rank 3)    |
|              | 818.4182++ (heavy)                                                                                |  | 826.4156++ (heavy)                |  | 675.8462++ (heavy)             |
|              | G [y10] - 1101.6030+ (rank 1)                                                                     |  | G [y10] - 1101.6030+ (rank 2)     |  | Q [y7] - 838.4509+ (rank 2)    |
|              | Q [y8] - 931.4975+ (rank 3)                                                                       |  | Q [y8] - 931.4975+ (rank 1)       |  | Q [y6] - 710.3923+ (rank 1)    |
|              | F [y6] - 690.3548+ (rank 2)                                                                       |  | L [y7] - 803.4389+ (rank 3)       |  | N [y5] - 582.3337+ (rank 3)    |
| <b>RAB3B</b> | <b>IPI:IP00300562.2 SWISS-PROT:P20337 RAB3B Ras-related protein Rab-3B</b>                        |  |                                   |  |                                |
|              | K.DASDQNFDFYMFK.L [12, 23]                                                                        |  | K.GQLLAEQLGFDFFEASAK.E [149, 166] |  | K.MSDSLDTPSMLGSSK.N [186, 201] |
|              | 740.8061++                                                                                        |  | 985.9965++                        |  | 835.8660++                     |
|              | N [y7] - 964.4233+ (rank 1)                                                                       |  | L [y11] - 1231.5994+ (rank 2)     |  | D [y11] - 1137.5092+ (rank 2)  |
|              | F [y6] - 850.3804+ (rank 3)                                                                       |  | G [y10] - 1118.5153+ (rank 1)     |  | T [y10] - 1022.4823+ (rank 3)  |
|              | D [y5] - 703.3120+ (rank 2)                                                                       |  | F [y9] - 1061.4938+ (rank 3)      |  | P [y8] - 806.4077+ (rank 1)    |
|              | 744.8132++ (heavy)                                                                                |  | 990.0036++ (heavy)                |  | 839.8731++ (heavy)             |
|              | N [y7] - 972.4375+ (rank 1)                                                                       |  | L [y11] - 1239.6136+ (rank 2)     |  | D [y11] - 1145.5234+ (rank 2)  |
|              | F [y6] - 858.3946+ (rank 3)                                                                       |  | G [y10] - 1126.5295+ (rank 1)     |  | T [y10] - 1030.4965+ (rank 3)  |
|              | D [y5] - 711.3262+ (rank 2)                                                                       |  | F [y9] - 1069.5080+ (rank 3)      |  | P [y8] - 814.4219+ (rank 1)    |
| <b>RAB30</b> | <b>IPI:IP00302030.2 SWISS-PROT:Q15771 RAB30 Ras-related protein Rab-30</b>                        |  |                                   |  |                                |
|              | K.IVLIGNAGVGK.T [11, 21]                                                                          |  | R.EIEQYASNK.V [105, 113]          |  | K.VITVLVGNK.I [114, 122]       |
|              | 520.8268++                                                                                        |  | 541.2617++                        |  | 471.8028++                     |
|              | L [y9] - 828.4938+ (rank 3)                                                                       |  | Y [y5] - 582.2882+ (rank 2)       |  | T [y7] - 730.4458+ (rank 1)    |
|              | I [y8] - 715.4097+ (rank 4)                                                                       |  | A [y4] - 419.2249+ (rank 1)       |  | L [y5] - 530.3297+ (rank 3)    |
|              | G [y7] - 602.3257+ (rank 1)                                                                       |  | S [y3] - 348.1878+ (rank 3)       |  | V [y4] - 417.2456+ (rank 4)    |
|              | 524.8339++ (heavy)                                                                                |  | 545.2688++ (heavy)                |  | 475.8099++ (heavy)             |
|              | L [y9] - 836.5080+ (rank 3)                                                                       |  | Y [y5] - 590.3024+ (rank 2)       |  | T [y7] - 738.4600+ (rank 1)    |
|              | I [y8] - 723.4239+ (rank 4)                                                                       |  | A [y4] - 427.2391+ (rank 1)       |  | L [y5] - 538.3439+ (rank 3)    |
|              | G [y7] - 610.3398+ (rank 1)                                                                       |  | S [y3] - 356.2020+ (rank 3)       |  | V [y4] - 425.2598+ (rank 4)    |
|              | K.LFLDLACR.L [161, 168]                                                                           |  | R.QNTLVNNSVSSPLPGEK.S [175, 191]  |  |                                |
|              | 504.2708++                                                                                        |  | 877.4576++                        |  |                                |
|              | L [y6] - 747.3818+ (rank 1)                                                                       |  | S [y9] - 871.4520+ (rank 3)       |  |                                |
|              | D [y5] - 634.2977+ (rank 2)                                                                       |  | P [y7] - 697.3879+ (rank 2)       |  |                                |

|                |                                                                                                              |  |                                   |  |  |                                |  |
|----------------|--------------------------------------------------------------------------------------------------------------|--|-----------------------------------|--|--|--------------------------------|--|
|                | L [y4] - 519.2708+ (rank 3)                                                                                  |  | P [y5] - 487.2511+ (rank 1)       |  |  |                                |  |
|                | 507.2808++ (heavy)                                                                                           |  | 881.4647++ (heavy)                |  |  |                                |  |
|                | L [y6] - 753.4019+ (rank 1)                                                                                  |  | S [y9] - 879.4662+ (rank 3)       |  |  |                                |  |
|                | D [y5] - 640.3179+ (rank 2)                                                                                  |  | P [y7] - 705.4021+ (rank 2)       |  |  |                                |  |
|                | L [y4] - 525.2909+ (rank 3)                                                                                  |  | P [y5] - 495.2653+ (rank 1)       |  |  |                                |  |
| <b>RHOF</b>    | <b>IPI: IPI00307458.3   SWISS-PROT: Q9HBH0-1   RHOF Isoform 1 of Rho-related GTP-binding protein RhoF</b>    |  |                                   |  |  |                                |  |
|                | K.IVIVGDGGCGK.T [21, 31]                                                                                     |  | K.YTASVTVGSK.E [55, 64]           |  |  | K.EVTLNLYDTAGQEDYDR.L [65, 81] |  |
|                | 537.7842++                                                                                                   |  | 506.7691++                        |  |  | 1001.4554++                    |  |
|                | I [y9] - 862.4087+ (rank 4)                                                                                  |  | A [y8] - 748.4199+ (rank 1)       |  |  | Y [y11] - 1332.5339+ (rank 2)  |  |
|                | V [y8] - 749.3247+ (rank 3)                                                                                  |  | S [y7] - 677.3828+ (rank 2)       |  |  | D [y10] - 1169.4705+ (rank 3)  |  |
|                | G [y7] - 650.2563+ (rank 2)                                                                                  |  | T [y5] - 491.2824+ (rank 3)       |  |  | G [y7] - 882.3588+ (rank 1)    |  |
|                | 541.7913++ (heavy)                                                                                           |  | 510.7762++ (heavy)                |  |  | 1004.4655++ (heavy)            |  |
|                | I [y9] - 870.4229+ (rank 4)                                                                                  |  | A [y8] - 756.4341+ (rank 1)       |  |  | Y [y11] - 1338.5540+ (rank 2)  |  |
|                | V [y8] - 757.3389+ (rank 3)                                                                                  |  | S [y7] - 685.3970+ (rank 2)       |  |  | D [y10] - 1175.4907+ (rank 3)  |  |
|                | G [y7] - 658.2704+ (rank 2)                                                                                  |  | T [y5] - 499.2966+ (rank 3)       |  |  | G [y7] - 888.3789+ (rank 1)    |  |
|                | K.WFPEVTHFCR.G [112, 121]                                                                                    |  | R.AALYLECSAK.F [166, 175]         |  |  |                                |  |
|                | 689.8217++                                                                                                   |  | 563.2841++                        |  |  |                                |  |
|                | P [y8] - 1045.4884+ (rank 1)                                                                                 |  | Y [y7] - 870.4026+ (rank 2)       |  |  |                                |  |
|                | V [y6] - 819.3930+ (rank 2)                                                                                  |  | L [y6] - 707.3393+ (rank 1)       |  |  |                                |  |
|                | T [y5] - 720.3246+ (rank 3)                                                                                  |  | E [y5] - 594.2552+ (rank 3)       |  |  |                                |  |
|                | 692.8318++ (heavy)                                                                                           |  | 567.2912++ (heavy)                |  |  |                                |  |
|                | P [y8] - 1051.5085+ (rank 1)                                                                                 |  | Y [y7] - 878.4168+ (rank 2)       |  |  |                                |  |
|                | V [y6] - 825.4131+ (rank 2)                                                                                  |  | L [y6] - 715.3535+ (rank 1)       |  |  |                                |  |
|                | T [y5] - 726.3447+ (rank 3)                                                                                  |  | E [y5] - 602.2694+ (rank 3)       |  |  |                                |  |
| <b>RAB34</b>   | <b>IPI: IPI00328180.4   SWISS-PROT: Q9BZG1-1   RAB34 Isoform 1 of Ras-related protein Rab-34</b>             |  |                                   |  |  |                                |  |
|                | K.VIVVGDLSVKG.T [54, 64]                                                                                     |  | R.FEVLGIPFSLQLWDTAGQER.F [93, 11] |  |  | K.ENDPSSVLLFLVGSK.K [152, 166] |  |
|                | 543.3319++                                                                                                   |  | 1153.5944++                       |  |  | 802.9301++                     |  |
|                | V [y9] - 873.5040+ (rank 1)                                                                                  |  | Q [y10] - 1203.5753+ (rank 5)     |  |  | L [y8] - 876.5553+ (rank 1)    |  |
|                | V [y8] - 774.4356+ (rank 2)                                                                                  |  | L [y9] - 1075.5167+ (rank 4)      |  |  | L [y7] - 763.4713+ (rank 2)    |  |
|                | G [y7] - 675.3672+ (rank 3)                                                                                  |  | W [y8] - 962.4326+ (rank 1)       |  |  | F [y6] - 650.3872+ (rank 3)    |  |
|                | 547.3390++ (heavy)                                                                                           |  | 1156.6045++ (heavy)               |  |  | 806.9372++ (heavy)             |  |
|                | V [y9] - 881.5182+ (rank 1)                                                                                  |  | Q [y10] - 1209.5954+ (rank 5)     |  |  | L [y8] - 884.5695+ (rank 1)    |  |
|                | V [y8] - 782.4498+ (rank 2)                                                                                  |  | L [y9] - 1081.5368+ (rank 4)      |  |  | L [y7] - 771.4855+ (rank 2)    |  |
|                | G [y7] - 683.3814+ (rank 3)                                                                                  |  | W [y8] - 968.4528+ (rank 1)       |  |  | F [y6] - 658.4014+ (rank 3)    |  |
|                | K.AEYWAVSSLTGENVR.E [191, 205]                                                                               |  | R.INSDDSNLYLTASK.K [238, 251]     |  |  |                                |  |
|                | 841.4127++                                                                                                   |  | 770.8781++                        |  |  |                                |  |
|                | S [y9] - 962.4901+ (rank 3)                                                                                  |  | Y [y6] - 682.3770+ (rank 3)       |  |  |                                |  |
|                | T [y6] - 675.3420+ (rank 2)                                                                                  |  | L [y5] - 519.3137+ (rank 4)       |  |  |                                |  |
|                | G [y5] - 574.2944+ (rank 1)                                                                                  |  | T [y4] - 406.2296+ (rank 2)       |  |  |                                |  |
|                | 844.4227++ (heavy)                                                                                           |  | 774.8852++ (heavy)                |  |  |                                |  |
|                | S [y9] - 968.5103+ (rank 3)                                                                                  |  | Y [y6] - 690.3912+ (rank 3)       |  |  |                                |  |
|                | T [y6] - 681.3622+ (rank 2)                                                                                  |  | L [y5] - 527.3279+ (rank 4)       |  |  |                                |  |
|                | G [y5] - 580.3145+ (rank 1)                                                                                  |  | T [y4] - 414.2438+ (rank 2)       |  |  |                                |  |
| <b>RAB43</b>   | <b>IPI: IPI00329441.1   SWISS-PROT: Q86YS6   RAB43; ISY1 Ras-related protein Rab-43</b>                      |  |                                   |  |  |                                |  |
|                | K.YAGSNIVQLLIGNK.S [118, 131]                                                                                |  | K.DSSNVEEAFLR.V [164, 174]        |  |  | K.SPDHIQLNSK.D [192, 201]      |  |
|                | 745.4223++                                                                                                   |  | 633.8017++                        |  |  | 569.7962++                     |  |
|                | V [y8] - 884.5564+ (rank 1)                                                                                  |  | E [y6] - 764.3937+ (rank 1)       |  |  | D [y8] - 954.5003+ (rank 5)    |  |
|                | Q [y7] - 785.4880+ (rank 2)                                                                                  |  | A [y4] - 506.3085+ (rank 3)       |  |  | H [y7] - 839.4734+ (rank 1)    |  |
|                | I [y4] - 431.2613+ (rank 3)                                                                                  |  | F [y3] - 435.2714+ (rank 2)       |  |  | I [y6] - 702.4145+ (rank 2)    |  |
|                | 749.4294++ (heavy)                                                                                           |  | 636.8117++ (heavy)                |  |  | 573.8033++ (heavy)             |  |
|                | V [y8] - 892.5706+ (rank 1)                                                                                  |  | E [y6] - 770.4139+ (rank 1)       |  |  | D [y8] - 962.5145+ (rank 5)    |  |
|                | Q [y7] - 793.5022+ (rank 2)                                                                                  |  | A [y4] - 512.3287+ (rank 3)       |  |  | H [y7] - 847.4876+ (rank 1)    |  |
|                | I [y4] - 439.2755+ (rank 3)                                                                                  |  | F [y3] - 441.2916+ (rank 2)       |  |  | I [y6] - 710.4287+ (rank 2)    |  |
|                | R.VATELIMR.H [175, 182]                                                                                      |  |                                   |  |  | 380.1999+++                    |  |
|                | 466.7653++                                                                                                   |  |                                   |  |  | P [y9] - 1051.5531+ (rank 2)   |  |
|                | T [y6] - 762.4178+ (rank 1)                                                                                  |  |                                   |  |  | I [y6] - 702.4145+ (rank 4)    |  |
|                | L [y4] - 532.3276+ (rank 2)                                                                                  |  |                                   |  |  | Q [y5] - 589.3304+ (rank 5)    |  |
|                | I [y3] - 419.2435+ (rank 3)                                                                                  |  |                                   |  |  | 382.8713+++ (heavy)            |  |
|                | 469.7754++ (heavy)                                                                                           |  |                                   |  |  | P [y9] - 1059.5673+ (rank 2)   |  |
|                | T [y6] - 768.4380+ (rank 1)                                                                                  |  |                                   |  |  | I [y6] - 710.4287+ (rank 4)    |  |
|                | L [y4] - 538.3477+ (rank 2)                                                                                  |  |                                   |  |  | Q [y5] - 597.3446+ (rank 5)    |  |
|                | I [y3] - 425.2636+ (rank 3)                                                                                  |  |                                   |  |  |                                |  |
| <b>NKIRAS1</b> | <b>IPI: IPI00410705.2   SWISS-PROT: Q9NYS0   NKIRAS1 NF-kappa-B inhibitor-interacting Ras-like protein 1</b> |  |                                   |  |  |                                |  |
|                | K.VVVCGLLSVKG.T [6, 16]                                                                                      |  | R.QVDAEVAQQWAK.S [128, 139]       |  |  | K.TLIEPFTLLASK.L [155, 166]    |  |
|                | 565.8337++                                                                                                   |  | 686.8464++                        |  |  | 666.8923++                     |  |
|                | V [y9] - 932.5234+ (rank 1)                                                                                  |  | V [y7] - 830.4519+ (rank 2)       |  |  | I [y10] - 1118.6456+ (rank 2)  |  |
|                | C [y8] - 833.4550+ (rank 2)                                                                                  |  | A [y6] - 731.3835+ (rank 1)       |  |  | E [y9] - 1005.5615+ (rank 3)   |  |
|                | S [y4] - 390.2347+ (rank 3)                                                                                  |  | Q [y5] - 660.3464+ (rank 3)       |  |  | P [y8] - 876.5189+ (rank 1)    |  |
|                | 569.8408++ (heavy)                                                                                           |  | 690.8535++ (heavy)                |  |  | 670.8994++ (heavy)             |  |
|                | V [y9] - 940.5376+ (rank 1)                                                                                  |  | V [y7] - 838.4661+ (rank 2)       |  |  | I [y10] - 1126.6598+ (rank 2)  |  |
|                | C [y8] - 841.4691+ (rank 2)                                                                                  |  | A [y6] - 739.3977+ (rank 1)       |  |  | E [y9] - 1013.5757+ (rank 3)   |  |
|                | S [y4] - 398.2489+ (rank 3)                                                                                  |  | Q [y5] - 668.3606+ (rank 3)       |  |  | P [y8] - 884.5331+ (rank 1)    |  |
| <b>RAB12</b>   | <b>IPI: IPI00419932.5   SWISS-PROT: Q6IQ22   RAB12 Ras-related protein Rab-12</b>                            |  |                                   |  |  |                                |  |
|                | R.AGGGGGLGAGSPALSGGQGR.R [10,                                                                                |  | K.LQVLIIGSR.G [42, 50]            |  |  | R.FTDDTFCEACK.S [61, 71]       |  |
|                | 792.3979++                                                                                                   |  | 499.8215++                        |  |  | 697.2736++                     |  |
|                | G [y13] - 1114.5600+ (rank 3)                                                                                |  | V [y7] - 757.4930+ (rank 1)       |  |  | D [y9] - 1145.4238+ (rank 1)   |  |
|                | G [y11] - 986.5014+ (rank 2)                                                                                 |  | I [y6] - 658.4246+ (rank 2)       |  |  | F [y6] - 814.3222+ (rank 3)    |  |

|               |                                                                                                            |                                      |                                    |
|---------------|------------------------------------------------------------------------------------------------------------|--------------------------------------|------------------------------------|
|               | P [y9] - 842.4479+ (rank 1)                                                                                | I [y5] - 545.3406+ (rank 3)          | C [y5] - 667.2538+ (rank 2)        |
|               | 795.4079++ (heavy)                                                                                         | 502.8315++ (heavy)                   | 701.2807++ (heavy)                 |
|               | G [y13] - 1120.5801+ (rank 3)                                                                              | V [y7] - 763.5132+ (rank 1)          | D [y9] - 1153.4380+ (rank 1)       |
|               | G [y11] - 992.5215+ (rank 2)                                                                               | I [y6] - 664.4448+ (rank 2)          | F [y6] - 822.3364+ (rank 3)        |
|               | P [y9] - 848.4680+ (rank 1)                                                                                | I [y5] - 551.3607+ (rank 3)          | C [y5] - 675.2680+ (rank 2)        |
|               | R.FNSITSAYR.S [103, 112]                                                                                   | K.FAQQITGMR.F [172, 180]             |                                    |
|               | 611.2986++                                                                                                 | 526.2713++                           |                                    |
|               | S [y8] - 960.4785+ (rank 2)                                                                                | Q [y6] - 705.3712+ (rank 1)          |                                    |
|               | T [y6] - 760.3624+ (rank 1)                                                                                | I [y5] - 577.3126+ (rank 3)          |                                    |
|               | S [y5] - 659.3148+ (rank 3)                                                                                | T [y4] - 464.2286+ (rank 2)          |                                    |
|               | 614.3086++ (heavy)                                                                                         | 529.2814++ (heavy)                   |                                    |
|               | S [y8] - 966.4987+ (rank 2)                                                                                | Q [y6] - 711.3913+ (rank 1)          |                                    |
|               | T [y6] - 766.3826+ (rank 1)                                                                                | I [y5] - 583.3328+ (rank 3)          |                                    |
|               | S [y5] - 665.3349+ (rank 3)                                                                                | T [y4] - 470.2487+ (rank 2)          |                                    |
| <b>KRAS</b>   | <b>IPI:IP100423568.1 SWISS-PROT:P01116-1 KRAS Isoform 2A of GTPase KRas</b>                                |                                      |                                    |
|               | K.DSEDVPMVLVGNK.C [104, 116]                                                                               | R.QRVEDAFYTLVR.E [149, 160] (missed) | R.VEDAFYTLVR.E [151, 160]          |
|               | 701.8478++                                                                                                 | 499.6001+++                          | 606.8166++                         |
|               | P [y8] - 857.4913+ (rank 1)                                                                                | Y [y5] - 651.3824+ (rank 2)          | D [y8] - 984.5149+ (rank 1)        |
|               | V [y4] - 417.2456+ (rank 3)                                                                                | T [y4] - 488.3191+ (rank 1)          | A [y7] - 869.4880+ (rank 2)        |
|               | G [y3] - 318.1772+ (rank 4)                                                                                | L [y3] - 387.2714+ (rank 4)          | F [y6] - 798.4509+ (rank 3)        |
|               | 705.8549++ (heavy)                                                                                         | 503.6135+++ (heavy)                  | 609.8267++ (heavy)                 |
|               | P [y8] - 865.5055+ (rank 1)                                                                                | Y [y5] - 657.4026+ (rank 2)          | D [y8] - 990.5350+ (rank 1)        |
|               | V [y4] - 425.2598+ (rank 3)                                                                                | T [y4] - 494.3392+ (rank 1)          | A [y7] - 875.5081+ (rank 2)        |
|               | G [y3] - 326.1914+ (rank 4)                                                                                | L [y3] - 393.2916+ (rank 4)          | F [y6] - 804.4710+ (rank 3)        |
| <b>KRAS</b>   | <b>IPI:IP100423570.3 SWISS-PROT:P01116-2 KRAS Isoform 2B of GTPase KRas</b>                                |                                      |                                    |
|               | R.SYGIPFIETSAK.T [135, 146]                                                                                | K.TRQGVDDAFYTLVR.E [147, 160] (miss) | R.QGVDDAFYTLVR.E [149, 160]        |
|               | 656.8428++                                                                                                 | 547.6179+++                          | 692.3488++                         |
|               | P [y8] - 892.4775+ (rank 1)                                                                                | F [y6] - 798.4509+ (rank 4)          | A [y7] - 869.4880+ (rank 3)        |
|               | F [y7] - 795.4247+ (rank 4)                                                                                | Y [y5] - 651.3824+ (rank 1)          | F [y6] - 798.4509+ (rank 2)        |
|               | I [y6] - 648.3563+ (rank 3)                                                                                | T [y4] - 488.3191+ (rank 3)          | Y [y5] - 651.3824+ (rank 1)        |
|               | 660.8499++ (heavy)                                                                                         | 551.6313+++ (heavy)                  | 695.3589++ (heavy)                 |
|               | P [y8] - 900.4917+ (rank 1)                                                                                | F [y6] - 804.4710+ (rank 4)          | A [y7] - 875.5081+ (rank 3)        |
|               | F [y7] - 803.4389+ (rank 4)                                                                                | Y [y5] - 657.4026+ (rank 1)          | F [y6] - 804.4710+ (rank 2)        |
|               | I [y6] - 656.3705+ (rank 3)                                                                                | T [y4] - 494.3392+ (rank 3)          | Y [y5] - 657.4026+ (rank 1)        |
| <b>RAB11A</b> | <b>IPI:IP100429190.4 TREMBL:B4DMN1 RAB11A cDNA FLJ61136, highly similar to Ras-related protein Rab-11A</b> |                                      |                                    |
|               | K.NGLSFIETSAALDSTNVEAAFQILTILTEIYR.I [190, 218]                                                            |                                      |                                    |
|               | 1068.5417+++                                                                                               |                                      |                                    |
|               | L [y6] - 794.4407+ (rank 1)                                                                                |                                      |                                    |
|               | T [y5] - 681.3566+ (rank 2)                                                                                |                                      |                                    |
|               | E [y4] - 580.3089+ (rank 3)                                                                                |                                      |                                    |
|               | 1070.5484+++ (heavy)                                                                                       |                                      |                                    |
|               | L [y6] - 800.4608+ (rank 1)                                                                                |                                      |                                    |
|               | T [y5] - 687.3767+ (rank 2)                                                                                |                                      |                                    |
|               | E [y4] - 586.3291+ (rank 3)                                                                                |                                      |                                    |
| <b>RHOT2</b>  | <b>IPI:IP100465059.4 SWISS-PROT:Q8IX11-1 RHOT2 Isoform 1 of Mitochondrial Rho GTPase 2</b>                 |                                      |                                    |
|               | K.WIPLVNGGTTQGP.R.V [96, 109]                                                                              | K.SAFLQAFLGR.G [429, 438]            | K.ADLPEGVAVSGPSPAEFGR.K [525, 543] |
|               | 748.4044++                                                                                                 | 555.3087++                           | 979.9675++                         |
|               | P [y12] - 1196.6382+ (rank 1)                                                                              | Q [y6] - 691.3886+ (rank 1)          | S [y10] - 1107.4888+ (rank 1)      |
|               | N [y9] - 887.4330+ (rank 2)                                                                                | A [y5] - 563.3300+ (rank 2)          | G [y9] - 1020.4567+ (rank 2)       |
|               | G [y8] - 773.3900+ (rank 3)                                                                                | F [y4] - 492.2929+ (rank 3)          | P [y8] - 963.4353+ (rank 4)        |
|               | 751.4145++ (heavy)                                                                                         | 558.3188++ (heavy)                   | 982.9775++ (heavy)                 |
|               | P [y12] - 1202.6583+ (rank 1)                                                                              | Q [y6] - 697.4087+ (rank 1)          | S [y10] - 1113.5089+ (rank 1)      |
|               | N [y9] - 893.4531+ (rank 2)                                                                                | A [y5] - 569.3501+ (rank 2)          | G [y9] - 1026.4769+ (rank 2)       |
|               | G [y8] - 779.4102+ (rank 3)                                                                                | F [y4] - 498.3130+ (rank 3)          | P [y8] - 969.4554+ (rank 4)        |
| <b>RAB19</b>  | <b>IPI:IP100478209.6 SWISS-PROT:A4D1S5-1 RAB19 Isoform 1 of Ras-related protein Rab-19</b>                 |                                      |                                    |
|               | R.AADENFDYLFK.I [76, 86]                                                                                   | K.IILIGDSNVGK.T [87, 97]             | K.MQVWDTAGQER.F [135, 145]         |
|               | 666.8090++                                                                                                 | 564.8348++                           | 660.8037++                         |
|               | N [y7] - 946.4669+ (rank 3)                                                                                | L [y9] - 902.4942+ (rank 2)          | V [y9] - 1061.5010+ (rank 2)       |
|               | D [y5] - 685.3556+ (rank 4)                                                                                | I [y8] - 789.4101+ (rank 3)          | W [y8] - 962.4326+ (rank 1)        |
|               | Y [y4] - 570.3286+ (rank 5)                                                                                | G [y7] - 676.3260+ (rank 1)          | D [y7] - 776.3533+ (rank 3)        |
|               | 670.8161++ (heavy)                                                                                         | 568.8419++ (heavy)                   | 663.8138++ (heavy)                 |
|               | N [y7] - 954.4811+ (rank 3)                                                                                | L [y9] - 910.5084+ (rank 2)          | V [y9] - 1067.5212+ (rank 2)       |
|               | D [y5] - 693.3698+ (rank 4)                                                                                | I [y8] - 797.4243+ (rank 3)          | W [y8] - 968.4528+ (rank 1)        |
|               | Y [y4] - 578.3428+ (rank 5)                                                                                | G [y7] - 684.3402+ (rank 1)          | D [y7] - 782.3735+ (rank 3)        |
|               | R.SAHAALAYDLTR.R [156, 168]                                                                                | R.HVLFEDACTLAEK.Y [205, 217]         |                                    |
|               | 467.9210+++                                                                                                | 511.5853+++                          |                                    |
|               | Y [y5] - 667.3410+ (rank 4)                                                                                | C [y6] - 721.3549+ (rank 4)          |                                    |
|               | D [y4] - 504.2776+ (rank 2)                                                                                | T [y5] - 561.3243+ (rank 3)          |                                    |
|               | L [y3] - 389.2507+ (rank 3)                                                                                | A [y3] - 347.1925+ (rank 2)          |                                    |
|               | 469.9277+++ (heavy)                                                                                        | 514.2567+++ (heavy)                  |                                    |
|               | Y [y5] - 673.3611+ (rank 4)                                                                                | C [y6] - 729.3691+ (rank 4)          |                                    |
|               | D [y4] - 510.2978+ (rank 2)                                                                                | T [y5] - 569.3385+ (rank 3)          |                                    |
|               | L [y3] - 395.2708+ (rank 3)                                                                                | A [y3] - 355.2067+ (rank 2)          |                                    |
| <b>RHOA</b>   | <b>IPI:IP100478231.2 SWISS-PROT:P61586 RHOA Transforming protein RhoA</b>                                  |                                      |                                    |
|               | K.QEPVKPEEGR.D [135, 144]                                                                                  | R.IGAFGYMECSAK.T [150, 161]          | R.IGAFGYMECSAK.T [150, 161]        |
|               | 584.8015++                                                                                                 | 667.2994++                           | 675.2969++                         |
|               | P [y8] - 911.4945+ (rank 1)                                                                                | G [y8] - 945.3805+ (rank 1)          | G [y8] - 961.3754+ (rank 1)        |



|                    |                                                                                                             |  |                                       |  |                                 |
|--------------------|-------------------------------------------------------------------------------------------------------------|--|---------------------------------------|--|---------------------------------|
|                    | K [y6] - 715.3733+ (rank 4)                                                                                 |  | Y [y7] - 888.3590+ (rank 3)           |  | Y [y7] - 904.3539+ (rank 2)     |
|                    | E [y3] - 361.1830+ (rank 3)                                                                                 |  | M [y6] - 725.2957+ (rank 2)           |  | M [y6] - 741.2906+ (rank 3)     |
|                    | 591.8186++ (heavy)                                                                                          |  | 671.3065++ (heavy)                    |  | 679.3040++ (heavy)              |
|                    | P [y8] - 925.5288+ (rank 1)                                                                                 |  | G [y8] - 953.3947+ (rank 1)           |  | G [y8] - 969.3896+ (rank 1)     |
|                    | K [y6] - 729.4077+ (rank 4)                                                                                 |  | Y [y7] - 896.3732+ (rank 3)           |  | Y [y7] - 912.3681+ (rank 2)     |
|                    | E [y3] - 367.2031+ (rank 3)                                                                                 |  | M [y6] - 733.3099+ (rank 2)           |  | M [y6] - 749.3048+ (rank 3)     |
| <b>RAB4A</b>       | <b>IPI:IP100480056.8 SWISS-PROT:P20338 RAB4A RAB4A, member RAS oncogene family variant</b>                  |  |                                       |  |                                 |
|                    | K.FLVIGNAGTGK.S [15, 25]                                                                                    |  | K.IESGELDPER.M [177, 186]             |  | R.MGSGIQYGDAAALR.Q [187, 199]   |
|                    | 538.8086++                                                                                                  |  | 572.7777++                            |  | 669.8272++                      |
|                    | V [y9] - 816.4574+ (rank 2)                                                                                 |  | S [y8] - 902.4214+ (rank 1)           |  | Q [y8] - 893.4476+ (rank 1)     |
|                    | I [y8] - 717.3890+ (rank 1)                                                                                 |  | D [y4] - 516.2413+ (rank 2)           |  | Y [y7] - 765.3890+ (rank 2)     |
|                    | G [y7] - 604.3049+ (rank 3)                                                                                 |  | P [y3] - 401.2143+ (rank 3)           |  | G [y6] - 602.3257+ (rank 3)     |
|                    | 542.8157++ (heavy)                                                                                          |  | E [y9] - 516.2356++ (rank 2)          |  | 672.8372++ (heavy)              |
|                    | V [y9] - 824.4716+ (rank 2)                                                                                 |  | 575.7877++ (heavy)                    |  | Q [y8] - 899.4677+ (rank 1)     |
|                    | I [y8] - 725.4032+ (rank 1)                                                                                 |  | S [y8] - 908.4415+ (rank 1)           |  | Y [y7] - 771.4091+ (rank 2)     |
|                    | G [y7] - 612.3191+ (rank 3)                                                                                 |  | D [y4] - 522.2614+ (rank 2)           |  | G [y6] - 608.3458+ (rank 3)     |
|                    |                                                                                                             |  | P [y3] - 407.2344+ (rank 3)           |  |                                 |
|                    |                                                                                                             |  | E [y9] - 519.2457++ (rank 2)          |  |                                 |
| <b>RAN</b>         | <b>IPI:IP100643041.3 SWISS-PROT:P62826 RANP1;RAN GTP-binding nuclear protein Ran</b>                        |  |                                       |  |                                 |
|                    | K.FNVWDTAGQEK.F [60, 70]                                                                                    |  | R.VCENIPIVLCGNK.V [110, 122]          |  | K.NLQYYDISAK.S [142, 151]       |
|                    | 647.8068++                                                                                                  |  | 758.3865++                            |  | 607.8062++                      |
|                    | V [y9] - 1033.4949+ (rank 3)                                                                                |  | P [y8] - 900.4971+ (rank 1)           |  | Q [y8] - 987.4782+ (rank 1)     |
|                    | W [y8] - 934.4265+ (rank 1)                                                                                 |  | V [y6] - 690.3603+ (rank 3)           |  | Y [y7] - 859.4196+ (rank 2)     |
|                    | D [y7] - 748.3472+ (rank 2)                                                                                 |  | L [y5] - 591.2919+ (rank 2)           |  | Y [y6] - 696.3563+ (rank 3)     |
|                    | 651.8139++ (heavy)                                                                                          |  | 762.3936++ (heavy)                    |  | 611.8133++ (heavy)              |
|                    | V [y9] - 1041.5091+ (rank 3)                                                                                |  | P [y8] - 908.5113+ (rank 1)           |  | Q [y8] - 995.4924+ (rank 1)     |
|                    | W [y8] - 942.4407+ (rank 1)                                                                                 |  | V [y6] - 698.3745+ (rank 3)           |  | Y [y7] - 867.4338+ (rank 2)     |
|                    | D [y7] - 756.3614+ (rank 2)                                                                                 |  | L [y5] - 599.3061+ (rank 2)           |  | Y [y6] - 704.3705+ (rank 3)     |
| <b>RAB34</b>       | <b>IPI:IP100788998.3 TREMBL:B4DNC0 RAB34 ras-related protein Rab-34 isoform 2</b>                           |  |                                       |  |                                 |
|                    | -MSHLPGLELR.R [0, 9]                                                                                        |  | R.VLAELPQCLR.K [68, 77]               |  |                                 |
|                    | 390.2096+++                                                                                                 |  | 599.8343++                            |  |                                 |
|                    | L [y4] - 530.3297+ (rank 1)                                                                                 |  | A [y8] - 986.5088+ (rank 2)           |  |                                 |
|                    | E [y3] - 417.2456+ (rank 3)                                                                                 |  | L [y6] - 786.4291+ (rank 3)           |  |                                 |
|                    | L [y2] - 288.2030+ (rank 2)                                                                                 |  | P [y5] - 673.3450+ (rank 1)           |  |                                 |
|                    | 392.2163+++ (heavy)                                                                                         |  | 602.8443++ (heavy)                    |  |                                 |
|                    | L [y4] - 536.3498+ (rank 1)                                                                                 |  | A [y8] - 992.5289+ (rank 2)           |  |                                 |
|                    | E [y3] - 423.2657+ (rank 3)                                                                                 |  | L [y6] - 792.4492+ (rank 3)           |  |                                 |
|                    | L [y2] - 294.2231+ (rank 2)                                                                                 |  | P [y5] - 679.3651+ (rank 1)           |  |                                 |
| <b>RAB11A</b>      | <b>IPI:IP100795676.1 VEGA:OTTHUMP00000175895 RAB11A 22 kDa protein</b>                                      |  |                                       |  |                                 |
|                    | R.ENDMSPSNVPIHVPPTTENKPK.V [167, 190]                                                                       |  | R.ENDMSPSNVPIHVPPTTENKPK.V [167, 190] |  |                                 |
|                    | 882.1060+++                                                                                                 |  | 887.4377+++                           |  |                                 |
|                    | H [y11] - 1247.6743+ (rank 4)                                                                               |  | P [y13] - 1457.8111+ (rank 3)         |  |                                 |
|                    | P [y9] - 1011.5469+ (rank 1)                                                                                |  | P [y9] - 1011.5469+ (rank 1)          |  |                                 |
|                    | T [y7] - 817.4414+ (rank 2)                                                                                 |  | E [y5] - 615.3461+ (rank 2)           |  |                                 |
|                    | 887.4488+++ (heavy)                                                                                         |  | 892.7805+++ (heavy)                   |  |                                 |
|                    | H [y11] - 1263.7027+ (rank 4)                                                                               |  | P [y13] - 1473.8395+ (rank 3)         |  |                                 |
|                    | P [y9] - 1027.5753+ (rank 1)                                                                                |  | P [y9] - 1027.5753+ (rank 1)          |  |                                 |
|                    | T [y7] - 833.4698+ (rank 2)                                                                                 |  | E [y5] - 631.3744+ (rank 2)           |  |                                 |
| <b>RABL4/IFT27</b> | <b>IPI:IP100872292.1 SWISS-PROT:Q9BW83-1 IFT27 Isoform 1 of Intraflagellar transport protein 27 homolog</b> |  |                                       |  |                                 |
|                    | K.CILAGDPAVVGK.T [7, 17]                                                                                    |  | K.TALAQIFR.S [18, 25]                 |  | R.SQAPGISLPGVLVGNK.T [108, 123] |
|                    | 550.7921++                                                                                                  |  | 460.2716++                            |  | 768.9408++                      |
|                    | L [y9] - 827.4621+ (rank 1)                                                                                 |  | L [y6] - 747.4512+ (rank 1)           |  | P [y13] - 1250.7467+ (rank 3)   |
|                    | A [y8] - 714.3781+ (rank 3)                                                                                 |  | A [y5] - 634.3671+ (rank 2)           |  | S [y10] - 983.5884+ (rank 2)    |
|                    | G [y7] - 643.3410+ (rank 2)                                                                                 |  | Q [y4] - 563.3300+ (rank 3)           |  | P [y8] - 783.4723+ (rank 1)     |
|                    | 554.7992++ (heavy)                                                                                          |  | 463.2817++ (heavy)                    |  | 772.9479++ (heavy)              |
|                    | L [y9] - 835.4763+ (rank 1)                                                                                 |  | L [y6] - 753.4713+ (rank 1)           |  | P [y13] - 1258.7609+ (rank 3)   |
|                    | A [y8] - 722.3923+ (rank 3)                                                                                 |  | A [y5] - 640.3873+ (rank 2)           |  | S [y10] - 991.6026+ (rank 2)    |
|                    | G [y7] - 651.3552+ (rank 2)                                                                                 |  | Q [y4] - 569.3501+ (rank 3)           |  | P [y8] - 791.4865+ (rank 1)     |

**Table S3B.** A complete list of quantified small GTPase peptides and proteins in three sets of SILAC experiments for WM, IGR and WMLu paired melanoma cell lines.

|               |                                     |                         | $R_{WM115/WM266}$ |        |       | WM, Mean | WM, S.D. |
|---------------|-------------------------------------|-------------------------|-------------------|--------|-------|----------|----------|
|               |                                     |                         | WM, F1            | WM, F2 | WM, R |          |          |
| <b>NRAS</b>   |                                     | NRAS protein ratio      |                   |        |       | 0.64     | 0.04     |
|               | R.TGEGFLCVFAINNSK.S [73, 87]        | NRAS peptide ratio, 1   | 0.68              | 0.67   | 0.57  | 0.64     | 0.05     |
|               | K.SFADINLYR.E [88, 96]              | NRAS peptide ratio, 2   | 0.68              | 0.68   | 0.58  | 0.64     | 0.04     |
|               | R.QGVEDAFYTLVR.E [149, 160]         | NRAS peptide ratio, 3   | 0.76              | 0.74   | 0.67  | 0.72     | 0.04     |
| <b>HRAS</b>   |                                     | HRAS protein ratio      |                   |        |       | 1.20     | 0.03     |
|               | R.TGEGFLCVFAINNTK.S [73, 87]        | HRAS peptide ratio, 1   | 1.14              | 1.21   | 1.12  | 1.16     | 0.04     |
|               | K.SFEDIHQYR.E [88, 96]              | HRAS peptide ratio, 2   | 1.36              | 1.38   | 0.99  | 1.21     | 0.18     |
|               | R.SYGIPYIETSAK.T [135, 146]         | HRAS peptide ratio, 3   | 1.25              | 1.25   | 1.17  | 1.22     | 0.04     |
| <b>RHOB</b>   |                                     | RHOB protein ratio      |                   |        |       | 2.13     | 0.00     |
|               | K.LVVVGDGACGK.T [7, 17]             | RHOB peptide ratio, 1   | 2.43              | 3.09   | 1.48  | 2.13     | 0.66     |
|               | K.DEFPEVYVPTVFENYVADIEVDGK.         | RHOB peptide ratio, 2   | ND                | ND     | ND    | ND       | ND       |
|               | R.IQAYDYLCQSAK.T [150, 161]         | RHOB peptide ratio, 3   | ND                | ND     | ND    | ND       | ND       |
|               | R.EVFETATRA.A [168, 175]            | RHOB peptide ratio, 4   | ND                | ND     | ND    | ND       | ND       |
| <b>RND3</b>   |                                     | RND3 protein ratio      |                   |        |       | 0.44     | 0.04     |
|               | K.IVVVGDSDQCGK.T [25, 35]           | RND3 peptide ratio, 1   | 0.40              | 0.43   | 0.45  | 0.42     | 0.02     |
|               | K.TALLHVFAK.D [36, 44]              | RND3 peptide ratio, 2   | 0.58              | 0.54   | 0.43  | 0.51     | 0.06     |
|               | K.GEIQEFQCPNTK.M [118, 128]         | RND3 peptide ratio, 3   | 0.41              | 0.41   | 0.61  | 0.46     | 0.10     |
|               | R.TDVSTLVLSNHR.Q [140, 152]         | RND3 peptide ratio, 4   | 0.81              | 0.57   | 0.53  | 0.62     | 0.12     |
|               | R.DIFHVATLACVVK.T [187, 199]        | RND3 peptide ratio, 5   | ND                | ND     | ND    | ND       | ND       |
| <b>RAB39</b>  |                                     | RAB39 protein ratio     |                   |        |       | 0.84     | 0.00     |
|               | R.LIVIGDSTVVK.S [10, 20]            | RAB39 peptide ratio, 1  | 1.14              | 1.22   | 0.85  | 1.05     | 0.16     |
|               | R.IKLQLWDTAGQER.F [61, 73] (missed) | RAB39 peptide ratio, 2  | 1.14              | 1.22   | 0.85  | 1.05     | 0.16     |
|               | K.LQLWDTAGQER.F [63, 73]            | RAB39 peptide ratio, 3  | 0.94              | 1.05   | 1.14  | 1.04     | 0.08     |
| <b>ARL5A</b>  |                                     | ARL5A protein ratio     |                   |        |       | 1.32     | 0.43     |
|               | R.FLMWDIGGQESLR.S [24, 36]          | ARL5A peptide ratio, 1  | ND                | ND     | ND    | ND       | ND       |
|               | K.MLAHEDLR.K [71, 78]               | ARL5A peptide ratio, 2  | 3.28              | 4.12   | 0.31  | 0.78     | 1.64     |
|               | K.AGLLIFANK.Q [80, 88]              | ARL5A peptide ratio, 3  | 3.99              | 3.85   | 0.77  | 1.65     | 1.49     |
| <b>SAR1B</b>  |                                     | SAR1B protein ratio     |                   |        |       | 0.84     | 0.22     |
|               | K.IDRPEAISEER.L [135, 145]          | SAR1B peptide ratio, 1  | 0.68              | 0.76   | 0.91  | 0.77     | 0.09     |
|               | R.EMFGLYGQTTGK.G [148, 159]         | SAR1B peptide ratio, 2  | 2.05              | 0.88   | 0.99  | 1.14     | 0.53     |
|               | K.ELNARPLEVFMCSVLK.R [166, 181]     | SAR1B peptide ratio, 3  | 1.24              | 2.18   | 0.95  | 1.29     | 0.53     |
| <b>RABL2A</b> |                                     | RABL2A protein ratio    |                   |        |       | 0.85     | 0.26     |
|               | K.TKPSELDQGK.Y [5, 14]              | RABL2A peptide ratio, 1 | 12.85             | 2.43   | 0.12  | 0.34     | 5.54     |
|               | K.IICLGDSAVGK.S [23, 33]            | RABL2A peptide ratio, 2 | 0.56              | 0.98   | 1.34  | 0.84     | 0.32     |
|               | R.NLSTWYTELR.E [110, 119]           | RABL2A peptide ratio, 3 | 0.10              | 0.67   | 17.49 | 0.26     | 8.06     |
|               | R.EFRPEIPCIVVANK.I [120, 133]       | RABL2A peptide ratio, 4 | 3.63              | 3.14   | 0.19  | 0.51     | 1.52     |
| <b>DIRAS1</b> |                                     | DIRAS1 protein ratio    |                   |        |       | 0.97     | 0.26     |
|               | R.VVVFAGGGVVK.S [9, 19]             | DIRAS1 peptide ratio, 1 | 1.58              | 1.20   | 0.65  | 1.00     | 0.38     |
|               | R.DTYIPTIEDTYR.Q [33, 44]           | DIRAS1 peptide ratio, 2 | 1.07              | 0.91   | 1.32  | 1.07     | 0.17     |
|               | K.GSVEDIPVMLVGNK.C [108, 121]       | DIRAS1 peptide ratio, 3 | 2.09              | 1.09   | 0.21  | 0.48     | 0.77     |
|               | R.EAQAVAEWVK.C [133, 142]           | DIRAS1 peptide ratio, 4 | 2.98              | 2.02   | 0.32  | 0.76     | 1.10     |
| <b>ARL2</b>   |                                     | ARL2 protein ratio      |                   |        |       | 0.82     | 0.12     |
|               | R.ELQSLLEER.L [104, 113]            | ARL2 peptide ratio, 1   | 0.93              | 0.85   | 1.41  | 1.01     | 0.25     |
|               | R.LAGATLLIFANK.Q [114, 125]         | ARL2 peptide ratio, 2   | 0.79              | 0.81   | 0.71  | 0.77     | 0.04     |
|               | R.EVLELDSIR.S [139, 147]            | ARL2 peptide ratio, 3   | 0.77              | 0.79   | 0.66  | 0.74     | 0.06     |
| <b>ARL3</b>   |                                     | ARL3 protein ratio      |                   |        |       | 1.04     | 0.04     |
|               | R.ILLLGLDNAGK.T [19, 29]            | ARL3 peptide ratio, 1   | 1.03              | 1.05   | 1.13  | 1.07     | 0.05     |
|               | K.QLASEDISHITPTQGFNIK.S [35, 53]    | ARL3 peptide ratio, 2   | 1.01              | 0.99   | 1.21  | 1.06     | 0.10     |
|               | K.LSCVPVLIFANK.Q [115, 126]         | ARL3 peptide ratio, 3   | 0.83              | 0.91   | 1.37  | 0.99     | 0.24     |
| <b>TRIM23</b> |                                     | TRIM23 protein ratio    |                   |        |       | 0.96     | 0.18     |
|               | R.DALLLIFANK.Q [504, 513]           | TRIM23 peptide ratio, 1 | 0.93              | 0.95   | 1.00  | 0.96     | 0.03     |
| <b>RALB</b>   |                                     | RALB protein ratio      |                   |        |       | 0.97     | 0.31     |
|               | K.GQSSLALHK.V [29, 37]              | RALB peptide ratio, 1   | 1.47              | 1.50   | 1.12  | 1.34     | 0.17     |
|               | R.QVPVEEAR.S [158, 165]             | RALB peptide ratio, 2   | 1.12              | 1.22   | 1.15  | 1.16     | 0.04     |
|               | K.AEEWGVQYVETSAK.T [168, 181]       | RALB peptide ratio, 3   | 0.29              | 1.24   | 1.46  | 0.61     | 0.50     |
| <b>ARL15</b>  |                                     | ARL15 protein ratio     |                   |        |       | 1.19     | 0.24     |
|               | K.LCSESPDNVVSTTGFSIK.A [51, 68]     | ARL15 peptide ratio, 1  | 1.35              | 2.23   | 1.27  | 1.52     | 0.44     |
|               | K.AVPFQNAILNVK.E [69, 80]           | ARL15 peptide ratio, 2  | 0.90              | 0.87   | 1.36  | 1.00     | 0.23     |
|               | K.ELGGADNIR.K [81, 89]              | ARL15 peptide ratio, 3  | 1.23              | 1.18   | 0.78  | 1.02     | 0.20     |
|               | K.YFELEPLAR.G [157, 165]            | ARL15 peptide ratio, 4  | 4.78              | 0.99   | 0.86  | 1.26     | 1.82     |
|               | K.DSFSQLINLLEEK.D [184, 196]        | ARL15 peptide ratio, 5  | ND                | ND     | ND    | ND       | ND       |
| <b>RAB1A</b>  |                                     | RAB1A protein ratio     |                   |        |       | 1.00     | 0.03     |
|               | R.GAHGIIVVYDVTQESFNNVK.Q [82, 91]   | RAB1A peptide ratio, 1  | 0.91              | 0.80   | 1.19  | 0.94     | 0.17     |
|               | K.NATNVEQSFMTMAAEIK.K [156, 171]    | RAB1A peptide ratio, 2  | 0.89              | 0.98   | 1.17  | 1.00     | 0.11     |
|               | R.MGPGATAGGAEK.S [175, 186]         | RAB1A peptide ratio, 3  | 0.93              | 0.99   | 1.14  | 1.01     | 0.09     |
| <b>CDC42</b>  |                                     | CDC42 protein ratio     |                   |        |       | 0.83     | 0.01     |
| Isoform 1     | K.TCLLISYTTNK.F [16, 26]            | CDC42 peptide ratio, 1  | 0.92              | 0.83   | 0.75  | 0.83     | 0.07     |
| Isoform 1     | K.WVPEITHHCQPK.T [96, 106]          | CDC42 peptide ratio, 2  | 0.68              | 0.73   | 1.06  | 0.80     | 0.17     |

|               |                                                           |                         |      |       |      |      |         |
|---------------|-----------------------------------------------------------|-------------------------|------|-------|------|------|---------|
| Isoform 1     | K.TPFLLVGTQIDLR.D [107, 119]                              | CDC42 peptide ratio, 3  | 0.76 | 0.80  | 0.92 | 0.82 | 0.07    |
| <b>RAB21</b>  |                                                           | RAB21 protein ratio     |      |       |      | 0.96 | 0.14    |
|               | K.VVLLGEGCVGK.T [21, 31]                                  | RAB21 peptide ratio, 1  | 0.98 | 2.76  | 0.98 | 1.25 | 0.84    |
|               | R.VNLAIWDTAGQER.F [67, 79]                                | RAB21 peptide ratio, 2  | 0.91 | 0.83  | 1.12 | 0.94 | 0.12    |
|               | R.HVSIQEAESYAESVGAH.K [140, 15]                           | RAB21 peptide ratio, 3  | 0.77 | 0.88  | 1.34 | 0.94 | 0.25    |
| <b>RAB22A</b> |                                                           | RAB22A protein ratio    |      |       |      | 1.55 | 0.00    |
|               | K.TVQYQNELHK.F [45, 54]                                   | RAB22A peptide ratio, 1 | 1.44 | 1.44  | 1.87 | 1.56 | 0.20    |
|               | K.EETFSTLKN [89, 96]                                      | RAB22A peptide ratio, 2 | ND   | ND    | ND   | ND   | ND      |
|               | K.DYADSIHAIFVETSAKN.N [134, 149]                          | RAB22A peptide ratio, 3 | ND   | ND    | ND   | ND   | ND      |
|               | R.IPSTDANLPSGGK.G [165, 177]                              | RAB22A peptide ratio, 4 | 1.43 | 1.39  | 1.54 | 1.45 | 0.06    |
| <b>RAB17</b>  |                                                           | RAB17 protein ratio     |      |       |      | 1.65 | 0.01    |
|               | K.SILPTVGC <sup>C</sup> AFFTK.V [45, 57]                  | RAB17 peptide ratio, 1  | 1.67 | 2.95  | 1.11 | 1.63 | 0.77    |
|               | K.LEIWDTAGQEK.Y [68, 78]                                  | RAB17 peptide ratio, 2  | 2.05 | 1.20  | 2.03 | 1.66 | 0.40    |
|               | K.YHSV <sup>C</sup> CHLYFR.G [79, 88]                     | RAB17 peptide ratio, 3  | ND   | ND    | ND   | ND   | ND      |
|               | R.SDEEGQALR.G [183, 191]                                  | RAB17 peptide ratio, 4  | ND   | ND    | ND   | ND   | ND      |
| <b>RAB23</b>  |                                                           | RAB23 protein ratio     |      |       |      | 0.96 | 0.06    |
|               | K.TIGVDFLER.Q [40, 48]                                    | RAB23 peptide ratio, 1  | 0.91 | 0.93  | 1.19 | 0.99 | 0.13    |
|               | R.QIQVND <sup>E</sup> EDVRL.L [49, 58]                    | RAB23 peptide ratio, 2  | 0.95 | 1.07  | 1.06 | 1.02 | 0.05    |
|               | K.EDLNVNEVFK.Y [153, 162]                                 | RAB23 peptide ratio, 3  | 0.75 | 0.71  | 1.45 | 0.87 | 0.34    |
| <b>RAB1B</b>  |                                                           | RAB1B protein ratio     |      |       |      | 1.31 | 0.20    |
|               | -MNPEYDYLFLK.L [0, 9]                                     | RAB1B peptide ratio, 1  | 0.85 | 29.67 | 1.14 | 1.44 | 13.52   |
|               | K.NATNVEQAFMTMAAEIK.K [153, 16]                           | RAB1B peptide ratio, 2  | 1.20 | 1.33  | 1.45 | 1.32 | 0.10    |
|               | R.MGPGAASGG <sup>E</sup> RPNLK.I [172, 186]               | RAB1B peptide ratio, 3  | 0.72 | 0.76  | 2.50 | 0.97 | 0.83    |
| <b>RABL2B</b> |                                                           | RABL2B protein ratio    |      |       |      | ND   | 0.00    |
|               | K.AHA <sup>C</sup> IMVFDVQR.K [93, 104]                   | RABL2B peptide ratio, 1 | ND   | ND    | ND   | ND   | ND      |
| <b>RAP2C</b>  |                                                           | RAP2C protein ratio     |      |       |      | 0.99 | 0.00    |
|               | K.VPLILVGNK.V [108, 116]                                  | RAP2C peptide ratio, 1  | 0.86 | 0.93  | 1.28 | 0.99 | 0.18    |
|               | K.VDLEPER.E [117, 123]                                    | RAP2C peptide ratio, 2  | 1.02 | 3.21  | 0.57 | 0.98 | 1.15    |
|               | R.EVMSSEGR.A [124, 131]                                   | RAP2C peptide ratio, 3  | ND   | ND    | ND   | ND   | ND      |
|               | R.ALAQEWG <sup>C</sup> PFMETS <sup>A</sup> KS.S [132, 14] | RAP2C peptide ratio, 4  | ND   | ND    | ND   | ND   | ND      |
|               | R.QMNYSSLPEK.Q [162, 171]                                 | RAP2C peptide ratio, 5  | 1.40 | 1.36  | 1.10 | 1.27 | 0.13    |
| <b>RHOU</b>   |                                                           | RHOU protein ratio      |      |       |      | 0.79 | 0.05    |
|               | K. <sup>C</sup> VLVGDGAVGK.T [51, 61]                     | RHOU peptide ratio, 1   | 0.73 | 0.79  | 0.85 | 0.79 | 0.05    |
| <b>RABL5</b>  |                                                           | RABL5 protein ratio     |      |       |      | 0.69 | #DIV/0! |
|               | K.ILFVG <sup>C</sup> PCESGK.T [5, 15]                     | RABL5 peptide ratio, 1  | 0.65 | 0.77  | 0.64 | 0.68 | 0.06    |
|               | R.ILEFENPHVTSNNK.G [39, 52]                               | RABL5 peptide ratio, 2  | ND   | ND    | ND   | ND   | ND      |
|               | K.FESC <sup>C</sup> WPALMK.D [69, 78]                     | RABL5 peptide ratio, 3  | 0.69 | 0.61  | 0.73 | 0.67 | 0.05    |
|               | K.SIINSMSES <sup>R</sup> .D [166, 175]                    | RABL5 peptide ratio, 4  | 0.50 | 0.64  | 0.95 | 0.65 | 0.19    |
| <b>RRAGD</b>  |                                                           | RRAGD protein ratio     |      |       |      | 0.69 | 0.53    |
|               | K.MSPNETLFLESTNK.I [85, 98]                               | RRAGD peptide ratio, 1  | 1.64 | 1.00  | 1.14 | 1.21 | 0.27    |
|               | K.LNNTTVLYLK.E [320, 329]                                 | RRAGD peptide ratio, 2  | 0.08 | 0.13  | 5.16 | 0.15 | 2.38    |
| <b>ARL4C</b>  |                                                           | ARL4C protein ratio     |      |       |      | ND   | #DIV/0! |
|               | K.GIS <sup>C</sup> HFWDVGGQEK.L [60, 73]                  | ARL4C peptide ratio, 1  | ND   | ND    | ND   | ND   | ND      |
|               | K.FAENQGTPLLVIANK.Q [113, 127]                            | ARL4C peptide ratio, 2  | ND   | ND    | ND   | ND   | ND      |
|               | K.LYEMILK.R [174, 180]                                    | ARL4C peptide ratio, 3  | ND   | ND    | ND   | ND   | ND      |
| <b>RAC2</b>   |                                                           | RAC2 protein ratio      |      |       |      | 0.75 | 0.11    |
|               | R.HH <sup>C</sup> PSTPIILVGT <sup>K</sup> .L [102, 115]   | RAC2 peptide ratio, 1   | 0.27 | 0.68  | 1.79 | 0.52 | 0.64    |
|               | K.LAPITYPQGLALAK.E [133, 146]                             | RAC2 peptide ratio, 2   | 0.57 | 0.59  | 3.21 | 0.80 | 1.24    |
|               | R.AVLC <sup>C</sup> PQPTR.Q [174, 182]                    | RAC2 peptide ratio, 3   | 0.48 | 0.46  | 3.40 | 0.66 | 1.38    |
| <b>RAC1</b>   |                                                           | RAC1 protein ratio      |      |       |      | 0.87 | 0.01    |
|               | R.HH <sup>C</sup> PNTPIILVGT <sup>K</sup> .L [102, 115]   | RAC1 peptide ratio, 1   | 0.67 | 0.77  | 1.33 | 0.85 | 0.29    |
|               | K.LTPITYPQGLAMAK.E [133, 146]                             | RAC1 peptide ratio, 2   | 0.82 | 0.85  | 0.93 | 0.87 | 0.05    |
|               | K.LTPITYPQGLAMAK.E [133, 146]                             | RAC1 peptide ratio, 3   | 0.74 | 0.83  | 1.11 | 0.87 | 0.16    |
| <b>RRAGB</b>  |                                                           | RRAGB protein ratio     |      |       |      | 1.49 | 0.15    |
|               | R.SIIFANYIAR.D [57, 66]                                   | RRAGB peptide ratio, 1  | 1.42 | 1.87  | 0.85 | 1.24 | 0.42    |
|               | R.NFAEII <sup>E</sup> ADEVLLFER.A [253, 268]              | RRAGB peptide ratio, 2  | 1.19 | 1.46  | 1.16 | 1.26 | 0.13    |
|               | K.LAASFQSMEVR.N [305, 315]                                | RRAGB peptide ratio, 3  | 1.32 | 3.22  | 1.16 | 1.56 | 0.93    |
| <b>RAB27B</b> |                                                           | RAB27B protein ratio    |      |       |      | ND   | #DIV/0! |
|               | K.LLALGD <sup>S</sup> GVGK.T [11, 21]                     | RAB27B peptide ratio, 1 | ND   | ND    | ND   | ND   | ND      |
|               | R.VVYNAQGPN <sup>G</sup> SSGK.A [50, 63]                  | RAB27B peptide ratio, 2 | ND   | ND    | ND   | ND   | ND      |
|               | K.VHLQLWDTAGQER.F [67, 79]                                | RAB27B peptide ratio, 3 | ND   | ND    | ND   | ND   | ND      |
|               | K.YGIPYFETSAATGQNVEK.A [154, 1]                           | RAB27B peptide ratio, 4 | ND   | ND    | ND   | ND   | ND      |
| <b>RHOD</b>   |                                                           | RHOD protein ratio      |      |       |      | ND   | #DIV/0! |
|               | K.GKPVHLHIWDTAGQDDYDR.L [61,                              | RHOD peptide ratio, 1   | ND   | ND    | ND   | ND   | ND      |
|               | R.WYPEVNHFK.K [110, 119]                                  | RHOD peptide ratio, 2   | ND   | ND    | ND   | ND   | ND      |
|               | R.SVGAVAYLE <sup>C</sup> SAR.L [161, 173]                 | RHOD peptide ratio, 3   | ND   | ND    | ND   | ND   | ND      |
| <b>RHOQ</b>   |                                                           | RHOQ protein ratio      |      |       |      | ND   | #DIV/0! |
|               | K.EEWVPELK.E [100, 107]                                   | RHOQ peptide ratio, 1   | ND   | ND    | ND   | ND   | ND      |
|               | K.EIGACC <sup>C</sup> YVECSALTQK.G [153, 168]             | RHOQ peptide ratio, 2   | ND   | ND    | ND   | ND   | ND      |
|               | K.TVFDEAIIAILTPK.K [172, 185]                             | RHOQ peptide ratio, 3   | ND   | ND    | ND   | ND   | ND      |
| <b>RRAS2</b>  |                                                           | RRAS2 protein ratio     |      |       |      | 1.39 | 0.25    |
|               | R.LVVVGGGGV <sup>G</sup> GK.S [16, 26]                    | RRAS2 peptide ratio, 1  | 2.71 | 1.53  | 1.07 | 1.53 | 0.69    |
|               | R.LDILD <sup>T</sup> AGQEEFGAMRE.E [69, 84]               | RRAS2 peptide ratio, 2  | 0.71 | 0.89  | 1.57 | 0.95 | 0.37    |
|               | R.TGEGFLLVFSVTDR.G [90, 103]                              | RRAS2 peptide ratio, 3  | 1.83 | 0.86  | 2.30 | 1.40 | 0.60    |

|               |                                    |                         |      |       |      |      |         |
|---------------|------------------------------------|-------------------------|------|-------|------|------|---------|
|               | R.QVTQEEGQQLAR.Q [141, 152]        | RRAS2 peptide ratio, 4  | 1.11 | 1.30  | 1.94 | 1.37 | 0.35    |
| <b>RAB31</b>  |                                    | RAB31 protein ratio     |      |       |      | 0.25 | 0.61    |
|               | R.FHSLAPMYR.G [67, 76]             | RAB31 peptide ratio, 1  | 1.74 | 1.49  | 1.64 | 1.62 | 0.10    |
|               | R.GSAAVIVYDITK.Q [77, 89]          | RAB31 peptide ratio, 2  | 0.25 | 0.24  | 0.27 | 0.25 | 0.01    |
|               | K.QDSFYTLK.K [90, 97]              | RAB31 peptide ratio, 3  | 0.45 | 0.46  | 0.33 | 0.40 | 0.06    |
| <b>RAB32</b>  |                                    | RAB32 protein ratio     |      |       |      | 1.15 | 0.00    |
|               | K.VLVIGELGVGK.T [27, 37]           | RAB32 peptide ratio, 1  | 1.28 | 1.14  | 1.05 | 1.15 | 0.09    |
|               | R.SSTFEAVLK.W [110, 118]           | RAB32 peptide ratio, 2  | 1.20 | 1.27  | 1.01 | 1.15 | 0.11    |
|               | K.DNINIEEAR.F [176, 185]           | RAB32 peptide ratio, 3  | 1.17 | 1.23  | 1.05 | 1.15 | 0.07    |
| <b>RAB18</b>  |                                    | RAB18 protein ratio     |      |       |      | 1.48 | 0.06    |
|               | K.IIIGESGVGK.S [10, 20]            | RAB18 peptide ratio, 1  | 1.57 | 1.63  | 1.50 | 1.56 | 0.05    |
|               | K.LAIWDTAGQER.F [58, 68]           | RAB18 peptide ratio, 2  | 1.50 | 1.49  | 1.52 | 1.50 | 0.02    |
|               | R.TLTPSYR.G [71, 78]               | RAB18 peptide ratio, 3  | 1.41 | 1.43  | 1.39 | 1.41 | 0.02    |
|               | R.NDIVNMLVGNK.I [112, 122]         | RAB18 peptide ratio, 4  | 1.44 | 1.59  | 1.57 | 1.53 | 0.07    |
| <b>RAB9B</b>  |                                    | RAB9B protein ratio     |      |       |      | 1.02 | 0.03    |
|               | K.VILLGDGGVVK.S [9, 19]            | RAB9B peptide ratio, 1  | 1.10 | 1.12  | 0.96 | 1.05 | 0.07    |
|               | R.QSFENLGNWQK.E [92, 102]          | RAB9B peptide ratio, 2  | 1.78 | 0.86  | 0.77 | 0.99 | 0.45    |
|               | K.EFIYYADV.K.D [103, 111]          | RAB9B peptide ratio, 3  | ND   | ND    | ND   | ND   | ND      |
| <b>RAP1B</b>  |                                    | RAP1B protein ratio     |      |       |      | 0.78 | 0.15    |
|               | K.DTDDVPMILVGNK.C [104, 116]       | RAP1B peptide ratio, 1  | 0.57 | 0.71  | 1.00 | 0.72 | 0.18    |
|               | K.DTDDVPMILVGNK.C [104, 116]       | RAP1B peptide ratio, 2  | 1.98 | 0.86  | 0.89 | 1.07 | 0.52    |
|               | R.QWNNCAFLESSAK.S [136, 148]       | RAP1B peptide ratio, 3  | 0.75 | 0.77  | 0.81 | 0.78 | 0.03    |
| <b>ARFRP1</b> |                                    | ARFRP1 protein ratio    |      |       |      | 0.98 | 0.07    |
|               | K.TTFLEQSK.T [30, 37]              | ARFRP1 peptide ratio, 1 | 0.98 | 1.04  | 0.93 | 0.98 | 0.05    |
|               | K.ITTVGLNIGTVDVGK.A [52, 67]       | ARFRP1 peptide ratio, 2 | 1.61 | 1.33  | 0.81 | 1.15 | 0.33    |
|               | K.QDVETCLSIDIK.T [135, 147]        | ARFRP1 peptide ratio, 3 | 0.77 | 1.04  | 1.66 | 1.05 | 0.37    |
|               | K.TAFSDCTSK.I [148, 156]           | ARFRP1 peptide ratio, 4 | 1.02 | 3.46  | 0.44 | 0.84 | 1.31    |
|               | R.DCLTQACSALTGK.G [161, 173]       | ARFRP1 peptide ratio, 5 | 0.52 | 0.49  | 1.20 | 0.63 | 0.33    |
| <b>RAB20</b>  |                                    | RAB20 protein ratio     |      |       |      | ND   | #DIV/0! |
|               | K.IVLLGDMNVGK.T [7, 17]            | RAB20 peptide ratio, 1  | ND   | ND    | ND   | ND   | ND      |
|               | R.GAAAILTYDVNHR.Q [71, 84]         | RAB20 peptide ratio, 2  | ND   | ND    | ND   | ND   | ND      |
|               | R.FLGLTDTASK.D [94, 103]           | RAB20 peptide ratio, 3  | ND   | ND    | ND   | ND   | ND      |
|               | K.QVQLEDAVALYK.K [147, 158]        | RAB20 peptide ratio, 4  | ND   | ND    | ND   | ND   | ND      |
| <b>SAR1A</b>  |                                    | SAR1A protein ratio     |      |       |      | 1.63 | 0.04    |
|               | K.NYLPAINGIVFLVDCADHSR.L [87, 100] | SAR1A peptide ratio, 1  | 1.42 | 1.47  | 1.90 | 1.57 | 0.22    |
|               | R.TDAISEEK.L [138, 145]            | SAR1A peptide ratio, 2  | 1.47 | 1.52  | 1.78 | 1.58 | 0.14    |
|               | R.EIFGLYGQTTGK.G [148, 159]        | SAR1A peptide ratio, 3  | 1.60 | 1.74  | 1.65 | 1.66 | 0.06    |
| <b>RAB5C</b>  |                                    | RAB5C protein ratio     |      |       |      | 1.04 | 0.05    |
|               | R.QASPNIVIALAGNK.A [121, 134]      | RAB5C peptide ratio, 1  | 1.09 | 1.19  | 1.12 | 1.13 | 0.04    |
|               | K.NEPQATGAPGR.N [184, 195]         | RAB5C peptide ratio, 2  | 0.87 | 0.95  | 1.33 | 1.02 | 0.20    |
|               | R.GVDLQENNPASR.S [198, 209]        | RAB5C peptide ratio, 3  | 0.98 | 1.03  | 1.19 | 1.06 | 0.09    |
| <b>RAB7A</b>  |                                    | RAB7A protein ratio     |      |       |      | 1.25 | 0.04    |
|               | R.FQSLGVAFYR.G [69, 78]            | RAB7A peptide ratio, 1  | 1.29 | 1.34  | 1.09 | 1.23 | 0.11    |
|               | R.DEFLIQASPR.D [103, 112]          | RAB7A peptide ratio, 2  | 1.13 | 1.24  | 1.28 | 1.21 | 0.06    |
|               | R.AQAWCYSK.N [138, 145]            | RAB7A peptide ratio, 3  | 1.29 | 1.47  | 1.19 | 1.30 | 0.12    |
|               | K.NNIPYFETSAK.E [146, 156]         | RAB7A peptide ratio, 4  | 1.25 | 1.33  | 1.18 | 1.25 | 0.06    |
| <b>RAB9A</b>  |                                    | RAB9A protein ratio     |      |       |      | 1.03 | 0.12    |
|               | R.QVSTEEAQAWCR.D [131, 142]        | RAB9A peptide ratio, 1  | 1.20 | 1.27  | 1.17 | 1.21 | 0.04    |
|               | K.DATNVAAAFEEAVR.R [156, 169]      | RAB9A peptide ratio, 2  | 0.96 | 1.18  | 0.75 | 0.93 | 0.18    |
|               | R.SDHLIQDTDTVNLHR.K [178, 191]     | RAB9A peptide ratio, 3  | 0.95 | 1.02  | 0.98 | 0.98 | 0.03    |
| <b>RAB13</b>  |                                    | RAB13 protein ratio     |      |       |      | 0.97 | 0.37    |
|               | K.LQVWDTAGQER.F [58, 68]           | RAB13 peptide ratio, 1  | 0.80 | 11.43 | 1.69 | 1.56 | 4.81    |
|               | K.SFENIQNWMS.K [94, 103]           | RAB13 peptide ratio, 2  | 0.40 | 0.79  | 1.63 | 0.68 | 0.51    |
|               | K.ENASAGVER.L [107, 115]           | RAB13 peptide ratio, 3  | 0.74 | 0.84  | 1.67 | 0.95 | 0.42    |
| <b>RAB28</b>  |                                    | RAB28 protein ratio     |      |       |      | 0.64 | 0.02    |
|               | K.IVVLGDGASGK.T [14, 24]           | RAB28 peptide ratio, 1  | 0.40 | 0.79  | 1.63 | 0.68 | 0.51    |
|               | K.TSLTTCFAQETFGK.Q [25, 38]        | RAB28 peptide ratio, 2  | 0.76 | 0.69  | 0.75 | 0.73 | 0.03    |
|               | K.VSEESQPLVALVGNK.I [113, 129]     | RAB28 peptide ratio, 3  | 0.75 | 0.67  | 0.65 | 0.69 | 0.05    |
|               | K.VAAEILGIK.L [172, 180]           | RAB28 peptide ratio, 4  | 0.65 | 0.56  | 1.01 | 0.70 | 0.20    |
|               | K.AEIEQSQR.V [184, 191]            | RAB28 peptide ratio, 5  | 0.52 | 0.81  | 0.68 | 0.65 | 0.12    |
| <b>RAB27A</b> |                                    | RAB27A protein ratio    |      |       |      | 2.21 | 0.01    |
|               | K.FLALGDSGVGK.T [11, 21]           | RAB27A peptide ratio, 1 | 2.44 | 2.50  | 1.84 | 2.22 | 0.30    |
|               | K.TSVLYQYTDGK.F [22, 32]           | RAB27A peptide ratio, 2 | 2.31 | 2.71  | 1.76 | 2.19 | 0.39    |
|               | R.IHLQLWDTAGQER.F [67, 79]         | RAB27A peptide ratio, 3 | ND   | ND    | ND   | ND   | ND      |
|               | K.SDLEDQR.V [134, 140]             | RAB27A peptide ratio, 4 | 2.43 | 2.52  | 1.66 | 2.13 | 0.38    |
|               | K.SWIPEGVVR.S [191, 199]           | RAB27A peptide ratio, 5 | 2.17 | 2.28  | 1.97 | 2.13 | 0.13    |
| <b>RAB10</b>  |                                    | RAB10 protein ratio     |      |       |      | 1.21 | 0.04    |
|               | K.TYDLLFK.L [4, 10]                | RAB10 peptide ratio, 1  | 1.26 | 1.27  | 1.15 | 1.23 | 0.05    |
|               | R.FHTITTSYYR.G [70, 79]            | RAB10 peptide ratio, 2  | 1.20 | 1.27  | 1.18 | 1.21 | 0.04    |
|               | R.NIDEHANEDVER.M [105, 116]        | RAB10 peptide ratio, 3  | 1.00 | 1.09  | 1.40 | 1.14 | 0.17    |
| <b>RHEB</b>   |                                    | RHEB protein ratio      |      |       |      | 0.75 | 0.02    |
|               | K.IAILGYR.S [8, 14]                | RHEB peptide ratio, 1   | ND   | ND    | ND   | ND   | ND      |
|               | K.VQIPIMLVGNK.K [109, 119]         | RHEB peptide ratio, 2   | 0.80 | 0.84  | 0.74 | 0.79 | 0.04    |
|               | K.ALAESWNAAFLESSAK.E [135, 150]    | RHEB peptide ratio, 3   | 0.73 | 0.75  | 0.77 | 0.75 | 0.01    |

|                |                                   |                          |      |       |      |      |         |
|----------------|-----------------------------------|--------------------------|------|-------|------|------|---------|
|                | K.ENQTAVDVFR.R [151, 160]         | RHEB peptide ratio, 4    | 0.70 | 0.68  | 0.76 | 0.71 | 0.03    |
| <b>CDC42</b>   |                                   | CDC42 protein ratio      |      |       |      | 0.86 | 0.08    |
| Isoform 2      | K.YVECSALTQK.G [153, 162]         | CDC42 peptide ratio, 1   | 0.85 | 0.93  | 0.79 | 0.86 | 0.06    |
| Isoform 2      | K.NVFDAILAALPEPEPK.K [166, 182]   | CDC42 peptide ratio, 2   | 0.55 | 0.65  | 0.97 | 0.68 | 0.18    |
| <b>RAB6B</b>   |                                   | RAB6B protein ratio      |      |       |      | 0.69 | 0.22    |
|                | R.QITIEEGEQR.A [134, 143]         | RAB6B peptide ratio, 1   | 0.75 | 0.75  | 0.58 | 0.68 | 0.08    |
|                | K.ELSVMFIETSAK.T [146, 157]       | RAB6B peptide ratio, 2   | 1.92 | 0.95  | 0.95 | 1.14 | 0.46    |
|                | R.VASALPGMENVQEK.S [169, 182]     | RAB6B peptide ratio, 3   | 0.73 | 0.83  | 0.53 | 0.67 | 0.12    |
|                | R.VASALPGMENVQEK.S [169, 182]     | RAB6B peptide ratio, 4   | 0.79 | 0.48  | 1.17 | 0.71 | 0.28    |
| <b>RHOG</b>    |                                   | RHOG protein ratio       |      |       |      | 0.96 | 0.02    |
|                | R.TVNLNLWDTAGQEEYDR.L [49, 65]    | RHOG peptide ratio, 1    | 0.84 | 0.86  | 1.18 | 0.94 | 0.15    |
|                | K.EQGQAPITPQQGQALAK.Q [130, 146]  | RHOG peptide ratio, 2    | 0.79 | 0.92  | 1.35 | 0.97 | 0.24    |
|                | R.YLECSALQQDGVK.E [153, 165]      | RHOG peptide ratio, 3    | 0.86 | 0.96  | 1.12 | 0.97 | 0.11    |
| <b>RAB5B</b>   |                                   | RAB5B protein ratio      |      |       |      | 0.93 | 0.01    |
|                | R.QASPSIVIALAGNK.A [120, 133]     | RAB5B peptide ratio, 1   | 1.04 | 0.93  | 0.92 | 0.96 | 0.05    |
|                | K.TAMNVNDLFLAIK.K [165, 178]      | RAB5B peptide ratio, 2   | 0.96 | 1.01  | 0.85 | 0.94 | 0.07    |
|                | K.SEPQNLGGAAGR.S [183, 194]       | RAB5B peptide ratio, 3   | 0.85 | 0.92  | 1.06 | 0.93 | 0.09    |
|                | R.GVDLHEQSQQNK.S [197, 208]       | RAB5B peptide ratio, 4   | 0.89 | 0.94  | 0.96 | 0.93 | 0.03    |
| <b>RAP2B</b>   |                                   | RAP2B protein ratio      |      |       |      | 1.15 | 0.20    |
|                | R.VPMILVGNK.V [108, 116]          | RAP2B peptide ratio, 1   | 0.81 | 1.31  | 1.31 | 1.09 | 0.24    |
|                | R.VPMILVGNK.V [108, 116]          | RAP2B peptide ratio, 2   | ND   | ND    | ND   | ND   | ND      |
|                | K.VDLEGER.E [117, 123]            | RAP2B peptide ratio, 3   | 0.48 | 0.51  | 2.64 | 0.68 | 1.01    |
|                | K.ASVDELFAEIVR.Q [150, 161]       | RAP2B peptide ratio, 4   | 1.20 | 1.31  | 1.00 | 1.16 | 0.13    |
| <b>ARL8B</b>   |                                   | ARL8B protein ratio      |      |       |      | 1.31 | 0.17    |
|                | R.DLPNALDEK.Q [184, 192]          | ARL8B peptide ratio, 1   | 1.77 | 1.67  | 1.47 | 1.63 | 0.12    |
|                | K.MNLSAIQDR.E [198, 206]          | ARL8B peptide ratio, 2   | 1.23 | 1.33  | 1.20 | 1.25 | 0.06    |
|                | R.EICCSYSISCK.E [207, 216]        | ARL8B peptide ratio, 3   | 1.33 | 1.47  | 1.14 | 1.30 | 0.13    |
| <b>RHOH</b>    |                                   | RHOH protein ratio       |      |       |      | ND   | #DIV/0! |
|                | R.SNLPCTPVLVVATQTDQR.E [103, 116] | RHOH peptide ratio, 1    | ND   | ND    | ND   | ND   | ND      |
|                | R.ASCVNAMEGK.K [127, 136]         | RHOH peptide ratio, 2    | ND   | ND    | ND   | ND   | ND      |
|                | K.GYLECSALSNR.G [146, 156]        | RHOH peptide ratio, 3    | ND   | ND    | ND   | ND   | ND      |
|                | R.GVQQVFEC AVR.T [157, 167]       | RHOH peptide ratio, 4    | ND   | ND    | ND   | ND   | ND      |
| <b>RAP1A</b>   |                                   | RAP1A protein ratio      |      |       |      | 1.02 | 0.34    |
|                | R.VKDTEDEVPMILVGNK.C [102, 116]   | RAP1A peptide ratio, 1   | 0.89 | 18.35 | 1.25 | 1.52 | 8.15    |
|                | R.VKDTEDEVPMILVGNK.C [102, 116]   | RAP1A peptide ratio, 2   | 0.86 | 0.38  | 2.12 | 0.70 | 0.73    |
|                | K.DTEDVPMILVGNK.C [104, 116]      | RAP1A peptide ratio, 3   | 0.87 | 1.01  | 1.16 | 1.00 | 0.12    |
|                | R.QWCNCAFLESSAK.S [136, 148]      | RAP1A peptide ratio, 4   | 0.97 | 1.12  | 1.08 | 1.05 | 0.06    |
| <b>RAP2A</b>   |                                   | RAP2A protein ratio      |      |       |      | 0.89 | 0.08    |
|                | K.VPVILVGNK.V [108, 116]          | RAP2A peptide ratio, 1   | ND   | ND    | ND   | ND   | ND      |
|                | R.ALAEWGCPCPFMETS AK.S [132, 147] | RAP2A peptide ratio, 2   | 1.29 | 1.23  | 0.67 | 0.98 | 0.28    |
|                | K.TMVDLFAEIVR.Q [150, 161]        | RAP2A peptide ratio, 3   | 0.76 | 0.97  | 0.78 | 0.82 | 0.09    |
| <b>RRAS</b>    |                                   | RRAS protein ratio       |      |       |      | 0.67 | 0.00    |
|                | K.ICSVDGIPAR.L [68, 77]           | RRAS peptide ratio, 1    | ND   | ND    | ND   | ND   | ND      |
|                | R.QSFNEVGK.L [113, 120]           | RRAS peptide ratio, 2    | ND   | ND    | ND   | ND   | ND      |
|                | K.LFTQILR.V [121, 127]            | RRAS peptide ratio, 3    | 0.64 | 0.37  | 0.91 | 0.56 | 0.22    |
|                | K.ADLESQR.Q [143, 149]            | RRAS peptide ratio, 4    | 1.70 | 1.36  | 0.57 | 0.98 | 0.47    |
| <b>RAB11B</b>  |                                   | RAB11B protein ratio     |      |       |      | 1.22 | 0.21    |
|                | K.AQIWDTAGQERY.Y [61, 71]         | RAB11B peptide ratio, 1  | 1.39 | 1.51  | 1.44 | 1.45 | 0.05    |
|                | R.GAVGALLVYDI AK.H [82, 94]       | RAB11B peptide ratio, 2  | 1.63 | 1.78  | 1.33 | 1.56 | 0.19    |
|                | K.NILTEIYR.I [166, 173]           | RAB11B peptide ratio, 3  | 1.28 | 0.78  | 1.31 | 1.06 | 0.24    |
| <b>NKIRAS2</b> |                                   | NKIRAS2 protein ratio    |      |       |      | 0.90 | 0.00    |
|                | K.VVVCQGQASV GK.T [6, 16]         | NKIRAS2 peptide ratio, 1 | 0.88 | 0.83  | 0.82 | 0.84 | 0.03    |
|                | K.EVTIVVLGNK.C [111, 120]         | NKIRAS2 peptide ratio, 2 | ND   | ND    | ND   | ND   | ND      |
|                | R.VDPDVAQHWAK.S [129, 139]        | NKIRAS2 peptide ratio, 3 | ND   | ND    | ND   | ND   | ND      |
|                | R.SLLEPFVYLASK.M [155, 166]       | NKIRAS2 peptide ratio, 4 | 0.80 | 0.95  | 0.97 | 0.90 | 0.08    |
| <b>RAB33B</b>  |                                   | RAB33B protein ratio     |      |       |      | 0.93 | 0.04    |
|                | K.IIVIGDSNVGK.T [35, 45]          | RAB33B peptide ratio, 1  | 2.04 | 1.52  | 0.54 | 1.00 | 0.62    |
|                | R.AVEIDGER.I [73, 80]             | RAB33B peptide ratio, 2  | ND   | ND    | ND   | ND   | ND      |
|                | R.SAIQVPTDLAQK.F [153, 164]       | RAB33B peptide ratio, 3  | 0.85 | 0.86  | 1.09 | 0.92 | 0.11    |
| <b>ARL6</b>    |                                   | ARL6 protein ratio       |      |       |      | 0.71 | 0.00    |
|                | R.NLWEHYK.E [77, 84]              | ARL6 peptide ratio, 1    | ND   | ND    | ND   | ND   | ND      |
|                | K.EELDTLLNHPDIK.H [106, 118]      | ARL6 peptide ratio, 2    | ND   | ND    | ND   | ND   | ND      |
|                | R.IPILFFANK.M [122, 130]          | ARL6 peptide ratio, 3    | 0.74 | 0.81  | 0.62 | 0.71 | 0.08    |
|                | K.VSQLLCLENIK.D [142, 152]        | ARL6 peptide ratio, 4    | ND   | ND    | ND   | ND   | ND      |
| <b>RAC3</b>    |                                   | RAC3 protein ratio       |      |       |      | 0.43 | 0.00    |
|                | K.LAPITYPQGLAMAR.E [133, 146]     | RAC3 peptide ratio, 1    | 0.40 | 0.52  | 0.39 | 0.43 | 0.06    |
|                | K.LAPITYPQGLAMAR.E [133, 146]     | RAC3 peptide ratio, 2    | ND   | ND    | ND   | ND   | ND      |
|                | R.AVLCPPPVK.K [174, 182]          | RAC3 peptide ratio, 3    | ND   | ND    | ND   | ND   | ND      |
| <b>RAB3A</b>   |                                   | RAB3A protein ratio      |      |       |      | 0.44 | 0.01    |
|                | K.ESSDQNFDMFK.I [12, 23]          | RAB3A peptide ratio, 1   | 0.61 | 0.31  | 0.50 | 0.43 | 0.13    |
|                | K.TYSWDNAQVLLVGNK.C [121, 135]    | RAB3A peptide ratio, 2   | 0.45 | 0.47  | 0.36 | 0.42 | 0.05    |
|                | R.LVDVICEK.M [178, 185]           | RAB3A peptide ratio, 3   | ND   | ND    | ND   | ND   | ND      |
|                | K.MSES�DTADPAVTGAK.Q [186, 201]   | RAB3A peptide ratio, 4   | ND   | ND    | ND   | ND   | ND      |
| <b>RAB5A</b>   |                                   | RAB5A protein ratio      |      |       |      | 0.82 | 0.02    |

|               |                                    |                         |       |       |       |       |         |
|---------------|------------------------------------|-------------------------|-------|-------|-------|-------|---------|
|               | R.QASPNIVIALSGNK.A [120, 133]      | RAB5A peptide ratio, 1  | 0.87  | 0.81  | 0.87  | 0.85  | 0.03    |
|               | K.NEPQNPGANSAR.G [183, 194]        | RAB5A peptide ratio, 2  | 0.72  | 0.74  | 1.04  | 0.81  | 0.14    |
|               | R.GVDLTEPTQPTR.N [197, 208]        | RAB5A peptide ratio, 3  | 0.69  | 0.74  | 1.00  | 0.79  | 0.14    |
| <b>RAB6C</b>  |                                    | RAB6C protein ratio     |       |       |       | 1.25  | 0.02    |
|               | R.QVSIIEGER.K [134, 142]           | RAB6C peptide ratio, 1  | 1.12  | 1.19  | 1.35  | 1.21  | 0.09    |
|               | K.ELNVMFIETSAK.A [146, 157]        | RAB6C peptide ratio, 2  | 1.22  | 1.23  | 1.35  | 1.26  | 0.06    |
|               | R.VAAALPGMESTQDR.S [169, 182]      | RAB6C peptide ratio, 3  | 1.11  | 1.19  | 1.44  | 1.23  | 0.14    |
| <b>MRAS</b>   |                                    | MRAS protein ratio      |       |       |       | ND    | 0.01    |
|               | K.IFVPDYDPTIEDSYLK.H [36, 51]      | MRAS peptide ratio, 1   | ND    | ND    | ND    | ND    | ND      |
| <b>RAB8B</b>  |                                    | RAB8B protein ratio     |       |       |       | 2.65  | 0.03    |
|               | R.NIEEHASSDVER.M [104, 115]        | RAB8B peptide ratio, 1  | 2.31  | 2.47  | 3.52  | 2.67  | 0.54    |
|               | K.SSANVEEAFFTLAR.D [153, 166]      | RAB8B peptide ratio, 2  | 2.24  | 2.52  | 3.18  | 2.59  | 0.40    |
|               | K.MNDSNSAGAGGPVK.I [176, 189]      | RAB8B peptide ratio, 3  | 3.22  | 3.18  | 1.96  | 2.64  | 0.58    |
|               | K.MNDSNSAGAGGPVK.I [176, 189]      | RAB8B peptide ratio, 4  | 1.29  | 1.38  | 0.76  | 1.07  | 0.27    |
| <b>RAB7L1</b> |                                    | RAB7L1 protein ratio    |       |       |       | 1.04  | 0.14    |
|               | K.VLQWSDYEIVR.L [47, 57]           | RAB7L1 peptide ratio, 1 | 1.03  | 1.42  | 1.16  | 1.18  | 0.16    |
|               | K.CDLSPWAVSR.D [126, 135]          | RAB7L1 peptide ratio, 2 | 0.77  | 0.66  | 1.39  | 0.85  | 0.32    |
|               | K.ENGFTGWTTETSVK.E [144, 156]      | RAB7L1 peptide ratio, 3 | 1.38  | 1.05  | 0.96  | 1.10  | 0.18    |
| <b>RHOC</b>   |                                    | RHOC protein ratio      |       |       |       | 0.84  | 0.07    |
|               | K.HFCPNVPIILVGNK.K [104, 117]      | RHOC peptide ratio, 1   | 0.70  | 0.77  | 1.16  | 0.83  | 0.20    |
|               | K.HFCPNVPIILVGNKK.D [104, 118] (n  | RHOC peptide ratio, 2   | 0.86  | 0.95  | 0.95  | 0.92  | 0.04    |
|               | R.ISAFGYLECSAK.T [150, 161]        | RHOC peptide ratio, 3   | 0.63  | 0.77  | 0.86  | 0.74  | 0.10    |
| <b>RHOJ</b>   |                                    | RHOJ protein ratio      |       |       |       | 0.28  | 0.00    |
|               | K.AIGAQCYLECSALTQK.G [165, 180]    | RHOJ peptide ratio, 1   | 0.21  | 0.36  | 0.33  | 0.28  | 0.06    |
|               | K.AVFDEAILTIFHPK.K [184, 197]      | RHOJ peptide ratio, 2   | ND    | ND    | ND    | ND    | ND      |
| <b>RAB38</b>  |                                    | RAB38 protein ratio     |       |       |       | 12.12 | 1.37    |
|               | K.LLVIGDLGVGK.T [11, 21]           | RAB38 peptide ratio, 1  | 12.95 | 13.81 | 12.71 | 13.14 | 0.47    |
|               | K.VLHWDPETVVR.L [49, 59]           | RAB38 peptide ratio, 2  | 8.96  | 12.76 | 15.85 | 11.85 | 2.82    |
|               | K.LSLPNGKPVSVLLANK.C [111, 12      | RAB38 peptide ratio, 3  | 8.22  | 8.06  | 16.69 | 9.81  | 4.03    |
|               | K.ENINIDEASR.C [161, 170]          | RAB38 peptide ratio, 4  | ND    | ND    | ND    | ND    | ND      |
| <b>RAB25</b>  |                                    | RAB25 protein ratio     |       |       |       | ND    | #DIV/0! |
|               | K.VVLIGESGVGK.T [14, 24]           | RAB25 peptide ratio, 1  | ND    | ND    | ND    | ND    | ND      |
|               | R.TTIGVEFSTR.T [42, 51]            | RAB25 peptide ratio, 2  | ND    | ND    | ND    | ND    | ND      |
|               | K.AQIWDTAGLER.Y [62, 72]           | RAB25 peptide ratio, 3  | ND    | ND    | ND    | ND    | ND      |
|               | R.EVPTEEAR.M [133, 140]            | RAB25 peptide ratio, 4  | ND    | ND    | ND    | ND    | ND      |
| <b>RAB8A</b>  |                                    | RAB8A protein ratio     |       |       |       | 0.98  | #DIV/0! |
|               | R.NIEEHASADVEK.M [104, 115]        | RAB8A peptide ratio, 1  | 0.82  | 0.89  | 1.11  | 0.93  | 0.12    |
|               | K.LALDYGIK.F [138, 145]            | RAB8A peptide ratio, 2  | 1.00  | 1.11  | 0.99  | 1.03  | 0.05    |
|               | K.LEGNSPQGSNQGVI.I [176, 189]      | RAB8A peptide ratio, 3  | 0.88  | 0.95  | 1.17  | 0.99  | 0.12    |
| <b>ARL4A</b>  |                                    | ARL4A protein ratio     |       |       |       | ND    | #DIV/0! |
|               | K.TVTFHFWDVGGQEK.L [67, 80]        | ARL4A peptide ratio, 1  | ND    | ND    | ND    | ND    | ND      |
|               | R.ISENQGVPLIVANK.Q [120, 134]      | ARL4A peptide ratio, 2  | ND    | ND    | ND    | ND    | ND      |
|               | R.NLSLSLSEIEK.L [139, 148]         | ARL4A peptide ratio, 3  | ND    | ND    | ND    | ND    | ND      |
| <b>RAB6A</b>  |                                    | RAB6A protein ratio     |       |       |       | 1.06  | #DIV/0! |
|               | R.DSAAAVVVYDITNVNSFQQTTK.W         | RAB6A peptide ratio, 1  | 0.99  | 1.03  | 1.60  | 1.15  | 0.28    |
|               | K.WIDDVRTER.G [106, 114] (missed 1 | RAB6A peptide ratio, 2  | ND    | ND    | ND    | ND    | ND      |
|               | R.TDLADKR.Q [127, 133] (missed 1)  | RAB6A peptide ratio, 3  | 1.04  | 1.07  | 1.25  | 1.11  | 0.09    |
| <b>RAB2A</b>  |                                    | RAB2A protein ratio     |       |       |       | 0.77  | #DIV/0! |
|               | R.MITIDGK.Q [46, 52]               | RAB2A peptide ratio, 1  | 0.77  | 0.83  | 0.76  | 0.78  | 0.03    |
|               | K.KEEGEAFAR.E [130, 138] (missed 1 | RAB2A peptide ratio, 2  | 0.75  | 0.76  | 0.82  | 0.78  | 0.03    |
|               | K.TASNVEEAFINTAK.E [151, 164]      | RAB2A peptide ratio, 3  | 0.77  | 0.72  | 0.79  | 0.76  | 0.03    |
|               | K.IQEGVFDINNEANGIK.I [170, 185]    | RAB2A peptide ratio, 4  | 0.74  | 0.72  | 0.81  | 0.75  | 0.04    |
| <b>RAB3D</b>  |                                    | RAB3D protein ratio     |       |       |       | 0.69  | #DIV/0! |
|               | R.DAADQNFDYMFK.L [12, 23]          | RAB3D peptide ratio, 1  | 0.96  | 0.99  | 0.61  | 0.81  | 0.17    |
|               | K.LLLIGNSSVGK.T [24, 34]           | RAB3D peptide ratio, 2  | 0.76  | 0.61  | 0.57  | 0.64  | 0.08    |
|               | R.LADDLGFEFFFEASAK.E [152, 166]    | RAB3D peptide ratio, 3  | 0.86  | 0.87  | 0.62  | 0.76  | 0.12    |
| <b>RAB36</b>  |                                    | RAB36 protein ratio     |       |       |       | ND    | #DIV/0! |
|               | R.EHFHGQVSAACQR.R [100, 112]       | RAB36 peptide ratio, 1  | ND    | ND    | ND    | ND    | ND      |
|               | R.FEAGIPYSLQIWDTAGQEK.F [164,      | RAB36 peptide ratio, 2  | ND    | ND    | ND    | ND    | ND      |
|               | R.VAALAFEQSVLQDLER.Q [282, 297]    | RAB36 peptide ratio, 3  | ND    | ND    | ND    | ND    | ND      |
| <b>RAN</b>    |                                    | RAN protein ratio       |       |       |       | 1.04  | #DIV/0! |
|               | K.LVLVGDGGTGK.T [12, 22]           | RAN peptide ratio, 1    | 1.01  | 1.11  | 0.95  | 1.02  | 0.07    |
|               | K.YVATLGVEVHPLVFHTNR.G [38, 55]    | RAN peptide ratio, 2    | 0.87  | 1.09  | 1.24  | 1.04  | 0.15    |
|               | K.NVPNWHR.D [99, 105]              | RAN peptide ratio, 3    | 1.02  | 1.06  | 0.99  | 1.02  | 0.03    |
| <b>RAB40C</b> |                                    | RAB40C protein ratio    |       |       |       | ND    | #DIV/0! |
|               | R.VFSLQDLCCR.A [188, 197]          | RAB40C peptide ratio, 1 | ND    | ND    | ND    | ND    | ND      |
|               | R.SYSLASGAGGGGSK.G [239, 252]      | RAB40C peptide ratio, 2 | ND    | ND    | ND    | ND    | ND      |
| <b>ARL11</b>  |                                    | ARL11 protein ratio     |       |       |       | ND    | #DIV/0! |
|               | R.GCSALTGEGLPEALQSLWSLLK.S         | ARL11 peptide ratio, 1  | ND    | ND    | ND    | ND    | ND      |
| <b>RAB24</b>  |                                    | RAB24 protein ratio     |       |       |       | 1.07  | #DIV/0! |
|               | R.SLEEGCQIYLCGTK.S [107, 120]      | RAB24 peptide ratio, 1  | 0.53  | 2.14  | 0.55  | 0.72  | 0.75    |
|               | R.VDFHVDVQDYADNIK.A [133, 146]     | RAB24 peptide ratio, 2  | 1.11  | 2.35  | 0.99  | 1.29  | 0.62    |
|               | K.AQLFETSSK.T [147, 155]           | RAB24 peptide ratio, 3  | 0.96  | 0.91  | 0.85  | 0.90  | 0.05    |
|               | K.TGQSVDELQK.V [156, 166]          | RAB24 peptide ratio, 4  | 1.08  | 1.17  | 0.84  | 1.01  | 0.14    |

|               |                                   |                         |      |       |      |      |         |
|---------------|-----------------------------------|-------------------------|------|-------|------|------|---------|
| <b>RAB7B</b>  |                                   | RAB7B protein ratio     |      |       |      | 3.07 | #DIV/0! |
|               | K.IIILGDTTLK.L [48, 57]           | RAB7B peptide ratio, 1  | 4.10 | 7.54  | 2.40 | 3.78 | 2.14    |
|               | K.LQIWDGTGGQER.F [58, 68]         | RAB7B peptide ratio, 2  | 3.97 | 7.01  | 1.75 | 3.11 | 2.15    |
|               | R.YQSILENHLTESIK.L [174, 187]     | RAB7B peptide ratio, 3  | 3.46 | 1.47  | 5.02 | 2.56 | 1.45    |
| <b>ARL8A</b>  |                                   | ARL8A protein ratio     |      |       |      | 0.65 | #DIV/0! |
|               | K.LWDIGGQPR.F [68, 76]            | ARL8A peptide ratio, 1  | ND   | ND    | ND   | ND   | ND      |
|               | R.GVSAIVYMVDAADQEK.I [87, 102]    | ARL8A peptide ratio, 2  | 0.72 | 0.67  | 0.59 | 0.66 | 0.06    |
|               | R.DLPGALDEKELIEK.M [132, 145] (m  | ARL8A peptide ratio, 3  | 0.73 | 0.49  | 0.98 | 0.68 | 0.20    |
| <b>RAB39B</b> |                                   | RAB39B protein ratio    |      |       |      | 5.60 | #DIV/0! |
|               | R.SFQNVHEWLEETK.V [95, 107]       | RAB39B peptide ratio, 1 | 7.66 | 3.28  | 1.06 | 2.18 | 2.74    |
|               | K.CDLDTQR.Q [124, 130]            | RAB39B peptide ratio, 2 | ND   | ND    | ND   | ND   | ND      |
|               | K.LAAAYGMK.Y [140, 147]           | RAB39B peptide ratio, 3 | ND   | ND    | ND   | ND   | ND      |
|               | K.YIETSAR.D [148, 154]            | RAB39B peptide ratio, 4 | 1.67 | 2.27  | 7.15 | 2.55 | 2.45    |
|               | K.SGFVFNVVHSSEEVVK.S [190, 205]   | RAB39B peptide ratio, 5 | 5.83 | 1.33  | 1.64 | 1.96 | 2.05    |
| <b>DIRAS2</b> |                                   | DIRAS2 protein ratio    |      |       |      | 0.06 | #DIV/0! |
|               | R.VAVFGAGGVGK.S [9, 19]           | DIRAS2 peptide ratio, 1 | 0.41 | 3.23  | 0.83 | 0.76 | 1.24    |
|               | K.SICTLQITDTTGS HQFPAMQR.L [52    | DIRAS2 peptide ratio, 2 | 1.41 | 0.87  | 0.58 | 0.84 | 0.35    |
| <b>RAB2B</b>  |                                   | RAB2B protein ratio     |      |       |      | 0.92 | #DIV/0! |
|               | R.ETFNHLTSWLEDAR.Q [26, 39]       | RAB2B peptide ratio, 1  | 0.79 | 0.84  | 1.09 | 0.89 | 0.13    |
|               | K.REEGEAFAR.E [65, 73] (missed 1) | RAB2B peptide ratio, 2  | 2.39 | 0.70  | 4.25 | 1.44 | 1.45    |
|               | K.TACNVVEAFINTAK.E [86, 99]       | RAB2B peptide ratio, 3  | 0.70 | 0.69  | 1.28 | 0.82 | 0.28    |
| <b>RAB37</b>  |                                   | RAB37 protein ratio     |      |       |      | ND   | #DIV/0! |
|               | R.SPPCSPSYDLTGK.V [18, 30]        | RAB37 peptide ratio, 1  | ND   | ND    | ND   | ND   | ND      |
|               | K.VMLLGDTGVGK.T [31, 41]          | RAB37 peptide ratio, 2  | ND   | ND    | ND   | ND   | ND      |
|               | K.TCFLIQFK.D [42, 49]             | RAB37 peptide ratio, 3  | ND   | ND    | ND   | ND   | ND      |
|               | R.AGHQADEPSFQIR.D [194, 206]      | RAB37 peptide ratio, 4  | ND   | ND    | ND   | ND   | ND      |
| <b>ARL5B</b>  |                                   | ARL5B protein ratio     |      |       |      | 1.04 | #DIV/0! |
|               | K.LWSLFCNQEHK.V [7, 17]           | ARL5B peptide ratio, 1  | 4.84 | 2.70  | 0.24 | 0.63 | 1.88    |
|               | K.NTHFLMWDIGGQESLR.S [58, 73]     | ARL5B peptide ratio, 2  | 2.08 | 1.34  | 0.67 | 1.11 | 0.58    |
|               | K.AAVLIFANK.Q [117, 125]          | ARL5B peptide ratio, 3  | 3.99 | 2.21  | 0.77 | 1.49 | 1.32    |
|               | K.GCMTAAEISK.Y [130, 139]         | ARL5B peptide ratio, 4  | 2.15 | 1.19  | 0.95 | 1.27 | 0.52    |
| <b>RAB2B</b>  |                                   | RAB2B protein ratio     |      |       |      | 0.86 | #DIV/0! |
|               | R.MVNIDGK.Q [46, 52]              | RAB2B peptide ratio, 1  | 0.84 | 0.82  | 0.84 | 0.84 | 0.01    |
|               | K.IQQGLFDVHNEANGIK.I [170, 185]   | RAB2B peptide ratio, 2  | 0.85 | 1.04  | 0.80 | 0.88 | 0.10    |
|               | K.IGPQQSISTSVGSPASQR.N [186, 2    | RAB2B peptide ratio, 3  | 0.61 | 0.72  | 1.18 | 0.77 | 0.25    |
| <b>RABL3</b>  |                                   | RABL3 protein ratio     |      |       |      | 0.82 | #DIV/0! |
|               | R.WSLEALNR.D [108, 115]           | RABL3 peptide ratio, 1  | 0.84 | 0.82  | 0.84 | 0.84 | 0.01    |
|               | R.YLAAGSSNAVK.L [184, 194]        | RABL3 peptide ratio, 2  | 0.85 | 1.04  | 0.80 | 0.88 | 0.10    |
|               | R.EGNQIPGFDR.K [211, 221]         | RABL3 peptide ratio, 3  | 0.61 | 0.72  | 1.18 | 0.77 | 0.25    |
| <b>RRAGA</b>  |                                   | RRAGA protein ratio     |      |       |      | 1.27 | #DIV/0! |
|               | R.LGATIDVEHSHVR.F [38, 50]        | RRAGA peptide ratio, 1  | 1.93 | 8.05  | 0.79 | 1.58 | 3.18    |
|               | R.NFAQIIEADEVLLFER.A [192, 207]   | RRAGA peptide ratio, 2  | 1.36 | 1.35  | 0.94 | 1.18 | 0.19    |
| <b>RABL6</b>  |                                   | RABL6 protein ratio     |      |       |      |      | #DIV/0! |
|               | K.LVGSDQAPGR.D [7, 16]            | RABL6 peptide ratio, 1  | 1.92 | 0.73  | 0.33 | 0.61 | 0.68    |
|               | K.NIPAGLQSMNQALQR.R [19, 33]      | RABL6 peptide ratio, 2  | 2.43 | 1.56  | 1.20 | 1.59 | 0.52    |
|               | K.FFNIPFLQLQR.E [226, 236]        | RABL6 peptide ratio, 3  | 1.69 | 0.56  | 2.34 | 1.07 | 0.74    |
| <b>RAB4B</b>  |                                   | RAB4B protein ratio     |      |       |      | 0.73 | #DIV/0! |
|               | K.FLVIGSAGTGK.S [45, 55]          | RAB4B peptide ratio, 1  | 0.66 | 0.71  | 0.77 | 0.71 | 0.04    |
|               | K.SCLLHQFIENK.F [56, 66]          | RAB4B peptide ratio, 2  | 3.22 | 20.45 | 0.35 | 0.92 | 8.88    |
|               | K.IDSGELDPER.M [207, 216]         | RAB4B peptide ratio, 3  | ND   | ND    | ND   | ND   | ND      |
|               | R.MGSGIQYGDASLR.Q [217, 229]      | RAB4B peptide ratio, 4  | 0.58 | 0.61  | 0.86 | 0.66 | 0.12    |
| <b>ARF1</b>   |                                   | ARF1 protein ratio      |      |       |      | 1.01 | #DIV/0! |
|               | K.NISFTVWDVGGQDK.I [59, 72]       | ARF1 peptide ratio, 1   | 1.09 | 1.14  | 1.02 | 1.08 | 0.05    |
|               | K.QDLPNAMNAAEITDK.L [127, 141]    | ARF1 peptide ratio, 2   | 0.76 | 0.82  | 1.34 | 0.92 | 0.26    |
|               | K.QDLPNAMNAAEITDK.L [127, 141]    | ARF1 peptide ratio, 3   | 0.85 | 1.12  | 1.31 | 1.06 | 0.19    |
| <b>ARF3</b>   |                                   | ARF3 protein ratio      |      |       |      | 1.05 | #DIV/0! |
|               | R.VNEAREELMR.M [99, 108] (missed  | ARF3 peptide ratio, 1   | 0.66 | 0.90  | 1.27 | 0.88 | 0.25    |
|               | R.VNEAREELMR.M [99, 108] (missed  | ARF3 peptide ratio, 2   | ND   | ND    | ND   | ND   | ND      |
|               | K.LGLHSLR.H [142, 148]            | ARF3 peptide ratio, 3   | 1.05 | 1.08  | 1.00 | 1.04 | 0.03    |
| <b>ARF4</b>   |                                   | ARF4 protein ratio      |      |       |      | 1.05 | #DIV/0! |
|               | K.NICFTVWDVGGQDR.I [59, 72]       | ARF4 peptide ratio, 1   | 0.93 | 0.99  | 1.21 | 1.03 | 0.12    |
|               | R.IQEVADELQK.M [99, 108]          | ARF4 peptide ratio, 2   | 0.97 | 1.03  | 1.24 | 1.07 | 0.11    |
|               | R.DAVLLL FANK.Q [117, 126]        | ARF4 peptide ratio, 3   | 0.99 | 1.04  | 1.19 | 1.07 | 0.08    |
|               | K.LGLQSLR.N [142, 148]            | ARF4 peptide ratio, 4   | 0.97 | 1.05  | 1.15 | 1.05 | 0.07    |
| <b>ARF5</b>   |                                   | ARF5 protein ratio      |      |       |      | 1.13 | #DIV/0! |
|               | K.NICFTVWDVGGQDK.I [59, 72]       | ARF5 peptide ratio, 1   | 1.13 | 1.17  | 1.10 | 1.13 | 0.03    |
|               | R.VQESADELQK.M [99, 108]          | ARF5 peptide ratio, 2   | 1.80 | 1.17  | 0.58 | 0.96 | 0.49    |
|               | K.LGLQHLSR.S [142, 148]           | ARF5 peptide ratio, 3   | 1.22 | 1.17  | 0.91 | 1.08 | 0.13    |
| <b>ARF6</b>   |                                   | ARF6 protein ratio      |      |       |      | 0.90 | #DIV/0! |
|               | R.ILMLGLDAAGK.T [15, 25]          | ARF6 peptide ratio, 1   | ND   | ND    | ND   | ND   | ND      |
|               | R.ILMLGLDAAGK.T [15, 25]          | ARF6 peptide ratio, 2   | ND   | ND    | ND   | ND   | ND      |
|               | K.LGQSVTTIPTVGFNVETVTK.N [34      | ARF6 peptide ratio, 3   | 0.85 | 0.81  | 1.12 | 0.90 | 0.14    |
|               | K.FNVWDVGGQDK.I [58, 68]          | ARF6 peptide ratio, 4   | 0.82 | 0.91  | 1.10 | 0.93 | 0.12    |
| <b>RALA</b>   |                                   | RALA protein ratio      |      |       |      | 1.05 | #DIV/0! |

|                |                                         |                          |      |      |      |      |         |
|----------------|-----------------------------------------|--------------------------|------|------|------|------|---------|
|                | K.GQNSLALHK.V [7, 15]                   | RALA peptide ratio, 1    | 1.09 | 1.22 | 0.88 | 1.05 | 0.14    |
|                | K.EDENVPFLLVGNK.S [115, 127]            | RALA peptide ratio, 2    | ND   | ND   | ND   | ND   | ND      |
|                | R.QVSVEEAQN [135, 142]                  | RALA peptide ratio, 3    | 1.00 | 1.05 | 1.01 | 1.02 | 0.02    |
|                | R.AEQWNVNYVETSAK.T [145, 158]           | RALA peptide ratio, 4    | 0.89 | 0.99 | 1.06 | 0.98 | 0.07    |
| <b>RHOT1</b>   |                                         | RHOT1 protein ratio      |      |      |      | ND   | #DIV/0! |
|                | R.LPLILVGNK.S [110, 118]                | RHOT1 peptide ratio, 1   | ND   | ND   | ND   | ND   | ND      |
|                | K.AVLHPTGPLYCPEEK.E [164, 178]          | RHOT1 peptide ratio, 2   | ND   | ND   | ND   | ND   | ND      |
|                | R.ICFNTPLAPQALEDVK.N [214, 229]         | RHOT1 peptide ratio, 3   | ND   | ND   | ND   | ND   | ND      |
| <b>ARL1</b>    |                                         | ARL1 protein ratio       |      |      |      | 1.17 | #DIV/0! |
|                | R.ILILGLDGAGK.T [19, 29]                | ARL1 peptide ratio, 1    | ND   | ND   | ND   | ND   | ND      |
|                | K.FQVWDLGGQTSIRPYWR.C [62, 78]          | ARL1 peptide ratio, 2    | 0.69 | 0.63 | 1.23 | 0.78 | 0.27    |
|                | K.AILVVFANK.Q [118, 126]                | ARL1 peptide ratio, 3    | 1.32 | 1.14 | 1.25 | 1.23 | 0.07    |
| <b>RAC1</b>    |                                         | RAC1 protein ratio       |      |      |      | ND   | #DIV/0! |
|                | R.LRPLSYPQTVGETYGK.D [66, 81]           | RAC1 peptide ratio, 1    | ND   | ND   | ND   | ND   | ND      |
| <b>RABL2B</b>  |                                         | RABL2B protein ratio     |      |      |      | 0.84 | #DIV/0! |
|                | K.IDADINVTQK.S [134, 143]               | RABL2B peptide ratio, 1  | 0.77 | 0.97 | 0.80 | 0.84 | 0.09    |
| <b>ARL16</b>   |                                         | ARL16 protein ratio      |      |      |      | ND   | #DIV/0! |
|                | K.GDLGEPPTTRPTVGTNLTDIVAQR.R [166, 176] | ARL16 peptide ratio, 1   | ND   | ND   | ND   | ND   | ND      |
|                | K.QNITAEISAR.E [166, 176]               | ARL16 peptide ratio, 2   | ND   | ND   | ND   | ND   | ND      |
|                | R.EGTGLAGVLAWLQATHR.A [177, 193]        | ARL16 peptide ratio, 3   | ND   | ND   | ND   | ND   | ND      |
| <b>REM1</b>    |                                         | REM1 protein ratio       |      |      |      | ND   | #DIV/0! |
|                | R.LSTVPSTQSQHPR.L [32, 44]              | REM1 peptide ratio, 1    | ND   | ND   | ND   | ND   | ND      |
|                | K.TSLASLFAGK.Q [93, 102]                | REM1 peptide ratio, 2    | ND   | ND   | ND   | ND   | ND      |
|                | R.DLHEQLGEDVYER.T [106, 118]            | REM1 peptide ratio, 3    | ND   | ND   | ND   | ND   | ND      |
|                | R.GSFESASELR.I [166, 175]               | REM1 peptide ratio, 4    | ND   | ND   | ND   | ND   | ND      |
| <b>RAB14</b>   |                                         | RAB14 protein ratio      |      |      |      | 0.55 | #DIV/0! |
|                | K.YIIIGDMGVGK.S [13, 23]                | RAB14 peptide ratio, 1   | 0.57 | 0.61 | 0.50 | 0.56 | 0.05    |
|                | R.STYNHLSSWLTAR.N [96, 109]             | RAB14 peptide ratio, 2   | 0.54 | 0.58 | 0.52 | 0.54 | 0.02    |
|                | K.TGENVEDAFLEAAK.K [156, 169]           | RAB14 peptide ratio, 3   | 0.48 | 0.49 | 0.59 | 0.52 | 0.05    |
| <b>SRPRB</b>   |                                         | SRPRB protein ratio      |      |      |      | 1.51 | #DIV/0! |
|                | R.AVLLVGLCDSGK.T [65, 76]               | SRPRB peptide ratio, 1   | 0.97 | 1.07 | 1.69 | 1.17 | 0.32    |
|                | R.DTQTSITDSCAVYR.V [90, 103]            | SRPRB peptide ratio, 2   | 1.16 | 1.40 | 1.73 | 1.40 | 0.23    |
|                | K.LIQQQLEK.E [191, 198]                 | SRPRB peptide ratio, 3   | 1.38 | 1.54 | 1.69 | 1.53 | 0.13    |
| <b>RAB35</b>   |                                         | RAB35 protein ratio      |      |      |      | 1.13 | #DIV/0! |
|                | R.TITSTYYR.G [71, 78]                   | RAB35 peptide ratio, 1   | 1.01 | 1.20 | 1.21 | 1.13 | 0.09    |
|                | R.WLHEINQNCDDVCR.I [101, 114]           | RAB35 peptide ratio, 2   | 0.74 | 0.81 | 1.65 | 0.94 | 0.41    |
|                | K.VVETEDAYK.F [128, 136]                | RAB35 peptide ratio, 3   | 1.01 | 1.20 | 1.21 | 1.13 | 0.09    |
|                | K.FAGQMGIQLFETSAK.E [137, 151]          | RAB35 peptide ratio, 4   | 1.00 | 1.33 | 1.57 | 1.26 | 0.23    |
|                | K.FAGQMGIQLFETSAK.E [137, 151]          | RAB35 peptide ratio, 5   | ND   | ND   | ND   | ND   | ND      |
| <b>RAB3B</b>   |                                         | RAB3B protein ratio      |      |      |      | ND   | #DIV/0! |
|                | K.DASDQNFDFYMFK.L [12, 23]              | RAB3B peptide ratio, 1   | ND   | ND   | ND   | ND   | ND      |
|                | K.GQLLAEQLGFDFFEASAK.E [149, 164]       | RAB3B peptide ratio, 2   | ND   | ND   | ND   | ND   | ND      |
|                | K.MSDSLDTPSMLGSSK.N [186, 201]          | RAB3B peptide ratio, 3   | ND   | ND   | ND   | ND   | ND      |
| <b>RAB30</b>   |                                         | RAB30 protein ratio      |      |      |      | 2.96 | #DIV/0! |
|                | K.IVLIGNAGVGK.T [11, 21]                | RAB30 peptide ratio, 1   | 2.53 | 1.50 | 5.17 | 2.39 | 1.55    |
|                | R.EIEQYASNK.V [105, 113]                | RAB30 peptide ratio, 2   | 2.91 | 1.92 | 5.80 | 2.89 | 1.64    |
|                | K.VITVLVGNK.I [114, 122]                | RAB30 peptide ratio, 3   | 1.18 | 1.37 | 2.46 | 1.51 | 0.56    |
|                | K.LFLDLACR.L [161, 168]                 | RAB30 peptide ratio, 4   | 6.05 | 5.59 | 1.19 | 2.54 | 2.19    |
|                | R.QNTLVNNSVSSPLPGEK.S [175, 190]        | RAB30 peptide ratio, 5   | 2.10 | 2.23 | 4.81 | 2.65 | 1.25    |
| <b>RHOF</b>    |                                         | RHOF protein ratio       |      |      |      | ND   | #DIV/0! |
|                | K.IVIVGDGGCGK.T [21, 31]                | RHOF peptide ratio, 1    | ND   | ND   | ND   | ND   | ND      |
|                | K.YTASVTVGSK.E [55, 64]                 | RHOF peptide ratio, 2    | ND   | ND   | ND   | ND   | ND      |
|                | K.EVTLNLYDTAGQEDYDR.L [65, 81]          | RHOF peptide ratio, 3    | ND   | ND   | ND   | ND   | ND      |
|                | K.WFPEVTHFCR.G [112, 121]               | RHOF peptide ratio, 4    | ND   | ND   | ND   | ND   | ND      |
|                | R.AALYLECSAK.F [166, 175]               | RHOF peptide ratio, 5    | ND   | ND   | ND   | ND   | ND      |
| <b>RAB34</b>   |                                         | RAB34 protein ratio      |      |      |      | 1.71 | #DIV/0! |
|                | K.VIVVGDLVSVGK.T [54, 64]               | RAB34 peptide ratio, 1   | 2.62 | 1.44 | 1.48 | 1.71 | 0.55    |
|                | R.FEVLGIPFSLQLWDTAGQER.F [93, 103]      | RAB34 peptide ratio, 2   | ND   | ND   | ND   | ND   | ND      |
|                | K.ENDPSSVLLFLVGSK.K [152, 166]          | RAB34 peptide ratio, 3   | 1.61 | 1.23 | 1.89 | 1.53 | 0.27    |
|                | K.AEYWAVSSLTGENVR.E [191, 205]          | RAB34 peptide ratio, 4   | 1.71 | 1.69 | 1.78 | 1.72 | 0.04    |
|                | R.INSDDSNLYLTASK.K [238, 251]           | RAB34 peptide ratio, 5   | ND   | ND   | ND   | ND   | ND      |
| <b>RAB43</b>   |                                         | RAB43 protein ratio      |      |      |      | 0.62 | #DIV/0! |
|                | K.YAGSNIVQLLIGNK.S [118, 131]           | RAB43 peptide ratio, 1   | 0.65 | 0.63 | 0.58 | 0.62 | 0.03    |
|                | K.DSSNVEEAFLR.V [164, 174]              | RAB43 peptide ratio, 2   | 0.50 | 0.67 | 0.92 | 0.66 | 0.17    |
|                | R.VATELIMR.H [175, 182]                 | RAB43 peptide ratio, 3   | ND   | ND   | ND   | ND   | ND      |
|                | K.SPDIQLNSK.D [192, 201]                | RAB43 peptide ratio, 4   | 0.46 | 0.64 | 2.04 | 0.71 | 0.71    |
| <b>NKIRAS1</b> |                                         | NKIRAS1 protein ratio    |      |      |      | 1.87 | #DIV/0! |
|                | K.VVVCGLLSVGK.T [6, 16]                 | NKIRAS1 peptide ratio, 1 | 0.98 | 1.22 | 0.97 | 1.04 | 0.12    |
|                | R.QVDAEVAQQWAK.S [128, 139]             | NKIRAS1 peptide ratio, 2 | ND   | ND   | ND   | ND   | ND      |
|                | K.TLIEPFTLLASK.L [155, 166]             | NKIRAS1 peptide ratio, 3 | 1.67 | 2.02 | 1.74 | 1.80 | 0.15    |
| <b>RAB12</b>   |                                         | RAB12 protein ratio      |      |      |      | 0.54 | #DIV/0! |
|                | R.AGGGGGLGAGSPALSGGQGR.R [155, 166]     | RAB12 peptide ratio, 1   | 0.48 | 0.53 | 0.58 | 0.53 | 0.04    |
|                | K.LQVIIIIGSR.G [42, 50]                 | RAB12 peptide ratio, 2   | 0.77 | 0.87 | 0.38 | 0.59 | 0.21    |
|                | R.FTDDTFCEACK.S [61, 71]                | RAB12 peptide ratio, 3   | 0.50 | 0.58 | 0.45 | 0.50 | 0.06    |





|               |                                                           |                         |       |       |      |      |         |
|---------------|-----------------------------------------------------------|-------------------------|-------|-------|------|------|---------|
|               | K.AGLLIFANK.Q [80, 88]                                    | ARL5A peptide ratio, 3  | ND    | ND    | ND   | ND   | ND      |
| <b>SAR1B</b>  |                                                           | SAR1B protein ratio     |       |       |      | 1.06 | #DIV/0! |
|               | K.IDRPEAISEER.L [135, 145]                                | SAR1B peptide ratio, 1  | 0.83  | 0.70  | 1.45 | 0.90 | 0.33    |
|               | R.EMFGLYGQTTGK.G [148, 159]                               | SAR1B peptide ratio, 2  | 1.21  | 0.83  | 0.51 | 0.75 | 0.28    |
|               | K.ELNARPLEVFMCSVLK.R [166, 181]                           | SAR1B peptide ratio, 3  | ND    | ND    | ND   | ND   | ND      |
| <b>RABL2A</b> |                                                           | RABL2A protein ratio    |       |       |      | 0.88 | #DIV/0! |
|               | K.TKPSELDQGK.Y [5, 14]                                    | RABL2A peptide ratio, 1 | ND    | ND    | ND   | ND   | ND      |
|               | K.IICLGDSAVGK.S [23, 33]                                  | RABL2A peptide ratio, 2 | 0.75  | 0.65  | 1.53 | 0.85 | 0.39    |
|               | R.NLSTWYTELR.E [110, 119]                                 | RABL2A peptide ratio, 3 | 0.82  | 0.64  | 1.74 | 0.89 | 0.48    |
|               | R.EFRPEIPCIVVANK.I [120, 133]                             | RABL2A peptide ratio, 4 | 10.79 | 20.16 | 0.32 | 0.91 | 8.11    |
| <b>DIRAS1</b> |                                                           | DIRAS1 protein ratio    |       |       |      | ND   | #DIV/0! |
|               | R.VVVFAGGGVVGK.S [9, 19]                                  | DIRAS1 peptide ratio, 1 | ND    | ND    | ND   | ND   | ND      |
|               | R.DTYIPTIEDTYR.Q [33, 44]                                 | DIRAS1 peptide ratio, 2 | ND    | ND    | ND   | ND   | ND      |
|               | K.GSVEDIPVMLVGNK.C [108, 121]                             | DIRAS1 peptide ratio, 3 | ND    | ND    | ND   | ND   | ND      |
|               | R.EAQAVAQEWK.C [133, 142]                                 | DIRAS1 peptide ratio, 4 | ND    | ND    | ND   | ND   | ND      |
| <b>ARL2</b>   |                                                           | ARL2 protein ratio      |       |       |      | 1.10 | #DIV/0! |
|               | R.ELQSLLEVEER.L [104, 113]                                | ARL2 peptide ratio, 1   | 0.65  | 0.65  | 2.50 | 0.86 | 0.87    |
|               | R.LAGATLLIFANK.Q [114, 125]                               | ARL2 peptide ratio, 2   | 0.95  | 0.94  | 1.50 | 1.08 | 0.26    |
|               | R.EVLELDSIR.S [139, 147]                                  | ARL2 peptide ratio, 3   | 1.41  | 1.53  | 0.86 | 1.19 | 0.29    |
| <b>ARL3</b>   |                                                           | ARL3 protein ratio      |       |       |      | 0.66 | #DIV/0! |
|               | R.ILLLGLDNAGK.T [19, 29]                                  | ARL3 peptide ratio, 1   | 0.65  | 0.66  | 1.67 | 0.82 | 0.48    |
|               | K.QLASEDISHITPTQGFNIK.S [35, 53]                          | ARL3 peptide ratio, 2   | 0.64  | 0.92  | 0.95 | 0.81 | 0.14    |
|               | K.LSCVPVLIFANK.Q [115, 126]                               | ARL3 peptide ratio, 3   | 1.23  | 0.99  | 0.77 | 0.96 | 0.19    |
| <b>TRIM23</b> |                                                           | TRIM23 protein ratio    |       |       |      | 0.79 | #DIV/0! |
|               | R.DALLLIFANK.Q [504, 513]                                 | TRIM23 peptide ratio, 1 | 0.78  | 0.71  | 0.89 | 0.79 | 0.07    |
| <b>RALB</b>   |                                                           | RALB protein ratio      |       |       |      | 0.66 | #DIV/0! |
|               | K.GQSSLALHK.V [29, 37]                                    | RALB peptide ratio, 1   | 0.97  | 4.50  | 0.99 | 1.32 | 1.66    |
|               | R.QVPVEEAR.S [158, 165]                                   | RALB peptide ratio, 2   | 0.39  | 0.40  | 1.77 | 0.53 | 0.65    |
|               | K.AEEWGVQYVETSAK.T [168, 181]                             | RALB peptide ratio, 3   | 0.95  | 0.21  | 1.68 | 0.47 | 0.60    |
| <b>ARL15</b>  |                                                           | ARL15 protein ratio     |       |       |      | 0.51 | #DIV/0! |
|               | K.LCSESPDNVSTTGFSIK.A [51, 68]                            | ARL15 peptide ratio, 1  | 0.29  | 0.82  | 1.29 | 0.55 | 0.41    |
|               | K.AVPFQNAILNVK.E [69, 80]                                 | ARL15 peptide ratio, 2  | 0.49  | 0.30  | 0.52 | 0.41 | 0.10    |
|               | K.ELGGADNIR.K [81, 89]                                    | ARL15 peptide ratio, 3  | 0.30  | 0.45  | 0.44 | 0.38 | 0.07    |
|               | K.YFELEPLAR.G [157, 165]                                  | ARL15 peptide ratio, 4  | 0.38  | 0.32  | 0.89 | 0.44 | 0.25    |
|               | K.DSFSQLINLLEEK.D [184, 196]                              | ARL15 peptide ratio, 5  | ND    | ND    | ND   | ND   | ND      |
| <b>RAB1A</b>  |                                                           | RAB1A protein ratio     |       |       |      | 1.43 | #DIV/0! |
|               | R.GAHGIIVVYDVTQESFNNVK.Q [82, 91]                         | RAB1A peptide ratio, 1  | 1.64  | 2.80  | 0.83 | 1.38 | 0.81    |
|               | K.NATNVEQSFMTMAAEIK.K [156, 171]                          | RAB1A peptide ratio, 2  | 0.85  | 0.98  | 2.10 | 1.12 | 0.56    |
|               | R.MGPGATAGGAEK.S [175, 186]                               | RAB1A peptide ratio, 3  | 0.98  | 0.97  | 1.54 | 1.11 | 0.26    |
| <b>CDC42</b>  |                                                           | CDC42 protein ratio     |       |       |      | 1.31 | #DIV/0! |
| Isoform 1     | K.TCLLISYTTNK.F [16, 26]                                  | CDC42 peptide ratio, 1  | 0.78  | 0.76  | 1.15 | 0.87 | 0.18    |
| Isoform 1     | K.WVPEITHHCPK.T [96, 106]                                 | CDC42 peptide ratio, 2  | 0.59  | 0.55  | 1.02 | 0.67 | 0.21    |
| Isoform 1     | K.TPFLLVGTQIDLR.D [107, 119]                              | CDC42 peptide ratio, 3  | 0.51  | 0.50  | 1.61 | 0.65 | 0.52    |
| <b>RAB21</b>  |                                                           | RAB21 protein ratio     |       |       |      | 0.87 | #DIV/0! |
|               | K.VVLLGEGCVGK.T [21, 31]                                  | RAB21 peptide ratio, 1  | 0.52  | 1.28  | 0.94 | 0.79 | 0.31    |
|               | R.VNLAIWDTAGQER.F [67, 79]                                | RAB21 peptide ratio, 2  | 0.35  | 0.38  | 1.25 | 0.48 | 0.42    |
|               | R.HVSIQEAESYAESVGAK.H [140, 155]                          | RAB21 peptide ratio, 3  | 3.18  | 0.35  | 0.48 | 0.57 | 1.30    |
| <b>RAB22A</b> |                                                           | RAB22A protein ratio    |       |       |      | ND   | #DIV/0! |
|               | K.TVQYQNELHK.F [45, 54]                                   | RAB22A peptide ratio, 1 | ND    | ND    | ND   | ND   | ND      |
|               | K.EETFSTLK.N [89, 96]                                     | RAB22A peptide ratio, 2 | ND    | ND    | ND   | ND   | ND      |
|               | K.DYADSIHAIFVETSAK.N [134, 149]                           | RAB22A peptide ratio, 3 | ND    | ND    | ND   | ND   | ND      |
|               | R.IPSTDANLPSGGK.G [165, 177]                              | RAB22A peptide ratio, 4 | ND    | ND    | ND   | ND   | ND      |
| <b>RAB17</b>  |                                                           | RAB17 protein ratio     |       |       |      | 1.73 | #DIV/0! |
|               | K.SILPTVGC <sup>CA</sup> FFTK.V [45, 57]                  | RAB17 peptide ratio, 1  | 1.69  | 0.83  | 0.26 | 0.53 | 0.59    |
|               | K.LEIWDTAGQEK.Y [68, 78]                                  | RAB17 peptide ratio, 2  | 1.07  | 1.14  | 2.25 | 1.33 | 0.54    |
|               | K.YHSV <sup>CH</sup> LYFR.G [79, 88]                      | RAB17 peptide ratio, 3  | 0.57  | 2.07  | 0.48 | 0.69 | 0.73    |
|               | R.SDEEGQALR.G [183, 191]                                  | RAB17 peptide ratio, 4  | 1.92  | 6.18  | 0.59 | 1.27 | 2.38    |
| <b>RAB23</b>  |                                                           | RAB23 protein ratio     |       |       |      | 0.47 | #DIV/0! |
|               | K.TIGVDFLER.Q [40, 48]                                    | RAB23 peptide ratio, 1  | 0.28  | 0.26  | 0.57 | 0.33 | 0.14    |
|               | R.QIQVND <sup>ED</sup> VR.L [49, 58]                      | RAB23 peptide ratio, 2  | 0.45  | 0.43  | 0.69 | 0.50 | 0.12    |
|               | K.EDLNVNEVF <sup>K</sup> .Y [153, 162]                    | RAB23 peptide ratio, 3  | 0.29  | 1.12  | 0.80 | 0.54 | 0.34    |
| <b>RAB1B</b>  |                                                           | RAB1B protein ratio     |       |       |      | 0.78 | #DIV/0! |
|               | -.MNPEYDYLF <sup>K</sup> .L [0, 9]                        | RAB1B peptide ratio, 1  | 0.81  | 0.68  | 1.01 | 0.81 | 0.14    |
|               | K.NATNVEQAFMTMAAEIK.K [153, 168]                          | RAB1B peptide ratio, 2  | 0.48  | 0.57  | 1.72 | 0.68 | 0.57    |
|               | R.MGPGAASGG <sup>ER</sup> PNLK.I [172, 186]               | RAB1B peptide ratio, 3  | 1.38  | 1.19  | 1.08 | 1.20 | 0.12    |
| <b>RABL2B</b> |                                                           | RABL2B protein ratio    |       |       |      | 1.16 | #DIV/0! |
|               | K.AHAC <sup>IM</sup> VFDVQR.K [93, 104]                   | RABL2B peptide ratio, 1 | 1.08  | 1.20  | 1.22 | 1.16 | 0.06    |
| <b>RAP2C</b>  |                                                           | RAP2C protein ratio     |       |       |      | 0.45 | #DIV/0! |
|               | K.VPLILVGNK.V [108, 116]                                  | RAP2C peptide ratio, 1  | ND    | ND    | ND   | ND   | ND      |
|               | K.VDLEPER.E [117, 123]                                    | RAP2C peptide ratio, 2  | 0.28  | 0.41  | 0.97 | 0.43 | 0.30    |
|               | R.EVMSSEGR.A [124, 131]                                   | RAP2C peptide ratio, 3  | 0.90  | 0.96  | 0.51 | 0.73 | 0.20    |
|               | R.ALAQEWG <sup>CP</sup> PFMETS <sup>K</sup> .S [132, 147] | RAP2C peptide ratio, 4  | 0.72  | 13.99 | 1.36 | 1.37 | 6.11    |
|               | R.QMNYSSLPEK.Q [162, 171]                                 | RAP2C peptide ratio, 5  | 4.10  | 0.67  | 0.08 | 0.22 | 1.77    |
| <b>RHO</b>    |                                                           | RHO protein ratio       |       |       |      | ND   | #DIV/0! |

|               |                                   |                         |      |      |      |      |         |
|---------------|-----------------------------------|-------------------------|------|------|------|------|---------|
|               | K.CVLVGDGAVGK.T [51, 61]          | RHO peptide ratio, 1    | ND   | ND   | ND   | ND   | ND      |
| <b>RABL5</b>  |                                   | RABL5 protein ratio     |      |      |      | 1.11 | #DIV/0! |
|               | K.ILFVGPCEESGK.T [5, 15]          | RABL5 peptide ratio, 1  | 0.72 | 0.69 | 2.74 | 0.94 | 0.96    |
|               | R.ILEFENPHVTSNNK.G [39, 52]       | RABL5 peptide ratio, 2  | ND   | ND   | ND   | ND   | ND      |
|               | K.FESCWPALMK.D [69, 78]           | RABL5 peptide ratio, 3  | ND   | ND   | ND   | ND   | ND      |
|               | K.SIINSMSES.R.D [166, 175]        | RABL5 peptide ratio, 4  | 2.73 | 1.19 | 0.47 | 0.90 | 0.95    |
| <b>RRAGD</b>  |                                   | RRAGD protein ratio     |      |      |      | ND   | #DIV/0! |
|               | K.MSPNETLFLESTNK.I [85, 98]       | RRAGD peptide ratio, 1  | ND   | ND   | ND   | ND   | ND      |
|               | K.LNNTTVLYLK.E [320, 329]         | RRAGD peptide ratio, 2  | ND   | ND   | ND   | ND   | ND      |
| <b>ARL4C</b>  |                                   | ARL4C protein ratio     |      |      |      | ND   | #DIV/0! |
|               | K.GISCHFWDVGGQEK.L [60, 73]       | ARL4C peptide ratio, 1  | ND   | ND   | ND   | ND   | ND      |
|               | K.FAENQGTPLLVIANK.Q [113, 127]    | ARL4C peptide ratio, 2  | ND   | ND   | ND   | ND   | ND      |
|               | K.LYEMILK.R [174, 180]            | ARL4C peptide ratio, 3  | ND   | ND   | ND   | ND   | ND      |
| <b>RAC2</b>   |                                   | RAC2 protein ratio      |      |      |      | ND   | #DIV/0! |
|               | R.HHCPTPIILVGTK.L [102, 115]      | RAC2 peptide ratio, 1   | ND   | ND   | ND   | ND   | ND      |
|               | K.LAPITYPQGLALAK.E [133, 146]     | RAC2 peptide ratio, 2   | ND   | ND   | ND   | ND   | ND      |
|               | R.AVLCPQPTR.Q [174, 182]          | RAC2 peptide ratio, 3   | ND   | ND   | ND   | ND   | ND      |
| <b>RAC1</b>   |                                   | RAC1 protein ratio      |      |      |      | 1.03 | #DIV/0! |
|               | R.HHCPTPIILVGTK.L [102, 115]      | RAC1 peptide ratio, 1   | 0.81 | 0.83 | 2.04 | 1.02 | 0.57    |
|               | K.LTPITYPQGLAMAK.E [133, 146]     | RAC1 peptide ratio, 2   | 0.60 | 0.58 | 1.92 | 0.77 | 0.63    |
|               | K.LTPITYPQGLAMAK.E [133, 146]     | RAC1 peptide ratio, 3   | 0.64 | 0.57 | 2.17 | 0.79 | 0.74    |
| <b>RRAGB</b>  |                                   | RRAGB protein ratio     |      |      |      | 0.95 | #DIV/0! |
|               | R.SIIFANYIAR.D [57, 66]           | RRAGB peptide ratio, 1  | 0.84 | 0.88 | 1.72 | 1.03 | 0.41    |
|               | R.NFAEIIEADEVLLFER.A [253, 268]   | RRAGB peptide ratio, 2  | 0.87 | 0.85 | 0.81 | 0.84 | 0.02    |
|               | K.LAASFQSMEV.R.N [305, 315]       | RRAGB peptide ratio, 3  | 0.71 | 0.62 | 2.04 | 0.85 | 0.65    |
| <b>RAB27B</b> |                                   | RAB27B protein ratio    |      |      |      | ND   | #DIV/0! |
|               | K.LLALGDSGVGK.T [11, 21]          | RAB27B peptide ratio, 1 | ND   | ND   | ND   | ND   | ND      |
|               | R.VVYNAQGPNGSSGK.A [50, 63]       | RAB27B peptide ratio, 2 | ND   | ND   | ND   | ND   | ND      |
|               | K.VHLQLWDTAGQER.F [67, 79]        | RAB27B peptide ratio, 3 | ND   | ND   | ND   | ND   | ND      |
|               | K.YGIPYFETSAAATGQNVK.A [154, 168] | RAB27B peptide ratio, 4 | ND   | ND   | ND   | ND   | ND      |
| <b>RHOD</b>   |                                   | RHOD protein ratio      |      |      |      | ND   | #DIV/0! |
|               | K.GKPVHLHIWDTAGQDDYDR.L [61, 75]  | RHOD peptide ratio, 1   | ND   | ND   | ND   | ND   | ND      |
|               | R.WYPEVNHFCCK.K [110, 119]        | RHOD peptide ratio, 2   | ND   | ND   | ND   | ND   | ND      |
|               | R.SVGAVAYLECSAR.L [161, 173]      | RHOD peptide ratio, 3   | ND   | ND   | ND   | ND   | ND      |
| <b>RHOQ</b>   |                                   | RHOQ protein ratio      |      |      |      | ND   | #DIV/0! |
|               | K.EEWVPELK.E [100, 107]           | RHOQ peptide ratio, 1   | ND   | ND   | ND   | ND   | ND      |
|               | K.EIGACCYVECSALTQK.G [153, 168]   | RHOQ peptide ratio, 2   | ND   | ND   | ND   | ND   | ND      |
|               | K.TVFDEAIIAILTPK.K [172, 185]     | RHOQ peptide ratio, 3   | ND   | ND   | ND   | ND   | ND      |
| <b>RRAS2</b>  |                                   | RRAS2 protein ratio     |      |      |      | 0.40 | #DIV/0! |
|               | R.LVVVGGGGVGVK.S [16, 26]         | RRAS2 peptide ratio, 1  | 0.71 | 0.76 | 0.21 | 0.40 | 0.25    |
|               | R.LDILDTAGQEEFGAMR.E [69, 84]     | RRAS2 peptide ratio, 2  | 0.11 | 0.11 | 0.64 | 0.15 | 0.25    |
|               | R.TGEGFLLVFSVTD.R.G [90, 103]     | RRAS2 peptide ratio, 3  | ND   | ND   | ND   | ND   | ND      |
|               | R.QVTQEEGQQLAR.Q [141, 152]       | RRAS2 peptide ratio, 4  | 0.16 | 0.17 | 0.98 | 0.23 | 0.38    |
| <b>RAB31</b>  |                                   | RAB31 protein ratio     |      |      |      | 0.48 | #DIV/0! |
|               | R.FHSLAPMYR.G [67, 76]            | RAB31 peptide ratio, 1  | 0.37 | 0.42 | 1.08 | 0.50 | 0.32    |
|               | R.GSAAAVIVYDITK.Q [77, 89]        | RAB31 peptide ratio, 2  | 0.30 | 0.34 | 0.40 | 0.34 | 0.04    |
|               | K.QDSFYTLK.K [90, 97]             | RAB31 peptide ratio, 3  | 0.63 | 0.69 | 0.62 | 0.65 | 0.03    |
| <b>RAB32</b>  |                                   | RAB32 protein ratio     |      |      |      | 3.60 | #DIV/0! |
|               | K.VLVIGELGVGK.T [27, 37]          | RAB32 peptide ratio, 1  | 2.13 | 1.99 | 3.54 | 2.39 | 0.70    |
|               | R.SSTFEAVLK.W [110, 118]          | RAB32 peptide ratio, 2  | 1.94 | 1.95 | 3.69 | 2.31 | 0.82    |
|               | K.DNINIEEAAR.F [176, 185]         | RAB32 peptide ratio, 3  | 2.06 | 2.13 | 4.01 | 2.49 | 0.90    |
| <b>RAB18</b>  |                                   | RAB18 protein ratio     |      |      |      | 1.39 | #DIV/0! |
|               | K.ILIIGESGVGK.S [10, 20]          | RAB18 peptide ratio, 1  | 0.81 | 0.78 | 1.49 | 0.94 | 0.33    |
|               | K.LAIWDTAGQER.F [58, 68]          | RAB18 peptide ratio, 2  | 0.55 | 0.49 | 1.69 | 0.67 | 0.55    |
|               | R.TLTPSYR.G [71, 78]              | RAB18 peptide ratio, 3  | 0.81 | 0.79 | 1.29 | 0.91 | 0.23    |
|               | R.NDIVNMLVGNK.I [112, 122]        | RAB18 peptide ratio, 4  | 0.83 | 0.81 | 1.50 | 0.97 | 0.32    |
| <b>RAB9B</b>  |                                   | RAB9B protein ratio     |      |      |      | 3.34 | #DIV/0! |
|               | K.VILLGDGGVGVK.S [9, 19]          | RAB9B peptide ratio, 1  | 2.00 | 1.96 | 3.12 | 2.25 | 0.54    |
|               | R.QSFENLGNWQK.E [92, 102]         | RAB9B peptide ratio, 2  | 1.55 | 1.17 | 3.54 | 1.68 | 1.04    |
|               | K.EFIYADV.K.D [103, 111]          | RAB9B peptide ratio, 3  | 1.44 | 1.57 | 2.45 | 1.72 | 0.45    |
| <b>RAP1B</b>  |                                   | RAP1B protein ratio     |      |      |      | 0.48 | #DIV/0! |
|               | K.DTDDVPMILVGNK.C [104, 116]      | RAP1B peptide ratio, 1  | 0.39 | 0.29 | 1.17 | 0.44 | 0.39    |
|               | K.DTDDVPMILVGNK.C [104, 116]      | RAP1B peptide ratio, 2  | 0.40 | 0.36 | 0.70 | 0.45 | 0.15    |
|               | R.QWNNCAFLESSAK.S [136, 148]      | RAP1B peptide ratio, 3  | 0.28 | 0.29 | 0.80 | 0.36 | 0.24    |
| <b>ARFRP1</b> |                                   | ARFRP1 protein ratio    |      |      |      | 0.79 | #DIV/0! |
|               | K.TTFLEQSK.T [30, 37]             | ARFRP1 peptide ratio, 1 | 0.58 | 0.78 | 1.34 | 0.80 | 0.32    |
|               | K.ITTTVGLNIGTVDVGK.A [52, 67]     | ARFRP1 peptide ratio, 2 | ND   | ND   | ND   | ND   | ND      |
|               | K.QDVETCLSIDIK.T [135, 147]       | ARFRP1 peptide ratio, 3 | ND   | ND   | ND   | ND   | ND      |
|               | K.TAFSDCTSK.I [148, 156]          | ARFRP1 peptide ratio, 4 | 0.75 | 2.04 | 1.09 | 1.09 | 0.55    |
|               | R.DCLTQACQSALTGK.G [161, 173]     | ARFRP1 peptide ratio, 5 | 0.55 | 0.65 | 2.01 | 0.78 | 0.66    |
| <b>RAB20</b>  |                                   | RAB20 protein ratio     |      |      |      | ND   | #DIV/0! |
|               | K.IVLLGDMNVGK.T [7, 17]           | RAB20 peptide ratio, 1  | ND   | ND   | ND   | ND   | ND      |
|               | R.GAAAILTYDVNHR.Q [71, 84]        | RAB20 peptide ratio, 2  | ND   | ND   | ND   | ND   | ND      |
|               | R.FLGLTDTASK.D [94, 103]          | RAB20 peptide ratio, 3  | ND   | ND   | ND   | ND   | ND      |

|               |                                  |                         |      |      |       |      |         |
|---------------|----------------------------------|-------------------------|------|------|-------|------|---------|
|               | K.QVQLEDAVALYK.K [147, 158]      | RAB20 peptide ratio, 4  | ND   | ND   | ND    | ND   | ND      |
| <b>SAR1A</b>  |                                  | SAR1A protein ratio     |      |      |       | 0.85 | #DIV/0! |
|               | K.NYLPAINGIVFLVDCADHSR.L [87, 1  | SAR1A peptide ratio, 1  | 0.86 | 1.01 | 0.98  | 0.95 | 0.06    |
|               | R.TDAISEEK.L [138, 145]          | SAR1A peptide ratio, 2  | ND   | ND   | ND    | ND   | ND      |
|               | R.EIFGLYGQTTGK.G [148, 159]      | SAR1A peptide ratio, 3  | ND   | ND   | ND    | ND   | ND      |
| <b>RAB5C</b>  |                                  | RAB5C protein ratio     |      |      |       | 1.52 | #DIV/0! |
|               | R.QASPNIVIALAGNK.A [121, 134]    | RAB5C peptide ratio, 1  | 0.91 | 0.87 | 2.14  | 1.10 | 0.59    |
|               | K.NEPQNATGAPGR.N [184, 195]      | RAB5C peptide ratio, 2  | 1.17 | 0.68 | 2.32  | 1.09 | 0.68    |
|               | R.GVDLQENNPASR.S [198, 209]      | RAB5C peptide ratio, 3  | 0.75 | 0.71 | 2.62  | 0.96 | 0.89    |
| <b>RAB7A</b>  |                                  | RAB7A protein ratio     |      |      |       | 3.46 | #DIV/0! |
|               | R.FQSLGVAFYR.G [69, 78]          | RAB7A peptide ratio, 1  | 2.07 | 2.08 | 4.04  | 2.48 | 0.92    |
|               | R.DEFLIQASPR.D [103, 112]        | RAB7A peptide ratio, 2  | 2.06 | 1.99 | 3.76  | 2.39 | 0.82    |
|               | R.AQAWCYSK.N [138, 145]          | RAB7A peptide ratio, 3  | 1.89 | 1.92 | 4.28  | 2.34 | 1.12    |
|               | K.NNIPYFETSARK.E [146, 156]      | RAB7A peptide ratio, 4  | 1.28 | 1.20 | 5.54  | 1.67 | 2.03    |
| <b>RAB9A</b>  |                                  | RAB9A protein ratio     |      |      |       | 1.72 | #DIV/0! |
|               | R.QVSTEEAQAWCR.D [131, 142]      | RAB9A peptide ratio, 1  | 1.02 | 1.00 | 4.82  | 1.37 | 1.79    |
|               | K.DATNVAAAFEEAVR.R [156, 169]    | RAB9A peptide ratio, 2  | 1.07 | 0.94 | 3.75  | 1.32 | 1.30    |
|               | R.SDHLIQTDTVNLHR.K [178, 191]    | RAB9A peptide ratio, 3  | 3.32 | 1.66 | 2.90  | 2.40 | 0.70    |
| <b>RAB13</b>  |                                  | RAB13 protein ratio     |      |      |       | 1.80 | #DIV/0! |
|               | K.LQVWDTAGQER.F [58, 68]         | RAB13 peptide ratio, 1  | ND   | ND   | ND    | ND   | ND      |
|               | K.SFENIQNWMK.S [94, 103]         | RAB13 peptide ratio, 2  | 1.95 | 2.01 | 10.77 | 2.72 | 4.14    |
|               | K.ENASAGVER.L [107, 115]         | RAB13 peptide ratio, 3  | 1.11 | 1.75 | 3.32  | 1.69 | 0.93    |
| <b>RAB28</b>  |                                  | RAB28 protein ratio     |      |      |       | 0.25 | #DIV/0! |
|               | K.IVVLGDGASGK.T [14, 24]         | RAB28 peptide ratio, 1  | 0.27 | 0.96 | 4.62  | 0.60 | 1.91    |
|               | K.TSLTTCFAQETFGK.Q [25, 38]      | RAB28 peptide ratio, 2  | 0.37 | 0.28 | 2.54  | 0.45 | 1.05    |
|               | K.VSEESQPLVALVGNK.I [113, 129]   | RAB28 peptide ratio, 3  | ND   | ND   | ND    | ND   | ND      |
|               | K.VAAEILGIK.L [172, 180]         | RAB28 peptide ratio, 4  | ND   | ND   | ND    | ND   | ND      |
|               | K.AEIEQSQR.V [184, 191]          | RAB28 peptide ratio, 5  | 0.86 | 0.33 | 0.16  | 0.29 | 0.30    |
| <b>RAB27A</b> |                                  | RAB27A protein ratio    |      |      |       | 8.49 | #DIV/0! |
|               | K.FLALGDSGVGK.T [11, 21]         | RAB27A peptide ratio, 1 | 5.13 | 5.31 | 12.63 | 6.49 | 3.50    |
|               | K.TSVLYQYTDGK.F [22, 32]         | RAB27A peptide ratio, 2 | 4.57 | 5.10 | 10.70 | 5.91 | 2.77    |
|               | R.IHLQLWDTAGQER.F [67, 79]       | RAB27A peptide ratio, 3 | ND   | ND   | ND    | ND   | ND      |
|               | K.SDLEDQR.V [134, 140]           | RAB27A peptide ratio, 4 | 3.49 | 4.95 | 0.70  | 1.56 | 1.76    |
|               | K.SWIPEGVVR.S [191, 199]         | RAB27A peptide ratio, 5 | 4.73 | 4.92 | 13.28 | 6.12 | 3.99    |
| <b>RAB10</b>  |                                  | RAB10 protein ratio     |      |      |       | 1.67 | #DIV/0! |
|               | K.TYDLLFK.L [4, 10]              | RAB10 peptide ratio, 1  | 1.01 | 0.94 | 1.36  | 1.07 | 0.19    |
|               | R.FHTITTSYYR.G [70, 79]          | RAB10 peptide ratio, 2  | 0.98 | 0.95 | 1.35  | 1.07 | 0.18    |
|               | R.NIDEHANEDVER.M [105, 116]      | RAB10 peptide ratio, 3  | 1.19 | 0.51 | 1.59  | 0.87 | 0.45    |
| <b>RHEB</b>   |                                  | RHEB protein ratio      |      |      |       | 1.56 | #DIV/0! |
|               | K.IAILGYR.S [8, 14]              | RHEB peptide ratio, 1   | 0.95 | 0.74 | 0.15  | 0.33 | 0.34    |
|               | K.VQIPIMLVGNK.K [109, 119]       | RHEB peptide ratio, 2   | 0.94 | 1.10 | 2.73  | 1.28 | 0.81    |
|               | K.ALAESWNAAFLESSAK.E [135, 150]  | RHEB peptide ratio, 3   | 0.75 | 0.72 | 2.22  | 0.95 | 0.70    |
|               | K.ENQTAVDVFR.R [151, 160]        | RHEB peptide ratio, 4   | 0.80 | 0.81 | 2.10  | 1.02 | 0.61    |
| <b>CDC42</b>  |                                  | CDC42 protein ratio     |      |      |       | 0.93 | #DIV/0! |
| Isoform 2     | K.YVECSALTQK.G [153, 162]        | CDC42 peptide ratio, 1  | 0.56 | 0.56 | 1.24  | 0.68 | 0.32    |
| Isoform 2     | K.NVFDEAILAALPEPEPK.K [166, 182] | CDC42 peptide ratio, 2  | 0.74 | 0.85 | 1.02  | 0.86 | 0.11    |
| <b>RAB6B</b>  |                                  | RAB6B protein ratio     |      |      |       | 1.45 | #DIV/0! |
|               | R.QITIEEGEQR.A [134, 143]        | RAB6B peptide ratio, 1  | ND   | ND   | ND    | ND   | ND      |
|               | K.ELSVMFIETSAK.T [146, 157]      | RAB6B peptide ratio, 2  | 1.52 | 1.18 | 2.68  | 1.60 | 0.64    |
|               | R.VASALPGMENVQEK.S [169, 182]    | RAB6B peptide ratio, 3  | 1.03 | 1.07 | 1.05  | 1.05 | 0.01    |
|               | R.VASALPGMENVQEK.S [169, 182]    | RAB6B peptide ratio, 4  | ND   | ND   | ND    | ND   | ND      |
| <b>RHOG</b>   |                                  | RHOG protein ratio      |      |      |       | 0.63 | #DIV/0! |
|               | R.TVNLNLWDTAGQEEYDR.L [49, 65]   | RHOG peptide ratio, 1   | 0.37 | 0.41 | 1.30  | 0.51 | 0.43    |
|               | K.EQGQAPITPQQGQALAK.Q [130, 14   | RHOG peptide ratio, 2   | 0.17 | 0.19 | 3.40  | 0.26 | 1.52    |
|               | R.YLECSALQQDGVK.E [153, 165]     | RHOG peptide ratio, 3   | 0.40 | 0.31 | 1.37  | 0.47 | 0.48    |
| <b>RAB5B</b>  |                                  | RAB5B protein ratio     |      |      |       | 1.54 | #DIV/0! |
|               | R.QASPSIVIALAGNK.A [120, 133]    | RAB5B peptide ratio, 1  | 0.78 | 0.69 | 1.79  | 0.91 | 0.50    |
|               | K.TAMNVNDLFLAIK.K [165, 178]     | RAB5B peptide ratio, 2  | 0.91 | 0.88 | 1.69  | 1.06 | 0.38    |
|               | K.SEPQNLGGAAGR.S [183, 194]      | RAB5B peptide ratio, 3  | 0.98 | 0.92 | 1.65  | 1.11 | 0.33    |
|               | R.GVDLHEQSQQNK.S [197, 208]      | RAB5B peptide ratio, 4  | ND   | ND   | ND    | ND   | ND      |
| <b>RAP2B</b>  |                                  | RAP2B protein ratio     |      |      |       | 1.43 | #DIV/0! |
|               | R.VPMILVGNK.V [108, 116]         | RAP2B peptide ratio, 1  | ND   | ND   | ND    | ND   | ND      |
|               | R.VPMILVGNK.V [108, 116]         | RAP2B peptide ratio, 2  | 0.46 | 0.51 | 3.22  | 0.67 | 1.29    |
|               | K.VDLEGER.E [117, 123]           | RAP2B peptide ratio, 3  | ND   | ND   | ND    | ND   | ND      |
|               | K.ASVDELFAEIVR.Q [150, 161]      | RAP2B peptide ratio, 4  | 0.77 | 0.78 | 3.25  | 1.04 | 1.16    |
| <b>ARL8B</b>  |                                  | ARL8B protein ratio     |      |      |       | 1.72 | #DIV/0! |
|               | R.DLPNALDEK.Q [184, 192]         | ARL8B peptide ratio, 1  | 0.86 | 0.97 | 3.04  | 1.19 | 1.00    |
|               | K.MNLSAIQDR.E [198, 206]         | ARL8B peptide ratio, 2  | 1.09 | 1.06 | 2.98  | 1.36 | 0.90    |
|               | R.EICCYSSICK.E [207, 216]        | ARL8B peptide ratio, 3  | 1.44 | 1.39 | 2.62  | 1.67 | 0.57    |
| <b>RHOH</b>   |                                  | RHOH protein ratio      |      |      |       | ND   | #DIV/0! |
|               | R.SNLPCTPVLVVATQTDQR.E [103, 1   | RHOH peptide ratio, 1   | ND   | ND   | ND    | ND   | ND      |
|               | R.ASCVNAMEGK.K [127, 136]        | RHOH peptide ratio, 2   | ND   | ND   | ND    | ND   | ND      |
|               | K.GYLECSALSNR.G [146, 156]       | RHOH peptide ratio, 3   | ND   | ND   | ND    | ND   | ND      |
|               | R.GVQQVFECAVR.T [157, 167]       | RHOH peptide ratio, 4   | ND   | ND   | ND    | ND   | ND      |

|                |                                   |                          |       |       |       |       |         |
|----------------|-----------------------------------|--------------------------|-------|-------|-------|-------|---------|
| <b>RAP1A</b>   |                                   | RAP1A protein ratio      |       |       |       | 1.59  | #DIV/0! |
|                | R.VKDTEDEVPMILVGNK.C [102, 116]   | RAP1A peptide ratio, 1   | 0.76  | 0.35  | 1.66  | 0.63  | 0.55    |
|                | R.VKDTEDEVPMILVGNK.C [102, 116]   | RAP1A peptide ratio, 2   | 2.25  | 2.66  | 2.21  | 2.36  | 0.20    |
|                | K.DTEDVPMILVGNK.C [104, 116]      | RAP1A peptide ratio, 3   | 2.03  | 0.80  | 2.85  | 1.43  | 0.85    |
|                | R.QWCNCAFLESSAK.S [136, 148]      | RAP1A peptide ratio, 4   | 0.95  | 1.00  | 2.69  | 1.24  | 0.81    |
| <b>RAP2A</b>   |                                   | RAP2A protein ratio      |       |       |       | 1.18  | #DIV/0! |
|                | K.VPVILVGNK.V [108, 116]          | RAP2A peptide ratio, 1   | 5.21  | 5.20  | 0.20  | 0.56  | 2.36    |
|                | R.ALAEWGWCPFMETSAK.S [132, 147]   | RAP2A peptide ratio, 2   | 1.25  | 3.45  | 3.46  | 2.17  | 1.04    |
|                | K.TMVDELFAEIVR.Q [150, 161]       | RAP2A peptide ratio, 3   | 0.60  | 0.74  | 1.41  | 0.81  | 0.35    |
| <b>RRAS</b>    |                                   | RRAS protein ratio       |       |       |       | 0.20  | #DIV/0! |
|                | K.ICSVDGIPAR.L [68, 77]           | RRAS peptide ratio, 1    | 0.12  | 0.12  | 0.43  | 0.16  | 0.14    |
|                | R.QSFNEVGK.L [113, 120]           | RRAS peptide ratio, 2    | 0.14  | 0.17  | 1.60  | 0.22  | 0.68    |
|                | K.LFTQILR.V [121, 127]            | RRAS peptide ratio, 3    | 0.49  | 8.21  | 0.11  | 0.26  | 3.73    |
|                | K.ADLESQR.Q [143, 149]            | RRAS peptide ratio, 4    | ND    | ND    | ND    | ND    | ND      |
| <b>RAB11B</b>  |                                   | RAB11B protein ratio     |       |       |       | 1.48  | #DIV/0! |
|                | K.AQIWDTAGQERY.Y [61, 71]         | RAB11B peptide ratio, 1  | 0.69  | 0.66  | 2.71  | 0.90  | 0.96    |
|                | R.GAVGALLVYDIAKH.H [82, 94]       | RAB11B peptide ratio, 2  | 1.05  | 1.01  | 1.96  | 1.22  | 0.44    |
|                | K.NILTEIYR.I [166, 173]           | RAB11B peptide ratio, 3  | 0.88  | 0.85  | 1.64  | 1.03  | 0.36    |
| <b>NKIRAS2</b> |                                   | NKIRAS2 protein ratio    |       |       |       | 0.99  | #DIV/0! |
|                | K.VVVCQGQASVKG.T [6, 16]          | NKIRAS2 peptide ratio, 1 | 0.59  | 1.16  | 1.08  | 0.87  | 0.25    |
|                | K.EVTIVVLGNK.C [111, 120]         | NKIRAS2 peptide ratio, 2 | 0.29  | 0.87  | 5.40  | 0.63  | 2.28    |
|                | R.VDPDVAQHWAK.S [129, 139]        | NKIRAS2 peptide ratio, 3 | 3.86  | 0.47  | 1.18  | 0.92  | 1.46    |
|                | R.SLLEPFVYLASK.M [155, 166]       | NKIRAS2 peptide ratio, 4 | 0.59  | 0.55  | 1.73  | 0.73  | 0.55    |
| <b>RAB33B</b>  |                                   | RAB33B protein ratio     |       |       |       | 3.55  | #DIV/0! |
|                | K.IIVIGDSNVGK.T [35, 45]          | RAB33B peptide ratio, 1  | 2.32  | 1.73  | 1.72  | 1.88  | 0.28    |
|                | R.AVEIDGER.I [73, 80]             | RAB33B peptide ratio, 2  | 0.37  | 1.35  | 1.38  | 0.71  | 0.47    |
|                | R.SAIQVPTDLAQK.F [153, 164]       | RAB33B peptide ratio, 3  | 0.66  | 0.75  | 3.00  | 0.94  | 1.08    |
| <b>ARL6</b>    |                                   | ARL6 protein ratio       |       |       |       | 1.16  | #DIV/0! |
|                | R.NLWEHYK.E [77, 84]              | ARL6 peptide ratio, 1    | 5.78  | 0.49  | 0.73  | 0.84  | 2.44    |
|                | K.EELDTLLNHPDIKH.H [106, 118]     | ARL6 peptide ratio, 2    | ND    | ND    | ND    | ND    | ND      |
|                | R.IPILFFANK.M [122, 130]          | ARL6 peptide ratio, 3    | 0.69  | 0.64  | 2.44  | 0.88  | 0.84    |
|                | K.VSQLLCLENIK.D [142, 152]        | ARL6 peptide ratio, 4    | ND    | ND    | ND    | ND    | ND      |
| <b>RAC3</b>    |                                   | RAC3 protein ratio       |       |       |       | 1.27  | #DIV/0! |
|                | K.LAPITYPQGLAMARE.E [133, 146]    | RAC3 peptide ratio, 1    | 1.46  | 0.82  | 1.64  | 1.19  | 0.35    |
|                | K.LAPITYPQGLAMARE.E [133, 146]    | RAC3 peptide ratio, 2    | 1.41  | 1.41  | 1.34  | 1.39  | 0.03    |
|                | R.AVLCPPPVK.K [174, 182]          | RAC3 peptide ratio, 3    | 0.76  | 0.75  | 1.66  | 0.92  | 0.43    |
| <b>RAB3A</b>   |                                   | RAB3A protein ratio      |       |       |       | 3.58  | #DIV/0! |
|                | K.ESSDQNFDMFK.I [12, 23]          | RAB3A peptide ratio, 1   | 5.52  | 0.20  | 0.15  | 0.25  | 2.52    |
|                | K.TYSWDNAQVLLVGNK.C [121, 135]    | RAB3A peptide ratio, 2   | 0.42  | 0.35  | 0.95  | 0.48  | 0.27    |
|                | R.LVDVICEK.M [178, 185]           | RAB3A peptide ratio, 3   | 1.67  | 1.24  | 3.26  | 1.75  | 0.87    |
|                | K.MSESLDTADPAVTGAK.Q [186, 201]   | RAB3A peptide ratio, 4   | 2.93  | 1.91  | 1.36  | 1.87  | 0.65    |
| <b>RAB5A</b>   |                                   | RAB5A protein ratio      |       |       |       | 1.30  | #DIV/0! |
|                | R.QASPNIVIALSGNKA.A [120, 133]    | RAB5A peptide ratio, 1   | 1.23  | 0.86  | 1.96  | 1.21  | 0.45    |
|                | K.NEPQNPANSAR.G [183, 194]        | RAB5A peptide ratio, 2   | 0.92  | 2.35  | 5.94  | 1.78  | 2.11    |
|                | R.GVDLTEPTQPTR.N [197, 208]       | RAB5A peptide ratio, 3   | 0.78  | 0.77  | 3.00  | 1.03  | 1.05    |
| <b>RAB6C</b>   |                                   | RAB6C protein ratio      |       |       |       | 0.86  | #DIV/0! |
|                | R.QVSIEEGER.K [134, 142]          | RAB6C peptide ratio, 1   | 0.89  | 0.88  | 0.82  | 0.86  | 0.03    |
|                | K.ELNVMFIETSAK.A [146, 157]       | RAB6C peptide ratio, 2   | ND    | ND    | ND    | ND    | ND      |
|                | R.VAAALPGMESTQDR.S [169, 182]     | RAB6C peptide ratio, 3   | ND    | ND    | ND    | ND    | ND      |
| <b>MRAS</b>    |                                   | MRAS protein ratio       |       |       |       | ND    | #DIV/0! |
|                | K.IFVPDYDPTIEDSYLKH.H [36, 51]    | MRAS peptide ratio, 1    | ND    | ND    | ND    | ND    | ND      |
| <b>RAB8B</b>   |                                   | RAB8B protein ratio      |       |       |       | 1.15  | #DIV/0! |
|                | R.NIEEHASSDVER.M [104, 115]       | RAB8B peptide ratio, 1   | 0.52  | 0.31  | 3.65  | 0.56  | 1.53    |
|                | K.SSANVEEAFFTLAR.D [153, 166]     | RAB8B peptide ratio, 2   | 0.69  | 0.70  | 1.82  | 0.87  | 0.53    |
|                | K.MNDSNSAGAGGPVK.I [176, 189]     | RAB8B peptide ratio, 3   | ND    | ND    | ND    | ND    | ND      |
|                | K.MNDSNSAGAGGPVK.I [176, 189]     | RAB8B peptide ratio, 4   | ND    | ND    | ND    | ND    | ND      |
| <b>RAB7L1</b>  |                                   | RAB7L1 protein ratio     |       |       |       | 3.68  | #DIV/0! |
|                | K.VLQWSDYEIVR.L [47, 57]          | RAB7L1 peptide ratio, 1  | 0.88  | 0.66  | 2.48  | 0.98  | 0.81    |
|                | K.CDLSPWAVSR.D [126, 135]         | RAB7L1 peptide ratio, 2  | 2.10  | 2.53  | 3.95  | 2.67  | 0.79    |
|                | K.ENGFTGWTETSVK.E [144, 156]      | RAB7L1 peptide ratio, 3  | 0.52  | 0.26  | 5.80  | 0.51  | 2.55    |
| <b>RHOC</b>    |                                   | RHOC protein ratio       |       |       |       | 1.09  | #DIV/0! |
|                | K.HFCPNVPIILVGNK.K [104, 117]     | RHOC peptide ratio, 1    | 0.85  | 0.90  | 1.20  | 0.96  | 0.15    |
|                | K.HFCPNVPIILVGNKK.D [104, 118] (n | RHOC peptide ratio, 2    | 0.70  | 0.67  | 1.19  | 0.80  | 0.24    |
|                | R.ISAFGYLECSAK.T [150, 161]       | RHOC peptide ratio, 3    | 0.66  | 0.64  | 1.09  | 0.75  | 0.21    |
| <b>RHOJ</b>    |                                   | RHOJ protein ratio       |       |       |       | ND    | #DIV/0! |
|                | K.AIGAQCYLECSALTQKG.G [165, 180]  | RHOJ peptide ratio, 1    | ND    | ND    | ND    | ND    | ND      |
|                | K.AVFDEAILTIFHPK.K [184, 197]     | RHOJ peptide ratio, 2    | ND    | ND    | ND    | ND    | ND      |
| <b>RAB38</b>   |                                   | RAB38 protein ratio      |       |       |       | 50.38 | #DIV/0! |
|                | K.LLVIGDLGVGK.T [11, 21]          | RAB38 peptide ratio, 1   | 31.25 | 23.42 | 51.24 | 31.84 | 11.71   |
|                | K.VLHWDPETVVR.L [49, 59]          | RAB38 peptide ratio, 2   | ND    | ND    | ND    | ND    | ND      |
|                | K.LSLPNGKPVSVLLANK.C [111, 127]   | RAB38 peptide ratio, 3   | 12.66 | 9.46  | 9.18  | 10.22 | 1.58    |
|                | K.ENINIDEASR.C [161, 170]         | RAB38 peptide ratio, 4   | 18.94 | 18.52 | 11.35 | 15.39 | 3.48    |
| <b>RAB25</b>   |                                   | RAB25 protein ratio      |       |       |       | ND    | #DIV/0! |
|                | K.VVLIGESGVGK.T [14, 24]          | RAB25 peptide ratio, 1   | ND    | ND    | ND    | ND    | ND      |

|               |                                     |                         |      |      |      |      |         |
|---------------|-------------------------------------|-------------------------|------|------|------|------|---------|
|               | R.TTIGVEFSTR.T [42, 51]             | RAB25 peptide ratio, 2  | ND   | ND   | ND   | ND   | ND      |
|               | K.AQIWDTAGLER.Y [62, 72]            | RAB25 peptide ratio, 3  | ND   | ND   | ND   | ND   | ND      |
|               | R.EVPTEEAR.M [133, 140]             | RAB25 peptide ratio, 4  | ND   | ND   | ND   | ND   | ND      |
| <b>RAB8A</b>  |                                     | RAB8A protein ratio     |      |      |      | 1.29 | #DIV/0! |
|               | R.NIEEHASADVEK.M [104, 115]         | RAB8A peptide ratio, 1  | 0.40 | 0.34 | 2.38 | 0.51 | 0.95    |
|               | K.LALDYGIK.F [138, 145]             | RAB8A peptide ratio, 2  | 0.80 | 0.72 | 1.22 | 0.87 | 0.22    |
|               | K.LEGNPQGSNQGVI.I [176, 189]        | RAB8A peptide ratio, 3  | 0.42 | 0.35 | 1.58 | 0.51 | 0.56    |
| <b>ARL4A</b>  |                                     | ARL4A protein ratio     |      |      |      | ND   | #DIV/0! |
|               | K.TVTFHFWDVGGQEK.L [67, 80]         | ARL4A peptide ratio, 1  | ND   | ND   | ND   | ND   | ND      |
|               | R.ISENQGVPLIVANK.Q [120, 134]       | ARL4A peptide ratio, 2  | ND   | ND   | ND   | ND   | ND      |
|               | R.NLSLSLSEIEK.L [139, 148]          | ARL4A peptide ratio, 3  | ND   | ND   | ND   | ND   | ND      |
| <b>RAB6A</b>  |                                     | RAB6A protein ratio     |      |      |      | 0.88 | #DIV/0! |
|               | R.DSAAAVVYDITNVNSFQQTTK.W           | RAB6A peptide ratio, 1  | 0.57 | 0.45 | 2.09 | 0.67 | 0.75    |
|               | K.WIDDVTER.G [106, 114] (missed 1)  | RAB6A peptide ratio, 2  | ND   | ND   | ND   | ND   | ND      |
|               | R.TDLADKR.Q [127, 133] (missed 1)   | RAB6A peptide ratio, 3  | 0.79 | 0.54 | 1.95 | 0.83 | 0.61    |
| <b>RAB2A</b>  |                                     | RAB2A protein ratio     |      |      |      | 1.75 | #DIV/0! |
|               | R.MITIDGK.Q [46, 52]                | RAB2A peptide ratio, 1  | 1.05 | 1.05 | 1.11 | 1.07 | 0.03    |
|               | K.KEEGEAFAR.E [130, 138] (missed 1) | RAB2A peptide ratio, 2  | 0.64 | 0.62 | 2.10 | 0.82 | 0.70    |
|               | K.TASNVEEAFINTAK.E [151, 164]       | RAB2A peptide ratio, 3  | 0.79 | 0.75 | 1.80 | 0.95 | 0.49    |
|               | K.IQEGVFDINNEANGIK.I [170, 185]     | RAB2A peptide ratio, 4  | 0.63 | 0.72 | 1.97 | 0.86 | 0.61    |
| <b>RAB3D</b>  |                                     | RAB3D protein ratio     |      |      |      | 7.09 | #DIV/0! |
|               | R.DAADQNFDYMFK.L [12, 23]           | RAB3D peptide ratio, 1  | 0.26 | 1.49 | 0.74 | 0.52 | 0.51    |
|               | K.LLLIGNSSVGK.T [24, 34]            | RAB3D peptide ratio, 2  | 0.13 | 0.15 | 3.66 | 0.20 | 1.66    |
|               | R.LADDLGFEFFEASAK.E [152, 166]      | RAB3D peptide ratio, 3  | 1.22 | 1.16 | 3.37 | 1.52 | 1.03    |
| <b>RAB36</b>  |                                     | RAB36 protein ratio     |      |      |      | ND   | #DIV/0! |
|               | R.EHFHGQVSAACQR.R [100, 112]        | RAB36 peptide ratio, 1  | ND   | ND   | ND   | ND   | ND      |
|               | R.FEAGIPYSLQIWDTAGQEK.F [164, 177]  | RAB36 peptide ratio, 2  | ND   | ND   | ND   | ND   | ND      |
|               | R.VAALAFEQSVLQDLER.Q [282, 297]     | RAB36 peptide ratio, 3  | ND   | ND   | ND   | ND   | ND      |
| <b>RAN</b>    |                                     | RAN protein ratio       |      |      |      | 1.60 | #DIV/0! |
|               | K.LVLVGDGGTGK.T [12, 22]            | RAN peptide ratio, 1    | 1.63 | 0.96 | 3.70 | 1.55 | 1.17    |
|               | K.YVATLGVEVHPLVFHTNR.G [38, 55]     | RAN peptide ratio, 2    | 1.66 | 1.87 | 2.82 | 2.01 | 0.51    |
|               | K.NVPNWHR.D [99, 105]               | RAN peptide ratio, 3    | 0.99 | 0.99 | 1.81 | 1.17 | 0.39    |
| <b>RAB40C</b> |                                     | RAB40C protein ratio    |      |      |      | ND   | #DIV/0! |
|               | R.VFSLQDLCCR.A [188, 197]           | RAB40C peptide ratio, 1 | ND   | ND   | ND   | ND   | ND      |
|               | R.SYSLASGAGGGGSK.G [239, 252]       | RAB40C peptide ratio, 2 | ND   | ND   | ND   | ND   | ND      |
| <b>ARL11</b>  |                                     | ARL11 protein ratio     |      |      |      | ND   | #DIV/0! |
|               | R.GCSALTGEGLEALQSLWSLLK.S           | ARL11 peptide ratio, 1  | ND   | ND   | ND   | ND   | ND      |
| <b>RAB24</b>  |                                     | RAB24 protein ratio     |      |      |      | 1.28 | #DIV/0! |
|               | R.SLEEGCQIYLCGTK.S [107, 120]       | RAB24 peptide ratio, 1  | 0.78 | 0.74 | 2.63 | 1.00 | 0.88    |
|               | R.VDFHDVQDYADNIK.A [133, 146]       | RAB24 peptide ratio, 2  | 2.78 | 1.04 | 0.75 | 1.13 | 0.89    |
|               | K.AQLFETSSK.T [147, 155]            | RAB24 peptide ratio, 3  | 0.74 | 0.83 | 2.28 | 1.00 | 0.70    |
|               | K.TGQSVDELQK.V [156, 166]           | RAB24 peptide ratio, 4  | 0.81 | 0.69 | 1.79 | 0.92 | 0.49    |
| <b>RAB7B</b>  |                                     | RAB7B protein ratio     |      |      |      | ND   | #DIV/0! |
|               | K.IIILGDTTLK.L [48, 57]             | RAB7B peptide ratio, 1  | ND   | ND   | ND   | ND   | ND      |
|               | K.LQIWDTGGQER.F [58, 68]            | RAB7B peptide ratio, 2  | ND   | ND   | ND   | ND   | ND      |
|               | R.YQSILENHLTESIK.L [174, 187]       | RAB7B peptide ratio, 3  | ND   | ND   | ND   | ND   | ND      |
| <b>ARL8A</b>  |                                     | ARL8A protein ratio     |      |      |      | 1.79 | #DIV/0! |
|               | K.LWDIGGQPR.F [68, 76]              | ARL8A peptide ratio, 1  | 1.09 | 1.04 | 3.82 | 1.40 | 1.30    |
|               | R.GVSAIVYMVDAADQEK.I [87, 102]      | ARL8A peptide ratio, 2  | 0.81 | 0.95 | 1.40 | 1.00 | 0.25    |
|               | R.DLPGALDEKELIEK.M [132, 145] (m    | ARL8A peptide ratio, 3  | 5.38 | 6.20 | 2.48 | 4.00 | 1.60    |
| <b>RAB39B</b> |                                     | RAB39B protein ratio    |      |      |      | ND   | #DIV/0! |
|               | R.SFQNVHEWLEETK.V [95, 107]         | RAB39B peptide ratio, 1 | ND   | ND   | ND   | ND   | ND      |
|               | K.CDLDTQR.Q [124, 130]              | RAB39B peptide ratio, 2 | ND   | ND   | ND   | ND   | ND      |
|               | K.LAAAYGMK.Y [140, 147]             | RAB39B peptide ratio, 3 | ND   | ND   | ND   | ND   | ND      |
|               | K.YIETSAR.D [148, 154]              | RAB39B peptide ratio, 4 | ND   | ND   | ND   | ND   | ND      |
|               | K.SGFVPPNVVHSSEEVK.S [190, 205]     | RAB39B peptide ratio, 5 | ND   | ND   | ND   | ND   | ND      |
| <b>DIRAS2</b> |                                     | DIRAS2 protein ratio    |      |      |      | ND   | #DIV/0! |
|               | R.VAVFGAGGVGK.S [9, 19]             | DIRAS2 peptide ratio, 1 | ND   | ND   | ND   | ND   | ND      |
|               | K.SICTLQITDTTGSHPAMQR.L [52, 65]    | DIRAS2 peptide ratio, 2 | ND   | ND   | ND   | ND   | ND      |
| <b>RAB2B</b>  |                                     | RAB2B protein ratio     |      |      |      | 0.69 | #DIV/0! |
|               | R.ETFNHLTSWLEDAR.Q [26, 39]         | RAB2B peptide ratio, 1  | 0.50 | 0.89 | 0.77 | 0.68 | 0.16    |
|               | K.REEGEAFAR.E [65, 73] (missed 1)   | RAB2B peptide ratio, 2  | 0.70 | 0.49 | 0.42 | 0.51 | 0.12    |
|               | K.TACNVVEEAFINTAK.E [86, 99]        | RAB2B peptide ratio, 3  | 0.42 | 0.39 | 2.47 | 0.56 | 0.97    |
| <b>RAB37</b>  |                                     | RAB37 protein ratio     |      |      |      | ND   | #DIV/0! |
|               | R.SPPCSPSYDLTGK.V [18, 30]          | RAB37 peptide ratio, 1  | ND   | ND   | ND   | ND   | ND      |
|               | K.VMLLGDTGVGK.T [31, 41]            | RAB37 peptide ratio, 2  | ND   | ND   | ND   | ND   | ND      |
|               | K.TCFLIQFK.D [42, 49]               | RAB37 peptide ratio, 3  | ND   | ND   | ND   | ND   | ND      |
|               | R.AGHQADEPSFQIR.D [194, 206]        | RAB37 peptide ratio, 4  | ND   | ND   | ND   | ND   | ND      |
| <b>ARL5B</b>  |                                     | ARL5B protein ratio     |      |      |      | ND   | #DIV/0! |
|               | K.LWSLFCNQEHK.V [7, 17]             | ARL5B peptide ratio, 1  | ND   | ND   | ND   | ND   | ND      |
|               | K.NTHFLMWDIGGQESLR.S [58, 73]       | ARL5B peptide ratio, 2  | ND   | ND   | ND   | ND   | ND      |
|               | K.AAVLIFANK.Q [117, 125]            | ARL5B peptide ratio, 3  | ND   | ND   | ND   | ND   | ND      |
|               | K.GCMTAAEISK.Y [130, 139]           | ARL5B peptide ratio, 4  | ND   | ND   | ND   | ND   | ND      |
| <b>RAB2B</b>  |                                     | RAB2B protein ratio     |      |      |      | 1.48 | #DIV/0! |

|               |                                        |                         |      |       |      |      |         |
|---------------|----------------------------------------|-------------------------|------|-------|------|------|---------|
|               | R.MVNIDGK.Q [46, 52]                   | RAB2B peptide ratio, 1  | 1.48 | 1.16  | 2.23 | 1.51 | 0.45    |
|               | K.IQQGLFDVHNEANGIK.I [170, 185]        | RAB2B peptide ratio, 2  | 1.75 | 1.08  | 1.74 | 1.45 | 0.31    |
|               | K.IGPQQSISTSVGPSASQR.N [186, 201]      | RAB2B peptide ratio, 3  | ND   | ND    | ND   | ND   | ND      |
| <b>RABL3</b>  |                                        | RABL3 protein ratio     |      |       |      | 1.16 | #DIV/0! |
|               | R.WSLEALNR.D [108, 115]                | RABL3 peptide ratio, 1  | 0.70 | 0.75  | 1.32 | 0.85 | 0.28    |
|               | R.YLAAGSSNAVK.L [184, 194]             | RABL3 peptide ratio, 2  | 0.71 | 0.68  | 1.22 | 0.81 | 0.25    |
|               | R.EGNQIPGFDR.K [211, 221]              | RABL3 peptide ratio, 3  | 0.86 | 0.80  | 1.02 | 0.88 | 0.09    |
| <b>RRAGA</b>  |                                        | RRAGA protein ratio     |      |       |      | 1.15 | #DIV/0! |
|               | R.LGATIDVEHSHVR.F [38, 50]             | RRAGA peptide ratio, 1  | 0.87 | 0.86  | 1.60 | 1.02 | 0.35    |
|               | R.NFAQIIEADEVLLFER.A [192, 207]        | RRAGA peptide ratio, 2  | 0.70 | 0.68  | 2.51 | 0.91 | 0.85    |
| <b>RABL6</b>  |                                        | RABL6 protein ratio     |      |       |      | 0.87 | #DIV/0! |
|               | K.LVGSQAPGR.D [7, 16]                  | RABL6 peptide ratio, 1  | 1.05 | 1.90  | 3.06 | 1.66 | 0.83    |
|               | K.NIPAGLQSMNQALQR.R [19, 33]           | RABL6 peptide ratio, 2  | 0.56 | 0.39  | 1.30 | 0.59 | 0.39    |
|               | K.FFNIPFLQLQR.E [226, 236]             | RABL6 peptide ratio, 3  | 0.50 | 1.11  | 1.36 | 0.83 | 0.36    |
| <b>RAB4B</b>  |                                        | RAB4B protein ratio     |      |       |      | 1.02 | #DIV/0! |
|               | K.FLVIGSAGTGK.S [45, 55]               | RAB4B peptide ratio, 1  | 0.58 | 0.64  | 1.31 | 0.74 | 0.33    |
|               | K.SCLLHQFIENK.F [56, 66]               | RAB4B peptide ratio, 2  | 6.10 | 12.63 | 0.23 | 0.64 | 5.06    |
|               | K.IDSGELDPER.M [207, 216]              | RAB4B peptide ratio, 3  | 0.88 | 0.82  | 1.08 | 0.92 | 0.11    |
|               | R.MGSGIQYGDAASLR.Q [217, 229]          | RAB4B peptide ratio, 4  | 0.51 | 0.55  | 1.29 | 0.66 | 0.36    |
| <b>ARF1</b>   |                                        | ARF1 protein ratio      |      |       |      | 1.30 | #DIV/0! |
|               | K.NISFTVWDVGGQDK.I [59, 72]            | ARF1 peptide ratio, 1   | 0.78 | 0.78  | 1.90 | 0.97 | 0.53    |
|               | K.QDLPNAMNAAEITDK.L [127, 141]         | ARF1 peptide ratio, 2   | 0.58 | 0.57  | 2.52 | 0.78 | 0.92    |
|               | K.QDLPNAMNAAEITDK.L [127, 141]         | ARF1 peptide ratio, 3   | 0.49 | 0.50  | 2.75 | 0.68 | 1.06    |
| <b>ARF3</b>   |                                        | ARF3 protein ratio      |      |       |      | 1.87 | #DIV/0! |
|               | R.VNEAREELMR.M [99, 108] (missed)      | ARF3 peptide ratio, 1   | 1.94 | 1.87  | 3.30 | 2.21 | 0.66    |
|               | R.VNEAREELMR.M [99, 108] (missed)      | ARF3 peptide ratio, 2   | 2.99 | 2.76  | 3.59 | 3.08 | 0.35    |
|               | K.LGLHSLR.H [142, 148]                 | ARF3 peptide ratio, 3   | 1.11 | 1.14  | 1.62 | 1.26 | 0.23    |
| <b>ARF4</b>   |                                        | ARF4 protein ratio      |      |       |      | 2.76 | #DIV/0! |
|               | K.NICFTVWDVGGQDR.I [59, 72]            | ARF4 peptide ratio, 1   | 1.27 | 1.28  | 3.10 | 1.58 | 0.86    |
|               | R.IQEVADQLK.M [99, 108]                | ARF4 peptide ratio, 2   | 1.89 | 0.94  | 3.58 | 1.60 | 1.09    |
|               | R.DAVLLLFANK.Q [117, 126]              | ARF4 peptide ratio, 3   | 1.68 | 1.60  | 2.63 | 1.87 | 0.47    |
|               | K.LGLQSLR.N [142, 148]                 | ARF4 peptide ratio, 4   | 1.59 | 1.59  | 2.74 | 1.85 | 0.54    |
| <b>ARF5</b>   |                                        | ARF5 protein ratio      |      |       |      | 0.60 | #DIV/0! |
|               | K.NICFTVWDVGGQDK.I [59, 72]            | ARF5 peptide ratio, 1   | 0.55 | 0.70  | 1.03 | 0.71 | 0.20    |
|               | R.VQESADELQK.M [99, 108]               | ARF5 peptide ratio, 2   | 0.35 | 0.38  | 1.41 | 0.49 | 0.49    |
|               | K.LGLQHLR.S [142, 148]                 | ARF5 peptide ratio, 3   | 1.05 | 0.86  | 0.25 | 0.49 | 0.34    |
| <b>ARF6</b>   |                                        | ARF6 protein ratio      |      |       |      | 0.68 | #DIV/0! |
|               | R.ILMLGLDAAGK.T [15, 25]               | ARF6 peptide ratio, 1   | 5.86 | 0.41  | 0.41 | 0.60 | 2.57    |
|               | R.ILMLGLDAAGK.T [15, 25]               | ARF6 peptide ratio, 2   | 3.02 | 1.24  | 0.43 | 0.87 | 1.08    |
|               | K.LGQSVTTIPTVGFNVETVTK.N [34, 44]      | ARF6 peptide ratio, 3   | 0.39 | 1.02  | 1.05 | 0.67 | 0.30    |
|               | K.FNVWDVGGQDK.I [58, 68]               | ARF6 peptide ratio, 4   | 0.35 | 0.32  | 0.95 | 0.43 | 0.29    |
| <b>RALA</b>   |                                        | RALA protein ratio      |      |       |      | 1.10 | #DIV/0! |
|               | K.GQNSLALHK.V [7, 15]                  | RALA peptide ratio, 1   | 1.21 | 1.18  | 1.30 | 1.23 | 0.05    |
|               | K.EDENVPFLLVGNK.S [115, 127]           | RALA peptide ratio, 2   | ND   | ND    | ND   | ND   | ND      |
|               | R.QVSVEEAK.N [135, 142]                | RALA peptide ratio, 3   | 0.76 | 0.83  | 1.37 | 0.92 | 0.27    |
|               | R.AEQWNVNYVETSAK.T [145, 158]          | RALA peptide ratio, 4   | 0.65 | 0.67  | 2.04 | 0.85 | 0.65    |
| <b>RHOT1</b>  |                                        | RHOT1 protein ratio     |      |       |      | ND   | #DIV/0! |
|               | R.LPLILVGNK.S [110, 118]               | RHOT1 peptide ratio, 1  | ND   | ND    | ND   | ND   | ND      |
|               | K.AVLHPTGPLYCPEEK.E [164, 178]         | RHOT1 peptide ratio, 2  | ND   | ND    | ND   | ND   | ND      |
|               | R.ICFNTPLAPQALEDVK.N [214, 229]        | RHOT1 peptide ratio, 3  | ND   | ND    | ND   | ND   | ND      |
| <b>ARL1</b>   |                                        | ARL1 protein ratio      |      |       |      | 2.65 | #DIV/0! |
|               | R.ILILGLDGAGK.T [19, 29]               | ARL1 peptide ratio, 1   | 1.59 | 1.60  | 2.98 | 1.89 | 0.65    |
|               | K.FQVWDLGGQTSIRPYWR.C [62, 78]         | ARL1 peptide ratio, 2   | ND   | ND    | ND   | ND   | ND      |
|               | K.AILVVFANK.Q [118, 126]               | ARL1 peptide ratio, 3   | 2.03 | 1.84  | 2.56 | 2.10 | 0.31    |
| <b>RAC1</b>   |                                        | RAC1 protein ratio      |      |       |      | 1.14 | #DIV/0! |
|               | R.LRPLSYPQTVGETYGK.D [66, 81]          | RAC1 peptide ratio, 1   | 1.11 | 1.08  | 0.59 | 0.85 | 0.24    |
| <b>RABL2B</b> |                                        | RABL2B protein ratio    |      |       |      | 1.37 | #DIV/0! |
|               | K.IDADINVTQK.S [134, 143]              | RABL2B peptide ratio, 1 | 0.96 | 0.78  | 1.06 | 0.92 | 0.11    |
| <b>ARL16</b>  |                                        | ARL16 protein ratio     |      |       |      | ND   | #DIV/0! |
|               | K.GDLGEPPTRPVTGNTLTDIVAQR.R [166, 176] | ARL16 peptide ratio, 1  | ND   | ND    | ND   | ND   | ND      |
|               | K.QNITTAEISAR.E [166, 176]             | ARL16 peptide ratio, 2  | ND   | ND    | ND   | ND   | ND      |
|               | R.EGTGLAGVLAWLQATHR.A [177, 192]       | ARL16 peptide ratio, 3  | ND   | ND    | ND   | ND   | ND      |
| <b>REM1</b>   |                                        | REM1 protein ratio      |      |       |      | ND   | #DIV/0! |
|               | R.LSTVPSTQSQHPR.L [32, 44]             | REM1 peptide ratio, 1   | ND   | ND    | ND   | ND   | ND      |
|               | K.TSLASLFAGK.Q [93, 102]               | REM1 peptide ratio, 2   | ND   | ND    | ND   | ND   | ND      |
|               | R.DLHEQLGEDVYER.T [106, 118]           | REM1 peptide ratio, 3   | ND   | ND    | ND   | ND   | ND      |
|               | R.GSFESASELR.I [166, 175]              | REM1 peptide ratio, 4   | ND   | ND    | ND   | ND   | ND      |
| <b>RAB14</b>  |                                        | RAB14 protein ratio     |      |       |      | 0.68 | #DIV/0! |
|               | K.YIIIGDMGVGK.S [13, 23]               | RAB14 peptide ratio, 1  | 0.77 | 0.73  | 1.27 | 0.87 | 0.24    |
|               | R.STYNHLSSWLTDAR.N [96, 109]           | RAB14 peptide ratio, 2  | 0.77 | 0.62  | 1.44 | 0.83 | 0.36    |
|               | K.TGENVEDAFLEAAK.K [156, 169]          | RAB14 peptide ratio, 3  | 0.42 | 0.38  | 2.18 | 0.55 | 0.84    |
| <b>SRPRB</b>  |                                        | SRPRB protein ratio     |      |       |      | 2.82 | #DIV/0! |
|               | R.AVLLVGLCDSGK.T [65, 76]              | SRPRB peptide ratio, 1  | 1.53 | 1.34  | 2.55 | 1.67 | 0.53    |
|               | R.DTQTSITDSCAVYR.V [90, 103]           | SRPRB peptide ratio, 2  | 1.20 | 1.07  | 3.46 | 1.46 | 1.10    |

|                |                                    |                           |      |      |      |      |         |
|----------------|------------------------------------|---------------------------|------|------|------|------|---------|
|                | K.LIQQQLEK.E [191, 198]            | SRPRB peptide ratio, 3    | 1.05 | 0.93 | 2.35 | 1.23 | 0.64    |
| <b>RAB35</b>   |                                    | RAB35 protein ratio       |      |      |      | 1.22 | #DIV/0! |
|                | R.TITSTYYR.G [71, 78]              | RAB35 peptide ratio, 1    | 0.69 | 0.73 | 1.46 | 0.86 | 0.35    |
|                | R.WLHEINQNCDDVCR.I [101, 114]      | RAB35 peptide ratio, 2    | 0.95 | 0.63 | 1.10 | 0.85 | 0.20    |
|                | K.VVETEDAYK.F [128, 136]           | RAB35 peptide ratio, 3    | 0.68 | 0.55 | 1.27 | 0.74 | 0.31    |
|                | K.FAGQMGIQLFETSAK.E [137, 151]     | RAB35 peptide ratio, 4    | ND   | ND   | ND   | ND   | ND      |
|                | K.FAGQMGIQLFETSAK.E [137, 151]     | RAB35 peptide ratio, 5    | ND   | ND   | ND   | ND   | ND      |
| <b>RAB3B</b>   |                                    | RAB3B protein ratio       |      |      |      | ND   | #DIV/0! |
|                | K.DASDQNFDFYMFK.L [12, 23]         | RAB3B peptide ratio, 1    | ND   | ND   | ND   | ND   | ND      |
|                | K.GQLLAELGDFDFEASAK.E [149, 161]   | RAB3B peptide ratio, 2    | ND   | ND   | ND   | ND   | ND      |
|                | K.MSDSLDTPSMLGSSK.N [186, 201]     | RAB3B peptide ratio, 3    | ND   | ND   | ND   | ND   | ND      |
| <b>RAB30</b>   |                                    | RAB30 protein ratio       |      |      |      | 0.77 | #DIV/0! |
|                | K.IVLIGNAGVVK.T [11, 21]           | RAB30 peptide ratio, 1    | 1.25 | 0.86 | 1.07 | 1.03 | 0.16    |
|                | R.EIEQYASNK.V [105, 113]           | RAB30 peptide ratio, 2    | 3.58 | 2.81 | 0.36 | 0.87 | 1.37    |
|                | K.VITVLVGNK.I [114, 122]           | RAB30 peptide ratio, 3    | 1.13 | 0.47 | 1.14 | 0.77 | 0.31    |
|                | K.LFLDLACR.L [161, 168]            | RAB30 peptide ratio, 4    | ND   | ND   | ND   | ND   | ND      |
|                | R.QNTLVNNVSSPLPGEK.S [175, 199]    | RAB30 peptide ratio, 5    | ND   | ND   | ND   | ND   | ND      |
| <b>RHOF</b>    |                                    | RHOF protein ratio        |      |      |      | ND   | #DIV/0! |
|                | K.IVIVGDGGCGK.T [21, 31]           | RHOF peptide ratio, 1     | ND   | ND   | ND   | ND   | ND      |
|                | K.YTASVTVGSK.E [55, 64]            | RHOF peptide ratio, 2     | ND   | ND   | ND   | ND   | ND      |
|                | K.EVTLNLYDTAGQEDYDR.L [65, 81]     | RHOF peptide ratio, 3     | ND   | ND   | ND   | ND   | ND      |
|                | K.WFPEVTHFCR.G [112, 121]          | RHOF peptide ratio, 4     | ND   | ND   | ND   | ND   | ND      |
|                | R.AALYLECSAK.F [166, 175]          | RHOF peptide ratio, 5     | ND   | ND   | ND   | ND   | ND      |
| <b>RAB34</b>   |                                    | RAB34 protein ratio       |      |      |      | ND   | #DIV/0! |
|                | K.VIVVGDLSVVK.T [54, 64]           | RAB34 peptide ratio, 1    | ND   | ND   | ND   | ND   | ND      |
|                | R.FEVLGIPFSLQLWDTAGQER.F [93, 103] | RAB34 peptide ratio, 2    | ND   | ND   | ND   | ND   | ND      |
|                | K.ENDPSSVLLFLVGSK.K [152, 166]     | RAB34 peptide ratio, 3    | ND   | ND   | ND   | ND   | ND      |
|                | K.AEYWAVSSLTGENVR.E [191, 205]     | RAB34 peptide ratio, 4    | ND   | ND   | ND   | ND   | ND      |
|                | R.INSDDSNLYLTASK.K [238, 251]      | RAB34 peptide ratio, 5    | ND   | ND   | ND   | ND   | ND      |
| <b>RAB43</b>   |                                    | RAB43 protein ratio       |      |      |      | 2.44 | #DIV/0! |
|                | K.YAGSNIVQLLIGNK.S [118, 131]      | RAB43 peptide ratio, 1    | 1.40 | 1.54 | 2.25 | 1.66 | 0.37    |
|                | K.DSSNVEEAFLR.V [164, 174]         | RAB43 peptide ratio, 2    | 1.29 | 1.50 | 2.36 | 1.61 | 0.46    |
|                | R.VATELIMR.H [175, 182]            | RAB43 peptide ratio, 3    | 1.45 | 1.34 | 1.11 | 1.29 | 0.14    |
|                | K.SPDIHLNSK.D [192, 201]           | RAB43 peptide ratio, 4    | 1.98 | 1.21 | 2.74 | 1.77 | 0.62    |
| <b>NKIRAS1</b> |                                    | NKIRAS1 protein ratio     |      |      |      | 1.62 | #DIV/0! |
|                | K.VVVCGLLSVVK.T [6, 16]            | NKIRAS1 peptide ratio, 1  | 0.53 | 0.78 | 0.99 | 0.72 | 0.19    |
|                | R.QVDAEVAQQWAK.S [128, 139]        | NKIRAS1 peptide ratio, 2  | 2.96 | 5.62 | 0.74 | 1.61 | 1.99    |
|                | K.TLIEPFTLLASK.L [155, 166]        | NKIRAS1 peptide ratio, 3  | 0.97 | 0.72 | 2.10 | 1.03 | 0.60    |
| <b>RAB12</b>   |                                    | RAB12 protein ratio       |      |      |      | 0.92 | #DIV/0! |
|                | R.AGGGGGLGAGSPALSGGQGR.R [10, 20]  | RAB12 peptide ratio, 1    | 0.71 | 0.55 | 1.18 | 0.74 | 0.27    |
|                | K.LQVIIIGSR.G [42, 50]             | RAB12 peptide ratio, 2    | 0.97 | 0.67 | 1.10 | 0.87 | 0.18    |
|                | R.FTDDTFCEACK.S [61, 71]           | RAB12 peptide ratio, 3    | 0.65 | 0.85 | 1.76 | 0.92 | 0.48    |
|                | R.FNSITSAYYR.S [103, 112]          | RAB12 peptide ratio, 4    | 1.55 | 1.50 | 0.82 | 1.19 | 0.33    |
|                | K.FAQQITGMR.F [172, 180]           | RAB12 peptide ratio, 5    | ND   | ND   | ND   | ND   | ND      |
| <b>KRAS</b>    |                                    | KRAS(4A) protein ratio    |      |      |      | ND   | #DIV/0! |
| Isoform 2A     | K.DSEDVPMVLVGNK.C [104, 116]       | KRAS(4A) peptide ratio, 1 | ND   | ND   | ND   | ND   | ND      |
| Isoform 2A     | R.QRVEDAFYTLVR.E [149, 160] (miss) | KRAS(4A) peptide ratio, 2 | ND   | ND   | ND   | ND   | ND      |
| Isoform 2A     | R.VEDAFYTLVR.E [151, 160]          | KRAS(4A) peptide ratio, 3 | ND   | ND   | ND   | ND   | ND      |
| <b>KRAS</b>    |                                    | KRAS(4B) protein ratio    |      |      |      | 0.98 | #DIV/0! |
| Isoform 2B     | R.SYGIPFIETSAK.T [135, 146]        | KRAS(4B) peptide ratio, 1 | 0.47 | 0.51 | 1.39 | 0.62 | 0.43    |
| Isoform 2B     | K.TRQGVDDAFYTLVR.E [147, 160] (n)  | KRAS(4B) peptide ratio, 2 | 1.58 | 0.33 | 3.27 | 0.75 | 1.21    |
| Isoform 2B     | R.QGVDDAFYTLVR.E [149, 160]        | KRAS(4B) peptide ratio, 3 | 0.61 | 0.55 | 1.18 | 0.70 | 0.29    |
| <b>RAB11A</b>  |                                    | RAB11A protein ratio      |      |      |      | ND   | #DIV/0! |
|                | K.NGLSFIETSALDSTNVEAAFQILT         | RAB11A peptide ratio, 1   | ND   | ND   | ND   | ND   | ND      |
| <b>RHOT2</b>   |                                    | RHOT2 protein ratio       |      |      |      | ND   | #DIV/0! |
|                | K.WIPLVNGGTTQGPR.V [96, 109]       | RHOT2 peptide ratio, 1    | ND   | ND   | ND   | ND   | ND      |
|                | K.SAFLQAFLGR.G [429, 438]          | RHOT2 peptide ratio, 2    | ND   | ND   | ND   | ND   | ND      |
|                | K.ADLPEGVAVSGPSPAEFCR.K [525, 535] | RHOT2 peptide ratio, 3    | ND   | ND   | ND   | ND   | ND      |
| <b>RAB19</b>   |                                    | RAB19 protein ratio       |      |      |      | ND   | #DIV/0! |
|                | R.AADENFDYLFK.I [76, 86]           | RAB19 peptide ratio, 1    | ND   | ND   | ND   | ND   | ND      |
|                | K.IILIGDSNVGK.T [87, 97]           | RAB19 peptide ratio, 2    | ND   | ND   | ND   | ND   | ND      |
|                | K.MQVWDTAGQER.F [135, 145]         | RAB19 peptide ratio, 3    | ND   | ND   | ND   | ND   | ND      |
|                | R.SAHAAIIAYDLTR.R [156, 168]       | RAB19 peptide ratio, 4    | ND   | ND   | ND   | ND   | ND      |
|                | R.HVLFEDACTLAEK.Y [205, 217]       | RAB19 peptide ratio, 5    | ND   | ND   | ND   | ND   | ND      |
| <b>RHOA</b>    |                                    | RHOA protein ratio        |      |      |      | 1.07 | #DIV/0! |
|                | K.QEPVKPEEGR.D [135, 144]          | RHOA peptide ratio, 1     | ND   | ND   | ND   | ND   | ND      |
|                | R.IGAFGYMECSAK.T [150, 161]        | RHOA peptide ratio, 2     | 0.64 | 0.63 | 1.13 | 0.74 | 0.23    |
|                | R.IGAFGYMECSAK.T [150, 161]        | RHOA peptide ratio, 3     | 0.58 | 0.67 | 1.07 | 0.73 | 0.21    |
| <b>RAB4A</b>   |                                    | RAB4A protein ratio       |      |      |      | 3.16 | #DIV/0! |
|                | K.FLVIGNAGTGK.S [15, 25]           | RAB4A peptide ratio, 1    | 2.02 | 1.65 | 3.09 | 2.11 | 0.61    |
|                | K.IESGELDPER.M [177, 186]          | RAB4A peptide ratio, 2    | 1.47 | 1.40 | 4.49 | 1.86 | 1.44    |
|                | R.MGSGIQYGDAALR.Q [187, 199]       | RAB4A peptide ratio, 3    | 1.58 | 1.41 | 4.26 | 1.90 | 1.31    |
| <b>RAN</b>     |                                    | RAN protein ratio         |      |      |      | 1.24 | #DIV/0! |
|                | K.FNVWDTAGQEK.F [60, 70]           | RAN peptide ratio, 1      | 0.75 | 0.71 | 1.79 | 0.91 | 0.50    |



|                    |                                                            |                         |                                 |                 |                |                   |                    |
|--------------------|------------------------------------------------------------|-------------------------|---------------------------------|-----------------|----------------|-------------------|--------------------|
|                    | R.VCENIPIVL $\underline{C}$ GNK.V [110, 122]               | RAN peptide ratio, 2    | 0.92                            | 0.95            | 1.71           | 1.10              | 0.37               |
|                    | K.NLQYYDISAK.S [142, 151]                                  | RAN peptide ratio, 3    | 0.83                            | 0.82            | 1.71           | 1.00              | 0.42               |
| <b>RAB34</b>       |                                                            | RAB34 protein ratio     |                                 |                 |                | ND                | #DIV/0!            |
|                    | - $\underline{M}$ SHLPGLELR.R [0, 9]                       | RAB34 peptide ratio, 1  | ND                              | ND              | ND             | ND                | ND                 |
|                    | R.VLAELPQC $\underline{L}$ R.K [68, 77]                    | RAB34 peptide ratio, 2  | ND                              | ND              | ND             | ND                | ND                 |
| <b>RAB11A</b>      |                                                            | RAB11A protein ratio    |                                 |                 |                | ND                | #DIV/0!            |
|                    | R.ENDMSPSNV $\underline{V}$ PIHVPPTTEN $\underline{KPK}$   | RAB11A peptide ratio, 1 | ND                              | ND              | ND             | ND                | ND                 |
|                    | R.ENDMSPSNV $\underline{V}$ PIHVPPTTEN $\underline{KPK}$   | RAB11A peptide ratio, 2 | ND                              | ND              | ND             | ND                | ND                 |
| <b>RABL4/IFT27</b> |                                                            | RABL4 protein ratio     |                                 |                 |                | 1.24              | #DIV/0!            |
|                    | K. $\underline{C}$ ILAGDPAVGK.T [7, 17]                    | RABL4 peptide ratio, 1  | 0.70                            | 0.50            | 2.77           | 0.79              | 1.02               |
|                    | K.TALAQIFR.S [18, 25]                                      | RABL4 peptide ratio, 2  | 0.95                            | 0.96            | 0.83           | 0.91              | 0.06               |
|                    | R.SQAPGISLPGVLVGNK.T [108, 123]                            | RABL4 peptide ratio, 3  | 0.77                            | 0.70            | 2.18           | 0.94              | 0.68               |
|                    |                                                            |                         |                                 |                 |                |                   |                    |
|                    |                                                            |                         | <b>R<sub>WM793/1205Lu</sub></b> |                 |                |                   |                    |
|                    |                                                            |                         | <b>WMLu, F1</b>                 | <b>WMLu, F2</b> | <b>WMLu, R</b> | <b>WMLu, Mean</b> | <b>WM/Lu, S.D.</b> |
| <b>NRAS</b>        |                                                            | NRAS protein ratio      |                                 |                 |                | 0.62              | #DIV/0!            |
|                    | R.TGEGFL $\underline{C}$ VFAINNSK.S [73, 87]               | NRAS peptide ratio, 1   | 9.78                            | 10.40           | 0.16           | 0.48              | 4.69               |
|                    | K.SFADINLYR.E [88, 96]                                     | NRAS peptide ratio, 2   | 1.28                            | 0.73            | 0.20           | 0.42              | 0.44               |
|                    | R.QGVEDAFYTLVR.E [149, 160]                                | NRAS peptide ratio, 3   | 1.69                            | 1.93            | 0.39           | 0.81              | 0.68               |
| <b>HRAS</b>        |                                                            | HRAS protein ratio      |                                 |                 |                | 1.07              | #DIV/0!            |
|                    | R.TGEGFL $\underline{C}$ VFAINNTK.S [73, 87]               | HRAS peptide ratio, 1   | 2.02                            | 1.07            | 0.51           | 0.88              | 0.62               |
|                    | K.SFEDIHQYR.E [88, 96]                                     | HRAS peptide ratio, 2   | 1.45                            | 1.36            | 1.24           | 1.34              | 0.08               |
|                    | R.SYGIPYIETSAK.T [135, 146]                                | HRAS peptide ratio, 3   | 0.78                            | 1.12            | 1.29           | 1.01              | 0.21               |
| <b>RHOB</b>        |                                                            | RHOB protein ratio      |                                 |                 |                | 0.25              | #DIV/0!            |
|                    | K.LVVVGDGAC $\underline{C}$ GK.T [7, 17]                   | RHOB peptide ratio, 1   | 0.24                            | 0.22            | 0.18           | 0.21              | 0.03               |
|                    | K.DEFPEVYVPTVFENYVADIEVDGK.                                | RHOB peptide ratio, 2   | 0.48                            | 0.25            | 0.24           | 0.29              | 0.11               |
|                    | R.IQAYDYLE $\underline{C}$ SAK.T [150, 161]                | RHOB peptide ratio, 3   | 0.44                            | 0.55            | 0.28           | 0.39              | 0.11               |
|                    | R.EVFETATR.A [168, 175]                                    | RHOB peptide ratio, 4   | 0.23                            | 0.26            | 0.30           | 0.26              | 0.03               |
| <b>RND3</b>        |                                                            | RND3 protein ratio      |                                 |                 |                | 1.65              | #DIV/0!            |
|                    | K.IVVVGDSD $\underline{C}$ Q $\underline{C}$ GK.T [25, 35] | RND3 peptide ratio, 1   | 0.49                            | 0.77            | 0.77           | 0.65              | 0.13               |
|                    | K.TALLHVFAK.D [36, 44]                                     | RND3 peptide ratio, 2   | ND                              | ND              | ND             | ND                | ND                 |
|                    | K.GEIQEF $\underline{C}$ PNTK.M [118, 128]                 | RND3 peptide ratio, 3   | 0.39                            | 0.56            | 2.11           | 0.62              | 0.78               |
|                    | R.TDVSTLVELSNHR.Q [140, 152]                               | RND3 peptide ratio, 4   | ND                              | ND              | ND             | ND                | ND                 |
|                    | R.DIFHVATLAC $\underline{V}$ NK.T [187, 199]               | RND3 peptide ratio, 5   | 0.38                            | 3.18            | 1.92           | 0.87              | 1.14               |
| <b>RAB39</b>       |                                                            | RAB39 protein ratio     |                                 |                 |                | 1.02              | #DIV/0!            |
|                    | R.LIVIGDSTV $\underline{G}$ K.S [10, 20]                   | RAB39 peptide ratio, 1  | ND                              | ND              | ND             | ND                | ND                 |
|                    | R.IKLQLWDTAGQER.F [61, 73] (miss)                          | RAB39 peptide ratio, 2  | 6.80                            | 4.81            | 0.13           | 0.36              | 2.80               |
|                    | K.LQLWDTAGQER.F [63, 73]                                   | RAB39 peptide ratio, 3  | 1.31                            | 1.29            | 1.22           | 1.27              | 0.04               |
| <b>ARL5A</b>       |                                                            | ARL5A protein ratio     |                                 |                 |                | 0.55              | #DIV/0!            |
|                    | R.FLMWDIGGQESLR.S [24, 36]                                 | ARL5A peptide ratio, 1  | ND                              | ND              | ND             | ND                | ND                 |
|                    | K.MLAHEDLR.K [71, 78]                                      | ARL5A peptide ratio, 2  | 5.59                            | 0.09            | 0.25           | 0.20              | 2.56               |
|                    | K.AGLLIFANK.Q [80, 88]                                     | ARL5A peptide ratio, 3  | 0.55                            | 1.06            | 0.55           | 0.66              | 0.24               |
| <b>SAR1B</b>       |                                                            | SAR1B protein ratio     |                                 |                 |                | 1.17              | #DIV/0!            |
|                    | K.IDRPEAISEER.L [135, 145]                                 | SAR1B peptide ratio, 1  | ND                              | ND              | ND             | ND                | ND                 |
|                    | R.EMFGLYGQTTGK.G [148, 159]                                | SAR1B peptide ratio, 2  | 2.79                            | 1.39            | 0.44           | 0.89              | 0.97               |
|                    | K.ELNARPLEVFM $\underline{C}$ SVLK.R [166, 181]            | SAR1B peptide ratio, 3  | 2.11                            | 2.15            | 0.58           | 1.13              | 0.73               |
| <b>RABL2A</b>      |                                                            | RABL2A protein ratio    |                                 |                 |                | 0.89              | #DIV/0!            |
|                    | K.TKPSELDQ $\underline{G}$ K.Y [5, 14]                     | RABL2A peptide ratio, 1 | 1.72                            | 3.01            | 0.60           | 1.16              | 0.99               |
|                    | K.II $\underline{C}$ LGDSAVGK.S [23, 33]                   | RABL2A peptide ratio, 2 | 0.89                            | 0.82            | 0.94           | 0.88              | 0.05               |
|                    | R.NLSTWYTELR.E [110, 119]                                  | RABL2A peptide ratio, 3 | 0.85                            | 1.20            | 1.17           | 1.04              | 0.16               |
|                    | R.EFRPEIPC $\underline{V}$ VANK.I [120, 133]               | RABL2A peptide ratio, 4 | 0.77                            | 2.77            | 0.49           | 0.81              | 1.01               |
| <b>DIRAS1</b>      |                                                            | DIRAS1 protein ratio    |                                 |                 |                | 0.52              | #DIV/0!            |
|                    | R.VVVFAGG $\underline{V}$ GK.S [9, 19]                     | DIRAS1 peptide ratio, 1 | 0.79                            | 0.89            | 0.55           | 0.71              | 0.14               |
|                    | R.DTYIPTIEDTYR.Q [33, 44]                                  | DIRAS1 peptide ratio, 2 | 0.67                            | 0.66            | 0.86           | 0.72              | 0.10               |
|                    | K.GSVEDIPVMLVGNK.C [108, 121]                              | DIRAS1 peptide ratio, 3 | 0.47                            | 0.68            | 0.42           | 0.50              | 0.11               |
|                    | R.EAQAVAQEWK.C [133, 142]                                  | DIRAS1 peptide ratio, 4 | 0.75                            | 0.56            | 0.91           | 0.71              | 0.14               |
| <b>ARL2</b>        |                                                            | ARL2 protein ratio      |                                 |                 |                | 1.00              | #DIV/0!            |
|                    | R.ELQSLLEER.L [104, 113]                                   | ARL2 peptide ratio, 1   | 0.97                            | 0.92            | 1.06           | 0.98              | 0.06               |
|                    | R.LAGATLLIFANK.Q [114, 125]                                | ARL2 peptide ratio, 2   | 0.84                            | 0.85            | 1.36           | 0.97              | 0.24               |
|                    | R.EVLELDSIR.S [139, 147]                                   | ARL2 peptide ratio, 3   | 2.12                            | 0.98            | 0.74           | 1.05              | 0.60               |
| <b>ARL3</b>        |                                                            | ARL3 protein ratio      |                                 |                 |                | 1.23              | #DIV/0!            |
|                    | R.ILLLGLDNAGK.T [19, 29]                                   | ARL3 peptide ratio, 1   | 1.47                            | 1.50            | 0.31           | 0.66              | 0.55               |
|                    | K.QLASEDISHITPTQGFK.S [35, 53]                             | ARL3 peptide ratio, 2   | 1.76                            | 0.86            | 0.37           | 0.67              | 0.57               |
|                    | K.LSC $\underline{V}$ PVLIFANK.Q [115, 126]                | ARL3 peptide ratio, 3   | 1.51                            | 1.37            | 0.90           | 1.20              | 0.26               |
| <b>TRIM23</b>      |                                                            | TRIM23 protein ratio    |                                 |                 |                | ND                | #DIV/0!            |
|                    | R.DALLLIFANK.Q [504, 513]                                  | TRIM23 peptide ratio, 1 | ND                              | ND              | ND             | ND                | ND                 |
| <b>RALB</b>        |                                                            | RALB protein ratio      |                                 |                 |                | 0.90              | #DIV/0!            |
|                    | K.GQSSLALHK.V [29, 37]                                     | RALB peptide ratio, 1   | 2.19                            | 7.14            | 0.72           | 1.51              | 2.75               |
|                    | R.QVPVEEAR.S [158, 165]                                    | RALB peptide ratio, 2   | ND                              | ND              | ND             | ND                | ND                 |
|                    | K.AEEWGVQYVETSAK.T [168, 181]                              | RALB peptide ratio, 3   | 1.97                            | 0.30            | 5.24           | 0.75              | 2.05               |
| <b>ARL15</b>       |                                                            | ARL15 protein ratio     |                                 |                 |                | 0.47              | #DIV/0!            |
|                    | K.L $\underline{C}$ SESPDNVSTTGFSIK.A [51, 68]             | ARL15 peptide ratio, 1  | 0.97                            | 3.98            | 0.49           | 0.91              | 1.54               |
|                    | K.AVPFQNAILNVK.E [69, 80]                                  | ARL15 peptide ratio, 2  | 2.89                            | 0.36            | 0.81           | 0.68              | 1.10               |
|                    | K.ELGGADNIR.K [81, 89]                                     | ARL15 peptide ratio, 3  | 1.73                            | 0.88            | 1.29           | 1.20              | 0.35               |

|               |                                     |                         |      |      |      |      |         |
|---------------|-------------------------------------|-------------------------|------|------|------|------|---------|
|               | K.YFELEPLAR.G [157, 165]            | ARL15 peptide ratio, 4  | 0.97 | 2.35 | 0.92 | 1.18 | 0.66    |
|               | K.DSFSQLINLLEEK.D [184, 196]        | ARL15 peptide ratio, 5  | ND   | ND   | ND   | ND   | ND      |
| <b>RAB1A</b>  |                                     | RAB1A protein ratio     |      |      |      | 1.07 | #DIV/0! |
|               | R.GAHGIIVVYDVTQESFNNV.K.Q [82, 117] | RAB1A peptide ratio, 1  | 1.29 | 1.42 | 0.77 | 1.08 | 0.28    |
|               | K.NATNVEQSFMTMAAEIK.K [156, 171]    | RAB1A peptide ratio, 2  | 1.38 | 0.76 | 1.38 | 1.09 | 0.29    |
|               | R.MGPGATAGGAEK.S [175, 186]         | RAB1A peptide ratio, 3  | 1.15 | 1.55 | 0.74 | 1.04 | 0.33    |
| <b>CDC42</b>  |                                     | CDC42 protein ratio     |      |      |      | 1.00 | #DIV/0! |
| Isoform 1     | K.TCLLISYTTNK.F [16, 26]            | CDC42 peptide ratio, 1  | 1.07 | 1.07 | 0.89 | 1.00 | 0.08    |
| Isoform 1     | K.WVPEITHHC.PK.T [96, 106]          | CDC42 peptide ratio, 2  | 1.02 | 0.99 | 0.87 | 0.96 | 0.07    |
| Isoform 1     | K.TPFLLVGTQIDLR.D [107, 119]        | CDC42 peptide ratio, 3  | 2.19 | 0.86 | 0.61 | 0.92 | 0.70    |
| <b>RAB21</b>  |                                     | RAB21 protein ratio     |      |      |      | 0.99 | #DIV/0! |
|               | K.VVLLGEGCVGK.T [21, 31]            | RAB21 peptide ratio, 1  | 0.88 | 1.55 | 1.18 | 1.14 | 0.28    |
|               | R.VNLAIWDTAGQER.F [67, 79]          | RAB21 peptide ratio, 2  | 0.64 | 1.63 | 1.01 | 0.95 | 0.41    |
|               | R.HVSIQEAESYAESVGAK.H [140, 155]    | RAB21 peptide ratio, 3  | ND   | ND   | ND   | ND   | ND      |
| <b>RAB22A</b> |                                     | RAB22A protein ratio    |      |      |      | 1.84 | #DIV/0! |
|               | K.TVQYQNELHK.F [45, 54]             | RAB22A peptide ratio, 1 | ND   | ND   | ND   | ND   | ND      |
|               | K.EETFSTLKN.N [89, 96]              | RAB22A peptide ratio, 2 | 1.75 | 1.23 | 2.23 | 1.64 | 0.41    |
|               | K.DYADSIHAIFVETSAKN.N [134, 149]    | RAB22A peptide ratio, 3 | 4.39 | 2.08 | 0.33 | 0.81 | 1.66    |
|               | R.IPSTDANLPSGGK.G [165, 177]        | RAB22A peptide ratio, 4 | 2.45 | 3.15 | 0.45 | 1.02 | 1.15    |
| <b>RAB17</b>  |                                     | RAB17 protein ratio     |      |      |      | ND   | #DIV/0! |
|               | K.SILPTVGC.AFFT.K.V [45, 57]        | RAB17 peptide ratio, 1  | ND   | ND   | ND   | ND   | ND      |
|               | K.LEIWDTAGQEK.Y [68, 78]            | RAB17 peptide ratio, 2  | ND   | ND   | ND   | ND   | ND      |
|               | K.YHSVCHLYFR.G [79, 88]             | RAB17 peptide ratio, 3  | ND   | ND   | ND   | ND   | ND      |
|               | R.SDEEGQALR.G [183, 191]            | RAB17 peptide ratio, 4  | ND   | ND   | ND   | ND   | ND      |
| <b>RAB23</b>  |                                     | RAB23 protein ratio     |      |      |      | 0.98 | #DIV/0! |
|               | K.TIGVDFLE.R.Q [40, 48]             | RAB23 peptide ratio, 1  | ND   | ND   | ND   | ND   | ND      |
|               | R.QIQVNDDEDVR.L [49, 58]            | RAB23 peptide ratio, 2  | 2.82 | 0.46 | 1.20 | 0.89 | 0.99    |
|               | K.EDLNVNEVF.K.Y [153, 162]          | RAB23 peptide ratio, 3  | 1.33 | 0.82 | 1.25 | 1.08 | 0.22    |
| <b>RAB1B</b>  |                                     | RAB1B protein ratio     |      |      |      | ND   | #DIV/0! |
|               | -.MNPEYDYLFK.L [0, 9]               | RAB1B peptide ratio, 1  | ND   | ND   | ND   | ND   | ND      |
|               | K.NATNVEQAFMTMAAEIK.K [153, 168]    | RAB1B peptide ratio, 2  | ND   | ND   | ND   | ND   | ND      |
|               | R.MGPGAASGGERP.NLK.I [172, 186]     | RAB1B peptide ratio, 3  | ND   | ND   | ND   | ND   | ND      |
| <b>RABL2B</b> |                                     | RABL2B protein ratio    |      |      |      | 0.56 | #DIV/0! |
|               | K.AHACIMVFDVQR.K [93, 104]          | RABL2B peptide ratio, 1 | 1.00 | 0.59 | 0.38 | 0.56 | 0.26    |
| <b>RAP2C</b>  |                                     | RAP2C protein ratio     |      |      |      | ND   | #DIV/0! |
|               | K.VPLILVGNK.V [108, 116]            | RAP2C peptide ratio, 1  | ND   | ND   | ND   | ND   | ND      |
|               | K.VDLEPER.E [117, 123]              | RAP2C peptide ratio, 2  | ND   | ND   | ND   | ND   | ND      |
|               | R.EVMSSEGR.A [124, 131]             | RAP2C peptide ratio, 3  | ND   | ND   | ND   | ND   | ND      |
|               | R.ALAQEWGCPFMETSAK.S [132, 147]     | RAP2C peptide ratio, 4  | ND   | ND   | ND   | ND   | ND      |
|               | R.QMNYSSLPEK.Q [162, 171]           | RAP2C peptide ratio, 5  | ND   | ND   | ND   | ND   | ND      |
| <b>RHO</b>    |                                     | RHO protein ratio       |      |      |      | ND   | #DIV/0! |
|               | K.CVLVGDGAVGK.T [51, 61]            | RHO peptide ratio, 1    | ND   | ND   | ND   | ND   | ND      |
| <b>RABL5</b>  |                                     | RABL5 protein ratio     |      |      |      | 0.58 | #DIV/0! |
|               | K.ILFVGPCESGK.T [5, 15]             | RABL5 peptide ratio, 1  | 0.43 | 0.32 | 0.48 | 0.40 | 0.07    |
|               | R.ILEFENPHVTSNNK.G [39, 52]         | RABL5 peptide ratio, 2  | 0.48 | 0.45 | 0.25 | 0.36 | 0.10    |
|               | K.FESCWPALMK.D [69, 78]             | RABL5 peptide ratio, 3  | 1.53 | 0.56 | 0.52 | 0.69 | 0.47    |
|               | K.SIINSMSES.R.D [166, 175]          | RABL5 peptide ratio, 4  | 2.57 | 1.13 | 0.75 | 1.15 | 0.78    |
| <b>RRAGD</b>  |                                     | RRAGD protein ratio     |      |      |      | ND   | #DIV/0! |
|               | K.MSPNETLFLESTNK.I [85, 98]         | RRAGD peptide ratio, 1  | ND   | ND   | ND   | ND   | ND      |
|               | K.LNNTTVLYLK.E [320, 329]           | RRAGD peptide ratio, 2  | ND   | ND   | ND   | ND   | ND      |
| <b>ARL4C</b>  |                                     | ARL4C protein ratio     |      |      |      | ND   | #DIV/0! |
|               | K.GISCHFWDVGGQEK.L [60, 73]         | ARL4C peptide ratio, 1  | ND   | ND   | ND   | ND   | ND      |
|               | K.FAENQGTPLLVIANK.Q [113, 127]      | ARL4C peptide ratio, 2  | ND   | ND   | ND   | ND   | ND      |
|               | K.LYEMILK.R [174, 180]              | ARL4C peptide ratio, 3  | ND   | ND   | ND   | ND   | ND      |
| <b>RAC2</b>   |                                     | RAC2 protein ratio      |      |      |      | ND   | #DIV/0! |
|               | R.HHC.PSTPIILVGT.K.L [102, 115]     | RAC2 peptide ratio, 1   | ND   | ND   | ND   | ND   | ND      |
|               | K.LAPITYPQGLALAK.E [133, 146]       | RAC2 peptide ratio, 2   | ND   | ND   | ND   | ND   | ND      |
|               | R.AVLCPQPTR.Q [174, 182]            | RAC2 peptide ratio, 3   | ND   | ND   | ND   | ND   | ND      |
| <b>RAC1</b>   |                                     | RAC1 protein ratio      |      |      |      | 0.63 | #DIV/0! |
|               | R.HHC.PNTPIILVGT.K.L [102, 115]     | RAC1 peptide ratio, 1   | 0.75 | 0.48 | 1.26 | 0.71 | 0.33    |
|               | K.LTPITYPQGLAMAK.E [133, 146]       | RAC1 peptide ratio, 2   | 0.49 | 0.42 | 1.69 | 0.60 | 0.59    |
|               | K.LTPITYPQGLAMAK.E [133, 146]       | RAC1 peptide ratio, 3   | 0.44 | 0.65 | 8.20 | 0.76 | 3.61    |
| <b>RRAGB</b>  |                                     | RRAGB protein ratio     |      |      |      | 0.76 | #DIV/0! |
|               | R.SIIFANYIAR.D [57, 66]             | RRAGB peptide ratio, 1  | 3.51 | 1.29 | 1.03 | 1.48 | 1.11    |
|               | R.NFAEIIAEDEVLLFER.A [253, 268]     | RRAGB peptide ratio, 2  | 0.85 | 0.64 | 0.55 | 0.66 | 0.12    |
|               | K.LAASFQSMEVR.N [305, 315]          | RRAGB peptide ratio, 3  | 2.51 | 1.31 | 0.20 | 0.49 | 0.94    |
| <b>RAB27B</b> |                                     | RAB27B protein ratio    |      |      |      | ND   | #DIV/0! |
|               | K.LLALGDSGVGK.T [11, 21]            | RAB27B peptide ratio, 1 | ND   | ND   | ND   | ND   | ND      |
|               | R.VVYNAQGPNGSSGK.A [50, 63]         | RAB27B peptide ratio, 2 | ND   | ND   | ND   | ND   | ND      |
|               | K.VHLQLWDTAGQER.F [67, 79]          | RAB27B peptide ratio, 3 | ND   | ND   | ND   | ND   | ND      |
|               | K.YGIPYFETSAATGQNVEK.A [154, 169]   | RAB27B peptide ratio, 4 | ND   | ND   | ND   | ND   | ND      |
| <b>RHOD</b>   |                                     | RHOD protein ratio      |      |      |      | ND   | #DIV/0! |
|               | K.GKPVHLHIWDTAGQDDYDR.L [61, 74]    | RHOD peptide ratio, 1   | ND   | ND   | ND   | ND   | ND      |
|               | R.WYPEVNHFC.K.K [110, 119]          | RHOD peptide ratio, 2   | ND   | ND   | ND   | ND   | ND      |

|               |                                    |                         |      |      |      |      |         |
|---------------|------------------------------------|-------------------------|------|------|------|------|---------|
|               | R.SVGAVAYLECSAR.L [161, 173]       | RHOD peptide ratio, 3   | ND   | ND   | ND   | ND   | ND      |
| <b>RHOQ</b>   |                                    | RHOQ protein ratio      |      |      |      | ND   | #DIV/0! |
|               | K.EEWVPELK.E [100, 107]            | RHOQ peptide ratio, 1   | ND   | ND   | ND   | ND   | ND      |
|               | K.EIGACCYVECSALTQK.G [153, 168]    | RHOQ peptide ratio, 2   | ND   | ND   | ND   | ND   | ND      |
|               | K.TVFDEAIIAILTPK.K [172, 185]      | RHOQ peptide ratio, 3   | ND   | ND   | ND   | ND   | ND      |
| <b>RRAS2</b>  |                                    | RRAS2 protein ratio     |      |      |      | 1.14 | #DIV/0! |
|               | R.LVVVGGGGVGVK.S [16, 26]          | RRAS2 peptide ratio, 1  | 2.57 | 1.97 | 0.66 | 1.24 | 0.80    |
|               | R.LDILDTAGQEEFGAMR.E [69, 84]      | RRAS2 peptide ratio, 2  | ND   | ND   | ND   | ND   | ND      |
|               | R.TGEGFLLVFSVTDGR.G [90, 103]      | RRAS2 peptide ratio, 3  | ND   | ND   | ND   | ND   | ND      |
|               | R.QVTQEEGQQLAR.Q [141, 152]        | RRAS2 peptide ratio, 4  | 1.67 | 1.21 | 1.21 | 1.33 | 0.22    |
| <b>RAB31</b>  |                                    | RAB31 protein ratio     |      |      |      | 0.52 | #DIV/0! |
|               | R.FHSLAPMYR.G [67, 76]             | RAB31 peptide ratio, 1  | 0.44 | 0.43 | 0.09 | 0.19 | 0.16    |
|               | R.GSAAAVIVYDITK.Q [77, 89]         | RAB31 peptide ratio, 2  | 0.75 | 0.51 | 0.42 | 0.53 | 0.14    |
|               | K.QDSFYTLK.K [90, 97]              | RAB31 peptide ratio, 3  | 0.76 | 1.00 | 0.97 | 0.90 | 0.10    |
| <b>RAB32</b>  |                                    | RAB32 protein ratio     |      |      |      | 1.99 | #DIV/0! |
|               | K.VLVIGELGVGK.T [27, 37]           | RAB32 peptide ratio, 1  | 3.28 | 3.69 | 7.95 | 4.27 | 2.11    |
|               | R.SSTFEAVLK.W [110, 118]           | RAB32 peptide ratio, 2  | 2.65 | 2.21 | 1.34 | 1.91 | 0.55    |
|               | K.DNINIEEAAR.F [176, 185]          | RAB32 peptide ratio, 3  | 2.30 | 2.64 | 2.48 | 2.46 | 0.14    |
| <b>RAB18</b>  |                                    | RAB18 protein ratio     |      |      |      | 1.09 | #DIV/0! |
|               | K.ILIIGESGVGK.S [10, 20]           | RAB18 peptide ratio, 1  | 1.16 | 0.98 | 1.34 | 1.14 | 0.15    |
|               | K.LAIWDTAGQER.F [58, 68]           | RAB18 peptide ratio, 2  | 1.17 | 1.16 | 0.84 | 1.03 | 0.15    |
|               | R.TLTPSYR.G [71, 78]               | RAB18 peptide ratio, 3  | 0.97 | 0.96 | 1.40 | 1.08 | 0.21    |
|               | R.NDIVNMLVGNK.I [112, 122]         | RAB18 peptide ratio, 4  | 0.40 | 0.72 | 0.66 | 0.56 | 0.14    |
| <b>RAB9B</b>  |                                    | RAB9B protein ratio     |      |      |      | 0.57 | #DIV/0! |
|               | K.VILLGDGGVGVK.S [9, 19]           | RAB9B peptide ratio, 1  | 0.51 | 0.57 | 0.86 | 0.62 | 0.15    |
|               | R.QSFENLGNWQK.E [92, 102]          | RAB9B peptide ratio, 2  | 0.51 | 0.53 | 0.67 | 0.56 | 0.07    |
|               | K.EFIYYADV.K.D [103, 111]          | RAB9B peptide ratio, 3  | ND   | ND   | ND   | ND   | ND      |
| <b>RAP1B</b>  |                                    | RAP1B protein ratio     |      |      |      | 1.20 | #DIV/0! |
|               | K.DTDDVPMILVGNK.C [104, 116]       | RAP1B peptide ratio, 1  | 1.40 | 1.97 | 1.26 | 1.49 | 0.30    |
|               | K.DTDDVPMILVGNK.C [104, 116]       | RAP1B peptide ratio, 2  | ND   | ND   | ND   | ND   | ND      |
|               | R.QWNNCAFLESSAK.S [136, 148]       | RAP1B peptide ratio, 3  | 1.34 | 1.23 | 1.50 | 1.35 | 0.11    |
| <b>ARFRP1</b> |                                    | ARFRP1 protein ratio    |      |      |      | 1.06 | #DIV/0! |
|               | K.TTFLEQSK.T [30, 37]              | ARFRP1 peptide ratio, 1 | 0.92 | 1.07 | 1.23 | 1.06 | 0.13    |
|               | K.ITTTVGLNIGTVDVGK.A [52, 67]      | ARFRP1 peptide ratio, 2 | ND   | ND   | ND   | ND   | ND      |
|               | K.QDVETCLSIDIK.T [135, 147]        | ARFRP1 peptide ratio, 3 | ND   | ND   | ND   | ND   | ND      |
|               | K.TAFSDCTSK.I [148, 156]           | ARFRP1 peptide ratio, 4 | ND   | ND   | ND   | ND   | ND      |
|               | R.DCLTQACCSALTGK.G [161, 173]      | ARFRP1 peptide ratio, 5 | ND   | ND   | ND   | ND   | ND      |
| <b>RAB20</b>  |                                    | RAB20 protein ratio     |      |      |      | ND   | #DIV/0! |
|               | K.IVLLGDMNVGK.T [7, 17]            | RAB20 peptide ratio, 1  | ND   | ND   | ND   | ND   | ND      |
|               | R.GAAIILTYDVNHR.Q [71, 84]         | RAB20 peptide ratio, 2  | ND   | ND   | ND   | ND   | ND      |
|               | R.FLGLTDTASK.D [94, 103]           | RAB20 peptide ratio, 3  | ND   | ND   | ND   | ND   | ND      |
|               | K.QVQLEDAVALYK.K [147, 158]        | RAB20 peptide ratio, 4  | ND   | ND   | ND   | ND   | ND      |
| <b>SAR1A</b>  |                                    | SAR1A protein ratio     |      |      |      | 0.56 | #DIV/0! |
|               | K.NYLPAINGIVFLVDCADHSR.L [87, 100] | SAR1A peptide ratio, 1  | 1.08 | 1.07 | 0.97 | 1.04 | 0.05    |
|               | R.TDAISEEK.L [138, 145]            | SAR1A peptide ratio, 2  | 4.40 | 3.94 | 0.93 | 1.93 | 1.54    |
|               | R.EIFGLYGQTTGK.G [148, 159]        | SAR1A peptide ratio, 3  | 0.39 | 0.40 | 0.92 | 0.49 | 0.25    |
| <b>RAB5C</b>  |                                    | RAB5C protein ratio     |      |      |      | 0.50 | #DIV/0! |
|               | R.QASPNIVIALAGNK.A [121, 134]      | RAB5C peptide ratio, 1  | 6.44 | 1.05 | 0.24 | 0.57 | 2.75    |
|               | K.NEPQATGAPGR.N [184, 195]         | RAB5C peptide ratio, 2  | 0.94 | 2.21 | 0.27 | 0.58 | 0.80    |
|               | R.GVDLQENNPASR.S [198, 209]        | RAB5C peptide ratio, 3  | 0.42 | 0.51 | 0.30 | 0.39 | 0.09    |
| <b>RAB7A</b>  |                                    | RAB7A protein ratio     |      |      |      | 1.07 | #DIV/0! |
|               | R.FQSLGVAFYR.G [69, 78]            | RAB7A peptide ratio, 1  | 0.81 | 0.99 | 0.98 | 0.92 | 0.08    |
|               | R.DEFLIQASPR.D [103, 112]          | RAB7A peptide ratio, 2  | ND   | ND   | ND   | ND   | ND      |
|               | R.AQAWCYSK.N [138, 145]            | RAB7A peptide ratio, 3  | 0.83 | 0.95 | 0.88 | 0.88 | 0.05    |
|               | K.NNIPYFETSAK.E [146, 156]         | RAB7A peptide ratio, 4  | 0.80 | 0.82 | 1.48 | 0.95 | 0.32    |
| <b>RAB9A</b>  |                                    | RAB9A protein ratio     |      |      |      | 0.56 | #DIV/0! |
|               | R.QVSTEEAQAWCR.D [131, 142]        | RAB9A peptide ratio, 1  | 0.61 | 0.50 | 0.21 | 0.35 | 0.17    |
|               | K.DATNVAAAFEEAVR.R [156, 169]      | RAB9A peptide ratio, 2  | 5.96 | 4.90 | 0.25 | 0.70 | 2.48    |
|               | R.SDHLIQTDTVNLHR.K [178, 191]      | RAB9A peptide ratio, 3  | 0.15 | 4.50 | 0.43 | 0.33 | 1.99    |
| <b>RAB13</b>  |                                    | RAB13 protein ratio     |      |      |      | 0.98 | #DIV/0! |
|               | K.LQVWDTAGQER.F [58, 68]           | RAB13 peptide ratio, 1  | 0.93 | 0.95 | 1.01 | 0.96 | 0.04    |
|               | K.SFENIQNWMK.S [94, 103]           | RAB13 peptide ratio, 2  | 0.54 | 0.50 | 1.29 | 0.65 | 0.36    |
|               | K.ENASAGVER.L [107, 115]           | RAB13 peptide ratio, 3  | 1.33 | 2.12 | 0.90 | 1.29 | 0.50    |
| <b>RAB28</b>  |                                    | RAB28 protein ratio     |      |      |      | 1.13 | #DIV/0! |
|               | K.IVVLGDGASGK.T [14, 24]           | RAB28 peptide ratio, 1  | 0.72 | 0.73 | 0.87 | 0.77 | 0.07    |
|               | K.TSLTTCFAQETFGK.Q [25, 38]        | RAB28 peptide ratio, 2  | 1.88 | 2.30 | 0.97 | 1.50 | 0.56    |
|               | K.VSEESQPLVALVGNK.I [113, 129]     | RAB28 peptide ratio, 3  | ND   | ND   | ND   | ND   | ND      |
|               | K.VAAEILGK.L [172, 180]            | RAB28 peptide ratio, 4  | 1.34 | 1.06 | 1.14 | 1.17 | 0.12    |
|               | K.AEIEQSQR.V [184, 191]            | RAB28 peptide ratio, 5  | 0.78 | 0.78 | 0.76 | 0.77 | 0.01    |
| <b>RAB27A</b> |                                    | RAB27A protein ratio    |      |      |      | 1.09 | #DIV/0! |
|               | K.FLALGDSGVGK.T [11, 21]           | RAB27A peptide ratio, 1 | 1.07 | 1.16 | 1.17 | 1.13 | 0.05    |
|               | K.TSVLYQYTDGK.F [22, 32]           | RAB27A peptide ratio, 2 | 1.17 | 1.01 | 1.28 | 1.15 | 0.11    |
|               | R.IHLQLWDTAGQER.F [67, 79]         | RAB27A peptide ratio, 3 | ND   | ND   | ND   | ND   | ND      |
|               | K.SDLEDQR.V [134, 140]             | RAB27A peptide ratio, 4 | ND   | ND   | ND   | ND   | ND      |

|                |                                   |                          |       |       |      |      |         |
|----------------|-----------------------------------|--------------------------|-------|-------|------|------|---------|
|                | K.SWIPEGVVR.S [191, 199]          | RAB27A peptide ratio, 5  | 1.33  | 1.14  | 1.17 | 1.21 | 0.08    |
| <b>RAB10</b>   |                                   | RAB10 protein ratio      |       |       |      | 1.02 | #DIV/0! |
|                | K.TYDLLFK.L [4, 10]               | RAB10 peptide ratio, 1   | 1.12  | 1.16  | 0.96 | 1.07 | 0.09    |
|                | R.FHTITTSYYR.G [70, 79]           | RAB10 peptide ratio, 2   | 1.47  | 1.41  | 0.48 | 0.87 | 0.45    |
|                | R.NIDEHANEDVER.M [105, 116]       | RAB10 peptide ratio, 3   | 1.39  | 4.60  | 0.53 | 1.07 | 1.75    |
| <b>RHEB</b>    |                                   | RHEB protein ratio       |       |       |      | 0.69 | #DIV/0! |
|                | K.IAILGYR.S [8, 14]               | RHEB peptide ratio, 1    | ND    | ND    | ND   | ND   | ND      |
|                | K.VQIPIMLVGNK.K [109, 119]        | RHEB peptide ratio, 2    | ND    | ND    | ND   | ND   | ND      |
|                | K.ALAESWNAAFLESSAK.E [135, 150]   | RHEB peptide ratio, 3    | ND    | ND    | ND   | ND   | ND      |
|                | K.ENQTAVDVFR.R [151, 160]         | RHEB peptide ratio, 4    | 0.68  | 0.68  | 0.70 | 0.69 | 0.01    |
| <b>CDC42</b>   |                                   | CDC42 protein ratio      |       |       |      | 0.99 | #DIV/0! |
| Isoform 2      | K.YVECSALTQK.G [153, 162]         | CDC42 peptide ratio, 1   | 1.06  | 1.10  | 1.09 | 1.08 | 0.02    |
| Isoform 2      | K.NVFDEAILAALPEPEPK.K [166, 182]  | CDC42 peptide ratio, 2   | 1.82  | 1.07  | 0.41 | 0.76 | 0.58    |
| <b>RAB6B</b>   |                                   | RAB6B protein ratio      |       |       |      | 1.70 | #DIV/0! |
|                | R.QITIEEGEQR.A [134, 143]         | RAB6B peptide ratio, 1   | 2.04  | 2.17  | 1.22 | 1.69 | 0.42    |
|                | K.ELSMFIETSAK.T [146, 157]        | RAB6B peptide ratio, 2   | 1.62  | 2.89  | 1.51 | 1.85 | 0.62    |
|                | R.VASALPGMENVQEK.S [169, 182]     | RAB6B peptide ratio, 3   | ND    | ND    | ND   | ND   | ND      |
|                | R.VASALPGMENVQEK.S [169, 182]     | RAB6B peptide ratio, 4   | ND    | ND    | ND   | ND   | ND      |
| <b>RHOG</b>    |                                   | RHOG protein ratio       |       |       |      | 1.33 | #DIV/0! |
|                | R.TVNLNLWDTAGQEEYDR.L [49, 65]    | RHOG peptide ratio, 1    | ND    | ND    | ND   | ND   | ND      |
|                | K.EQGQAPITPQQGQALAK.Q [130, 146]  | RHOG peptide ratio, 2    | 4.74  | 1.27  | 0.80 | 1.33 | 1.76    |
|                | R.YLECSALQQDGVK.E [153, 165]      | RHOG peptide ratio, 3    | 1.23  | 1.29  | 2.31 | 1.48 | 0.49    |
| <b>RAB5B</b>   |                                   | RAB5B protein ratio      |       |       |      | 0.87 | #DIV/0! |
|                | R.QASPSIVIALAGNK.A [120, 133]     | RAB5B peptide ratio, 1   | 1.09  | 1.14  | 1.04 | 1.09 | 0.04    |
|                | K.TAMNVNDLFLAIK.K [165, 178]      | RAB5B peptide ratio, 2   | 1.01  | 0.91  | 0.63 | 0.82 | 0.16    |
|                | K.SEPQNLGGAAGR.S [183, 194]       | RAB5B peptide ratio, 3   | ND    | ND    | ND   | ND   | ND      |
|                | R.GVDLHEQSQQNK.S [197, 208]       | RAB5B peptide ratio, 4   | ND    | ND    | ND   | ND   | ND      |
| <b>RAP2B</b>   |                                   | RAP2B protein ratio      |       |       |      | 0.96 | #DIV/0! |
|                | R.VPMILVGNK.V [108, 116]          | RAP2B peptide ratio, 1   | 0.61  | 0.80  | 0.95 | 0.76 | 0.14    |
|                | R.VPMILVGNK.V [108, 116]          | RAP2B peptide ratio, 2   | 0.95  | 0.91  | 0.82 | 0.89 | 0.05    |
|                | K.VDLEGER.E [117, 123]            | RAP2B peptide ratio, 3   | ND    | ND    | ND   | ND   | ND      |
|                | K.ASVDELFAEIVR.Q [150, 161]       | RAP2B peptide ratio, 4   | 1.94  | 1.13  | 1.31 | 1.39 | 0.35    |
| <b>ARL8B</b>   |                                   | ARL8B protein ratio      |       |       |      | 0.89 | #DIV/0! |
|                | R.DLPNALDEK.Q [184, 192]          | ARL8B peptide ratio, 1   | 0.69  | 0.67  | 1.26 | 0.80 | 0.27    |
|                | K.MNLSAIQDR.E [198, 206]          | ARL8B peptide ratio, 2   | 0.75  | 0.83  | 1.37 | 0.92 | 0.27    |
|                | R.EICCYSSISCK.E [207, 216]        | ARL8B peptide ratio, 3   | 0.86  | 0.80  | 0.51 | 0.69 | 0.15    |
| <b>RHOH</b>    |                                   | RHOH protein ratio       |       |       |      | ND   | #DIV/0! |
|                | R.SNLPCTPVLVVATQTDQR.E [103, 119] | RHOH peptide ratio, 1    | ND    | ND    | ND   | ND   | ND      |
|                | R.ASCVNAMEGK.K [127, 136]         | RHOH peptide ratio, 2    | ND    | ND    | ND   | ND   | ND      |
|                | K.GYLECSALSNR.G [146, 156]        | RHOH peptide ratio, 3    | ND    | ND    | ND   | ND   | ND      |
|                | R.GVQQVFEC AVR.T [157, 167]       | RHOH peptide ratio, 4    | ND    | ND    | ND   | ND   | ND      |
| <b>RAP1A</b>   |                                   | RAP1A protein ratio      |       |       |      | 0.65 | #DIV/0! |
|                | R.VKDTEDEVPMILVGNK.C [102, 116]   | RAP1A peptide ratio, 1   | 34.97 | 17.70 | 0.26 | 0.77 | 14.17   |
|                | R.VKDTEDEVPMILVGNK.C [102, 116]   | RAP1A peptide ratio, 2   | 1.90  | 3.69  | 0.24 | 0.61 | 1.41    |
|                | K.DTEDEVPMILVGNK.C [104, 116]     | RAP1A peptide ratio, 3   | 1.98  | 6.32  | 0.25 | 0.64 | 2.55    |
|                | R.QWCNCAFLESSAK.S [136, 148]      | RAP1A peptide ratio, 4   | ND    | ND    | ND   | ND   | ND      |
| <b>RAP2A</b>   |                                   | RAP2A protein ratio      |       |       |      | 0.88 | #DIV/0! |
|                | K.VPVILVGNK.V [108, 116]          | RAP2A peptide ratio, 1   | ND    | ND    | ND   | ND   | ND      |
|                | R.ALAEWGC PFMETSAK.S [132, 147]   | RAP2A peptide ratio, 2   | 0.84  | 1.12  | 0.83 | 0.91 | 0.13    |
|                | K.TMVDELFAEIVR.Q [150, 161]       | RAP2A peptide ratio, 3   | 0.86  | 0.89  | 0.75 | 0.83 | 0.06    |
| <b>RRAS</b>    |                                   | RRAS protein ratio       |       |       |      | 1.61 | #DIV/0! |
|                | K.ICSVDGIPAR.L [68, 77]           | RRAS peptide ratio, 1    | 1.39  | 1.44  | 1.44 | 1.42 | 0.02    |
|                | R.QSFNEVGK.L [113, 120]           | RRAS peptide ratio, 2    | ND    | ND    | ND   | ND   | ND      |
|                | K.LFTQILR.V [121, 127]            | RRAS peptide ratio, 3    | 1.60  | 1.58  | 1.46 | 1.54 | 0.07    |
|                | K.ADLESQR.Q [143, 149]            | RRAS peptide ratio, 4    | ND    | ND    | ND   | ND   | ND      |
| <b>RAB11B</b>  |                                   | RAB11B protein ratio     |       |       |      | 0.90 | #DIV/0! |
|                | K.AQIWDTAGQER.Y [61, 71]          | RAB11B peptide ratio, 1  | 0.86  | 0.87  | 1.04 | 0.92 | 0.08    |
|                | R.GAVGALLVYDIK.H [82, 94]         | RAB11B peptide ratio, 2  | 1.71  | 0.40  | 0.60 | 0.63 | 0.58    |
|                | K.NILTEIYR.I [166, 173]           | RAB11B peptide ratio, 3  | ND    | ND    | ND   | ND   | ND      |
| <b>NKIRAS2</b> |                                   | NKIRAS2 protein ratio    |       |       |      | 0.76 | #DIV/0! |
|                | K.VVVCQGQASVKG.T [6, 16]          | NKIRAS2 peptide ratio, 1 | 3.03  | 0.80  | 0.87 | 1.09 | 1.04    |
|                | K.EVTIVVLGNK.C [111, 120]         | NKIRAS2 peptide ratio, 2 | 0.45  | 0.98  | 0.74 | 0.66 | 0.21    |
|                | R.VDPDVAQHWAK.S [129, 139]        | NKIRAS2 peptide ratio, 3 | 1.15  | 0.48  | 1.24 | 0.80 | 0.34    |
|                | R.SLLEPFVYLASK.M [155, 166]       | NKIRAS2 peptide ratio, 4 | 0.98  | 0.68  | 1.08 | 0.88 | 0.17    |
| <b>RAB33B</b>  |                                   | RAB33B protein ratio     |       |       |      | 1.01 | #DIV/0! |
|                | K.IIVIGDSNVGK.T [35, 45]          | RAB33B peptide ratio, 1  | 0.82  | 0.81  | 2.34 | 1.04 | 0.72    |
|                | R.AVEIDGER.I [73, 80]             | RAB33B peptide ratio, 2  | 3.97  | 0.35  | 9.12 | 0.94 | 3.60    |
|                | R.SAIQVPTDLAQK.F [153, 164]       | RAB33B peptide ratio, 3  | 1.15  | 0.59  | 6.51 | 1.11 | 2.67    |
| <b>ARL6</b>    |                                   | ARL6 protein ratio       |       |       |      | 1.24 | #DIV/0! |
|                | R.NLWEHYK.E [77, 84]              | ARL6 peptide ratio, 1    | ND    | ND    | ND   | ND   | ND      |
|                | K.EELDTLLNHPDIK.H [106, 118]      | ARL6 peptide ratio, 2    | 1.51  | 4.12  | 0.65 | 1.23 | 1.48    |
|                | R.IPILFFANK.M [122, 130]          | ARL6 peptide ratio, 3    | 1.30  | 1.95  | 0.90 | 1.26 | 0.43    |
|                | K.VSQLLCLENIK.D [142, 152]        | ARL6 peptide ratio, 4    | 1.06  | 1.23  | 1.19 | 1.16 | 0.07    |
| <b>RAC3</b>    |                                   | RAC3 protein ratio       |       |       |      | 0.87 | #DIV/0! |

|               |                                     |                         |       |       |      |      |         |
|---------------|-------------------------------------|-------------------------|-------|-------|------|------|---------|
|               | K.LAPITYPQGLAMAR.E [133, 146]       | RAC3 peptide ratio, 1   | 2.71  | 4.12  | 0.24 | 0.63 | 1.60    |
|               | K.LAPITYPQGLAMAR.E [133, 146]       | RAC3 peptide ratio, 2   | 1.41  | 1.97  | 1.71 | 1.67 | 0.23    |
|               | R.AVLCPPPVK.K [174, 182]            | RAC3 peptide ratio, 3   | 0.64  | 0.64  | 1.52 | 0.80 | 0.42    |
| <b>RAB3A</b>  |                                     | RAB3A protein ratio     |       |       |      | 0.64 | #DIV/0! |
|               | K.ESSDQNFDFYMF.K.I [12, 23]         | RAB3A peptide ratio, 1  | 0.41  | 0.61  | 0.12 | 0.24 | 0.20    |
|               | K.TYSWDNAQVLLVGNK.C [121, 135]      | RAB3A peptide ratio, 2  | 0.37  | 0.46  | 0.97 | 0.51 | 0.27    |
|               | R.LVDVIC.EK.M [178, 185]            | RAB3A peptide ratio, 3  | 0.69  | 0.75  | 0.89 | 0.77 | 0.08    |
|               | K.MSESLDTADPAVTGAK.Q [186, 201]     | RAB3A peptide ratio, 4  | 6.00  | 1.96  | 0.23 | 0.59 | 2.42    |
| <b>RAB5A</b>  |                                     | RAB5A protein ratio     |       |       |      | 0.56 | #DIV/0! |
|               | R.QASPNIVIALSGNK.A [120, 133]       | RAB5A peptide ratio, 1  | 0.99  | 0.89  | 1.15 | 1.00 | 0.11    |
|               | K.NEPQNPANSAR.G [183, 194]          | RAB5A peptide ratio, 2  | 0.60  | 0.66  | 0.74 | 0.66 | 0.06    |
|               | R.GVDLTEPTQPTR.N [197, 208]         | RAB5A peptide ratio, 3  | 0.49  | 0.44  | 0.71 | 0.52 | 0.12    |
| <b>RAB6C</b>  |                                     | RAB6C protein ratio     |       |       |      | ND   | #DIV/0! |
|               | R.QVSIEEGER.K [134, 142]            | RAB6C peptide ratio, 1  | ND    | ND    | ND   | ND   | ND      |
|               | K.ELNVMFIETSAK.A [146, 157]         | RAB6C peptide ratio, 2  | ND    | ND    | ND   | ND   | ND      |
|               | R.VAAALPGMESTQDR.S [169, 182]       | RAB6C peptide ratio, 3  | 0.94  | 1.12  | 0.96 | 1.00 | 0.08    |
| <b>MRAS</b>   |                                     | MRAS protein ratio      |       |       |      | ND   | #DIV/0! |
|               | K.IFVPDYDPTIEDSYLK.H [36, 51]       | MRAS peptide ratio, 1   | ND    | ND    | ND   | ND   | ND      |
| <b>RAB8B</b>  |                                     | RAB8B protein ratio     |       |       |      | ND   | #DIV/0! |
|               | R.NIEEHASSDVER.M [104, 115]         | RAB8B peptide ratio, 1  | ND    | ND    | ND   | ND   | ND      |
|               | K.SSANVEEAFFTLAR.D [153, 166]       | RAB8B peptide ratio, 2  | ND    | ND    | ND   | ND   | ND      |
|               | K.MNDSNSAGAGGPVK.I [176, 189]       | RAB8B peptide ratio, 3  | ND    | ND    | ND   | ND   | ND      |
|               | K.MNDSNSAGAGGPVK.I [176, 189]       | RAB8B peptide ratio, 4  | ND    | ND    | ND   | ND   | ND      |
| <b>RAB7L1</b> |                                     | RAB7L1 protein ratio    |       |       |      | 0.91 | #DIV/0! |
|               | K.VLQWSDYEIVR.L [47, 57]            | RAB7L1 peptide ratio, 1 | 1.37  | 1.71  | 0.64 | 1.04 | 0.45    |
|               | K.CDLSPWAVSR.D [126, 135]           | RAB7L1 peptide ratio, 2 | ND    | ND    | ND   | ND   | ND      |
|               | K.ENGFTGWTETSVK.E [144, 156]        | RAB7L1 peptide ratio, 3 | 0.84  | 0.70  | 1.13 | 0.86 | 0.18    |
| <b>RHOC</b>   |                                     | RHOC protein ratio      |       |       |      | 1.65 | #DIV/0! |
|               | K.HFCPNVPIILVGNK.K [104, 117]       | RHOC peptide ratio, 1   | 0.73  | 0.92  | 1.35 | 0.94 | 0.26    |
|               | K.HFCPNVPIILVGNKK.D [104, 118] (n   | RHOC peptide ratio, 2   | 1.72  | 0.74  | 1.32 | 1.12 | 0.40    |
|               | R.ISAFGYLECSAK.T [150, 161]         | RHOC peptide ratio, 3   | 1.10  | 1.05  | 1.09 | 1.08 | 0.02    |
| <b>RHOJ</b>   |                                     | RHOJ protein ratio      |       |       |      | ND   | #DIV/0! |
|               | K.AIGAQCYLECSALTQK.G [165, 180]     | RHOJ peptide ratio, 1   | ND    | ND    | ND   | ND   | ND      |
|               | K.AVFDEAILTIFHPK.K [184, 197]       | RHOJ peptide ratio, 2   | ND    | ND    | ND   | ND   | ND      |
| <b>RAB38</b>  |                                     | RAB38 protein ratio     |       |       |      | ND   | #DIV/0! |
|               | K.LLVIGDLGVGK.T [11, 21]            | RAB38 peptide ratio, 1  | ND    | ND    | ND   | ND   | ND      |
|               | K.VLHWDPETVVR.L [49, 59]            | RAB38 peptide ratio, 2  | ND    | ND    | ND   | ND   | ND      |
|               | K.LSLPNGKPVSVLLANK.C [111, 121]     | RAB38 peptide ratio, 3  | ND    | ND    | ND   | ND   | ND      |
|               | K.ENINIDEASR.C [161, 170]           | RAB38 peptide ratio, 4  | ND    | ND    | ND   | ND   | ND      |
| <b>RAB25</b>  |                                     | RAB25 protein ratio     |       |       |      | ND   | #DIV/0! |
|               | K.VVLIGESGVGK.T [14, 24]            | RAB25 peptide ratio, 1  | ND    | ND    | ND   | ND   | ND      |
|               | R.TTIGVEFSTR.T [42, 51]             | RAB25 peptide ratio, 2  | ND    | ND    | ND   | ND   | ND      |
|               | K.AQIWDTAGLER.Y [62, 72]            | RAB25 peptide ratio, 3  | ND    | ND    | ND   | ND   | ND      |
|               | R.EVPTTEEAR.M [133, 140]            | RAB25 peptide ratio, 4  | ND    | ND    | ND   | ND   | ND      |
| <b>RAB8A</b>  |                                     | RAB8A protein ratio     |       |       |      | 0.93 | #DIV/0! |
|               | R.NIEEHASADVEK.M [104, 115]         | RAB8A peptide ratio, 1  | 1.14  | 1.04  | 1.06 | 1.08 | 0.04    |
|               | K.LALDYGIK.F [138, 145]             | RAB8A peptide ratio, 2  | 0.73  | 0.71  | 1.40 | 0.86 | 0.32    |
|               | K.LEGNSPQGSNQGK.V.I [176, 189]      | RAB8A peptide ratio, 3  | ND    | ND    | ND   | ND   | ND      |
| <b>ARL4A</b>  |                                     | ARL4A protein ratio     |       |       |      | ND   | #DIV/0! |
|               | K.TVTFHFWDVGGQEK.L [67, 80]         | ARL4A peptide ratio, 1  | ND    | ND    | ND   | ND   | ND      |
|               | R.ISENQGVPLIVANK.Q [120, 134]       | ARL4A peptide ratio, 2  | ND    | ND    | ND   | ND   | ND      |
|               | R.NSLSLSEIEK.L [139, 148]           | ARL4A peptide ratio, 3  | ND    | ND    | ND   | ND   | ND      |
| <b>RAB6A</b>  |                                     | RAB6A protein ratio     |       |       |      | 1.14 | #DIV/0! |
|               | R.DSAAAVVYDITNVNSFQQTTK.W           | RAB6A peptide ratio, 1  | 1.66  | 0.76  | 0.71 | 0.90 | 0.43    |
|               | K.WIDDVTER.G [106, 114] (missed 1)  | RAB6A peptide ratio, 2  | 1.20  | 14.20 | 1.13 | 1.68 | 6.15    |
|               | R.TDLADKR.Q [127, 133] (missed 1)   | RAB6A peptide ratio, 3  | 0.76  | 1.12  | 1.18 | 0.98 | 0.19    |
| <b>RAB2A</b>  |                                     | RAB2A protein ratio     |       |       |      | 1.54 | #DIV/0! |
|               | R.MITIDGK.Q [46, 52]                | RAB2A peptide ratio, 1  | 1.33  | 1.49  | 1.59 | 1.46 | 0.11    |
|               | K.KEEGEAFAR.E [130, 138] (missed 1) | RAB2A peptide ratio, 2  | 1.20  | 0.81  | 1.65 | 1.13 | 0.34    |
|               | K.TASNVEEAFINTAK.E [151, 164]       | RAB2A peptide ratio, 3  | 1.65  | 1.60  | 1.15 | 1.43 | 0.22    |
|               | K.IQEGVFDINNEANGIK.I [170, 185]     | RAB2A peptide ratio, 4  | 1.87  | 5.53  | 1.54 | 2.20 | 1.81    |
| <b>RAB3D</b>  |                                     | RAB3D protein ratio     |       |       |      | 0.74 | #DIV/0! |
|               | R.DAADQNFDFYMF.K.L [12, 23]         | RAB3D peptide ratio, 1  | 12.80 | 19.69 | 0.85 | 2.30 | 7.78    |
|               | K.LLLIGNSSVGK.T [24, 34]            | RAB3D peptide ratio, 2  | 0.65  | 0.71  | 0.82 | 0.72 | 0.07    |
|               | R.LADDLGFEEFEASAK.E [152, 166]      | RAB3D peptide ratio, 3  | 1.33  | 1.53  | 0.61 | 0.98 | 0.39    |
| <b>RAB36</b>  |                                     | RAB36 protein ratio     |       |       |      | ND   | #DIV/0! |
|               | R.EHFHGQVSAACQR.R [100, 112]        | RAB36 peptide ratio, 1  | ND    | ND    | ND   | ND   | ND      |
|               | R.FEAGIPYSLQIWDTAGQEK.F [164, 177]  | RAB36 peptide ratio, 2  | ND    | ND    | ND   | ND   | ND      |
|               | R.VAALAFEQSVLQDLER.Q [282, 297]     | RAB36 peptide ratio, 3  | ND    | ND    | ND   | ND   | ND      |
| <b>RAN</b>    |                                     | RAN protein ratio       |       |       |      | 0.66 | #DIV/0! |
|               | K.LVLVGDGGTGK.T [12, 22]            | RAN peptide ratio, 1    | 0.72  | 0.73  | 0.88 | 0.77 | 0.07    |
|               | K.YVATLGVEVHPLVFHTNR.G [38, 55]     | RAN peptide ratio, 2    | 1.60  | 0.21  | 9.08 | 0.54 | 3.90    |
|               | K.NVPNWHR.D [99, 105]               | RAN peptide ratio, 3    | ND    | ND    | ND   | ND   | ND      |
| <b>RAB40C</b> |                                     | RAB40C protein ratio    |       |       |      | ND   | #DIV/0! |

|               |                                   |                         |      |      |      |      |         |
|---------------|-----------------------------------|-------------------------|------|------|------|------|---------|
|               | R.VFSLQDLCCR.A [188, 197]         | RAB40C peptide ratio, 1 | ND   | ND   | ND   | ND   | ND      |
|               | R.SYSLASGAGGGGSK.G [239, 252]     | RAB40C peptide ratio, 2 | ND   | ND   | ND   | ND   | ND      |
| <b>ARL11</b>  |                                   | ARL11 protein ratio     |      |      |      | ND   | #DIV/0! |
|               | R.GCSALTGEGEGLPEALQSLWSLLK.S      | ARL11 peptide ratio, 1  | ND   | ND   | ND   | ND   | ND      |
| <b>RAB24</b>  |                                   | RAB24 protein ratio     |      |      |      | ND   | #DIV/0! |
|               | R.SLEEGCQIYLCGTK.S [107, 120]     | RAB24 peptide ratio, 1  | ND   | ND   | ND   | ND   | ND      |
|               | R.VDFHVDVQDYADNIK.A [133, 146]    | RAB24 peptide ratio, 2  | ND   | ND   | ND   | ND   | ND      |
|               | K.AQLFETSSK.T [147, 155]          | RAB24 peptide ratio, 3  | ND   | ND   | ND   | ND   | ND      |
|               | K.TGQSVDELDFQK.V [156, 166]       | RAB24 peptide ratio, 4  | ND   | ND   | ND   | ND   | ND      |
| <b>RAB7B</b>  |                                   | RAB7B protein ratio     |      |      |      | 0.92 | #DIV/0! |
|               | K.IIILGDTTLK.L [48, 57]           | RAB7B peptide ratio, 1  | ND   | ND   | ND   | ND   | ND      |
|               | K.LQIWDVTGGQER.F [58, 68]         | RAB7B peptide ratio, 2  | 0.89 | 0.97 | 0.76 | 0.86 | 0.09    |
|               | R.YQSILENHLTESIK.L [174, 187]     | RAB7B peptide ratio, 3  | 1.52 | 0.71 | 0.89 | 0.94 | 0.35    |
| <b>ARL8A</b>  |                                   | ARL8A protein ratio     |      |      |      | ND   | #DIV/0! |
|               | K.LWDIGGQPR.F [68, 76]            | ARL8A peptide ratio, 1  | ND   | ND   | ND   | ND   | ND      |
|               | R.GVSAIVYMVDAADQEK.I [87, 102]    | ARL8A peptide ratio, 2  | ND   | ND   | ND   | ND   | ND      |
|               | R.DLPGALDEKELIEK.M [132, 145] (m  | ARL8A peptide ratio, 3  | ND   | ND   | ND   | ND   | ND      |
| <b>RAB39B</b> |                                   | RAB39B protein ratio    |      |      |      | ND   | #DIV/0! |
|               | R.SFQNVHEWLEETK.V [95, 107]       | RAB39B peptide ratio, 1 | ND   | ND   | ND   | ND   | ND      |
|               | K.CDLDTQR.Q [124, 130]            | RAB39B peptide ratio, 2 | ND   | ND   | ND   | ND   | ND      |
|               | K.LAAAYGMK.Y [140, 147]           | RAB39B peptide ratio, 3 | ND   | ND   | ND   | ND   | ND      |
|               | K.YIETSAR.D [148, 154]            | RAB39B peptide ratio, 4 | ND   | ND   | ND   | ND   | ND      |
|               | K.SGFVFPNVVHSSEEVK.S [190, 205]   | RAB39B peptide ratio, 5 | ND   | ND   | ND   | ND   | ND      |
| <b>DIRAS2</b> |                                   | DIRAS2 protein ratio    |      |      |      | ND   | #DIV/0! |
|               | R.VAVFGAGGVGK.S [9, 19]           | DIRAS2 peptide ratio, 1 | ND   | ND   | ND   | ND   | ND      |
|               | K.SICTLQITDTTGGSHQFPAMQR.L [52    | DIRAS2 peptide ratio, 2 | ND   | ND   | ND   | ND   | ND      |
| <b>RAB2B</b>  |                                   | RAB2B protein ratio     |      |      |      | 0.85 | #DIV/0! |
|               | R.ETFNHLTSWLEDAR.Q [26, 39]       | RAB2B peptide ratio, 1  | ND   | ND   | ND   | ND   | ND      |
|               | K.REEGEAFAR.E [65, 73] (missed 1) | RAB2B peptide ratio, 2  | 0.89 | 0.97 | 1.36 | 1.04 | 0.20    |
|               | K.TACNVVEAFINTAK.E [86, 99]       | RAB2B peptide ratio, 3  | 1.82 | 1.76 | 1.26 | 1.57 | 0.25    |
| <b>RAB37</b>  |                                   | RAB37 protein ratio     |      |      |      | ND   | #DIV/0! |
|               | R.SPPCSPSYDLTGK.V [18, 30]        | RAB37 peptide ratio, 1  | ND   | ND   | ND   | ND   | ND      |
|               | K.VMLLGDGTGVGK.T [31, 41]         | RAB37 peptide ratio, 2  | ND   | ND   | ND   | ND   | ND      |
|               | K.TCFLIQFK.D [42, 49]             | RAB37 peptide ratio, 3  | ND   | ND   | ND   | ND   | ND      |
|               | R.AGHQADEPSFQIR.D [194, 206]      | RAB37 peptide ratio, 4  | ND   | ND   | ND   | ND   | ND      |
| <b>ARL5B</b>  |                                   | ARL5B protein ratio     |      |      |      | 0.51 | #DIV/0! |
|               | K.LWSLFCNQEHK.V [7, 17]           | ARL5B peptide ratio, 1  | 0.74 | 0.97 | 0.56 | 0.72 | 0.17    |
|               | K.NTHFLMWDIGGQESLR.S [58, 73]     | ARL5B peptide ratio, 2  | 1.39 | 0.85 | 0.50 | 0.77 | 0.37    |
|               | K.AAVLIFANK.Q [117, 125]          | ARL5B peptide ratio, 3  | 0.65 | 0.66 | 0.74 | 0.68 | 0.04    |
|               | K.GCMTAAEISK.Y [130, 139]         | ARL5B peptide ratio, 4  | 1.48 | 0.84 | 1.04 | 1.06 | 0.27    |
| <b>RAB2B</b>  |                                   | RAB2B protein ratio     |      |      |      | 0.85 | #DIV/0! |
|               | R.MVNIDGK.Q [46, 52]              | RAB2B peptide ratio, 1  | 0.84 | 0.62 | 1.60 | 0.87 | 0.42    |
|               | K.IQQGLFDVHNEANGIK.I [170, 185]   | RAB2B peptide ratio, 2  | 0.53 | 1.06 | 1.18 | 0.82 | 0.28    |
|               | K.IGPQQSISTSVGSPASQR.N [186, 2    | RAB2B peptide ratio, 3  | 0.90 | 0.93 | 1.16 | 0.98 | 0.12    |
| <b>RABL3</b>  |                                   | RABL3 protein ratio     |      |      |      | 1.41 | #DIV/0! |
|               | R.WSLEALNR.D [108, 115]           | RABL3 peptide ratio, 1  | ND   | ND   | ND   | ND   | ND      |
|               | R.YLAAGSSNAVK.L [184, 194]        | RABL3 peptide ratio, 2  | 2.74 | 3.07 | 1.98 | 2.51 | 0.45    |
|               | R.EGNQIPGFPDR.K [211, 221]        | RABL3 peptide ratio, 3  | 0.80 | 0.85 | 3.50 | 1.10 | 1.26    |
| <b>RRAGA</b>  |                                   | RRAGA protein ratio     |      |      |      | ND   | #DIV/0! |
|               | R.LGATIDVEHSHVR.F [38, 50]        | RRAGA peptide ratio, 1  | ND   | ND   | ND   | ND   | ND      |
|               | R.NFAQIIEADEVLLFER.A [192, 207]   | RRAGA peptide ratio, 2  | ND   | ND   | ND   | ND   | ND      |
| <b>RABL6</b>  |                                   | RABL6 protein ratio     |      |      |      | ND   | #DIV/0! |
|               | K.LVGSQAPGR.D [7, 16]             | RABL6 peptide ratio, 1  | ND   | ND   | ND   | ND   | ND      |
|               | K.NIPAGLQSMNQALQR.R [19, 33]      | RABL6 peptide ratio, 2  | ND   | ND   | ND   | ND   | ND      |
|               | K.FFNIPFLQLQR.E [226, 236]        | RABL6 peptide ratio, 3  | ND   | ND   | ND   | ND   | ND      |
| <b>RAB4B</b>  |                                   | RAB4B protein ratio     |      |      |      | 0.74 | #DIV/0! |
|               | K.FLVIGSAGTGK.S [45, 55]          | RAB4B peptide ratio, 1  | ND   | ND   | ND   | ND   | ND      |
|               | K.SCLLHQFIENK.F [56, 66]          | RAB4B peptide ratio, 2  | 1.73 | 3.55 | 0.57 | 1.15 | 1.23    |
|               | K.IDSGELDPER.M [207, 216]         | RAB4B peptide ratio, 3  | 0.67 | 0.54 | 0.66 | 0.62 | 0.06    |
|               | R.MGSGIQYGDAASLR.Q [217, 229]     | RAB4B peptide ratio, 4  | 3.05 | 6.82 | 0.24 | 0.65 | 2.69    |
| <b>ARF1</b>   |                                   | ARF1 protein ratio      |      |      |      | 0.84 | #DIV/0! |
|               | K.NISFTVWDVGGQDK.I [59, 72]       | ARF1 peptide ratio, 1   | 0.96 | 0.92 | 0.91 | 0.93 | 0.02    |
|               | K.QDLPNAMNAAEITDK.L [127, 141]    | ARF1 peptide ratio, 2   | 1.67 | 2.07 | 0.65 | 1.14 | 0.60    |
|               | K.QDLPNAMNAAEITDK.L [127, 141]    | ARF1 peptide ratio, 3   | 0.79 | 0.79 | 0.87 | 0.81 | 0.04    |
| <b>ARF3</b>   |                                   | ARF3 protein ratio      |      |      |      | 1.06 | #DIV/0! |
|               | R.VNEAREELMR.M [99, 108] (missed  | ARF3 peptide ratio, 1   | ND   | ND   | ND   | ND   | ND      |
|               | R.VNEAREELMR.M [99, 108] (missed  | ARF3 peptide ratio, 2   | 1.00 | 0.99 | 1.60 | 1.14 | 0.29    |
|               | K.LGLHSLR.H [142, 148]            | ARF3 peptide ratio, 3   | 1.08 | 1.09 | 1.00 | 1.05 | 0.04    |
| <b>ARF4</b>   |                                   | ARF4 protein ratio      |      |      |      | 0.86 | #DIV/0! |
|               | K.NICFTVWDVGGQDR.I [59, 72]       | ARF4 peptide ratio, 1   | 0.89 | 1.26 | 0.87 | 0.98 | 0.18    |
|               | R.IQEVADLQK.M [99, 108]           | ARF4 peptide ratio, 2   | 0.84 | 0.85 | 1.12 | 0.92 | 0.13    |
|               | R.DAVLLLLFANK.Q [117, 126]        | ARF4 peptide ratio, 3   | 0.81 | 4.91 | 1.24 | 1.34 | 1.84    |
|               | K.LGLQSLR.N [142, 148]            | ARF4 peptide ratio, 4   | 0.94 | 0.95 | 0.87 | 0.92 | 0.03    |
| <b>ARF5</b>   |                                   | ARF5 protein ratio      |      |      |      | 1.14 | #DIV/0! |

|               |                                        |                         |      |      |      |      |         |
|---------------|----------------------------------------|-------------------------|------|------|------|------|---------|
|               | K.NICFTVWDVGGQDK.I [59, 72]            | ARF5 peptide ratio, 1   | 2.21 | 3.16 | 0.37 | 0.86 | 1.16    |
|               | R.VQESADELQK.M [99, 108]               | ARF5 peptide ratio, 2   | 2.37 | 2.68 | 0.34 | 0.80 | 1.04    |
|               | K.LGLQLHLR.S [142, 148]                | ARF5 peptide ratio, 3   | 1.47 | 1.29 | 1.17 | 1.30 | 0.12    |
| <b>ARF6</b>   |                                        | ARF6 protein ratio      |      |      |      | 1.12 | #DIV/0! |
|               | R.ILMLGLDAAGK.T [15, 25]               | ARF6 peptide ratio, 1   | 0.97 | 0.67 | 1.06 | 0.86 | 0.17    |
|               | R.ILMLGLDAAGK.T [15, 25]               | ARF6 peptide ratio, 2   | 4.42 | 1.60 | 1.12 | 1.72 | 1.45    |
|               | K.LGQSVTTIPTVGFNVETVTK.N [34, 34]      | ARF6 peptide ratio, 3   | 0.65 | 1.69 | 1.10 | 0.99 | 0.43    |
|               | K.FNVWDVGGQDK.I [58, 68]               | ARF6 peptide ratio, 4   | ND   | ND   | ND   | ND   | ND      |
| <b>RALA</b>   |                                        | RALA protein ratio      |      |      |      | 0.55 | #DIV/0! |
|               | K.GQNSLALHK.V [7, 15]                  | RALA peptide ratio, 1   | 0.10 | 0.43 | 0.17 | 0.17 | 0.14    |
|               | K.EDENVPFLLVGNK.S [115, 127]           | RALA peptide ratio, 2   | 0.42 | 0.56 | 1.04 | 0.59 | 0.26    |
|               | R.QVSVEEAK.N [135, 142]                | RALA peptide ratio, 3   | 1.25 | 4.71 | 1.08 | 1.55 | 1.67    |
|               | R.AEQWNVNYVETSAK.T [145, 158]          | RALA peptide ratio, 4   | 0.92 | 0.93 | 0.52 | 0.73 | 0.19    |
| <b>RHOT1</b>  |                                        | RHOT1 protein ratio     |      |      |      | ND   | #DIV/0! |
|               | R.LPLILVGNK.S [110, 118]               | RHOT1 peptide ratio, 1  | ND   | ND   | ND   | ND   | ND      |
|               | K.AVLHPTGPLYCPEEK.E [164, 178]         | RHOT1 peptide ratio, 2  | ND   | ND   | ND   | ND   | ND      |
|               | R.ICFNTPLAPQALEDVK.N [214, 229]        | RHOT1 peptide ratio, 3  | ND   | ND   | ND   | ND   | ND      |
| <b>ARL1</b>   |                                        | ARL1 protein ratio      |      |      |      | 1.24 | #DIV/0! |
|               | R.ILILGLDGAGK.T [19, 29]               | ARL1 peptide ratio, 1   | 0.98 | 2.01 | 3.30 | 1.65 | 0.95    |
|               | K.FQVWDLGGQTSIRPYWR.C [62, 78]         | ARL1 peptide ratio, 2   | 2.14 | 0.24 | 0.78 | 0.50 | 0.80    |
|               | K.AILVVFANK.Q [118, 126]               | ARL1 peptide ratio, 3   | 0.79 | 0.60 | 1.89 | 0.86 | 0.57    |
| <b>RAC1</b>   |                                        | RAC1 protein ratio      |      |      |      | 0.50 | #DIV/0! |
|               | R.LRPLSYPQTVGETYK.D [66, 81]           | RAC1 peptide ratio, 1   | 0.50 | 0.55 | 0.45 | 0.50 | 0.04    |
| <b>RABL2B</b> |                                        | RABL2B protein ratio    |      |      |      | 1.50 | #DIV/0! |
|               | K.IDADINVTQK.S [134, 143]              | RABL2B peptide ratio, 1 | 1.53 | 1.69 | 1.33 | 1.50 | 0.15    |
| <b>ARL16</b>  |                                        | ARL16 protein ratio     |      |      |      | ND   | #DIV/0! |
|               | K.GDLGEPPTRPTVGTNLTDIVAQR.R [177, 184] | ARL16 peptide ratio, 1  | ND   | ND   | ND   | ND   | ND      |
|               | K.QNITTAEISAR.E [166, 176]             | ARL16 peptide ratio, 2  | ND   | ND   | ND   | ND   | ND      |
|               | R.EGTGLAGVLAWLQATHR.A [177, 184]       | ARL16 peptide ratio, 3  | ND   | ND   | ND   | ND   | ND      |
| <b>REM1</b>   |                                        | REM1 protein ratio      |      |      |      | ND   | #DIV/0! |
|               | R.LSTVPSTQSQHPR.L [32, 44]             | REM1 peptide ratio, 1   | ND   | ND   | ND   | ND   | ND      |
|               | K.TSLASLFAGK.Q [93, 102]               | REM1 peptide ratio, 2   | ND   | ND   | ND   | ND   | ND      |
|               | R.DLHEQLGEDVYER.T [106, 118]           | REM1 peptide ratio, 3   | ND   | ND   | ND   | ND   | ND      |
|               | R.GSFESASELR.I [166, 175]              | REM1 peptide ratio, 4   | ND   | ND   | ND   | ND   | ND      |
| <b>RAB14</b>  |                                        | RAB14 protein ratio     |      |      |      | 0.89 | #DIV/0! |
|               | K.YIIIGDMGVGK.S [13, 23]               | RAB14 peptide ratio, 1  | 1.20 | 1.16 | 1.19 | 1.18 | 0.01    |
|               | R.STYNHLSSWLTAR.N [96, 109]            | RAB14 peptide ratio, 2  | 0.90 | 0.86 | 1.25 | 0.98 | 0.17    |
|               | K.TGENVEDAFLEAAK.K [156, 169]          | RAB14 peptide ratio, 3  | 1.71 | 0.84 | 0.64 | 0.90 | 0.47    |
| <b>SRPRB</b>  |                                        | SRPRB protein ratio     |      |      |      | 1.00 | #DIV/0! |
|               | R.AVLLVGLCDSGK.T [65, 76]              | SRPRB peptide ratio, 1  | 1.88 | 3.84 | 1.12 | 1.78 | 1.15    |
|               | R.DTQTSITDSCAVYR.V [90, 103]           | SRPRB peptide ratio, 2  | 0.90 | 0.78 | 0.60 | 0.74 | 0.12    |
|               | K.LIQQQLEK.E [191, 198]                | SRPRB peptide ratio, 3  | 1.02 | 0.91 | 1.05 | 0.99 | 0.06    |
| <b>RAB35</b>  |                                        | RAB35 protein ratio     |      |      |      | 0.74 | #DIV/0! |
|               | R.TITSTYYR.G [71, 78]                  | RAB35 peptide ratio, 1  | 0.77 | 0.79 | 0.70 | 0.75 | 0.04    |
|               | R.WLHEINQNCDDVCR.I [101, 114]          | RAB35 peptide ratio, 2  | 0.66 | 0.78 | 0.66 | 0.70 | 0.05    |
|               | K.VVETEDAYK.F [128, 136]               | RAB35 peptide ratio, 3  | ND   | ND   | ND   | ND   | ND      |
|               | K.FAGQMGIQLFETSAK.E [137, 151]         | RAB35 peptide ratio, 4  | ND   | ND   | ND   | ND   | ND      |
|               | K.FAGQMGIQLFETSAK.E [137, 151]         | RAB35 peptide ratio, 5  | ND   | ND   | ND   | ND   | ND      |
| <b>RAB3B</b>  |                                        | RAB3B protein ratio     |      |      |      | ND   | #DIV/0! |
|               | K.DASDQNFDFYMFK.L [12, 23]             | RAB3B peptide ratio, 1  | ND   | ND   | ND   | ND   | ND      |
|               | K.GQLLAEQLGFDFFEASAK.E [149, 162]      | RAB3B peptide ratio, 2  | ND   | ND   | ND   | ND   | ND      |
|               | K.MSDSLDTPSMLGSSK.N [186, 201]         | RAB3B peptide ratio, 3  | ND   | ND   | ND   | ND   | ND      |
| <b>RAB30</b>  |                                        | RAB30 protein ratio     |      |      |      | 1.87 | #DIV/0! |
|               | K.IVLIGNAGVGK.T [11, 21]               | RAB30 peptide ratio, 1  | 2.17 | 2.09 | 3.20 | 2.39 | 0.50    |
|               | R.EIEQYASNK.V [105, 113]               | RAB30 peptide ratio, 2  | 1.59 | 4.96 | 2.84 | 2.54 | 1.39    |
|               | K.VITVLVGNK.I [114, 122]               | RAB30 peptide ratio, 3  | 3.11 | 2.62 | 1.62 | 2.27 | 0.62    |
|               | K.LFLDLACR.L [161, 168]                | RAB30 peptide ratio, 4  | ND   | ND   | ND   | ND   | ND      |
|               | R.QNTLVNNSPLPGEK.S [175, 190]          | RAB30 peptide ratio, 5  | ND   | ND   | ND   | ND   | ND      |
| <b>RHOF</b>   |                                        | RHOF protein ratio      |      |      |      | ND   | #DIV/0! |
|               | K.IVIVGDGGCGK.T [21, 31]               | RHOF peptide ratio, 1   | ND   | ND   | ND   | ND   | ND      |
|               | K.YTASVTVGSK.E [55, 64]                | RHOF peptide ratio, 2   | ND   | ND   | ND   | ND   | ND      |
|               | K.EVTLNLYDTAGQEDYDR.L [65, 81]         | RHOF peptide ratio, 3   | ND   | ND   | ND   | ND   | ND      |
|               | K.WFPEVTHFCR.G [112, 121]              | RHOF peptide ratio, 4   | ND   | ND   | ND   | ND   | ND      |
|               | R.AALYLECSAK.F [166, 175]              | RHOF peptide ratio, 5   | ND   | ND   | ND   | ND   | ND      |
| <b>RAB34</b>  |                                        | RAB34 protein ratio     |      |      |      | ND   | #DIV/0! |
|               | K.VIVVGDLSVGK.T [54, 64]               | RAB34 peptide ratio, 1  | ND   | ND   | ND   | ND   | ND      |
|               | R.FEVLGIPFSLQLWDTAGQER.F [93, 103]     | RAB34 peptide ratio, 2  | ND   | ND   | ND   | ND   | ND      |
|               | K.ENDPSSVLLFLVGSK.K [152, 166]         | RAB34 peptide ratio, 3  | ND   | ND   | ND   | ND   | ND      |
|               | K.AEYWAVSSLTGENVR.E [191, 205]         | RAB34 peptide ratio, 4  | ND   | ND   | ND   | ND   | ND      |
|               | R.INSDDSNLYLTASK.K [238, 251]          | RAB34 peptide ratio, 5  | ND   | ND   | ND   | ND   | ND      |
| <b>RAB43</b>  |                                        | RAB43 protein ratio     |      |      |      | 1.08 | #DIV/0! |
|               | K.YAGSNIVQLLIGNK.S [118, 131]          | RAB43 peptide ratio, 1  | 0.86 | 1.00 | 1.23 | 1.01 | 0.15    |
|               | K.DSSNVEEAFLR.V [164, 174]             | RAB43 peptide ratio, 2  | ND   | ND   | ND   | ND   | ND      |
|               | R.VATELIMR.H [175, 182]                | RAB43 peptide ratio, 3  | ND   | ND   | ND   | ND   | ND      |

|                    |                                   |                           |      |      |      |      |         |
|--------------------|-----------------------------------|---------------------------|------|------|------|------|---------|
|                    | K.SPDHIQLNSK.D [192, 201]         | RAB43 peptide ratio, 4    | 1.30 | 0.69 | 1.48 | 1.04 | 0.34    |
| <b>NKIRAS1</b>     |                                   | NKIRAS1 protein ratio     |      |      |      | 0.62 | #DIV/0! |
|                    | K.VVVCGLLSVVGK.T [6, 16]          | NKIRAS1 peptide ratio, 1  | 0.93 | 0.86 | 0.75 | 0.84 | 0.07    |
|                    | R.QVDAEVAQQWAK.S [128, 139]       | NKIRAS1 peptide ratio, 2  | 0.11 | 6.87 | 0.43 | 0.25 | 3.12    |
|                    | K.TLIEPFTLLASK.L [155, 166]       | NKIRAS1 peptide ratio, 3  | 0.99 | 0.83 | 1.17 | 0.98 | 0.14    |
| <b>RAB12</b>       |                                   | RAB12 protein ratio       |      |      |      | 0.29 | #DIV/0! |
|                    | R.AGGGGGLGAGSPALSGGQGR.R [        | RAB12 peptide ratio, 1    | 0.30 | 0.24 | 0.44 | 0.30 | 0.08    |
|                    | K.LQVIIIGSR.G [42, 50]            | RAB12 peptide ratio, 2    | 0.43 | 0.39 | 0.37 | 0.40 | 0.03    |
|                    | R.FTDDTFCEACK.S [61, 71]          | RAB12 peptide ratio, 3    | 3.18 | 0.39 | 0.37 | 0.54 | 1.32    |
|                    | R.FNSITSAYYR.S [103, 112]         | RAB12 peptide ratio, 4    | 0.59 | 0.63 | 0.44 | 0.54 | 0.08    |
|                    | K.FAQQITGMR.F [172, 180]          | RAB12 peptide ratio, 5    | ND   | ND   | ND   | ND   | ND      |
| <b>KRAS</b>        |                                   | KRAS(4A) protein ratio    |      |      |      | ND   | #DIV/0! |
| Isoform 2A         | K.DSEDVPMVLVGNK.C [104, 116]      | KRAS(4A) peptide ratio, 1 | ND   | ND   | ND   | ND   | ND      |
| Isoform 2A         | R.QRVEDAFYTLVR.E [149, 160] (miss | KRAS(4A) peptide ratio, 2 | ND   | ND   | ND   | ND   | ND      |
| Isoform 2A         | R.VEDAFYTLVR.E [151, 160]         | KRAS(4A) peptide ratio, 3 | ND   | ND   | ND   | ND   | ND      |
| <b>KRAS</b>        |                                   | KRAS(4B) protein ratio    |      |      |      | 0.88 | #DIV/0! |
| Isoform 2B         | R.SYGIPFIETSAK.T [135, 146]       | KRAS(4B) peptide ratio, 1 | 1.31 | 0.61 | 1.02 | 0.89 | 0.29    |
| Isoform 2B         | K.TRQGVDDAFYTLVR.E [147, 160] (n  | KRAS(4B) peptide ratio, 2 | 3.18 | 4.02 | 0.42 | 1.02 | 1.54    |
| Isoform 2B         | R.QGVDDAFYTLVR.E [149, 160]       | KRAS(4B) peptide ratio, 3 | 2.76 | 0.67 | 2.02 | 1.28 | 0.86    |
| <b>RAB11A</b>      |                                   | RAB11A protein ratio      |      |      |      | ND   | #DIV/0! |
|                    | K.NGLSFIETSALDSTNVEAAFQILTET      | RAB11A peptide ratio, 1   | ND   | ND   | ND   | ND   | ND      |
| <b>RHOT2</b>       |                                   | RHOT2 protein ratio       |      |      |      | ND   | #DIV/0! |
|                    | K.WIPLVNGGTTQGPR.V [96, 109]      | RHOT2 peptide ratio, 1    | ND   | ND   | ND   | ND   | ND      |
|                    | K.SAFLQAFLGR.G [429, 438]         | RHOT2 peptide ratio, 2    | ND   | ND   | ND   | ND   | ND      |
|                    | K.ADLPEGVAVSGPSPAEFQR.K [525,     | RHOT2 peptide ratio, 3    | ND   | ND   | ND   | ND   | ND      |
| <b>RAB19</b>       |                                   | RAB19 protein ratio       |      |      |      | ND   | #DIV/0! |
|                    | R.AADENFDYLFK.I [76, 86]          | RAB19 peptide ratio, 1    | ND   | ND   | ND   | ND   | ND      |
|                    | K.IILIGDSNVGK.T [87, 97]          | RAB19 peptide ratio, 2    | ND   | ND   | ND   | ND   | ND      |
|                    | K.MQVWDTAGQER.F [135, 145]        | RAB19 peptide ratio, 3    | ND   | ND   | ND   | ND   | ND      |
|                    | R.SAHAIIAYDLTR.R [156, 168]       | RAB19 peptide ratio, 4    | ND   | ND   | ND   | ND   | ND      |
|                    | R.HVLFEDACTLAEK.Y [205, 217]      | RAB19 peptide ratio, 5    | ND   | ND   | ND   | ND   | ND      |
| <b>RHOA</b>        |                                   | RHOA protein ratio        |      |      |      | 0.73 | #DIV/0! |
|                    | K.QEPVKPEEGR.D [135, 144]         | RHOA peptide ratio, 1     | ND   | ND   | ND   | ND   | ND      |
|                    | R.IGAFGYMECSAK.T [150, 161]       | RHOA peptide ratio, 2     | 0.78 | 0.81 | 0.41 | 0.60 | 0.18    |
|                    | R.IGAFGYMECSAK.T [150, 161]       | RHOA peptide ratio, 3     | 0.82 | 0.81 | 1.12 | 0.89 | 0.14    |
| <b>RAB4A</b>       |                                   | RAB4A protein ratio       |      |      |      | 0.95 | #DIV/0! |
|                    | K.FLVIGNAGTGK.S [15, 25]          | RAB4A peptide ratio, 1    | 0.89 | 0.95 | 1.11 | 0.98 | 0.09    |
|                    | K.IESGELDPER.M [177, 186]         | RAB4A peptide ratio, 2    | 0.81 | 0.86 | 1.28 | 0.95 | 0.21    |
|                    | R.MGSGIQYGDAALR.Q [187, 199]      | RAB4A peptide ratio, 3    | ND   | ND   | ND   | ND   | ND      |
| <b>RAN</b>         |                                   | RAN protein ratio         |      |      |      | 0.80 | #DIV/0! |
|                    | K.FNVWDTAGQEK.F [60, 70]          | RAN peptide ratio, 1      | 0.74 | 0.69 | 0.80 | 0.74 | 0.04    |
|                    | R.VCENIPIVLCGNK.V [110, 122]      | RAN peptide ratio, 2      | 0.88 | 1.31 | 2.39 | 1.30 | 0.63    |
|                    | K.NLQYYDISAK.S [142, 151]         | RAN peptide ratio, 3      | 0.75 | 0.74 | 1.01 | 0.82 | 0.13    |
| <b>RAB34</b>       |                                   | RAB34 protein ratio       |      |      |      | ND   | #DIV/0! |
|                    | -.MSHLPGLELR.R [0, 9]             | RAB34 peptide ratio, 1    | ND   | ND   | ND   | ND   | ND      |
|                    | R.VLAELPQCLR.K [68, 77]           | RAB34 peptide ratio, 2    | ND   | ND   | ND   | ND   | ND      |
| <b>RAB11A</b>      |                                   | RAB11A protein ratio      |      |      |      | ND   | #DIV/0! |
|                    | R.ENDMSPSNNVVPIHVPPTTENKPK        | RAB11A peptide ratio, 1   | ND   | ND   | ND   | ND   | ND      |
|                    | R.ENDMSPSNNVVPIHVPPTTENKPK        | RAB11A peptide ratio, 2   | ND   | ND   | ND   | ND   | ND      |
| <b>RABL4/IFT27</b> |                                   | RABL4 protein ratio       |      |      |      | 2.29 | #DIV/0! |
|                    | K.CILAGDPAVGK.T [7, 17]           | RABL4 peptide ratio, 1    | ND   | ND   | ND   | ND   | ND      |
|                    | K.TALAQIFR.S [18, 25]             | RABL4 peptide ratio, 2    | 2.37 | 2.40 | 2.12 | 2.29 | 0.13    |
|                    | R.SQAPGISLPGVLVGNK.T [108, 123]   | RABL4 peptide ratio, 3    | ND   | ND   | ND   | ND   | ND      |
